# Supplementary material for: Bioactivity-Guided Identification of Botanical Inhibitors of Ketohexokinase
Source: PubMed Central journal article supplement (PMC4913896; doi:10.1371/journal.pone.0157458), 2016-06-20
Supplement: pone.0157458.s001.pdf [file pone.0157458.s001.pdf]

**S1 Table. Data from Screening of Botanical Extract Library for Inhibition of KHKC Activity.**

| Rxn ID  | Sample          |         |              | Sample<br>( OD <sub>340nm</sub> ) | Ave. No Fructose Controls<br>( OD <sub>340nm</sub> ) | Ave. Fructose Only Controls<br>( OD <sub>340nm</sub> ) | KHKC<br>Inhibition (%) |
|---------|-----------------|---------|--------------|-----------------------------------|------------------------------------------------------|--------------------------------------------------------|------------------------|
|         | Botanical Plate | Well    | Conc (µg/mL) |                                   |                                                      |                                                        |                        |
| Rxn #02 | FTL Plate 21    | A1: NFC | -            | 0.062                             | 0.0626                                               | 0.557                                                  | 100.1                  |
| Rxn #02 | FTL Plate 21    | B1      | 50           | 0.475                             | 0.0626                                               | 0.557                                                  | 16.6                   |
| Rxn #02 | FTL Plate 21    | C1      | 50           | 0.506                             | 0.0626                                               | 0.557                                                  | 10.3                   |
| Rxn #02 | FTL Plate 21    | D1      | 50           | 0.476                             | 0.0626                                               | 0.557                                                  | 16.4                   |
| Rxn #02 | FTL Plate 21    | E1      | 50           | 0.493                             | 0.0626                                               | 0.557                                                  | 12.9                   |
| Rxn #02 | FTL Plate 21    | F1      | 50           | 0.520                             | 0.0626                                               | 0.557                                                  | 7.5                    |
| Rxn #02 | FTL Plate 21    | G1      | 50           | 0.484                             | 0.0626                                               | 0.557                                                  | 14.8                   |
| Rxn #02 | FTL Plate 21    | H1: FOC | -            | 0.555                             | 0.0626                                               | 0.557                                                  | 0.4                    |
| Rxn #02 | FTL Plate 21    | A2: NFC | -            | 0.067                             | 0.0626                                               | 0.557                                                  | 99.1                   |
| Rxn #02 | FTL Plate 21    | B2      | 50           | 0.559                             | 0.0626                                               | 0.557                                                  | -0.4                   |
| Rxn #02 | FTL Plate 21    | C2      | 50           | 0.580                             | 0.0626                                               | 0.557                                                  | -4.7                   |
| Rxn #02 | FTL Plate 21    | D2      | 50           | 0.541                             | 0.0626                                               | 0.557                                                  | 3.2                    |
| Rxn #02 | FTL Plate 21    | E2      | 50           | 0.546                             | 0.0626                                               | 0.557                                                  | 2.2                    |
| Rxn #02 | FTL Plate 21    | F2      | 50           | 0.522                             | 0.0626                                               | 0.557                                                  | 7.1                    |
| Rxn #02 | FTL Plate 21    | G2      | 50           | 0.534                             | 0.0626                                               | 0.557                                                  | 4.7                    |
| Rxn #02 | FTL Plate 21    | H2: FOC | -            | 0.577                             | 0.0626                                               | 0.557                                                  | -4.0                   |
| Rxn #02 | FTL Plate 21    | A3: NFC | -            | 0.062                             | 0.0626                                               | 0.557                                                  | 100.1                  |
| Rxn #02 | FTL Plate 21    | B3      | 50           | 0.609                             | 0.0626                                               | 0.557                                                  | -10.5                  |
| Rxn #02 | FTL Plate 21    | C3      | 50           | 0.558                             | 0.0626                                               | 0.557                                                  | -0.2                   |
| Rxn #02 | FTL Plate 21    | D3      | 50           | 0.589                             | 0.0626                                               | 0.557                                                  | -6.5                   |
| Rxn #02 | FTL Plate 21    | E3      | 50           | 0.570                             | 0.0626                                               | 0.557                                                  | -2.6                   |
| Rxn #02 | FTL Plate 21    | F3      | 50           | 0.557                             | 0.0626                                               | 0.557                                                  | 0.0                    |
| Rxn #02 | FTL Plate 21    | G3      | 50           | 0.547                             | 0.0626                                               | 0.557                                                  | 2.0                    |
| Rxn #02 | FTL Plate 21    | H3: FOC | -            | 0.573                             | 0.0626                                               | 0.557                                                  | -3.2                   |
| Rxn #02 | FTL Plate 21    | A4: NFC | -            | 0.062                             | 0.0626                                               | 0.557                                                  | 100.1                  |
| Rxn #02 | FTL Plate 21    | B4      | 50           | 0.592                             | 0.0626                                               | 0.557                                                  | -7.1                   |
| Rxn #02 | FTL Plate 21    | C4      | 50           | 0.577                             | 0.0626                                               | 0.557                                                  | -4.0                   |
| Rxn #02 | FTL Plate 21    | D4      | 50           | 0.580                             | 0.0626                                               | 0.557                                                  | -4.7                   |
| Rxn #02 | FTL Plate 21    | E4      | 50           | 0.567                             | 0.0626                                               | 0.557                                                  | -2.0                   |
| Rxn #02 | FTL Plate 21    | F4      | 50           | 0.556                             | 0.0626                                               | 0.557                                                  | 0.2                    |
| Rxn #02 | FTL Plate 21    | G4      | 50           | 0.547                             | 0.0626                                               | 0.557                                                  | 2.0                    |
| Rxn #02 | FTL Plate 21    | H4: FOC | -            | 0.563                             | 0.0626                                               | 0.557                                                  | -1.2                   |
| Rxn #02 | FTL Plate 21    | A5: NFC | -            | 0.056                             | 0.0626                                               | 0.557                                                  | 101.3                  |
| Rxn #02 | FTL Plate 21    | B5: NFC | -            | 0.058                             | 0.0626                                               | 0.557                                                  | 100.9                  |
| Rxn #02 | FTL Plate 21    | C5: NFC | -            | 0.058                             | 0.0626                                               | 0.557                                                  | 100.9                  |
| Rxn #02 | FTL Plate 21    | D5: NFC | -            | 0.053                             | 0.0626                                               | 0.557                                                  | 101.9                  |
| Rxn #02 | FTL Plate 21    | E5: FOC | -            | 0.566                             | 0.0626                                               | 0.557                                                  | -1.8                   |
| Rxn #02 | FTL Plate 21    | F5: FOC | -            | 0.552                             | 0.0626                                               | 0.557                                                  | 1.0                    |
| Rxn #02 | FTL Plate 21    | G5: FOC | -            | 0.556                             | 0.0626                                               | 0.557                                                  | 0.2                    |
| Rxn #02 | FTL Plate 21    | H5: FOC | -            | 0.555                             | 0.0626                                               | 0.557                                                  | 0.4                    |
| Rxn #02 | FTL Plate 21    | A6: NFC | -            | 0.055                             | 0.0626                                               | 0.557                                                  | 101.5                  |
| Rxn #02 | FTL Plate 21    | B6      | 50           | 0.579                             | 0.0626                                               | 0.557                                                  | -4.4                   |
| Rxn #02 | FTL Plate 21    | C6      | 50           | 0.561                             | 0.0626                                               | 0.557                                                  | -0.8                   |
| Rxn #02 | FTL Plate 21    | D6      | 50           | 0.579                             | 0.0626                                               | 0.557                                                  | -4.4                   |
| Rxn #02 | FTL Plate 21    | E6      | 50           | 0.460                             | 0.0626                                               | 0.557                                                  | 19.6                   |
| Rxn #02 | FTL Plate 21    | F6      | 50           | 0.537                             | 0.0626                                               | 0.557                                                  | 4.0                    |
| Rxn #02 | FTL Plate 21    | G6      | 50           | 0.541                             | 0.0626                                               | 0.557                                                  | 3.2                    |
| Rxn #02 | FTL Plate 21    | H6: FOC | -            | 0.558                             | 0.0626                                               | 0.557                                                  | -0.2                   |
| Rxn #02 | FTL Plate 21    | A7: NFC | -            | 0.055                             | 0.0626                                               | 0.557                                                  | 101.5                  |
| Rxn #02 | FTL Plate 21    | B7      | 50           | 0.553                             | 0.0626                                               | 0.557                                                  | 0.8                    |
| Rxn #02 | FTL Plate 21    | C7      | 50           | 0.526                             | 0.0626                                               | 0.557                                                  | 6.3                    |
| Rxn #02 | FTL Plate 21    | D7      | 50           | 0.531                             | 0.0626                                               | 0.557                                                  | 5.3                    |
| Rxn #02 | FTL Plate 21    | E7      | 50           | 0.564                             | 0.0626                                               | 0.557                                                  | -1.4                   |
| Rxn #02 | FTL Plate 21    | F7      | 50           | 0.544                             | 0.0626                                               | 0.557                                                  | 2.6                    |
| Rxn #02 | FTL Plate 21    | G7      | 50           | 0.554                             | 0.0626                                               | 0.557                                                  | 0.6                    |
| Rxn #02 | FTL Plate 21    | H7: FOC | -            | 0.564                             | 0.0626                                               | 0.557                                                  | -1.4                   |
| Rxn #02 | FTL Plate 21    | A8: NFC | -            | 0.061                             | 0.0626                                               | 0.557                                                  | 100.3                  |
| Rxn #02 | FTL Plate 21    | B8      | 50           | 0.542                             | 0.0626                                               | 0.557                                                  | 3.0                    |
| Rxn #02 | FTL Plate 21    | C8      | 50           | 0.570                             | 0.0626                                               | 0.557                                                  | -2.6                   |
| Rxn #02 | FTL Plate 21    | D8      | 50           | 0.541                             | 0.0626                                               | 0.557                                                  | 3.2                    |
| Rxn #02 | FTL Plate 21    | E8      | 50           | 0.613                             | 0.0626                                               | 0.557                                                  | -11.3                  |
| Rxn #02 | FTL Plate 21    | F8      | 50           | 0.564                             | 0.0626                                               | 0.557                                                  | -1.4                   |
| Rxn #02 | FTL Plate 21    | G8      | 50           | 0.600                             | 0.0626                                               | 0.557                                                  | -8.7                   |
| Rxn #02 | FTL Plate 21    | H8: FOC | -            | 0.551                             | 0.0626                                               | 0.557                                                  | 1.2                    |
| Rxn #02 | FTL Plate 21    | A9: NFC | -            | 0.071                             | 0.0626                                               | 0.557                                                  | 98.3                   |
| Rxn #02 | FTL Plate 21    | B9      | 50           | 0.577                             | 0.0626                                               | 0.557                                                  | -4.0                   |
| Rxn #02 | FTL Plate 21    | C9      | 50           | 0.525                             | 0.0626                                               | 0.557                                                  | 6.5                    |
| Rxn #02 | FTL Plate 21    | D9      | 50           | 0.561                             | 0.0626                                               | 0.557                                                  | -0.8                   |
| Rxn #02 | FTL Plate 21    | E9      | 50           | 0.548                             | 0.0626                                               | 0.557                                                  | 1.8                    |
| Rxn #02 | FTL Plate 21    | F9      | 50           | 0.560                             | 0.0626                                               | 0.557                                                  | -0.6                   |

**S1 Table. Data from Screening of Botanical Extract Library for Inhibition of KHKC Activity.**

| Rxn ID  | Sample          |          |              | Sample<br>( OD <sub>340nm</sub> ) | Ave. No Fructose Controls<br>( OD <sub>340nm</sub> ) | Ave. Fructose Only Controls<br>( OD <sub>340nm</sub> ) | KHKC<br>Inhibition (%) |
|---------|-----------------|----------|--------------|-----------------------------------|------------------------------------------------------|--------------------------------------------------------|------------------------|
|         | Botanical Plate | Well     | Conc (µg/mL) |                                   |                                                      |                                                        |                        |
| Rxn #02 | FTL Plate 21    | G9       | 50           | 0.533                             | 0.0626                                               | 0.557                                                  | 4.9                    |
| Rxn #02 | FTL Plate 21    | H9: FOC  | -            | 0.545                             | 0.0626                                               | 0.557                                                  | 2.4                    |
| Rxn #02 | FTL Plate 21    | A10: NFC | -            | 0.069                             | 0.0626                                               | 0.557                                                  | 98.7                   |
| Rxn #02 | FTL Plate 21    | B10      | 50           | 0.549                             | 0.0626                                               | 0.557                                                  | 1.6                    |
| Rxn #02 | FTL Plate 21    | C10      | 50           | 0.546                             | 0.0626                                               | 0.557                                                  | 2.2                    |
| Rxn #02 | FTL Plate 21    | D10      | 50           | 0.549                             | 0.0626                                               | 0.557                                                  | 1.6                    |
| Rxn #02 | FTL Plate 21    | E10      | 50           | 0.535                             | 0.0626                                               | 0.557                                                  | 4.4                    |
| Rxn #02 | FTL Plate 21    | F10      | 50           | 0.560                             | 0.0626                                               | 0.557                                                  | -0.6                   |
| Rxn #02 | FTL Plate 21    | G10      | 50           | 0.539                             | 0.0626                                               | 0.557                                                  | 3.6                    |
| Rxn #02 | FTL Plate 21    | H10: FOC | -            | 0.549                             | 0.0626                                               | 0.557                                                  | 1.6                    |
| Rxn #02 | FTL Plate 21    | A11: NFC | -            | 0.074                             | 0.0626                                               | 0.557                                                  | 97.7                   |
| Rxn #02 | FTL Plate 21    | B11      | 50           | 0.574                             | 0.0626                                               | 0.557                                                  | -3.4                   |
| Rxn #02 | FTL Plate 21    | C11      | 50           | 0.578                             | 0.0626                                               | 0.557                                                  | -4.2                   |
| Rxn #02 | FTL Plate 21    | D11      | 50           | 0.552                             | 0.0626                                               | 0.557                                                  | 1.0                    |
| Rxn #02 | FTL Plate 21    | E11      | 50           | 0.510                             | 0.0626                                               | 0.557                                                  | 9.5                    |
| Rxn #02 | FTL Plate 21    | F11      | 50           | 0.538                             | 0.0626                                               | 0.557                                                  | 3.8                    |
| Rxn #02 | FTL Plate 21    | G11      | 50           | 0.542                             | 0.0626                                               | 0.557                                                  | 3.0                    |
| Rxn #02 | FTL Plate 21    | H11: FOC | -            | 0.545                             | 0.0626                                               | 0.557                                                  | 2.4                    |
| Rxn #02 | FTL Plate 21    | A12: NFC | -            | 0.076                             | 0.0626                                               | 0.557                                                  | 97.3                   |
| Rxn #02 | FTL Plate 21    | H12: FOC | -            | 0.546                             | 0.0626                                               | 0.557                                                  | 2.2                    |
| Rxn #04 | FTL Plate 4     | A1: NFC  | -            | 0.058                             | 0.0563                                               | 0.504                                                  | 99.6                   |
| Rxn #04 | FTL Plate 4     | B1       | 50           | 0.474                             | 0.0563                                               | 0.504                                                  | 6.7                    |
| Rxn #04 | FTL Plate 4     | C1       | 50           | 0.448                             | 0.0563                                               | 0.504                                                  | 12.5                   |
| Rxn #04 | FTL Plate 4     | D1       | 50           | 0.439                             | 0.0563                                               | 0.504                                                  | 14.5                   |
| Rxn #04 | FTL Plate 4     | E1       | 50           | 0.468                             | 0.0563                                               | 0.504                                                  | 8.0                    |
| Rxn #04 | FTL Plate 4     | F1       | 50           | 0.439                             | 0.0563                                               | 0.504                                                  | 14.5                   |
| Rxn #04 | FTL Plate 4     | G1       | 50           | 0.453                             | 0.0563                                               | 0.504                                                  | 11.4                   |
| Rxn #04 | FTL Plate 4     | H1: FOC  | -            | 0.481                             | 0.0563                                               | 0.504                                                  | 5.1                    |
| Rxn #04 | FTL Plate 4     | A2: NFC  | -            | 0.064                             | 0.0563                                               | 0.504                                                  | 98.3                   |
| Rxn #04 | FTL Plate 4     | B2       | 50           | 0.469                             | 0.0563                                               | 0.504                                                  | 7.8                    |
| Rxn #04 | FTL Plate 4     | C2       | 50           | 0.456                             | 0.0563                                               | 0.504                                                  | 10.7                   |
| Rxn #04 | FTL Plate 4     | D2       | 50           | 0.485                             | 0.0563                                               | 0.504                                                  | 4.2                    |
| Rxn #04 | FTL Plate 4     | E2       | 50           | 0.448                             | 0.0563                                               | 0.504                                                  | 12.5                   |
| Rxn #04 | FTL Plate 4     | F2       | 50           | 0.486                             | 0.0563                                               | 0.504                                                  | 4.0                    |
| Rxn #04 | FTL Plate 4     | G2       | 50           | 0.449                             | 0.0563                                               | 0.504                                                  | 12.3                   |
| Rxn #04 | FTL Plate 4     | H2: FOC  | -            | 0.509                             | 0.0563                                               | 0.504                                                  | -1.1                   |
| Rxn #04 | FTL Plate 4     | A3: NFC  | -            | 0.054                             | 0.0563                                               | 0.504                                                  | 100.5                  |
| Rxn #04 | FTL Plate 4     | B3       | 50           | 0.484                             | 0.0563                                               | 0.504                                                  | 4.5                    |
| Rxn #04 | FTL Plate 4     | C3       | 50           | 0.511                             | 0.0563                                               | 0.504                                                  | -1.6                   |
| Rxn #04 | FTL Plate 4     | D3       | 50           | 0.478                             | 0.0563                                               | 0.504                                                  | 5.8                    |
| Rxn #04 | FTL Plate 4     | E3       | 50           | 0.522                             | 0.0563                                               | 0.504                                                  | -4.0                   |
| Rxn #04 | FTL Plate 4     | F3       | 50           | 0.495                             | 0.0563                                               | 0.504                                                  | 2.0                    |
| Rxn #04 | FTL Plate 4     | G3       | 50           | 0.432                             | 0.0563                                               | 0.504                                                  | 16.1                   |
| Rxn #04 | FTL Plate 4     | H3: FOC  | -            | 0.504                             | 0.0563                                               | 0.504                                                  | 0.0                    |
| Rxn #04 | FTL Plate 4     | A4: NFC  | -            | 0.063                             | 0.0563                                               | 0.504                                                  | 98.5                   |
| Rxn #04 | FTL Plate 4     | B4       | 50           | 0.512                             | 0.0563                                               | 0.504                                                  | -1.8                   |
| Rxn #04 | FTL Plate 4     | C4       | 50           | 0.467                             | 0.0563                                               | 0.504                                                  | 8.3                    |
| Rxn #04 | FTL Plate 4     | D4       | 50           | 0.504                             | 0.0563                                               | 0.504                                                  | 0.0                    |
| Rxn #04 | FTL Plate 4     | E4       | 50           | 0.468                             | 0.0563                                               | 0.504                                                  | 8.0                    |
| Rxn #04 | FTL Plate 4     | F4       | 50           | 0.515                             | 0.0563                                               | 0.504                                                  | -2.5                   |
| Rxn #04 | FTL Plate 4     | G4       | 50           | 0.453                             | 0.0563                                               | 0.504                                                  | 11.4                   |
| Rxn #04 | FTL Plate 4     | H4: FOC  | -            | 0.515                             | 0.0563                                               | 0.504                                                  | -2.5                   |
| Rxn #04 | FTL Plate 4     | A5: NFC  | -            | 0.051                             | 0.0563                                               | 0.504                                                  | 101.2                  |
| Rxn #04 | FTL Plate 4     | B5: NFC  | -            | 0.057                             | 0.0563                                               | 0.504                                                  | 99.8                   |
| Rxn #04 | FTL Plate 4     | C5: NFC  | -            | 0.052                             | 0.0563                                               | 0.504                                                  | 101.0                  |
| Rxn #04 | FTL Plate 4     | D5: NFC  | -            | 0.043                             | 0.0563                                               | 0.504                                                  | 103.0                  |
| Rxn #04 | FTL Plate 4     | E5: FOC  | -            | 0.522                             | 0.0563                                               | 0.504                                                  | -4.0                   |
| Rxn #04 | FTL Plate 4     | F5: FOC  | -            | 0.506                             | 0.0563                                               | 0.504                                                  | -0.4                   |
| Rxn #04 | FTL Plate 4     | G5: FOC  | -            | 0.496                             | 0.0563                                               | 0.504                                                  | 1.8                    |
| Rxn #04 | FTL Plate 4     | H5: FOC  | -            | 0.508                             | 0.0563                                               | 0.504                                                  | -0.9                   |
| Rxn #04 | FTL Plate 4     | A6: NFC  | -            | 0.057                             | 0.0563                                               | 0.504                                                  | 99.8                   |
| Rxn #04 | FTL Plate 4     | B6       | 50           | 0.508                             | 0.0563                                               | 0.504                                                  | -0.9                   |
| Rxn #04 | FTL Plate 4     | C6       | 50           | 0.504                             | 0.0563                                               | 0.504                                                  | 0.0                    |
| Rxn #04 | FTL Plate 4     | D6       | 50           | 0.471                             | 0.0563                                               | 0.504                                                  | 7.4                    |
| Rxn #04 | FTL Plate 4     | E6       | 50           | 0.505                             | 0.0563                                               | 0.504                                                  | -0.2                   |
| Rxn #04 | FTL Plate 4     | F6       | 50           | 0.497                             | 0.0563                                               | 0.504                                                  | 1.6                    |
| Rxn #04 | FTL Plate 4     | G6       | 50           | 0.445                             | 0.0563                                               | 0.504                                                  | 13.2                   |
| Rxn #04 | FTL Plate 4     | H6: FOC  | -            | 0.506                             | 0.0563                                               | 0.504                                                  | -0.4                   |
| Rxn #04 | FTL Plate 4     | A7: NFC  | -            | 0.051                             | 0.0563                                               | 0.504                                                  | 101.2                  |
| Rxn #04 | FTL Plate 4     | B7       | 50           | 0.503                             | 0.0563                                               | 0.504                                                  | 0.2                    |

**S1 Table. Data from Screening of Botanical Extract Library for Inhibition of KHKC Activity.**

| Rxn ID  | Sample          |          |              | Sample<br>( OD <sub>340nm</sub> ) | Ave. No Fructose Controls<br>( OD <sub>340nm</sub> ) | Ave. Fructose Only Controls<br>( OD <sub>340nm</sub> ) | KHKC<br>Inhibition (%) |
|---------|-----------------|----------|--------------|-----------------------------------|------------------------------------------------------|--------------------------------------------------------|------------------------|
|         | Botanical Plate | Well     | Conc (µg/mL) |                                   |                                                      |                                                        |                        |
| Rxn #04 | FTL Plate 4     | C7       | 50           | 0.474                             | 0.0563                                               | 0.504                                                  | 6.7                    |
| Rxn #04 | FTL Plate 4     | D7       | 50           | 0.501                             | 0.0563                                               | 0.504                                                  | 0.7                    |
| Rxn #04 | FTL Plate 4     | E7       | 50           | 0.512                             | 0.0563                                               | 0.504                                                  | -1.8                   |
| Rxn #04 | FTL Plate 4     | F7       | 50           | 0.468                             | 0.0563                                               | 0.504                                                  | 8.0                    |
| Rxn #04 | FTL Plate 4     | G7       | 50           | 0.482                             | 0.0563                                               | 0.504                                                  | 4.9                    |
| Rxn #04 | FTL Plate 4     | H7: FOC  | -            | 0.507                             | 0.0563                                               | 0.504                                                  | -0.7                   |
| Rxn #04 | FTL Plate 4     | A8: NFC  | -            | 0.052                             | 0.0563                                               | 0.504                                                  | 101.0                  |
| Rxn #04 | FTL Plate 4     | B8       | 50           | 0.495                             | 0.0563                                               | 0.504                                                  | 2.0                    |
| Rxn #04 | FTL Plate 4     | C8       | 50           | 0.494                             | 0.0563                                               | 0.504                                                  | 2.2                    |
| Rxn #04 | FTL Plate 4     | D8       | 50           | 0.468                             | 0.0563                                               | 0.504                                                  | 8.0                    |
| Rxn #04 | FTL Plate 4     | E8       | 50           | 0.486                             | 0.0563                                               | 0.504                                                  | 4.0                    |
| Rxn #04 | FTL Plate 4     | F8       | 50           | 0.479                             | 0.0563                                               | 0.504                                                  | 5.6                    |
| Rxn #04 | FTL Plate 4     | G8       | 50           | 0.448                             | 0.0563                                               | 0.504                                                  | 12.5                   |
| Rxn #04 | FTL Plate 4     | H8: FOC  | -            | 0.506                             | 0.0563                                               | 0.504                                                  | -0.4                   |
| Rxn #04 | FTL Plate 4     | A9: NFC  | -            | 0.057                             | 0.0563                                               | 0.504                                                  | 99.8                   |
| Rxn #04 | FTL Plate 4     | B9       | 50           | 0.507                             | 0.0563                                               | 0.504                                                  | -0.7                   |
| Rxn #04 | FTL Plate 4     | C9       | 50           | 0.504                             | 0.0563                                               | 0.504                                                  | 0.0                    |
| Rxn #04 | FTL Plate 4     | D9       | 50           | 0.503                             | 0.0563                                               | 0.504                                                  | 0.2                    |
| Rxn #04 | FTL Plate 4     | E9       | 50           | 0.518                             | 0.0563                                               | 0.504                                                  | -3.1                   |
| Rxn #04 | FTL Plate 4     | F9       | 50           | 0.479                             | 0.0563                                               | 0.504                                                  | 5.6                    |
| Rxn #04 | FTL Plate 4     | G9       | 50           | 0.342                             | 0.0563                                               | 0.504                                                  | 36.2                   |
| Rxn #04 | FTL Plate 4     | H9: FOC  | -            | 0.502                             | 0.0563                                               | 0.504                                                  | 0.4                    |
| Rxn #04 | FTL Plate 4     | A10: NFC | -            | 0.059                             | 0.0563                                               | 0.504                                                  | 99.4                   |
| Rxn #04 | FTL Plate 4     | B10      | 50           | 0.484                             | 0.0563                                               | 0.504                                                  | 4.5                    |
| Rxn #04 | FTL Plate 4     | C10      | 50           | 0.519                             | 0.0563                                               | 0.504                                                  | -3.4                   |
| Rxn #04 | FTL Plate 4     | D10      | 50           | 0.499                             | 0.0563                                               | 0.504                                                  | 1.1                    |
| Rxn #04 | FTL Plate 4     | E10      | 50           | 0.513                             | 0.0563                                               | 0.504                                                  | -2.0                   |
| Rxn #04 | FTL Plate 4     | F10      | 50           | 0.417                             | 0.0563                                               | 0.504                                                  | 19.4                   |
| Rxn #04 | FTL Plate 4     | G10      | 50           | 0.474                             | 0.0563                                               | 0.504                                                  | 6.7                    |
| Rxn #04 | FTL Plate 4     | H10: FOC | -            | 0.508                             | 0.0563                                               | 0.504                                                  | -0.9                   |
| Rxn #04 | FTL Plate 4     | A11: NFC | -            | 0.065                             | 0.0563                                               | 0.504                                                  | 98.1                   |
| Rxn #04 | FTL Plate 4     | B11      | 50           | 0.500                             | 0.0563                                               | 0.504                                                  | 0.9                    |
| Rxn #04 | FTL Plate 4     | C11      | 50           | 0.507                             | 0.0563                                               | 0.504                                                  | -0.7                   |
| Rxn #04 | FTL Plate 4     | D11      | 50           | 0.501                             | 0.0563                                               | 0.504                                                  | 0.7                    |
| Rxn #04 | FTL Plate 4     | E11      | 50           | 0.398                             | 0.0563                                               | 0.504                                                  | 23.7                   |
| Rxn #04 | FTL Plate 4     | F11      | 50           | 0.502                             | 0.0563                                               | 0.504                                                  | 0.4                    |
| Rxn #04 | FTL Plate 4     | G11      | 50           | 0.486                             | 0.0563                                               | 0.504                                                  | 4.0                    |
| Rxn #04 | FTL Plate 4     | H11: FOC | -            | 0.498                             | 0.0563                                               | 0.504                                                  | 1.3                    |
| Rxn #04 | FTL Plate 4     | A12: NFC | -            | 0.061                             | 0.0563                                               | 0.504                                                  | 99.0                   |
| Rxn #04 | FTL Plate 4     | H12: FOC | -            | 0.495                             | 0.0563                                               | 0.504                                                  | 2.0                    |
| Rxn #05 | FTL Plate 16    | A1: NFC  | -            | 0.062                             | 0.0541                                               | 0.554                                                  | 98.4                   |
| Rxn #05 | FTL Plate 16    | B1       | 50           | 0.545                             | 0.0541                                               | 0.554                                                  | 1.8                    |
| Rxn #05 | FTL Plate 16    | C1       | 50           | 0.511                             | 0.0541                                               | 0.554                                                  | 8.6                    |
| Rxn #05 | FTL Plate 16    | D1       | 50           | 0.561                             | 0.0541                                               | 0.554                                                  | -1.4                   |
| Rxn #05 | FTL Plate 16    | E1       | 50           | 0.543                             | 0.0541                                               | 0.554                                                  | 2.2                    |
| Rxn #05 | FTL Plate 16    | F1       | 50           | 0.526                             | 0.0541                                               | 0.554                                                  | 5.6                    |
| Rxn #05 | FTL Plate 16    | G1       | 50           | 0.524                             | 0.0541                                               | 0.554                                                  | 6.0                    |
| Rxn #05 | FTL Plate 16    | H1: FOC  | -            | 0.534                             | 0.0541                                               | 0.554                                                  | 4.0                    |
| Rxn #05 | FTL Plate 16    | A2: NFC  | -            | 0.052                             | 0.0541                                               | 0.554                                                  | 100.4                  |
| Rxn #05 | FTL Plate 16    | B2       | 50           | 0.566                             | 0.0541                                               | 0.554                                                  | -2.4                   |
| Rxn #05 | FTL Plate 16    | C2       | 50           | 0.569                             | 0.0541                                               | 0.554                                                  | -3.0                   |
| Rxn #05 | FTL Plate 16    | D2       | 50           | 0.554                             | 0.0541                                               | 0.554                                                  | 0.0                    |
| Rxn #05 | FTL Plate 16    | E2       | 50           | 0.529                             | 0.0541                                               | 0.554                                                  | 5.0                    |
| Rxn #05 | FTL Plate 16    | F2       | 50           | 0.562                             | 0.0541                                               | 0.554                                                  | -1.6                   |
| Rxn #05 | FTL Plate 16    | G2       | 50           | 0.546                             | 0.0541                                               | 0.554                                                  | 1.6                    |
| Rxn #05 | FTL Plate 16    | H2: FOC  | -            | 0.562                             | 0.0541                                               | 0.554                                                  | -1.6                   |
| Rxn #05 | FTL Plate 16    | A3: NFC  | -            | 0.058                             | 0.0541                                               | 0.554                                                  | 99.2                   |
| Rxn #05 | FTL Plate 16    | B3       | 50           | 0.552                             | 0.0541                                               | 0.554                                                  | 0.4                    |
| Rxn #05 | FTL Plate 16    | C3       | 50           | 0.560                             | 0.0541                                               | 0.554                                                  | -1.2                   |
| Rxn #05 | FTL Plate 16    | D3       | 50           | 0.565                             | 0.0541                                               | 0.554                                                  | -2.2                   |
| Rxn #05 | FTL Plate 16    | E3       | 50           | 0.557                             | 0.0541                                               | 0.554                                                  | -0.6                   |
| Rxn #05 | FTL Plate 16    | F3       | 50           | 0.545                             | 0.0541                                               | 0.554                                                  | 1.8                    |
| Rxn #05 | FTL Plate 16    | G3       | 50           | 0.536                             | 0.0541                                               | 0.554                                                  | 3.6                    |
| Rxn #05 | FTL Plate 16    | H3: FOC  | -            | 0.577                             | 0.0541                                               | 0.554                                                  | -4.6                   |
| Rxn #05 | FTL Plate 16    | A4: NFC  | -            | 0.064                             | 0.0541                                               | 0.554                                                  | 98.0                   |
| Rxn #05 | FTL Plate 16    | B4       | 50           | 0.562                             | 0.0541                                               | 0.554                                                  | -1.6                   |
| Rxn #05 | FTL Plate 16    | C4       | 50           | 0.511                             | 0.0541                                               | 0.554                                                  | 8.6                    |
| Rxn #05 | FTL Plate 16    | D4       | 50           | 0.549                             | 0.0541                                               | 0.554                                                  | 1.0                    |
| Rxn #05 | FTL Plate 16    | E4       | 50           | 0.511                             | 0.0541                                               | 0.554                                                  | 8.6                    |
| Rxn #05 | FTL Plate 16    | F4       | 50           | 0.541                             | 0.0541                                               | 0.554                                                  | 2.6                    |

**S1 Table. Data from Screening of Botanical Extract Library for Inhibition of KHKC Activity.**

| Rxn ID  | Sample          |          |              | Sample<br>( OD <sub>340nm</sub> ) | Ave. No Fructose Controls<br>( OD <sub>340nm</sub> ) | Ave. Fructose Only Controls<br>( OD <sub>340nm</sub> ) | KHKC<br>Inhibition (%) |
|---------|-----------------|----------|--------------|-----------------------------------|------------------------------------------------------|--------------------------------------------------------|------------------------|
|         | Botanical Plate | Well     | Conc (µg/mL) |                                   |                                                      |                                                        |                        |
| Rxn #05 | FTL Plate 16    | G4       | 50           | 0.491                             | 0.0541                                               | 0.554                                                  | 12.6                   |
| Rxn #05 | FTL Plate 16    | H4: FOC  | -            | 0.553                             | 0.0541                                               | 0.554                                                  | 0.2                    |
| Rxn #05 | FTL Plate 16    | A5: NFC  | -            | 0.060                             | 0.0541                                               | 0.554                                                  | 98.8                   |
| Rxn #05 | FTL Plate 16    | B5: NFC  | -            | 0.047                             | 0.0541                                               | 0.554                                                  | 101.4                  |
| Rxn #05 | FTL Plate 16    | C5: NFC  | -            | 0.044                             | 0.0541                                               | 0.554                                                  | 102.0                  |
| Rxn #05 | FTL Plate 16    | D5: NFC  | -            | 0.045                             | 0.0541                                               | 0.554                                                  | 101.8                  |
| Rxn #05 | FTL Plate 16    | E5: FOC  | -            | 0.550                             | 0.0541                                               | 0.554                                                  | 0.8                    |
| Rxn #05 | FTL Plate 16    | F5: FOC  | -            | 0.549                             | 0.0541                                               | 0.554                                                  | 1.0                    |
| Rxn #05 | FTL Plate 16    | G5: FOC  | -            | 0.568                             | 0.0541                                               | 0.554                                                  | -2.8                   |
| Rxn #05 | FTL Plate 16    | H5: FOC  | -            | 0.545                             | 0.0541                                               | 0.554                                                  | 1.8                    |
| Rxn #05 | FTL Plate 16    | A6: NFC  | -            | 0.059                             | 0.0541                                               | 0.554                                                  | 99.0                   |
| Rxn #05 | FTL Plate 16    | B6       | 50           | 0.611                             | 0.0541                                               | 0.554                                                  | -11.4                  |
| Rxn #05 | FTL Plate 16    | C6       | 50           | 0.571                             | 0.0541                                               | 0.554                                                  | -3.4                   |
| Rxn #05 | FTL Plate 16    | D6       | 50           | 0.581                             | 0.0541                                               | 0.554                                                  | -5.4                   |
| Rxn #05 | FTL Plate 16    | E6       | 50           | 0.462                             | 0.0541                                               | 0.554                                                  | 18.4                   |
| Rxn #05 | FTL Plate 16    | F6       | 50           | 0.558                             | 0.0541                                               | 0.554                                                  | -0.8                   |
| Rxn #05 | FTL Plate 16    | G6       | 50           | 0.540                             | 0.0541                                               | 0.554                                                  | 2.8                    |
| Rxn #05 | FTL Plate 16    | H6: FOC  | -            | 0.567                             | 0.0541                                               | 0.554                                                  | -2.6                   |
| Rxn #05 | FTL Plate 16    | A7: NFC  | -            | 0.044                             | 0.0541                                               | 0.554                                                  | 102.0                  |
| Rxn #05 | FTL Plate 16    | B7       | 50           | 0.563                             | 0.0541                                               | 0.554                                                  | -1.8                   |
| Rxn #05 | FTL Plate 16    | C7       | 50           | 0.583                             | 0.0541                                               | 0.554                                                  | -5.8                   |
| Rxn #05 | FTL Plate 16    | D7       | 50           | 0.542                             | 0.0541                                               | 0.554                                                  | 2.4                    |
| Rxn #05 | FTL Plate 16    | E7       | 50           | 0.546                             | 0.0541                                               | 0.554                                                  | 1.6                    |
| Rxn #05 | FTL Plate 16    | F7       | 50           | 0.520                             | 0.0541                                               | 0.554                                                  | 6.8                    |
| Rxn #05 | FTL Plate 16    | G7       | 50           | 0.533                             | 0.0541                                               | 0.554                                                  | 4.2                    |
| Rxn #05 | FTL Plate 16    | H7: FOC  | -            | 0.556                             | 0.0541                                               | 0.554                                                  | -0.4                   |
| Rxn #05 | FTL Plate 16    | A8: NFC  | -            | 0.045                             | 0.0541                                               | 0.554                                                  | 101.8                  |
| Rxn #05 | FTL Plate 16    | B8       | 50           | 0.567                             | 0.0541                                               | 0.554                                                  | -2.6                   |
| Rxn #05 | FTL Plate 16    | C8       | 50           | 0.558                             | 0.0541                                               | 0.554                                                  | -0.8                   |
| Rxn #05 | FTL Plate 16    | D8       | 50           | 0.580                             | 0.0541                                               | 0.554                                                  | -5.2                   |
| Rxn #05 | FTL Plate 16    | E8       | 50           | 0.547                             | 0.0541                                               | 0.554                                                  | 1.4                    |
| Rxn #05 | FTL Plate 16    | F8       | 50           | 0.531                             | 0.0541                                               | 0.554                                                  | 4.6                    |
| Rxn #05 | FTL Plate 16    | G8       | 50           | 0.569                             | 0.0541                                               | 0.554                                                  | -3.0                   |
| Rxn #05 | FTL Plate 16    | H8: FOC  | -            | 0.557                             | 0.0541                                               | 0.554                                                  | -0.6                   |
| Rxn #05 | FTL Plate 16    | A9: NFC  | -            | 0.056                             | 0.0541                                               | 0.554                                                  | 99.6                   |
| Rxn #05 | FTL Plate 16    | B9       | 50           | 0.609                             | 0.0541                                               | 0.554                                                  | -11.0                  |
| Rxn #05 | FTL Plate 16    | C9       | 50           | 0.549                             | 0.0541                                               | 0.554                                                  | 1.0                    |
| Rxn #05 | FTL Plate 16    | D9       | 50           | 0.565                             | 0.0541                                               | 0.554                                                  | -2.2                   |
| Rxn #05 | FTL Plate 16    | E9       | 50           | 0.545                             | 0.0541                                               | 0.554                                                  | 1.8                    |
| Rxn #05 | FTL Plate 16    | F9       | 50           | 0.551                             | 0.0541                                               | 0.554                                                  | 0.6                    |
| Rxn #05 | FTL Plate 16    | G9       | 50           | 0.555                             | 0.0541                                               | 0.554                                                  | -0.2                   |
| Rxn #05 | FTL Plate 16    | H9: FOC  | -            | 0.561                             | 0.0541                                               | 0.554                                                  | -1.4                   |
| Rxn #05 | FTL Plate 16    | A10: NFC | -            | 0.052                             | 0.0541                                               | 0.554                                                  | 100.4                  |
| Rxn #05 | FTL Plate 16    | B10      | 50           | 0.560                             | 0.0541                                               | 0.554                                                  | -1.2                   |
| Rxn #05 | FTL Plate 16    | C10      | 50           | 0.550                             | 0.0541                                               | 0.554                                                  | 0.8                    |
| Rxn #05 | FTL Plate 16    | D10      | 50           | 0.528                             | 0.0541                                               | 0.554                                                  | 5.2                    |
| Rxn #05 | FTL Plate 16    | E10      | 50           | 0.529                             | 0.0541                                               | 0.554                                                  | 5.0                    |
| Rxn #05 | FTL Plate 16    | F10      | 50           | 0.545                             | 0.0541                                               | 0.554                                                  | 1.8                    |
| Rxn #05 | FTL Plate 16    | G10      | 50           | 0.555                             | 0.0541                                               | 0.554                                                  | -0.2                   |
| Rxn #05 | FTL Plate 16    | H10: FOC | -            | 0.536                             | 0.0541                                               | 0.554                                                  | 3.6                    |
| Rxn #05 | FTL Plate 16    | A11: NFC | -            | 0.065                             | 0.0541                                               | 0.554                                                  | 97.8                   |
| Rxn #05 | FTL Plate 16    | B11      | 50           | 0.563                             | 0.0541                                               | 0.554                                                  | -1.8                   |
| Rxn #05 | FTL Plate 16    | C11      | 50           | 0.576                             | 0.0541                                               | 0.554                                                  | -4.4                   |
| Rxn #05 | FTL Plate 16    | D11      | 50           | 0.555                             | 0.0541                                               | 0.554                                                  | -0.2                   |
| Rxn #05 | FTL Plate 16    | E11      | 50           | 0.549                             | 0.0541                                               | 0.554                                                  | 1.0                    |
| Rxn #05 | FTL Plate 16    | F11      | 50           | 0.548                             | 0.0541                                               | 0.554                                                  | 1.2                    |
| Rxn #05 | FTL Plate 16    | G11      | 50           | 0.539                             | 0.0541                                               | 0.554                                                  | 3.0                    |
| Rxn #05 | FTL Plate 16    | H11: FOC | -            | 0.546                             | 0.0541                                               | 0.554                                                  | 1.6                    |
| Rxn #05 | FTL Plate 16    | A12: NFC | -            | 0.058                             | 0.0541                                               | 0.554                                                  | 99.2                   |
| Rxn #05 | FTL Plate 16    | H12: FOC | -            | 0.542                             | 0.0541                                               | 0.554                                                  | 2.4                    |
| Rxn #06 | FTL Plate 19    | A1: NFC  | -            | 0.043                             | 0.0458                                               | 0.513                                                  | 100.6                  |
| Rxn #06 | FTL Plate 19    | B1       | 50           | 0.543                             | 0.0458                                               | 0.513                                                  | -6.4                   |
| Rxn #06 | FTL Plate 19    | C1       | 50           | 0.523                             | 0.0458                                               | 0.513                                                  | -2.1                   |
| Rxn #06 | FTL Plate 19    | D1       | 50           | 0.451                             | 0.0458                                               | 0.513                                                  | 13.3                   |
| Rxn #06 | FTL Plate 19    | E1       | 50           | 0.445                             | 0.0458                                               | 0.513                                                  | 14.6                   |
| Rxn #06 | FTL Plate 19    | F1       | 50           | 0.449                             | 0.0458                                               | 0.513                                                  | 13.7                   |
| Rxn #06 | FTL Plate 19    | G1       | 50           | 0.423                             | 0.0458                                               | 0.513                                                  | 19.3                   |
| Rxn #06 | FTL Plate 19    | H1: FOC  | -            | 0.495                             | 0.0458                                               | 0.513                                                  | 3.9                    |
| Rxn #06 | FTL Plate 19    | A2: NFC  | -            | 0.054                             | 0.0458                                               | 0.513                                                  | 98.2                   |
| Rxn #06 | FTL Plate 19    | B2       | 50           | 0.492                             | 0.0458                                               | 0.513                                                  | 4.5                    |

**S1 Table. Data from Screening of Botanical Extract Library for Inhibition of KHKC Activity.**

| Rxn ID  | Sample          |          |              | Sample<br>( OD <sub>340nm</sub> ) | Ave. No Fructose Controls<br>( OD <sub>340nm</sub> ) | Ave. Fructose Only Controls<br>( OD <sub>340nm</sub> ) | KHKC<br>Inhibition (%) |
|---------|-----------------|----------|--------------|-----------------------------------|------------------------------------------------------|--------------------------------------------------------|------------------------|
|         | Botanical Plate | Well     | Conc (µg/mL) |                                   |                                                      |                                                        |                        |
| Rxn #06 | FTL Plate 19    | C2       | 50           | 0.492                             | 0.0458                                               | 0.513                                                  | 4.5                    |
| Rxn #06 | FTL Plate 19    | D2       | 50           | 0.524                             | 0.0458                                               | 0.513                                                  | -2.4                   |
| Rxn #06 | FTL Plate 19    | E2       | 50           | 0.531                             | 0.0458                                               | 0.513                                                  | -3.9                   |
| Rxn #06 | FTL Plate 19    | F2       | 50           | 0.485                             | 0.0458                                               | 0.513                                                  | 6.0                    |
| Rxn #06 | FTL Plate 19    | G2       | 50           | 0.483                             | 0.0458                                               | 0.513                                                  | 6.4                    |
| Rxn #06 | FTL Plate 19    | H2: FOC  | -            | 0.520                             | 0.0458                                               | 0.513                                                  | -1.5                   |
| Rxn #06 | FTL Plate 19    | A3: NFC  | -            | 0.044                             | 0.0458                                               | 0.513                                                  | 100.4                  |
| Rxn #06 | FTL Plate 19    | B3       | 50           | 0.530                             | 0.0458                                               | 0.513                                                  | -3.6                   |
| Rxn #06 | FTL Plate 19    | C3       | 50           | 0.537                             | 0.0458                                               | 0.513                                                  | -5.1                   |
| Rxn #06 | FTL Plate 19    | D3       | 50           | 0.501                             | 0.0458                                               | 0.513                                                  | 2.6                    |
| Rxn #06 | FTL Plate 19    | E3       | 50           | 0.532                             | 0.0458                                               | 0.513                                                  | -4.1                   |
| Rxn #06 | FTL Plate 19    | F3       | 50           | 0.496                             | 0.0458                                               | 0.513                                                  | 3.6                    |
| Rxn #06 | FTL Plate 19    | G3       | 50           | 0.491                             | 0.0458                                               | 0.513                                                  | 4.7                    |
| Rxn #06 | FTL Plate 19    | H3: FOC  | -            | 0.509                             | 0.0458                                               | 0.513                                                  | 0.9                    |
| Rxn #06 | FTL Plate 19    | A4: NFC  | -            | 0.045                             | 0.0458                                               | 0.513                                                  | 100.2                  |
| Rxn #06 | FTL Plate 19    | B4       | 50           | 0.499                             | 0.0458                                               | 0.513                                                  | 3.0                    |
| Rxn #06 | FTL Plate 19    | C4       | 50           | 0.488                             | 0.0458                                               | 0.513                                                  | 5.4                    |
| Rxn #06 | FTL Plate 19    | D4       | 50           | 0.486                             | 0.0458                                               | 0.513                                                  | 5.8                    |
| Rxn #06 | FTL Plate 19    | E4       | 50           | 0.486                             | 0.0458                                               | 0.513                                                  | 5.8                    |
| Rxn #06 | FTL Plate 19    | F4       | 50           | 0.455                             | 0.0458                                               | 0.513                                                  | 12.4                   |
| Rxn #06 | FTL Plate 19    | G4       | 50           | 0.475                             | 0.0458                                               | 0.513                                                  | 8.1                    |
| Rxn #06 | FTL Plate 19    | H4: FOC  | -            | 0.509                             | 0.0458                                               | 0.513                                                  | 0.9                    |
| Rxn #06 | FTL Plate 19    | A5: NFC  | -            | 0.044                             | 0.0458                                               | 0.513                                                  | 100.4                  |
| Rxn #06 | FTL Plate 19    | B5: NFC  | -            | 0.046                             | 0.0458                                               | 0.513                                                  | 100.0                  |
| Rxn #06 | FTL Plate 19    | C5: NFC  | -            | 0.039                             | 0.0458                                               | 0.513                                                  | 101.5                  |
| Rxn #06 | FTL Plate 19    | D5: NFC  | -            | 0.044                             | 0.0458                                               | 0.513                                                  | 100.4                  |
| Rxn #06 | FTL Plate 19    | E5: FOC  | -            | 0.531                             | 0.0458                                               | 0.513                                                  | -3.9                   |
| Rxn #06 | FTL Plate 19    | F5: FOC  | -            | 0.524                             | 0.0458                                               | 0.513                                                  | -2.4                   |
| Rxn #06 | FTL Plate 19    | G5: FOC  | -            | 0.523                             | 0.0458                                               | 0.513                                                  | -2.1                   |
| Rxn #06 | FTL Plate 19    | H5: FOC  | -            | 0.517                             | 0.0458                                               | 0.513                                                  | -0.9                   |
| Rxn #06 | FTL Plate 19    | A6: NFC  | -            | 0.038                             | 0.0458                                               | 0.513                                                  | 101.7                  |
| Rxn #06 | FTL Plate 19    | B6       | 50           | 0.484                             | 0.0458                                               | 0.513                                                  | 6.2                    |
| Rxn #06 | FTL Plate 19    | C6       | 50           | 0.459                             | 0.0458                                               | 0.513                                                  | 11.6                   |
| Rxn #06 | FTL Plate 19    | D6       | 50           | 0.475                             | 0.0458                                               | 0.513                                                  | 8.1                    |
| Rxn #06 | FTL Plate 19    | E6       | 50           | 0.507                             | 0.0458                                               | 0.513                                                  | 1.3                    |
| Rxn #06 | FTL Plate 19    | F6       | 50           | 0.499                             | 0.0458                                               | 0.513                                                  | 3.0                    |
| Rxn #06 | FTL Plate 19    | G6       | 50           | 0.505                             | 0.0458                                               | 0.513                                                  | 1.7                    |
| Rxn #06 | FTL Plate 19    | H6: FOC  | -            | 0.502                             | 0.0458                                               | 0.513                                                  | 2.4                    |
| Rxn #06 | FTL Plate 19    | A7: NFC  | -            | 0.054                             | 0.0458                                               | 0.513                                                  | 98.2                   |
| Rxn #06 | FTL Plate 19    | B7       | 50           | 0.492                             | 0.0458                                               | 0.513                                                  | 4.5                    |
| Rxn #06 | FTL Plate 19    | C7       | 50           | 0.504                             | 0.0458                                               | 0.513                                                  | 1.9                    |
| Rxn #06 | FTL Plate 19    | D7       | 50           | 0.497                             | 0.0458                                               | 0.513                                                  | 3.4                    |
| Rxn #06 | FTL Plate 19    | E7       | 50           | 0.490                             | 0.0458                                               | 0.513                                                  | 4.9                    |
| Rxn #06 | FTL Plate 19    | F7       | 50           | 0.501                             | 0.0458                                               | 0.513                                                  | 2.6                    |
| Rxn #06 | FTL Plate 19    | G7       | 50           | 0.513                             | 0.0458                                               | 0.513                                                  | 0.0                    |
| Rxn #06 | FTL Plate 19    | H7: FOC  | -            | 0.520                             | 0.0458                                               | 0.513                                                  | -1.5                   |
| Rxn #06 | FTL Plate 19    | A8: NFC  | -            | 0.052                             | 0.0458                                               | 0.513                                                  | 98.7                   |
| Rxn #06 | FTL Plate 19    | B8       | 50           | 0.505                             | 0.0458                                               | 0.513                                                  | 1.7                    |
| Rxn #06 | FTL Plate 19    | C8       | 50           | 0.528                             | 0.0458                                               | 0.513                                                  | -3.2                   |
| Rxn #06 | FTL Plate 19    | D8       | 50           | 0.518                             | 0.0458                                               | 0.513                                                  | -1.1                   |
| Rxn #06 | FTL Plate 19    | E8       | 50           | 0.511                             | 0.0458                                               | 0.513                                                  | 0.4                    |
| Rxn #06 | FTL Plate 19    | F8       | 50           | 0.499                             | 0.0458                                               | 0.513                                                  | 3.0                    |
| Rxn #06 | FTL Plate 19    | G8       | 50           | 0.462                             | 0.0458                                               | 0.513                                                  | 10.9                   |
| Rxn #06 | FTL Plate 19    | H8: FOC  | -            | 0.513                             | 0.0458                                               | 0.513                                                  | 0.0                    |
| Rxn #06 | FTL Plate 19    | A9: NFC  | -            | 0.046                             | 0.0458                                               | 0.513                                                  | 100.0                  |
| Rxn #06 | FTL Plate 19    | B9       | 50           | 0.478                             | 0.0458                                               | 0.513                                                  | 7.5                    |
| Rxn #06 | FTL Plate 19    | C9       | 50           | 0.458                             | 0.0458                                               | 0.513                                                  | 11.8                   |
| Rxn #06 | FTL Plate 19    | D9       | 50           | 0.435                             | 0.0458                                               | 0.513                                                  | 16.7                   |
| Rxn #06 | FTL Plate 19    | E9       | 50           | 0.446                             | 0.0458                                               | 0.513                                                  | 14.3                   |
| Rxn #06 | FTL Plate 19    | F9       | 50           | 0.469                             | 0.0458                                               | 0.513                                                  | 9.4                    |
| Rxn #06 | FTL Plate 19    | G9       | 50           | 0.467                             | 0.0458                                               | 0.513                                                  | 9.8                    |
| Rxn #06 | FTL Plate 19    | H9: FOC  | -            | 0.518                             | 0.0458                                               | 0.513                                                  | -1.1                   |
| Rxn #06 | FTL Plate 19    | A10: NFC | -            | 0.043                             | 0.0458                                               | 0.513                                                  | 100.6                  |
| Rxn #06 | FTL Plate 19    | B10      | 50           | 0.465                             | 0.0458                                               | 0.513                                                  | 10.3                   |
| Rxn #06 | FTL Plate 19    | C10      | 50           | 0.489                             | 0.0458                                               | 0.513                                                  | 5.1                    |
| Rxn #06 | FTL Plate 19    | D10      | 50           | 0.524                             | 0.0458                                               | 0.513                                                  | -2.4                   |
| Rxn #06 | FTL Plate 19    | E10      | 50           | 0.486                             | 0.0458                                               | 0.513                                                  | 5.8                    |
| Rxn #06 | FTL Plate 19    | F10      | 50           | 0.526                             | 0.0458                                               | 0.513                                                  | -2.8                   |
| Rxn #06 | FTL Plate 19    | G10      | 50           | 0.487                             | 0.0458                                               | 0.513                                                  | 5.6                    |
| Rxn #06 | FTL Plate 19    | H10: FOC | -            | 0.513                             | 0.0458                                               | 0.513                                                  | 0.0                    |

**S1 Table. Data from Screening of Botanical Extract Library for Inhibition of KHKC Activity.**

| Rxn ID  | Sample          |          |              | Sample<br>( OD <sub>340nm</sub> ) | Ave. No Fructose Controls<br>( OD <sub>340nm</sub> ) | Ave. Fructose Only Controls<br>( OD <sub>340nm</sub> ) | KHKC<br>Inhibition (%) |
|---------|-----------------|----------|--------------|-----------------------------------|------------------------------------------------------|--------------------------------------------------------|------------------------|
|         | Botanical Plate | Well     | Conc (µg/mL) |                                   |                                                      |                                                        |                        |
| Rxn #06 | FTL Plate 19    | A11: NFC | -            | 0.047                             | 0.0458                                               | 0.513                                                  | 99.7                   |
| Rxn #06 | FTL Plate 19    | B11      | 50           | 0.507                             | 0.0458                                               | 0.513                                                  | 1.3                    |
| Rxn #06 | FTL Plate 19    | C11      | 50           | 0.502                             | 0.0458                                               | 0.513                                                  | 2.4                    |
| Rxn #06 | FTL Plate 19    | D11      | 50           | 0.511                             | 0.0458                                               | 0.513                                                  | 0.4                    |
| Rxn #06 | FTL Plate 19    | E11      | 50           | 0.501                             | 0.0458                                               | 0.513                                                  | 2.6                    |
| Rxn #06 | FTL Plate 19    | F11      | 50           | 0.501                             | 0.0458                                               | 0.513                                                  | 2.6                    |
| Rxn #06 | FTL Plate 19    | G11      | 50           | 0.521                             | 0.0458                                               | 0.513                                                  | -1.7                   |
| Rxn #06 | FTL Plate 19    | H11: FOC | -            | 0.514                             | 0.0458                                               | 0.513                                                  | -0.2                   |
| Rxn #06 | FTL Plate 19    | A12: NFC | -            | 0.048                             | 0.0458                                               | 0.513                                                  | 99.5                   |
| Rxn #06 | FTL Plate 19    | H12: FOC | -            | 0.490                             | 0.0458                                               | 0.513                                                  | 4.9                    |
| Rxn #07 | FTL Plate 1     | A1: NFC  | -            | 0.063                             | 0.0597                                               | 0.532                                                  | 99.3                   |
| Rxn #07 | FTL Plate 1     | B1       | 50           | 0.441                             | 0.0597                                               | 0.532                                                  | 19.3                   |
| Rxn #07 | FTL Plate 1     | C1       | 50           | 0.511                             | 0.0597                                               | 0.532                                                  | 4.4                    |
| Rxn #07 | FTL Plate 1     | D1       | 50           | 0.426                             | 0.0597                                               | 0.532                                                  | 22.4                   |
| Rxn #07 | FTL Plate 1     | E1       | 50           | 0.539                             | 0.0597                                               | 0.532                                                  | -1.5                   |
| Rxn #07 | FTL Plate 1     | F1       | 50           | 0.479                             | 0.0597                                               | 0.532                                                  | 11.2                   |
| Rxn #07 | FTL Plate 1     | G1       | 50           | 0.473                             | 0.0597                                               | 0.532                                                  | 12.5                   |
| Rxn #07 | FTL Plate 1     | H1: FOC  | -            | 0.534                             | 0.0597                                               | 0.532                                                  | -0.4                   |
| Rxn #07 | FTL Plate 1     | A2: NFC  | -            | 0.065                             | 0.0597                                               | 0.532                                                  | 98.9                   |
| Rxn #07 | FTL Plate 1     | B2       | 50           | 0.553                             | 0.0597                                               | 0.532                                                  | -4.4                   |
| Rxn #07 | FTL Plate 1     | C2       | 50           | 0.452                             | 0.0597                                               | 0.532                                                  | 16.9                   |
| Rxn #07 | FTL Plate 1     | D2       | 50           | 0.525                             | 0.0597                                               | 0.532                                                  | 1.5                    |
| Rxn #07 | FTL Plate 1     | E2       | 50           | 0.490                             | 0.0597                                               | 0.532                                                  | 8.9                    |
| Rxn #07 | FTL Plate 1     | F2       | 50           | 0.415                             | 0.0597                                               | 0.532                                                  | 24.8                   |
| Rxn #07 | FTL Plate 1     | G2       | 50           | 0.519                             | 0.0597                                               | 0.532                                                  | 2.8                    |
| Rxn #07 | FTL Plate 1     | H2: FOC  | -            | 0.500                             | 0.0597                                               | 0.532                                                  | 6.8                    |
| Rxn #07 | FTL Plate 1     | A3: NFC  | -            | 0.065                             | 0.0597                                               | 0.532                                                  | 98.9                   |
| Rxn #07 | FTL Plate 1     | B3       | 50           | 0.521                             | 0.0597                                               | 0.532                                                  | 2.3                    |
| Rxn #07 | FTL Plate 1     | C3       | 50           | 0.557                             | 0.0597                                               | 0.532                                                  | -5.3                   |
| Rxn #07 | FTL Plate 1     | D3       | 50           | 0.541                             | 0.0597                                               | 0.532                                                  | -1.9                   |
| Rxn #07 | FTL Plate 1     | E3       | 50           | 0.385                             | 0.0597                                               | 0.532                                                  | 31.1                   |
| Rxn #07 | FTL Plate 1     | F3       | 50           | 0.523                             | 0.0597                                               | 0.532                                                  | 1.9                    |
| Rxn #07 | FTL Plate 1     | G3       | 50           | 0.487                             | 0.0597                                               | 0.532                                                  | 9.5                    |
| Rxn #07 | FTL Plate 1     | H3: FOC  | -            | 0.548                             | 0.0597                                               | 0.532                                                  | -3.4                   |
| Rxn #07 | FTL Plate 1     | A4: NFC  | -            | 0.069                             | 0.0597                                               | 0.532                                                  | 98.0                   |
| Rxn #07 | FTL Plate 1     | B4       | 50           | 0.577                             | 0.0597                                               | 0.532                                                  | -9.5                   |
| Rxn #07 | FTL Plate 1     | C4       | 50           | 0.578                             | 0.0597                                               | 0.532                                                  | -9.7                   |
| Rxn #07 | FTL Plate 1     | D4       | 50           | 0.545                             | 0.0597                                               | 0.532                                                  | -2.8                   |
| Rxn #07 | FTL Plate 1     | E4       | 50           | 0.499                             | 0.0597                                               | 0.532                                                  | 7.0                    |
| Rxn #07 | FTL Plate 1     | F4       | 50           | 0.567                             | 0.0597                                               | 0.532                                                  | -7.4                   |
| Rxn #07 | FTL Plate 1     | G4       | 50           | 0.555                             | 0.0597                                               | 0.532                                                  | -4.9                   |
| Rxn #07 | FTL Plate 1     | H4: FOC  | -            | 0.562                             | 0.0597                                               | 0.532                                                  | -6.4                   |
| Rxn #07 | FTL Plate 1     | A5: NFC  | -            | 0.061                             | 0.0597                                               | 0.532                                                  | 99.7                   |
| Rxn #07 | FTL Plate 1     | B5: NFC  | -            | 0.057                             | 0.0597                                               | 0.532                                                  | 100.6                  |
| Rxn #07 | FTL Plate 1     | C5: NFC  | -            | 0.046                             | 0.0597                                               | 0.532                                                  | 102.9                  |
| Rxn #07 | FTL Plate 1     | D5: NFC  | -            | 0.046                             | 0.0597                                               | 0.532                                                  | 102.9                  |
| Rxn #07 | FTL Plate 1     | E5: FOC  | -            | 0.420                             | 0.0597                                               | 0.532                                                  | 23.7                   |
| Rxn #07 | FTL Plate 1     | F5: FOC  | -            | 0.555                             | 0.0597                                               | 0.532                                                  | -4.9                   |
| Rxn #07 | FTL Plate 1     | G5: FOC  | -            | 0.553                             | 0.0597                                               | 0.532                                                  | -4.4                   |
| Rxn #07 | FTL Plate 1     | H5: FOC  | -            | 0.552                             | 0.0597                                               | 0.532                                                  | -4.2                   |
| Rxn #07 | FTL Plate 1     | A6: NFC  | -            | 0.059                             | 0.0597                                               | 0.532                                                  | 100.1                  |
| Rxn #07 | FTL Plate 1     | B6       | 50           | 0.545                             | 0.0597                                               | 0.532                                                  | -2.8                   |
| Rxn #07 | FTL Plate 1     | C6       | 50           | 0.544                             | 0.0597                                               | 0.532                                                  | -2.5                   |
| Rxn #07 | FTL Plate 1     | D6       | 50           | 0.534                             | 0.0597                                               | 0.532                                                  | -0.4                   |
| Rxn #07 | FTL Plate 1     | E6       | 50           | 0.496                             | 0.0597                                               | 0.532                                                  | 7.6                    |
| Rxn #07 | FTL Plate 1     | F6       | 50           | 0.434                             | 0.0597                                               | 0.532                                                  | 20.7                   |
| Rxn #07 | FTL Plate 1     | G6       | 50           | 0.488                             | 0.0597                                               | 0.532                                                  | 9.3                    |
| Rxn #07 | FTL Plate 1     | H6: FOC  | -            | 0.533                             | 0.0597                                               | 0.532                                                  | -0.2                   |
| Rxn #07 | FTL Plate 1     | A7: NFC  | -            | 0.053                             | 0.0597                                               | 0.532                                                  | 101.4                  |
| Rxn #07 | FTL Plate 1     | B7       | 50           | 0.553                             | 0.0597                                               | 0.532                                                  | -4.4                   |
| Rxn #07 | FTL Plate 1     | C7       | 50           | 0.544                             | 0.0597                                               | 0.532                                                  | -2.5                   |
| Rxn #07 | FTL Plate 1     | D7       | 50           | 0.572                             | 0.0597                                               | 0.532                                                  | -8.5                   |
| Rxn #07 | FTL Plate 1     | E7       | 50           | 0.384                             | 0.0597                                               | 0.532                                                  | 31.3                   |
| Rxn #07 | FTL Plate 1     | F7       | 50           | 0.554                             | 0.0597                                               | 0.532                                                  | -4.7                   |
| Rxn #07 | FTL Plate 1     | G7       | 50           | 0.554                             | 0.0597                                               | 0.532                                                  | -4.7                   |
| Rxn #07 | FTL Plate 1     | H7: FOC  | -            | 0.560                             | 0.0597                                               | 0.532                                                  | -5.9                   |
| Rxn #07 | FTL Plate 1     | A8: NFC  | -            | 0.074                             | 0.0597                                               | 0.532                                                  | 97.0                   |
| Rxn #07 | FTL Plate 1     | B8       | 50           | 0.558                             | 0.0597                                               | 0.532                                                  | -5.5                   |
| Rxn #07 | FTL Plate 1     | C8       | 50           | 0.561                             | 0.0597                                               | 0.532                                                  | -6.1                   |
| Rxn #07 | FTL Plate 1     | D8       | 50           | 0.560                             | 0.0597                                               | 0.532                                                  | -5.9                   |

**S1 Table. Data from Screening of Botanical Extract Library for Inhibition of KHKC Activity.**

| Rxn ID  | Sample          |          |              | Sample<br>( OD <sub>340nm</sub> ) | Ave. No Fructose Controls<br>( OD <sub>340nm</sub> ) | Ave. Fructose Only Controls<br>( OD <sub>340nm</sub> ) | KHKC<br>Inhibition (%) |
|---------|-----------------|----------|--------------|-----------------------------------|------------------------------------------------------|--------------------------------------------------------|------------------------|
|         | Botanical Plate | Well     | Conc (µg/mL) |                                   |                                                      |                                                        |                        |
| Rxn #07 | FTL Plate 1     | E8       | 50           | 0.505                             | 0.0597                                               | 0.532                                                  | 5.7                    |
| Rxn #07 | FTL Plate 1     | F8       | 50           | 0.583                             | 0.0597                                               | 0.532                                                  | -10.8                  |
| Rxn #07 | FTL Plate 1     | G8       | 50           | 0.495                             | 0.0597                                               | 0.532                                                  | 7.8                    |
| Rxn #07 | FTL Plate 1     | H8: FOC  | -            | 0.576                             | 0.0597                                               | 0.532                                                  | -9.3                   |
| Rxn #07 | FTL Plate 1     | A9: NFC  | -            | 0.059                             | 0.0597                                               | 0.532                                                  | 100.1                  |
| Rxn #07 | FTL Plate 1     | B9       | 50           | 0.539                             | 0.0597                                               | 0.532                                                  | -1.5                   |
| Rxn #07 | FTL Plate 1     | C9       | 50           | 0.507                             | 0.0597                                               | 0.532                                                  | 5.3                    |
| Rxn #07 | FTL Plate 1     | D9       | 50           | 0.528                             | 0.0597                                               | 0.532                                                  | 0.8                    |
| Rxn #07 | FTL Plate 1     | E9       | 50           | 0.515                             | 0.0597                                               | 0.532                                                  | 3.6                    |
| Rxn #07 | FTL Plate 1     | F9       | 50           | 0.499                             | 0.0597                                               | 0.532                                                  | 7.0                    |
| Rxn #07 | FTL Plate 1     | G9       | 50           | 0.531                             | 0.0597                                               | 0.532                                                  | 0.2                    |
| Rxn #07 | FTL Plate 1     | H9: FOC  | -            | 0.497                             | 0.0597                                               | 0.532                                                  | 7.4                    |
| Rxn #07 | FTL Plate 1     | A10: NFC | -            | 0.056                             | 0.0597                                               | 0.532                                                  | 100.8                  |
| Rxn #07 | FTL Plate 1     | B10      | 50           | 0.540                             | 0.0597                                               | 0.532                                                  | -1.7                   |
| Rxn #07 | FTL Plate 1     | C10      | 50           | 0.548                             | 0.0597                                               | 0.532                                                  | -3.4                   |
| Rxn #07 | FTL Plate 1     | D10      | 50           | 0.561                             | 0.0597                                               | 0.532                                                  | -6.1                   |
| Rxn #07 | FTL Plate 1     | E10      | 50           | 0.539                             | 0.0597                                               | 0.532                                                  | -1.5                   |
| Rxn #07 | FTL Plate 1     | F10      | 50           | 0.543                             | 0.0597                                               | 0.532                                                  | -2.3                   |
| Rxn #07 | FTL Plate 1     | G10      | 50           | 0.510                             | 0.0597                                               | 0.532                                                  | 4.7                    |
| Rxn #07 | FTL Plate 1     | H10: FOC | -            | 0.517                             | 0.0597                                               | 0.532                                                  | 3.2                    |
| Rxn #07 | FTL Plate 1     | A11: NFC | -            | 0.058                             | 0.0597                                               | 0.532                                                  | 100.4                  |
| Rxn #07 | FTL Plate 1     | B11      | 50           | 0.527                             | 0.0597                                               | 0.532                                                  | 1.1                    |
| Rxn #07 | FTL Plate 1     | C11      | 50           | 0.555                             | 0.0597                                               | 0.532                                                  | -4.9                   |
| Rxn #07 | FTL Plate 1     | D11      | 50           | 0.575                             | 0.0597                                               | 0.532                                                  | -9.1                   |
| Rxn #07 | FTL Plate 1     | E11      | 50           | 0.571                             | 0.0597                                               | 0.532                                                  | -8.3                   |
| Rxn #07 | FTL Plate 1     | F11      | 50           | 0.545                             | 0.0597                                               | 0.532                                                  | -2.8                   |
| Rxn #07 | FTL Plate 1     | G11      | 50           | 0.533                             | 0.0597                                               | 0.532                                                  | -0.2                   |
| Rxn #07 | FTL Plate 1     | H11: FOC | -            | 0.539                             | 0.0597                                               | 0.532                                                  | -1.5                   |
| Rxn #07 | FTL Plate 1     | A12: NFC | -            | 0.064                             | 0.0597                                               | 0.532                                                  | 99.1                   |
| Rxn #07 | FTL Plate 1     | H12: FOC | -            | 0.527                             | 0.0597                                               | 0.532                                                  | 1.1                    |
| Rxn #08 | FTL Plate 13    | A1: NFC  | -            | 0.056                             | 0.0487                                               | 0.505                                                  | 98.4                   |
| Rxn #08 | FTL Plate 13    | B1       | 50           | 0.495                             | 0.0487                                               | 0.505                                                  | 2.2                    |
| Rxn #08 | FTL Plate 13    | C1       | 50           | 0.477                             | 0.0487                                               | 0.505                                                  | 6.1                    |
| Rxn #08 | FTL Plate 13    | D1       | 50           | 0.495                             | 0.0487                                               | 0.505                                                  | 2.2                    |
| Rxn #08 | FTL Plate 13    | E1       | 50           | 0.479                             | 0.0487                                               | 0.505                                                  | 5.7                    |
| Rxn #08 | FTL Plate 13    | F1       | 50           | 0.480                             | 0.0487                                               | 0.505                                                  | 5.5                    |
| Rxn #08 | FTL Plate 13    | G1       | 50           | 0.471                             | 0.0487                                               | 0.505                                                  | 7.5                    |
| Rxn #08 | FTL Plate 13    | H1: FOC  | -            | 0.493                             | 0.0487                                               | 0.505                                                  | 2.6                    |
| Rxn #08 | FTL Plate 13    | A2: NFC  | -            | 0.062                             | 0.0487                                               | 0.505                                                  | 97.1                   |
| Rxn #08 | FTL Plate 13    | B2       | 50           | 0.507                             | 0.0487                                               | 0.505                                                  | -0.4                   |
| Rxn #08 | FTL Plate 13    | C2       | 50           | 0.526                             | 0.0487                                               | 0.505                                                  | -4.6                   |
| Rxn #08 | FTL Plate 13    | D2       | 50           | 0.500                             | 0.0487                                               | 0.505                                                  | 1.1                    |
| Rxn #08 | FTL Plate 13    | E2       | 50           | 0.516                             | 0.0487                                               | 0.505                                                  | -2.4                   |
| Rxn #08 | FTL Plate 13    | F2       | 50           | 0.507                             | 0.0487                                               | 0.505                                                  | -0.4                   |
| Rxn #08 | FTL Plate 13    | G2       | 50           | 0.498                             | 0.0487                                               | 0.505                                                  | 1.5                    |
| Rxn #08 | FTL Plate 13    | H2: FOC  | -            | 0.512                             | 0.0487                                               | 0.505                                                  | -1.5                   |
| Rxn #08 | FTL Plate 13    | A3: NFC  | -            | 0.044                             | 0.0487                                               | 0.505                                                  | 101.0                  |
| Rxn #08 | FTL Plate 13    | B3       | 50           | 0.509                             | 0.0487                                               | 0.505                                                  | -0.9                   |
| Rxn #08 | FTL Plate 13    | C3       | 50           | 0.528                             | 0.0487                                               | 0.505                                                  | -5.0                   |
| Rxn #08 | FTL Plate 13    | D3       | 50           | 0.516                             | 0.0487                                               | 0.505                                                  | -2.4                   |
| Rxn #08 | FTL Plate 13    | E3       | 50           | 0.488                             | 0.0487                                               | 0.505                                                  | 3.7                    |
| Rxn #08 | FTL Plate 13    | F3       | 50           | 0.498                             | 0.0487                                               | 0.505                                                  | 1.5                    |
| Rxn #08 | FTL Plate 13    | G3       | 50           | 0.501                             | 0.0487                                               | 0.505                                                  | 0.9                    |
| Rxn #08 | FTL Plate 13    | H3: FOC  | -            | 0.506                             | 0.0487                                               | 0.505                                                  | -0.2                   |
| Rxn #08 | FTL Plate 13    | A4: NFC  | -            | 0.047                             | 0.0487                                               | 0.505                                                  | 100.4                  |
| Rxn #08 | FTL Plate 13    | B4       | 50           | 0.505                             | 0.0487                                               | 0.505                                                  | 0.0                    |
| Rxn #08 | FTL Plate 13    | C4       | 50           | 0.501                             | 0.0487                                               | 0.505                                                  | 0.9                    |
| Rxn #08 | FTL Plate 13    | D4       | 50           | 0.513                             | 0.0487                                               | 0.505                                                  | -1.8                   |
| Rxn #08 | FTL Plate 13    | E4       | 50           | 0.460                             | 0.0487                                               | 0.505                                                  | 9.9                    |
| Rxn #08 | FTL Plate 13    | F4       | 50           | 0.490                             | 0.0487                                               | 0.505                                                  | 3.3                    |
| Rxn #08 | FTL Plate 13    | G4       | 50           | 0.463                             | 0.0487                                               | 0.505                                                  | 9.2                    |
| Rxn #08 | FTL Plate 13    | H4: FOC  | -            | 0.509                             | 0.0487                                               | 0.505                                                  | -0.9                   |
| Rxn #08 | FTL Plate 13    | A5: NFC  | -            | 0.053                             | 0.0487                                               | 0.505                                                  | 99.1                   |
| Rxn #08 | FTL Plate 13    | B5: NFC  | -            | 0.041                             | 0.0487                                               | 0.505                                                  | 101.7                  |
| Rxn #08 | FTL Plate 13    | C5: NFC  | -            | 0.038                             | 0.0487                                               | 0.505                                                  | 102.3                  |
| Rxn #08 | FTL Plate 13    | D5: NFC  | -            | 0.036                             | 0.0487                                               | 0.505                                                  | 102.8                  |
| Rxn #08 | FTL Plate 13    | E5: FOC  | -            | 0.507                             | 0.0487                                               | 0.505                                                  | -0.4                   |
| Rxn #08 | FTL Plate 13    | F5: FOC  | -            | 0.496                             | 0.0487                                               | 0.505                                                  | 2.0                    |
| Rxn #08 | FTL Plate 13    | G5: FOC  | -            | 0.500                             | 0.0487                                               | 0.505                                                  | 1.1                    |
| Rxn #08 | FTL Plate 13    | H5: FOC  | -            | 0.508                             | 0.0487                                               | 0.505                                                  | -0.7                   |

**S1 Table. Data from Screening of Botanical Extract Library for Inhibition of KHKC Activity.**

| Rxn ID  | Sample          |          |              | Sample<br>( OD <sub>340nm</sub> ) | Ave. No Fructose Controls<br>( OD <sub>340nm</sub> ) | Ave. Fructose Only Controls<br>( OD <sub>340nm</sub> ) | KHKC<br>Inhibition (%) |
|---------|-----------------|----------|--------------|-----------------------------------|------------------------------------------------------|--------------------------------------------------------|------------------------|
|         | Botanical Plate | Well     | Conc (µg/mL) |                                   |                                                      |                                                        |                        |
| Rxn #08 | FTL Plate 13    | A6: NFC  | -            | 0.046                             | 0.0487                                               | 0.505                                                  | 100.6                  |
| Rxn #08 | FTL Plate 13    | B6       | 50           | 0.524                             | 0.0487                                               | 0.505                                                  | -4.2                   |
| Rxn #08 | FTL Plate 13    | C6       | 50           | 0.512                             | 0.0487                                               | 0.505                                                  | -1.5                   |
| Rxn #08 | FTL Plate 13    | D6       | 50           | 0.500                             | 0.0487                                               | 0.505                                                  | 1.1                    |
| Rxn #08 | FTL Plate 13    | E6       | 50           | 0.505                             | 0.0487                                               | 0.505                                                  | 0.0                    |
| Rxn #08 | FTL Plate 13    | F6       | 50           | 0.481                             | 0.0487                                               | 0.505                                                  | 5.3                    |
| Rxn #08 | FTL Plate 13    | G6       | 50           | 0.516                             | 0.0487                                               | 0.505                                                  | -2.4                   |
| Rxn #08 | FTL Plate 13    | H6: FOC  | -            | 0.505                             | 0.0487                                               | 0.505                                                  | 0.0                    |
| Rxn #08 | FTL Plate 13    | A7: NFC  | -            | 0.045                             | 0.0487                                               | 0.505                                                  | 100.8                  |
| Rxn #08 | FTL Plate 13    | B7       | 50           | 0.531                             | 0.0487                                               | 0.505                                                  | -5.7                   |
| Rxn #08 | FTL Plate 13    | C7       | 50           | 0.512                             | 0.0487                                               | 0.505                                                  | -1.5                   |
| Rxn #08 | FTL Plate 13    | D7       | 50           | 0.522                             | 0.0487                                               | 0.505                                                  | -3.7                   |
| Rxn #08 | FTL Plate 13    | E7       | 50           | 0.528                             | 0.0487                                               | 0.505                                                  | -5.0                   |
| Rxn #08 | FTL Plate 13    | F7       | 50           | 0.519                             | 0.0487                                               | 0.505                                                  | -3.1                   |
| Rxn #08 | FTL Plate 13    | G7       | 50           | 0.510                             | 0.0487                                               | 0.505                                                  | -1.1                   |
| Rxn #08 | FTL Plate 13    | H7: FOC  | -            | 0.502                             | 0.0487                                               | 0.505                                                  | 0.7                    |
| Rxn #08 | FTL Plate 13    | A8: NFC  | -            | 0.048                             | 0.0487                                               | 0.505                                                  | 100.2                  |
| Rxn #08 | FTL Plate 13    | B8       | 50           | 0.497                             | 0.0487                                               | 0.505                                                  | 1.8                    |
| Rxn #08 | FTL Plate 13    | C8       | 50           | 0.509                             | 0.0487                                               | 0.505                                                  | -0.9                   |
| Rxn #08 | FTL Plate 13    | D8       | 50           | 0.510                             | 0.0487                                               | 0.505                                                  | -1.1                   |
| Rxn #08 | FTL Plate 13    | E8       | 50           | 0.508                             | 0.0487                                               | 0.505                                                  | -0.7                   |
| Rxn #08 | FTL Plate 13    | F8       | 50           | 0.520                             | 0.0487                                               | 0.505                                                  | -3.3                   |
| Rxn #08 | FTL Plate 13    | G8       | 50           | 0.520                             | 0.0487                                               | 0.505                                                  | -3.3                   |
| Rxn #08 | FTL Plate 13    | H8: FOC  | -            | 0.502                             | 0.0487                                               | 0.505                                                  | 0.7                    |
| Rxn #08 | FTL Plate 13    | A9: NFC  | -            | 0.059                             | 0.0487                                               | 0.505                                                  | 97.7                   |
| Rxn #08 | FTL Plate 13    | B9       | 50           | 0.518                             | 0.0487                                               | 0.505                                                  | -2.8                   |
| Rxn #08 | FTL Plate 13    | C9       | 50           | 0.495                             | 0.0487                                               | 0.505                                                  | 2.2                    |
| Rxn #08 | FTL Plate 13    | D9       | 50           | 0.473                             | 0.0487                                               | 0.505                                                  | 7.0                    |
| Rxn #08 | FTL Plate 13    | E9       | 50           | 0.510                             | 0.0487                                               | 0.505                                                  | -1.1                   |
| Rxn #08 | FTL Plate 13    | F9       | 50           | 0.462                             | 0.0487                                               | 0.505                                                  | 9.4                    |
| Rxn #08 | FTL Plate 13    | G9       | 50           | 0.512                             | 0.0487                                               | 0.505                                                  | -1.5                   |
| Rxn #08 | FTL Plate 13    | H9: FOC  | -            | 0.515                             | 0.0487                                               | 0.505                                                  | -2.2                   |
| Rxn #08 | FTL Plate 13    | A10: NFC | -            | 0.051                             | 0.0487                                               | 0.505                                                  | 99.5                   |
| Rxn #08 | FTL Plate 13    | B10      | 50           | 0.505                             | 0.0487                                               | 0.505                                                  | 0.0                    |
| Rxn #08 | FTL Plate 13    | C10      | 50           | 0.499                             | 0.0487                                               | 0.505                                                  | 1.3                    |
| Rxn #08 | FTL Plate 13    | D10      | 50           | 0.490                             | 0.0487                                               | 0.505                                                  | 3.3                    |
| Rxn #08 | FTL Plate 13    | E10      | 50           | 0.471                             | 0.0487                                               | 0.505                                                  | 7.5                    |
| Rxn #08 | FTL Plate 13    | F10      | 50           | 0.508                             | 0.0487                                               | 0.505                                                  | -0.7                   |
| Rxn #08 | FTL Plate 13    | G10      | 50           | 0.481                             | 0.0487                                               | 0.505                                                  | 5.3                    |
| Rxn #08 | FTL Plate 13    | H10: FOC | -            | 0.507                             | 0.0487                                               | 0.505                                                  | -0.4                   |
| Rxn #08 | FTL Plate 13    | A11: NFC | -            | 0.048                             | 0.0487                                               | 0.505                                                  | 100.2                  |
| Rxn #08 | FTL Plate 13    | B11      | 50           | 0.503                             | 0.0487                                               | 0.505                                                  | 0.4                    |
| Rxn #08 | FTL Plate 13    | C11      | 50           | 0.509                             | 0.0487                                               | 0.505                                                  | -0.9                   |
| Rxn #08 | FTL Plate 13    | D11      | 50           | 0.497                             | 0.0487                                               | 0.505                                                  | 1.8                    |
| Rxn #08 | FTL Plate 13    | E11      | 50           | 0.501                             | 0.0487                                               | 0.505                                                  | 0.9                    |
| Rxn #08 | FTL Plate 13    | F11      | 50           | 0.491                             | 0.0487                                               | 0.505                                                  | 3.1                    |
| Rxn #08 | FTL Plate 13    | G11      | 50           | 0.477                             | 0.0487                                               | 0.505                                                  | 6.1                    |
| Rxn #08 | FTL Plate 13    | H11: FOC | -            | 0.502                             | 0.0487                                               | 0.505                                                  | 0.7                    |
| Rxn #08 | FTL Plate 13    | A12: NFC | -            | 0.056                             | 0.0487                                               | 0.505                                                  | 98.4                   |
| Rxn #08 | FTL Plate 13    | H12: FOC | -            | 0.506                             | 0.0487                                               | 0.505                                                  | -0.2                   |
| Rxn #09 | FTL Plate 14    | A1: NFC  | -            | 0.045                             | 0.0423                                               | 0.479                                                  | 99.4                   |
| Rxn #09 | FTL Plate 14    | B1       | 50           | 0.493                             | 0.0423                                               | 0.479                                                  | -3.2                   |
| Rxn #09 | FTL Plate 14    | C1       | 50           | 0.478                             | 0.0423                                               | 0.479                                                  | 0.2                    |
| Rxn #09 | FTL Plate 14    | D1       | 50           | 0.500                             | 0.0423                                               | 0.479                                                  | -4.8                   |
| Rxn #09 | FTL Plate 14    | E1       | 50           | 0.495                             | 0.0423                                               | 0.479                                                  | -3.7                   |
| Rxn #09 | FTL Plate 14    | F1       | 50           | 0.473                             | 0.0423                                               | 0.479                                                  | 1.4                    |
| Rxn #09 | FTL Plate 14    | G1       | 50           | 0.498                             | 0.0423                                               | 0.479                                                  | -4.4                   |
| Rxn #09 | FTL Plate 14    | H1: FOC  | -            | 0.437                             | 0.0423                                               | 0.479                                                  | 9.6                    |
| Rxn #09 | FTL Plate 14    | A2: NFC  | -            | 0.039                             | 0.0423                                               | 0.479                                                  | 100.8                  |
| Rxn #09 | FTL Plate 14    | B2       | 50           | 0.550                             | 0.0423                                               | 0.479                                                  | -16.3                  |
| Rxn #09 | FTL Plate 14    | C2       | 50           | 0.535                             | 0.0423                                               | 0.479                                                  | -12.8                  |
| Rxn #09 | FTL Plate 14    | D2       | 50           | 0.500                             | 0.0423                                               | 0.479                                                  | -4.8                   |
| Rxn #09 | FTL Plate 14    | E2       | 50           | 0.519                             | 0.0423                                               | 0.479                                                  | -9.2                   |
| Rxn #09 | FTL Plate 14    | F2       | 50           | 0.513                             | 0.0423                                               | 0.479                                                  | -7.8                   |
| Rxn #09 | FTL Plate 14    | G2       | 50           | 0.491                             | 0.0423                                               | 0.479                                                  | -2.7                   |
| Rxn #09 | FTL Plate 14    | H2: FOC  | -            | 0.462                             | 0.0423                                               | 0.479                                                  | 3.9                    |
| Rxn #09 | FTL Plate 14    | A3: NFC  | -            | 0.039                             | 0.0423                                               | 0.479                                                  | 100.8                  |
| Rxn #09 | FTL Plate 14    | B3       | 50           | 0.504                             | 0.0423                                               | 0.479                                                  | -5.7                   |
| Rxn #09 | FTL Plate 14    | C3       | 50           | 0.520                             | 0.0423                                               | 0.479                                                  | -9.4                   |
| Rxn #09 | FTL Plate 14    | D3       | 50           | 0.530                             | 0.0423                                               | 0.479                                                  | -11.7                  |



**S1 Table. Data from Screening of Botanical Extract Library for Inhibition of KHKC Activity.**

| Rxn ID  | Sample          |          |              | Sample<br>( OD <sub>340nm</sub> ) | Ave. No Fructose Controls<br>( OD <sub>340nm</sub> ) | Ave. Fructose Only Controls<br>( OD <sub>340nm</sub> ) | KHKC<br>Inhibition (%) |
|---------|-----------------|----------|--------------|-----------------------------------|------------------------------------------------------|--------------------------------------------------------|------------------------|
|         | Botanical Plate | Well     | Conc (µg/mL) |                                   |                                                      |                                                        |                        |
| Rxn #09 | FTL Plate 14    | E3       | 50           | 0.501                             | 0.0423                                               | 0.479                                                  | -5.0                   |
| Rxn #09 | FTL Plate 14    | F3       | 50           | 0.512                             | 0.0423                                               | 0.479                                                  | -7.6                   |
| Rxn #09 | FTL Plate 14    | G3       | 50           | 0.518                             | 0.0423                                               | 0.479                                                  | -8.9                   |
| Rxn #09 | FTL Plate 14    | H3: FOC  | -            | 0.474                             | 0.0423                                               | 0.479                                                  | 1.1                    |
| Rxn #09 | FTL Plate 14    | A4: NFC  | -            | 0.041                             | 0.0423                                               | 0.479                                                  | 100.3                  |
| Rxn #09 | FTL Plate 14    | B4       | 50           | 0.534                             | 0.0423                                               | 0.479                                                  | -12.6                  |
| Rxn #09 | FTL Plate 14    | C4       | 50           | 0.526                             | 0.0423                                               | 0.479                                                  | -10.8                  |
| Rxn #09 | FTL Plate 14    | D4       | 50           | 0.512                             | 0.0423                                               | 0.479                                                  | -7.6                   |
| Rxn #09 | FTL Plate 14    | E4       | 50           | 0.501                             | 0.0423                                               | 0.479                                                  | -5.0                   |
| Rxn #09 | FTL Plate 14    | F4       | 50           | 0.515                             | 0.0423                                               | 0.479                                                  | -8.2                   |
| Rxn #09 | FTL Plate 14    | G4       | 50           | 0.496                             | 0.0423                                               | 0.479                                                  | -3.9                   |
| Rxn #09 | FTL Plate 14    | H4: FOC  | -            | 0.459                             | 0.0423                                               | 0.479                                                  | 4.6                    |
| Rxn #09 | FTL Plate 14    | A5: NFC  | -            | 0.046                             | 0.0423                                               | 0.479                                                  | 99.2                   |
| Rxn #09 | FTL Plate 14    | B5: NFC  | -            | 0.037                             | 0.0423                                               | 0.479                                                  | 101.2                  |
| Rxn #09 | FTL Plate 14    | C5: NFC  | -            | 0.039                             | 0.0423                                               | 0.479                                                  | 100.8                  |
| Rxn #09 | FTL Plate 14    | D5: NFC  | -            | 0.037                             | 0.0423                                               | 0.479                                                  | 101.2                  |
| Rxn #09 | FTL Plate 14    | E5: FOC  | -            | 0.526                             | 0.0423                                               | 0.479                                                  | -10.8                  |
| Rxn #09 | FTL Plate 14    | F5: FOC  | -            | 0.513                             | 0.0423                                               | 0.479                                                  | -7.8                   |
| Rxn #09 | FTL Plate 14    | G5: FOC  | -            | 0.512                             | 0.0423                                               | 0.479                                                  | -7.6                   |
| Rxn #09 | FTL Plate 14    | H5: FOC  | -            | 0.467                             | 0.0423                                               | 0.479                                                  | 2.7                    |
| Rxn #09 | FTL Plate 14    | A6: NFC  | -            | 0.040                             | 0.0423                                               | 0.479                                                  | 100.5                  |
| Rxn #09 | FTL Plate 14    | B6       | 50           | 0.531                             | 0.0423                                               | 0.479                                                  | -11.9                  |
| Rxn #09 | FTL Plate 14    | C6       | 50           | 0.504                             | 0.0423                                               | 0.479                                                  | -5.7                   |
| Rxn #09 | FTL Plate 14    | D6       | 50           | 0.525                             | 0.0423                                               | 0.479                                                  | -10.5                  |
| Rxn #09 | FTL Plate 14    | E6       | 50           | 0.517                             | 0.0423                                               | 0.479                                                  | -8.7                   |
| Rxn #09 | FTL Plate 14    | F6       | 50           | 0.505                             | 0.0423                                               | 0.479                                                  | -6.0                   |
| Rxn #09 | FTL Plate 14    | G6       | 50           | 0.526                             | 0.0423                                               | 0.479                                                  | -10.8                  |
| Rxn #09 | FTL Plate 14    | H6: FOC  | -            | 0.472                             | 0.0423                                               | 0.479                                                  | 1.6                    |
| Rxn #09 | FTL Plate 14    | A7: NFC  | -            | 0.041                             | 0.0423                                               | 0.479                                                  | 100.3                  |
| Rxn #09 | FTL Plate 14    | B7       | 50           | 0.530                             | 0.0423                                               | 0.479                                                  | -11.7                  |
| Rxn #09 | FTL Plate 14    | C7       | 50           | 0.535                             | 0.0423                                               | 0.479                                                  | -12.8                  |
| Rxn #09 | FTL Plate 14    | D7       | 50           | 0.487                             | 0.0423                                               | 0.479                                                  | -1.8                   |
| Rxn #09 | FTL Plate 14    | E7       | 50           | 0.489                             | 0.0423                                               | 0.479                                                  | -2.3                   |
| Rxn #09 | FTL Plate 14    | F7       | 50           | 0.528                             | 0.0423                                               | 0.479                                                  | -11.2                  |
| Rxn #09 | FTL Plate 14    | G7       | 50           | 0.489                             | 0.0423                                               | 0.479                                                  | -2.3                   |
| Rxn #09 | FTL Plate 14    | H7: FOC  | -            | 0.484                             | 0.0423                                               | 0.479                                                  | -1.1                   |
| Rxn #09 | FTL Plate 14    | A8: NFC  | -            | 0.038                             | 0.0423                                               | 0.479                                                  | 101.0                  |
| Rxn #09 | FTL Plate 14    | B8       | 50           | 0.517                             | 0.0423                                               | 0.479                                                  | -8.7                   |
| Rxn #09 | FTL Plate 14    | C8       | 50           | 0.527                             | 0.0423                                               | 0.479                                                  | -11.0                  |
| Rxn #09 | FTL Plate 14    | D8       | 50           | 0.528                             | 0.0423                                               | 0.479                                                  | -11.2                  |
| Rxn #09 | FTL Plate 14    | E8       | 50           | 0.509                             | 0.0423                                               | 0.479                                                  | -6.9                   |
| Rxn #09 | FTL Plate 14    | F8       | 50           | 0.524                             | 0.0423                                               | 0.479                                                  | -10.3                  |
| Rxn #09 | FTL Plate 14    | G8       | 50           | 0.507                             | 0.0423                                               | 0.479                                                  | -6.4                   |
| Rxn #09 | FTL Plate 14    | H8: FOC  | -            | 0.461                             | 0.0423                                               | 0.479                                                  | 4.1                    |
| Rxn #09 | FTL Plate 14    | A9: NFC  | -            | 0.046                             | 0.0423                                               | 0.479                                                  | 99.2                   |
| Rxn #09 | FTL Plate 14    | B9       | 50           | 0.543                             | 0.0423                                               | 0.479                                                  | -14.7                  |
| Rxn #09 | FTL Plate 14    | C9       | 50           | 0.507                             | 0.0423                                               | 0.479                                                  | -6.4                   |
| Rxn #09 | FTL Plate 14    | D9       | 50           | 0.538                             | 0.0423                                               | 0.479                                                  | -13.5                  |
| Rxn #09 | FTL Plate 14    | E9       | 50           | 0.542                             | 0.0423                                               | 0.479                                                  | -14.4                  |
| Rxn #09 | FTL Plate 14    | F9       | 50           | 0.512                             | 0.0423                                               | 0.479                                                  | -7.6                   |
| Rxn #09 | FTL Plate 14    | G9       | 50           | 0.521                             | 0.0423                                               | 0.479                                                  | -9.6                   |
| Rxn #09 | FTL Plate 14    | H9: FOC  | -            | 0.496                             | 0.0423                                               | 0.479                                                  | -3.9                   |
| Rxn #09 | FTL Plate 14    | A10: NFC | -            | 0.047                             | 0.0423                                               | 0.479                                                  | 98.9                   |
| Rxn #09 | FTL Plate 14    | B10      | 50           | 0.532                             | 0.0423                                               | 0.479                                                  | -12.1                  |
| Rxn #09 | FTL Plate 14    | C10      | 50           | 0.544                             | 0.0423                                               | 0.479                                                  | -14.9                  |
| Rxn #09 | FTL Plate 14    | D10      | 50           | 0.502                             | 0.0423                                               | 0.479                                                  | -5.3                   |
| Rxn #09 | FTL Plate 14    | E10      | 50           | 0.507                             | 0.0423                                               | 0.479                                                  | -6.4                   |
| Rxn #09 | FTL Plate 14    | F10      | 50           | 0.515                             | 0.0423                                               | 0.479                                                  | -8.2                   |
| Rxn #09 | FTL Plate 14    | G10      | 50           | 0.507                             | 0.0423                                               | 0.479                                                  | -6.4                   |
| Rxn #09 | FTL Plate 14    | H10: FOC | -            | 0.473                             | 0.0423                                               | 0.479                                                  | 1.4                    |
| Rxn #09 | FTL Plate 14    | A11: NFC | -            | 0.049                             | 0.0423                                               | 0.479                                                  | 98.5                   |
| Rxn #09 | FTL Plate 14    | B11      | 50           | 0.513                             | 0.0423                                               | 0.479                                                  | -7.8                   |
| Rxn #09 | FTL Plate 14    | C11      | 50           | 0.531                             | 0.0423                                               | 0.479                                                  | -11.9                  |
| Rxn #09 | FTL Plate 14    | D11      | 50           | 0.539                             | 0.0423                                               | 0.479                                                  | -13.7                  |
| Rxn #09 | FTL Plate 14    | E11      | 50           | 0.493                             | 0.0423                                               | 0.479                                                  | -3.2                   |
| Rxn #09 | FTL Plate 14    | F11      | 50           | 0.523                             | 0.0423                                               | 0.479                                                  | -10.1                  |
| Rxn #09 | FTL Plate 14    | G11      | 50           | 0.529                             | 0.0423                                               | 0.479                                                  | -11.4                  |
| Rxn #09 | FTL Plate 14    | H11: FOC | -            | 0.467                             | 0.0423                                               | 0.479                                                  | 2.7                    |
| Rxn #09 | FTL Plate 14    | A12: NFC | -            | 0.050                             | 0.0423                                               | 0.479                                                  | 98.2                   |
| Rxn #09 | FTL Plate 14    | H12: FOC | -            | 0.480                             | 0.0423                                               | 0.479                                                  | -0.2                   |

**S1 Table. Data from Screening of Botanical Extract Library for Inhibition of KHKC Activity.**

| Rxn ID  | Sample          |         |              | Sample<br>( OD <sub>340nm</sub> ) | Ave. No Fructose Controls<br>( OD <sub>340nm</sub> ) | Ave. Fructose Only Controls<br>( OD <sub>340nm</sub> ) | KHKC<br>Inhibition (%) |
|---------|-----------------|---------|--------------|-----------------------------------|------------------------------------------------------|--------------------------------------------------------|------------------------|
|         | Botanical Plate | Well    | Conc (µg/mL) |                                   |                                                      |                                                        |                        |
| Rxn #10 | FTL Plate 15    | A1: NFC | -            | 0.043                             | 0.0350                                               | 0.469                                                  | 98.2                   |
| Rxn #10 | FTL Plate 15    | B1      | 50           | 0.454                             | 0.0350                                               | 0.469                                                  | 3.5                    |
| Rxn #10 | FTL Plate 15    | C1      | 50           | 0.448                             | 0.0350                                               | 0.469                                                  | 4.8                    |
| Rxn #10 | FTL Plate 15    | D1      | 50           | 0.473                             | 0.0350                                               | 0.469                                                  | -0.9                   |
| Rxn #10 | FTL Plate 15    | E1      | 50           | 0.495                             | 0.0350                                               | 0.469                                                  | -6.0                   |
| Rxn #10 | FTL Plate 15    | F1      | 50           | 0.466                             | 0.0350                                               | 0.469                                                  | 0.7                    |
| Rxn #10 | FTL Plate 15    | G1      | 50           | 0.509                             | 0.0350                                               | 0.469                                                  | -9.2                   |
| Rxn #10 | FTL Plate 15    | H1: FOC | -            | 0.473                             | 0.0350                                               | 0.469                                                  | -0.9                   |
| Rxn #10 | FTL Plate 15    | A2: NFC | -            | 0.034                             | 0.0350                                               | 0.469                                                  | 100.2                  |
| Rxn #10 | FTL Plate 15    | B2      | 50           | 0.477                             | 0.0350                                               | 0.469                                                  | -1.8                   |
| Rxn #10 | FTL Plate 15    | C2      | 50           | 0.463                             | 0.0350                                               | 0.469                                                  | 1.4                    |
| Rxn #10 | FTL Plate 15    | D2      | 50           | 0.436                             | 0.0350                                               | 0.469                                                  | 7.6                    |
| Rxn #10 | FTL Plate 15    | E2      | 50           | 0.424                             | 0.0350                                               | 0.469                                                  | 10.4                   |
| Rxn #10 | FTL Plate 15    | F2      | 50           | 0.472                             | 0.0350                                               | 0.469                                                  | -0.7                   |
| Rxn #10 | FTL Plate 15    | G2      | 50           | 0.458                             | 0.0350                                               | 0.469                                                  | 2.5                    |
| Rxn #10 | FTL Plate 15    | H2: FOC | -            | 0.471                             | 0.0350                                               | 0.469                                                  | -0.5                   |
| Rxn #10 | FTL Plate 15    | A3: NFC | -            | 0.039                             | 0.0350                                               | 0.469                                                  | 99.1                   |
| Rxn #10 | FTL Plate 15    | B3      | 50           | 0.449                             | 0.0350                                               | 0.469                                                  | 4.6                    |
| Rxn #10 | FTL Plate 15    | C3      | 50           | 0.435                             | 0.0350                                               | 0.469                                                  | 7.8                    |
| Rxn #10 | FTL Plate 15    | D3      | 50           | 0.487                             | 0.0350                                               | 0.469                                                  | -4.1                   |
| Rxn #10 | FTL Plate 15    | E3      | 50           | 0.456                             | 0.0350                                               | 0.469                                                  | 3.0                    |
| Rxn #10 | FTL Plate 15    | F3      | 50           | 0.484                             | 0.0350                                               | 0.469                                                  | -3.5                   |
| Rxn #10 | FTL Plate 15    | G3      | 50           | 0.421                             | 0.0350                                               | 0.469                                                  | 11.1                   |
| Rxn #10 | FTL Plate 15    | H3: FOC | -            | 0.474                             | 0.0350                                               | 0.469                                                  | -1.2                   |
| Rxn #10 | FTL Plate 15    | A4: NFC | -            | 0.034                             | 0.0350                                               | 0.469                                                  | 100.2                  |
| Rxn #10 | FTL Plate 15    | B4      | 50           | 0.463                             | 0.0350                                               | 0.469                                                  | 1.4                    |
| Rxn #10 | FTL Plate 15    | C4      | 50           | 0.416                             | 0.0350                                               | 0.469                                                  | 12.2                   |
| Rxn #10 | FTL Plate 15    | D4      | 50           | 0.454                             | 0.0350                                               | 0.469                                                  | 3.5                    |
| Rxn #10 | FTL Plate 15    | E4      | 50           | 0.459                             | 0.0350                                               | 0.469                                                  | 2.3                    |
| Rxn #10 | FTL Plate 15    | F4      | 50           | 0.452                             | 0.0350                                               | 0.469                                                  | 3.9                    |
| Rxn #10 | FTL Plate 15    | G4      | 50           | 0.406                             | 0.0350                                               | 0.469                                                  | 14.5                   |
| Rxn #10 | FTL Plate 15    | H4: FOC | -            | 0.509                             | 0.0350                                               | 0.469                                                  | -9.2                   |
| Rxn #10 | FTL Plate 15    | A5: NFC | -            | 0.031                             | 0.0350                                               | 0.469                                                  | 100.9                  |
| Rxn #10 | FTL Plate 15    | B5: NFC | -            | 0.034                             | 0.0350                                               | 0.469                                                  | 100.2                  |
| Rxn #10 | FTL Plate 15    | C5: NFC | -            | 0.030                             | 0.0350                                               | 0.469                                                  | 101.2                  |
| Rxn #10 | FTL Plate 15    | D5: NFC | -            | 0.035                             | 0.0350                                               | 0.469                                                  | 100.0                  |
| Rxn #10 | FTL Plate 15    | E5: FOC | -            | 0.467                             | 0.0350                                               | 0.469                                                  | 0.5                    |
| Rxn #10 | FTL Plate 15    | F5: FOC | -            | 0.470                             | 0.0350                                               | 0.469                                                  | -0.2                   |
| Rxn #10 | FTL Plate 15    | G5: FOC | -            | 0.469                             | 0.0350                                               | 0.469                                                  | 0.0                    |
| Rxn #10 | FTL Plate 15    | H5: FOC | -            | 0.462                             | 0.0350                                               | 0.469                                                  | 1.6                    |
| Rxn #10 | FTL Plate 15    | A6: NFC | -            | 0.035                             | 0.0350                                               | 0.469                                                  | 100.0                  |
| Rxn #10 | FTL Plate 15    | B6      | 50           | 0.494                             | 0.0350                                               | 0.469                                                  | -5.8                   |
| Rxn #10 | FTL Plate 15    | C6      | 50           | 0.463                             | 0.0350                                               | 0.469                                                  | 1.4                    |
| Rxn #10 | FTL Plate 15    | D6      | 50           | 0.458                             | 0.0350                                               | 0.469                                                  | 2.5                    |
| Rxn #10 | FTL Plate 15    | E6      | 50           | 0.413                             | 0.0350                                               | 0.469                                                  | 12.9                   |
| Rxn #10 | FTL Plate 15    | F6      | 50           | 0.458                             | 0.0350                                               | 0.469                                                  | 2.5                    |
| Rxn #10 | FTL Plate 15    | G6      | 50           | 0.462                             | 0.0350                                               | 0.469                                                  | 1.6                    |
| Rxn #10 | FTL Plate 15    | H6: FOC | -            | 0.450                             | 0.0350                                               | 0.469                                                  | 4.4                    |
| Rxn #10 | FTL Plate 15    | A7: NFC | -            | 0.034                             | 0.0350                                               | 0.469                                                  | 100.2                  |
| Rxn #10 | FTL Plate 15    | B7      | 50           | 0.435                             | 0.0350                                               | 0.469                                                  | 7.8                    |
| Rxn #10 | FTL Plate 15    | C7      | 50           | 0.462                             | 0.0350                                               | 0.469                                                  | 1.6                    |
| Rxn #10 | FTL Plate 15    | D7      | 50           | 0.454                             | 0.0350                                               | 0.469                                                  | 3.5                    |
| Rxn #10 | FTL Plate 15    | E7      | 50           | 0.452                             | 0.0350                                               | 0.469                                                  | 3.9                    |
| Rxn #10 | FTL Plate 15    | F7      | 50           | 0.460                             | 0.0350                                               | 0.469                                                  | 2.1                    |
| Rxn #10 | FTL Plate 15    | G7      | 50           | 0.455                             | 0.0350                                               | 0.469                                                  | 3.2                    |
| Rxn #10 | FTL Plate 15    | H7: FOC | -            | 0.437                             | 0.0350                                               | 0.469                                                  | 7.4                    |
| Rxn #10 | FTL Plate 15    | A8: NFC | -            | 0.036                             | 0.0350                                               | 0.469                                                  | 99.8                   |
| Rxn #10 | FTL Plate 15    | B8      | 50           | 0.435                             | 0.0350                                               | 0.469                                                  | 7.8                    |
| Rxn #10 | FTL Plate 15    | C8      | 50           | 0.444                             | 0.0350                                               | 0.469                                                  | 5.8                    |
| Rxn #10 | FTL Plate 15    | D8      | 50           | 0.412                             | 0.0350                                               | 0.469                                                  | 13.1                   |
| Rxn #10 | FTL Plate 15    | E8      | 50           | 0.436                             | 0.0350                                               | 0.469                                                  | 7.6                    |
| Rxn #10 | FTL Plate 15    | F8      | 50           | 0.379                             | 0.0350                                               | 0.469                                                  | 20.7                   |
| Rxn #10 | FTL Plate 15    | G8      | 50           | 0.418                             | 0.0350                                               | 0.469                                                  | 11.8                   |
| Rxn #10 | FTL Plate 15    | H8: FOC | -            | 0.445                             | 0.0350                                               | 0.469                                                  | 5.5                    |
| Rxn #10 | FTL Plate 15    | A9: NFC | -            | 0.031                             | 0.0350                                               | 0.469                                                  | 100.9                  |
| Rxn #10 | FTL Plate 15    | B9      | 50           | 0.164                             | 0.0350                                               | 0.469                                                  | 70.3                   |
| Rxn #10 | FTL Plate 15    | C9      | 50           | 0.459                             | 0.0350                                               | 0.469                                                  | 2.3                    |
| Rxn #10 | FTL Plate 15    | D9      | 50           | 0.476                             | 0.0350                                               | 0.469                                                  | -1.6                   |
| Rxn #10 | FTL Plate 15    | E9      | 50           | 0.426                             | 0.0350                                               | 0.469                                                  | 9.9                    |
| Rxn #10 | FTL Plate 15    | F9      | 50           | 0.452                             | 0.0350                                               | 0.469                                                  | 3.9                    |

**S1 Table. Data from Screening of Botanical Extract Library for Inhibition of KHKC Activity.**

| Rxn ID  | Sample          |          |              | Sample<br>( OD <sub>340nm</sub> ) | Ave. No Fructose Controls<br>( OD <sub>340nm</sub> ) | Ave. Fructose Only Controls<br>( OD <sub>340nm</sub> ) | KHKC<br>Inhibition (%) |
|---------|-----------------|----------|--------------|-----------------------------------|------------------------------------------------------|--------------------------------------------------------|------------------------|
|         | Botanical Plate | Well     | Conc (µg/mL) |                                   |                                                      |                                                        |                        |
| Rxn #10 | FTL Plate 15    | G9       | 50           | 0.469                             | 0.0350                                               | 0.469                                                  | 0.0                    |
| Rxn #10 | FTL Plate 15    | H9: FOC  | -            | 0.476                             | 0.0350                                               | 0.469                                                  | -1.6                   |
| Rxn #10 | FTL Plate 15    | A10: NFC | -            | 0.037                             | 0.0350                                               | 0.469                                                  | 99.5                   |
| Rxn #10 | FTL Plate 15    | B10      | 50           | 0.478                             | 0.0350                                               | 0.469                                                  | -2.1                   |
| Rxn #10 | FTL Plate 15    | C10      | 50           | 0.452                             | 0.0350                                               | 0.469                                                  | 3.9                    |
| Rxn #10 | FTL Plate 15    | D10      | 50           | 0.451                             | 0.0350                                               | 0.469                                                  | 4.1                    |
| Rxn #10 | FTL Plate 15    | E10      | 50           | 0.458                             | 0.0350                                               | 0.469                                                  | 2.5                    |
| Rxn #10 | FTL Plate 15    | F10      | 50           | 0.485                             | 0.0350                                               | 0.469                                                  | -3.7                   |
| Rxn #10 | FTL Plate 15    | G10      | 50           | 0.469                             | 0.0350                                               | 0.469                                                  | 0.0                    |
| Rxn #10 | FTL Plate 15    | H10: FOC | -            | 0.471                             | 0.0350                                               | 0.469                                                  | -0.5                   |
| Rxn #10 | FTL Plate 15    | A11: NFC | -            | 0.034                             | 0.0350                                               | 0.469                                                  | 100.2                  |
| Rxn #10 | FTL Plate 15    | B11      | 50           | 0.455                             | 0.0350                                               | 0.469                                                  | 3.2                    |
| Rxn #10 | FTL Plate 15    | C11      | 50           | 0.459                             | 0.0350                                               | 0.469                                                  | 2.3                    |
| Rxn #10 | FTL Plate 15    | D11      | 50           | 0.505                             | 0.0350                                               | 0.469                                                  | -8.3                   |
| Rxn #10 | FTL Plate 15    | E11      | 50           | 0.509                             | 0.0350                                               | 0.469                                                  | -9.2                   |
| Rxn #10 | FTL Plate 15    | F11      | 50           | 0.446                             | 0.0350                                               | 0.469                                                  | 5.3                    |
| Rxn #10 | FTL Plate 15    | G11      | 50           | 0.464                             | 0.0350                                               | 0.469                                                  | 1.2                    |
| Rxn #10 | FTL Plate 15    | H11: FOC | -            | 0.472                             | 0.0350                                               | 0.469                                                  | -0.7                   |
| Rxn #10 | FTL Plate 15    | A12: NFC | -            | 0.038                             | 0.0350                                               | 0.469                                                  | 99.3                   |
| Rxn #10 | FTL Plate 15    | H12: FOC | -            | 0.492                             | 0.0350                                               | 0.469                                                  | -5.3                   |
| Rxn #11 | FTL Plate 2     | A1: NFC  | -            | 0.057                             | 0.0521                                               | 0.492                                                  | 98.9                   |
| Rxn #11 | FTL Plate 2     | B1       | 50           | 0.486                             | 0.0521                                               | 0.492                                                  | 1.4                    |
| Rxn #11 | FTL Plate 2     | C1       | 50           | 0.452                             | 0.0521                                               | 0.492                                                  | 9.1                    |
| Rxn #11 | FTL Plate 2     | D1       | 50           | 0.476                             | 0.0521                                               | 0.492                                                  | 3.6                    |
| Rxn #11 | FTL Plate 2     | E1       | 50           | 0.459                             | 0.0521                                               | 0.492                                                  | 7.5                    |
| Rxn #11 | FTL Plate 2     | F1       | 50           | 0.428                             | 0.0521                                               | 0.492                                                  | 14.5                   |
| Rxn #11 | FTL Plate 2     | G1       | 50           | 0.356                             | 0.0521                                               | 0.492                                                  | 30.9                   |
| Rxn #11 | FTL Plate 2     | H1: FOC  | -            | 0.465                             | 0.0521                                               | 0.492                                                  | 6.1                    |
| Rxn #11 | FTL Plate 2     | A2: NFC  | -            | 0.062                             | 0.0521                                               | 0.492                                                  | 97.7                   |
| Rxn #11 | FTL Plate 2     | B2       | 50           | 0.478                             | 0.0521                                               | 0.492                                                  | 3.2                    |
| Rxn #11 | FTL Plate 2     | C2       | 50           | 0.509                             | 0.0521                                               | 0.492                                                  | -3.9                   |
| Rxn #11 | FTL Plate 2     | D2       | 50           | 0.466                             | 0.0521                                               | 0.492                                                  | 5.9                    |
| Rxn #11 | FTL Plate 2     | E2       | 50           | 0.496                             | 0.0521                                               | 0.492                                                  | -0.9                   |
| Rxn #11 | FTL Plate 2     | F2       | 50           | 0.422                             | 0.0521                                               | 0.492                                                  | 15.9                   |
| Rxn #11 | FTL Plate 2     | G2       | 50           | 0.479                             | 0.0521                                               | 0.492                                                  | 3.0                    |
| Rxn #11 | FTL Plate 2     | H2: FOC  | -            | 0.494                             | 0.0521                                               | 0.492                                                  | -0.5                   |
| Rxn #11 | FTL Plate 2     | A3: NFC  | -            | 0.062                             | 0.0521                                               | 0.492                                                  | 97.7                   |
| Rxn #11 | FTL Plate 2     | B3       | 50           | 0.508                             | 0.0521                                               | 0.492                                                  | -3.6                   |
| Rxn #11 | FTL Plate 2     | C3       | 50           | 0.500                             | 0.0521                                               | 0.492                                                  | -1.8                   |
| Rxn #11 | FTL Plate 2     | D3       | 50           | 0.462                             | 0.0521                                               | 0.492                                                  | 6.8                    |
| Rxn #11 | FTL Plate 2     | E3       | 50           | 0.479                             | 0.0521                                               | 0.492                                                  | 3.0                    |
| Rxn #11 | FTL Plate 2     | F3       | 50           | 0.496                             | 0.0521                                               | 0.492                                                  | -0.9                   |
| Rxn #11 | FTL Plate 2     | G3       | 50           | 0.504                             | 0.0521                                               | 0.492                                                  | -2.7                   |
| Rxn #11 | FTL Plate 2     | H3: FOC  | -            | 0.492                             | 0.0521                                               | 0.492                                                  | 0.0                    |
| Rxn #11 | FTL Plate 2     | A4: NFC  | -            | 0.051                             | 0.0521                                               | 0.492                                                  | 100.3                  |
| Rxn #11 | FTL Plate 2     | B4       | 50           | 0.500                             | 0.0521                                               | 0.492                                                  | -1.8                   |
| Rxn #11 | FTL Plate 2     | C4       | 50           | 0.522                             | 0.0521                                               | 0.492                                                  | -6.8                   |
| Rxn #11 | FTL Plate 2     | D4       | 50           | 0.487                             | 0.0521                                               | 0.492                                                  | 1.1                    |
| Rxn #11 | FTL Plate 2     | E4       | 50           | 0.477                             | 0.0521                                               | 0.492                                                  | 3.4                    |
| Rxn #11 | FTL Plate 2     | F4       | 50           | 0.484                             | 0.0521                                               | 0.492                                                  | 1.8                    |
| Rxn #11 | FTL Plate 2     | G4       | 50           | 0.502                             | 0.0521                                               | 0.492                                                  | -2.3                   |
| Rxn #11 | FTL Plate 2     | H4: FOC  | -            | 0.484                             | 0.0521                                               | 0.492                                                  | 1.8                    |
| Rxn #11 | FTL Plate 2     | A5: NFC  | -            | 0.054                             | 0.0521                                               | 0.492                                                  | 99.6                   |
| Rxn #11 | FTL Plate 2     | B5: NFC  | -            | 0.047                             | 0.0521                                               | 0.492                                                  | 101.2                  |
| Rxn #11 | FTL Plate 2     | C5: NFC  | -            | 0.039                             | 0.0521                                               | 0.492                                                  | 103.0                  |
| Rxn #11 | FTL Plate 2     | D5: NFC  | -            | 0.037                             | 0.0521                                               | 0.492                                                  | 103.4                  |
| Rxn #11 | FTL Plate 2     | E5: FOC  | -            | 0.510                             | 0.0521                                               | 0.492                                                  | -4.1                   |
| Rxn #11 | FTL Plate 2     | F5: FOC  | -            | 0.489                             | 0.0521                                               | 0.492                                                  | 0.7                    |
| Rxn #11 | FTL Plate 2     | G5: FOC  | -            | 0.513                             | 0.0521                                               | 0.492                                                  | -4.8                   |
| Rxn #11 | FTL Plate 2     | H5: FOC  | -            | 0.498                             | 0.0521                                               | 0.492                                                  | -1.4                   |
| Rxn #11 | FTL Plate 2     | A6: NFC  | -            | 0.065                             | 0.0521                                               | 0.492                                                  | 97.1                   |
| Rxn #11 | FTL Plate 2     | B6       | 50           | 0.426                             | 0.0521                                               | 0.492                                                  | 15.0                   |
| Rxn #11 | FTL Plate 2     | C6       | 50           | 0.504                             | 0.0521                                               | 0.492                                                  | -2.7                   |
| Rxn #11 | FTL Plate 2     | D6       | 50           | 0.525                             | 0.0521                                               | 0.492                                                  | -7.5                   |
| Rxn #11 | FTL Plate 2     | E6       | 50           | 0.504                             | 0.0521                                               | 0.492                                                  | -2.7                   |
| Rxn #11 | FTL Plate 2     | F6       | 50           | 0.497                             | 0.0521                                               | 0.492                                                  | -1.1                   |
| Rxn #11 | FTL Plate 2     | G6       | 50           | 0.507                             | 0.0521                                               | 0.492                                                  | -3.4                   |
| Rxn #11 | FTL Plate 2     | H6: FOC  | -            | 0.512                             | 0.0521                                               | 0.492                                                  | -4.5                   |
| Rxn #11 | FTL Plate 2     | A7: NFC  | -            | 0.055                             | 0.0521                                               | 0.492                                                  | 99.3                   |
| Rxn #11 | FTL Plate 2     | B7       | 50           | 0.533                             | 0.0521                                               | 0.492                                                  | -9.3                   |

**S1 Table. Data from Screening of Botanical Extract Library for Inhibition of KHKC Activity.**

| Rxn ID  | Sample          |          |              | Sample<br>( OD <sub>340nm</sub> ) | Ave. No Fructose Controls<br>( OD <sub>340nm</sub> ) | Ave. Fructose Only Controls<br>( OD <sub>340nm</sub> ) | KHKC<br>Inhibition (%) |
|---------|-----------------|----------|--------------|-----------------------------------|------------------------------------------------------|--------------------------------------------------------|------------------------|
|         | Botanical Plate | Well     | Conc (µg/mL) |                                   |                                                      |                                                        |                        |
| Rxn #11 | FTL Plate 2     | C7       | 50           | 0.513                             | 0.0521                                               | 0.492                                                  | -4.8                   |
| Rxn #11 | FTL Plate 2     | D7       | 50           | 0.515                             | 0.0521                                               | 0.492                                                  | -5.2                   |
| Rxn #11 | FTL Plate 2     | E7       | 50           | 0.517                             | 0.0521                                               | 0.492                                                  | -5.7                   |
| Rxn #11 | FTL Plate 2     | F7       | 50           | 0.523                             | 0.0521                                               | 0.492                                                  | -7.0                   |
| Rxn #11 | FTL Plate 2     | G7       | 50           | 0.483                             | 0.0521                                               | 0.492                                                  | 2.0                    |
| Rxn #11 | FTL Plate 2     | H7: FOC  | -            | 0.494                             | 0.0521                                               | 0.492                                                  | -0.5                   |
| Rxn #11 | FTL Plate 2     | A8: NFC  | -            | 0.057                             | 0.0521                                               | 0.492                                                  | 98.9                   |
| Rxn #11 | FTL Plate 2     | B8       | 50           | 0.493                             | 0.0521                                               | 0.492                                                  | -0.2                   |
| Rxn #11 | FTL Plate 2     | C8       | 50           | 0.474                             | 0.0521                                               | 0.492                                                  | 4.1                    |
| Rxn #11 | FTL Plate 2     | D8       | 50           | 0.514                             | 0.0521                                               | 0.492                                                  | -5.0                   |
| Rxn #11 | FTL Plate 2     | E8       | 50           | 0.505                             | 0.0521                                               | 0.492                                                  | -3.0                   |
| Rxn #11 | FTL Plate 2     | F8       | 50           | 0.481                             | 0.0521                                               | 0.492                                                  | 2.5                    |
| Rxn #11 | FTL Plate 2     | G8       | 50           | 0.479                             | 0.0521                                               | 0.492                                                  | 3.0                    |
| Rxn #11 | FTL Plate 2     | H8: FOC  | -            | 0.493                             | 0.0521                                               | 0.492                                                  | -0.2                   |
| Rxn #11 | FTL Plate 2     | A9: NFC  | -            | 0.046                             | 0.0521                                               | 0.492                                                  | 101.4                  |
| Rxn #11 | FTL Plate 2     | B9       | 50           | 0.495                             | 0.0521                                               | 0.492                                                  | -0.7                   |
| Rxn #11 | FTL Plate 2     | C9       | 50           | 0.503                             | 0.0521                                               | 0.492                                                  | -2.5                   |
| Rxn #11 | FTL Plate 2     | D9       | 50           | 0.551                             | 0.0521                                               | 0.492                                                  | -13.4                  |
| Rxn #11 | FTL Plate 2     | E9       | 50           | 0.506                             | 0.0521                                               | 0.492                                                  | -3.2                   |
| Rxn #11 | FTL Plate 2     | F9       | 50           | 0.554                             | 0.0521                                               | 0.492                                                  | -14.1                  |
| Rxn #11 | FTL Plate 2     | G9       | 50           | 0.381                             | 0.0521                                               | 0.492                                                  | 25.2                   |
| Rxn #11 | FTL Plate 2     | H9: FOC  | -            | 0.488                             | 0.0521                                               | 0.492                                                  | 0.9                    |
| Rxn #11 | FTL Plate 2     | A10: NFC | -            | 0.052                             | 0.0521                                               | 0.492                                                  | 100.0                  |
| Rxn #11 | FTL Plate 2     | B10      | 50           | 0.512                             | 0.0521                                               | 0.492                                                  | -4.5                   |
| Rxn #11 | FTL Plate 2     | C10      | 50           | 0.467                             | 0.0521                                               | 0.492                                                  | 5.7                    |
| Rxn #11 | FTL Plate 2     | D10      | 50           | 0.497                             | 0.0521                                               | 0.492                                                  | -1.1                   |
| Rxn #11 | FTL Plate 2     | E10      | 50           | 0.499                             | 0.0521                                               | 0.492                                                  | -1.6                   |
| Rxn #11 | FTL Plate 2     | F10      | 50           | 0.510                             | 0.0521                                               | 0.492                                                  | -4.1                   |
| Rxn #11 | FTL Plate 2     | G10      | 50           | 0.506                             | 0.0521                                               | 0.492                                                  | -3.2                   |
| Rxn #11 | FTL Plate 2     | H10: FOC | -            | 0.561                             | 0.0521                                               | 0.492                                                  | -15.7                  |
| Rxn #11 | FTL Plate 2     | A11: NFC | -            | 0.040                             | 0.0521                                               | 0.492                                                  | 102.8                  |
| Rxn #11 | FTL Plate 2     | B11      | 50           | 0.505                             | 0.0521                                               | 0.492                                                  | -3.0                   |
| Rxn #11 | FTL Plate 2     | C11      | 50           | 0.498                             | 0.0521                                               | 0.492                                                  | -1.4                   |
| Rxn #11 | FTL Plate 2     | D11      | 50           | 0.490                             | 0.0521                                               | 0.492                                                  | 0.5                    |
| Rxn #11 | FTL Plate 2     | E11      | 50           | 0.506                             | 0.0521                                               | 0.492                                                  | -3.2                   |
| Rxn #11 | FTL Plate 2     | F11      | 50           | 0.495                             | 0.0521                                               | 0.492                                                  | -0.7                   |
| Rxn #11 | FTL Plate 2     | G11      | 50           | 0.510                             | 0.0521                                               | 0.492                                                  | -4.1                   |
| Rxn #11 | FTL Plate 2     | H11: FOC | -            | 0.492                             | 0.0521                                               | 0.492                                                  | 0.0                    |
| Rxn #11 | FTL Plate 2     | A12: NFC | -            | 0.057                             | 0.0521                                               | 0.492                                                  | 98.9                   |
| Rxn #11 | FTL Plate 2     | H12: FOC | -            | 0.391                             | 0.0521                                               | 0.492                                                  | 23.0                   |
| Rxn #12 | FTL Plate 3     | A1: NFC  | -            | 0.072                             | 0.0641                                               | 0.555                                                  | 98.4                   |
| Rxn #12 | FTL Plate 3     | B1       | 50           | 0.339                             | 0.0641                                               | 0.555                                                  | 44.0                   |
| Rxn #12 | FTL Plate 3     | C1       | 50           | 0.523                             | 0.0641                                               | 0.555                                                  | 6.5                    |
| Rxn #12 | FTL Plate 3     | D1       | 50           | 0.502                             | 0.0641                                               | 0.555                                                  | 10.8                   |
| Rxn #12 | FTL Plate 3     | E1       | 50           | 0.533                             | 0.0641                                               | 0.555                                                  | 4.5                    |
| Rxn #12 | FTL Plate 3     | F1       | 50           | 0.518                             | 0.0641                                               | 0.555                                                  | 7.5                    |
| Rxn #12 | FTL Plate 3     | G1       | 50           | 0.536                             | 0.0641                                               | 0.555                                                  | 3.9                    |
| Rxn #12 | FTL Plate 3     | H1: FOC  | -            | 0.541                             | 0.0641                                               | 0.555                                                  | 2.9                    |
| Rxn #12 | FTL Plate 3     | A2: NFC  | -            | 0.066                             | 0.0641                                               | 0.555                                                  | 99.6                   |
| Rxn #12 | FTL Plate 3     | B2       | 50           | 0.568                             | 0.0641                                               | 0.555                                                  | -2.6                   |
| Rxn #12 | FTL Plate 3     | C2       | 50           | 0.545                             | 0.0641                                               | 0.555                                                  | 2.0                    |
| Rxn #12 | FTL Plate 3     | D2       | 50           | 0.271                             | 0.0641                                               | 0.555                                                  | 57.9                   |
| Rxn #12 | FTL Plate 3     | E2       | 50           | 0.549                             | 0.0641                                               | 0.555                                                  | 1.2                    |
| Rxn #12 | FTL Plate 3     | F2       | 50           | 0.558                             | 0.0641                                               | 0.555                                                  | -0.6                   |
| Rxn #12 | FTL Plate 3     | G2       | 50           | 0.537                             | 0.0641                                               | 0.555                                                  | 3.7                    |
| Rxn #12 | FTL Plate 3     | H2: FOC  | -            | 0.555                             | 0.0641                                               | 0.555                                                  | 0.0                    |
| Rxn #12 | FTL Plate 3     | A3: NFC  | -            | 0.072                             | 0.0641                                               | 0.555                                                  | 98.4                   |
| Rxn #12 | FTL Plate 3     | B3       | 50           | 0.551                             | 0.0641                                               | 0.555                                                  | 0.8                    |
| Rxn #12 | FTL Plate 3     | C3       | 50           | 0.238                             | 0.0641                                               | 0.555                                                  | 64.6                   |
| Rxn #12 | FTL Plate 3     | D3       | 50           | 0.571                             | 0.0641                                               | 0.555                                                  | -3.3                   |
| Rxn #12 | FTL Plate 3     | E3       | 50           | 0.563                             | 0.0641                                               | 0.555                                                  | -1.6                   |
| Rxn #12 | FTL Plate 3     | F3       | 50           | 0.566                             | 0.0641                                               | 0.555                                                  | -2.2                   |
| Rxn #12 | FTL Plate 3     | G3       | 50           | 0.561                             | 0.0641                                               | 0.555                                                  | -1.2                   |
| Rxn #12 | FTL Plate 3     | H3: FOC  | -            | 0.563                             | 0.0641                                               | 0.555                                                  | -1.6                   |
| Rxn #12 | FTL Plate 3     | A4: NFC  | -            | 0.065                             | 0.0641                                               | 0.555                                                  | 99.8                   |
| Rxn #12 | FTL Plate 3     | B4       | 50           | 0.580                             | 0.0641                                               | 0.555                                                  | -5.1                   |
| Rxn #12 | FTL Plate 3     | C4       | 50           | 0.552                             | 0.0641                                               | 0.555                                                  | 0.6                    |
| Rxn #12 | FTL Plate 3     | D4       | 50           | 0.544                             | 0.0641                                               | 0.555                                                  | 2.2                    |
| Rxn #12 | FTL Plate 3     | E4       | 50           | 0.556                             | 0.0641                                               | 0.555                                                  | -0.2                   |
| Rxn #12 | FTL Plate 3     | F4       | 50           | 0.564                             | 0.0641                                               | 0.555                                                  | -1.8                   |

**S1 Table. Data from Screening of Botanical Extract Library for Inhibition of KHKC Activity.**

| Rxn ID  | Sample          |          |              | Sample<br>( OD <sub>340nm</sub> ) | Ave. No Fructose Controls<br>( OD <sub>340nm</sub> ) | Ave. Fructose Only Controls<br>( OD <sub>340nm</sub> ) | KHKC<br>Inhibition (%) |
|---------|-----------------|----------|--------------|-----------------------------------|------------------------------------------------------|--------------------------------------------------------|------------------------|
|         | Botanical Plate | Well     | Conc (µg/mL) |                                   |                                                      |                                                        |                        |
| Rxn #12 | FTL Plate 3     | G4       | 50           | 0.589                             | 0.0641                                               | 0.555                                                  | -6.9                   |
| Rxn #12 | FTL Plate 3     | H4: FOC  | -            | 0.576                             | 0.0641                                               | 0.555                                                  | -4.3                   |
| Rxn #12 | FTL Plate 3     | A5: NFC  | -            | 0.057                             | 0.0641                                               | 0.555                                                  | 101.4                  |
| Rxn #12 | FTL Plate 3     | B5: NFC  | -            | 0.059                             | 0.0641                                               | 0.555                                                  | 101.0                  |
| Rxn #12 | FTL Plate 3     | C5: NFC  | -            | 0.065                             | 0.0641                                               | 0.555                                                  | 99.8                   |
| Rxn #12 | FTL Plate 3     | D5: NFC  | -            | 0.061                             | 0.0641                                               | 0.555                                                  | 100.6                  |
| Rxn #12 | FTL Plate 3     | E5: FOC  | -            | 0.540                             | 0.0641                                               | 0.555                                                  | 3.1                    |
| Rxn #12 | FTL Plate 3     | F5: FOC  | -            | 0.555                             | 0.0641                                               | 0.555                                                  | 0.0                    |
| Rxn #12 | FTL Plate 3     | G5: FOC  | -            | 0.547                             | 0.0641                                               | 0.555                                                  | 1.6                    |
| Rxn #12 | FTL Plate 3     | H5: FOC  | -            | 0.565                             | 0.0641                                               | 0.555                                                  | -2.0                   |
| Rxn #12 | FTL Plate 3     | A6: NFC  | -            | 0.062                             | 0.0641                                               | 0.555                                                  | 100.4                  |
| Rxn #12 | FTL Plate 3     | B6       | 50           | 0.583                             | 0.0641                                               | 0.555                                                  | -5.7                   |
| Rxn #12 | FTL Plate 3     | C6       | 50           | 0.502                             | 0.0641                                               | 0.555                                                  | 10.8                   |
| Rxn #12 | FTL Plate 3     | D6       | 50           | 0.576                             | 0.0641                                               | 0.555                                                  | -4.3                   |
| Rxn #12 | FTL Plate 3     | E6       | 50           | 0.575                             | 0.0641                                               | 0.555                                                  | -4.1                   |
| Rxn #12 | FTL Plate 3     | F6       | 50           | 0.562                             | 0.0641                                               | 0.555                                                  | -1.4                   |
| Rxn #12 | FTL Plate 3     | G6       | 50           | 0.533                             | 0.0641                                               | 0.555                                                  | 4.5                    |
| Rxn #12 | FTL Plate 3     | H6: FOC  | -            | 0.554                             | 0.0641                                               | 0.555                                                  | 0.2                    |
| Rxn #12 | FTL Plate 3     | A7: NFC  | -            | 0.054                             | 0.0641                                               | 0.555                                                  | 102.1                  |
| Rxn #12 | FTL Plate 3     | B7       | 50           | 0.549                             | 0.0641                                               | 0.555                                                  | 1.2                    |
| Rxn #12 | FTL Plate 3     | C7       | 50           | 0.572                             | 0.0641                                               | 0.555                                                  | -3.5                   |
| Rxn #12 | FTL Plate 3     | D7       | 50           | 0.561                             | 0.0641                                               | 0.555                                                  | -1.2                   |
| Rxn #12 | FTL Plate 3     | E7       | 50           | 0.579                             | 0.0641                                               | 0.555                                                  | -4.9                   |
| Rxn #12 | FTL Plate 3     | F7       | 50           | 0.499                             | 0.0641                                               | 0.555                                                  | 11.4                   |
| Rxn #12 | FTL Plate 3     | G7       | 50           | 0.556                             | 0.0641                                               | 0.555                                                  | -0.2                   |
| Rxn #12 | FTL Plate 3     | H7: FOC  | -            | 0.560                             | 0.0641                                               | 0.555                                                  | -1.0                   |
| Rxn #12 | FTL Plate 3     | A8: NFC  | -            | 0.063                             | 0.0641                                               | 0.555                                                  | 100.2                  |
| Rxn #12 | FTL Plate 3     | B8       | 50           | 0.565                             | 0.0641                                               | 0.555                                                  | -2.0                   |
| Rxn #12 | FTL Plate 3     | C8       | 50           | 0.559                             | 0.0641                                               | 0.555                                                  | -0.8                   |
| Rxn #12 | FTL Plate 3     | D8       | 50           | 0.567                             | 0.0641                                               | 0.555                                                  | -2.4                   |
| Rxn #12 | FTL Plate 3     | E8       | 50           | 0.540                             | 0.0641                                               | 0.555                                                  | 3.1                    |
| Rxn #12 | FTL Plate 3     | F8       | 50           | 0.550                             | 0.0641                                               | 0.555                                                  | 1.0                    |
| Rxn #12 | FTL Plate 3     | G8       | 50           | 0.549                             | 0.0641                                               | 0.555                                                  | 1.2                    |
| Rxn #12 | FTL Plate 3     | H8: FOC  | -            | 0.551                             | 0.0641                                               | 0.555                                                  | 0.8                    |
| Rxn #12 | FTL Plate 3     | A9: NFC  | -            | 0.072                             | 0.0641                                               | 0.555                                                  | 98.4                   |
| Rxn #12 | FTL Plate 3     | B9       | 50           | 0.525                             | 0.0641                                               | 0.555                                                  | 6.1                    |
| Rxn #12 | FTL Plate 3     | C9       | 50           | 0.566                             | 0.0641                                               | 0.555                                                  | -2.2                   |
| Rxn #12 | FTL Plate 3     | D9       | 50           | 0.547                             | 0.0641                                               | 0.555                                                  | 1.6                    |
| Rxn #12 | FTL Plate 3     | E9       | 50           | 0.553                             | 0.0641                                               | 0.555                                                  | 0.4                    |
| Rxn #12 | FTL Plate 3     | F9       | 50           | 0.544                             | 0.0641                                               | 0.555                                                  | 2.2                    |
| Rxn #12 | FTL Plate 3     | G9       | 50           | 0.545                             | 0.0641                                               | 0.555                                                  | 2.0                    |
| Rxn #12 | FTL Plate 3     | H9: FOC  | -            | 0.555                             | 0.0641                                               | 0.555                                                  | 0.0                    |
| Rxn #12 | FTL Plate 3     | A10: NFC | -            | 0.065                             | 0.0641                                               | 0.555                                                  | 99.8                   |
| Rxn #12 | FTL Plate 3     | B10      | 50           | 0.552                             | 0.0641                                               | 0.555                                                  | 0.6                    |
| Rxn #12 | FTL Plate 3     | C10      | 50           | 0.530                             | 0.0641                                               | 0.555                                                  | 5.1                    |
| Rxn #12 | FTL Plate 3     | D10      | 50           | 0.551                             | 0.0641                                               | 0.555                                                  | 0.8                    |
| Rxn #12 | FTL Plate 3     | E10      | 50           | 0.546                             | 0.0641                                               | 0.555                                                  | 1.8                    |
| Rxn #12 | FTL Plate 3     | F10      | 50           | 0.530                             | 0.0641                                               | 0.555                                                  | 5.1                    |
| Rxn #12 | FTL Plate 3     | G10      | 50           | 0.538                             | 0.0641                                               | 0.555                                                  | 3.5                    |
| Rxn #12 | FTL Plate 3     | H10: FOC | -            | 0.551                             | 0.0641                                               | 0.555                                                  | 0.8                    |
| Rxn #12 | FTL Plate 3     | A11: NFC | -            | 0.065                             | 0.0641                                               | 0.555                                                  | 99.8                   |
| Rxn #12 | FTL Plate 3     | B11      | 50           | 0.525                             | 0.0641                                               | 0.555                                                  | 6.1                    |
| Rxn #12 | FTL Plate 3     | C11      | 50           | 0.502                             | 0.0641                                               | 0.555                                                  | 10.8                   |
| Rxn #12 | FTL Plate 3     | D11      | 50           | 0.523                             | 0.0641                                               | 0.555                                                  | 6.5                    |
| Rxn #12 | FTL Plate 3     | E11      | 50           | 0.532                             | 0.0641                                               | 0.555                                                  | 4.7                    |
| Rxn #12 | FTL Plate 3     | F11      | 50           | 0.536                             | 0.0641                                               | 0.555                                                  | 3.9                    |
| Rxn #12 | FTL Plate 3     | G11      | 50           | 0.507                             | 0.0641                                               | 0.555                                                  | 9.8                    |
| Rxn #12 | FTL Plate 3     | H11: FOC | -            | 0.540                             | 0.0641                                               | 0.555                                                  | 3.1                    |
| Rxn #12 | FTL Plate 3     | A12: NFC | -            | 0.064                             | 0.0641                                               | 0.555                                                  | 100.0                  |
| Rxn #12 | FTL Plate 3     | H12: FOC | -            | 0.566                             | 0.0641                                               | 0.555                                                  | -2.2                   |
| Rxn #13 | FTL Plate 5     | A1: NFC  | -            | 0.064                             | 0.0709                                               | 0.594                                                  | 101.3                  |
| Rxn #13 | FTL Plate 5     | B1       | 50           | 0.609                             | 0.0709                                               | 0.594                                                  | -2.9                   |
| Rxn #13 | FTL Plate 5     | C1       | 50           | 0.618                             | 0.0709                                               | 0.594                                                  | -4.6                   |
| Rxn #13 | FTL Plate 5     | D1       | 50           | 0.612                             | 0.0709                                               | 0.594                                                  | -3.4                   |
| Rxn #13 | FTL Plate 5     | E1       | 50           | 0.579                             | 0.0709                                               | 0.594                                                  | 2.9                    |
| Rxn #13 | FTL Plate 5     | F1       | 50           | 0.597                             | 0.0709                                               | 0.594                                                  | -0.6                   |
| Rxn #13 | FTL Plate 5     | G1       | 50           | 0.600                             | 0.0709                                               | 0.594                                                  | -1.1                   |
| Rxn #13 | FTL Plate 5     | H1: FOC  | -            | 0.612                             | 0.0709                                               | 0.594                                                  | -3.4                   |
| Rxn #13 | FTL Plate 5     | A2: NFC  | -            | 0.089                             | 0.0709                                               | 0.594                                                  | 96.5                   |
| Rxn #13 | FTL Plate 5     | B2       | 50           | 0.610                             | 0.0709                                               | 0.594                                                  | -3.1                   |

**S1 Table. Data from Screening of Botanical Extract Library for Inhibition of KHKC Activity.**

| Rxn ID  | Sample          |          |              | Sample<br>( OD <sub>340nm</sub> ) | Ave. No Fructose Controls<br>( OD <sub>340nm</sub> ) | Ave. Fructose Only Controls<br>( OD <sub>340nm</sub> ) | KHKC<br>Inhibition (%) |
|---------|-----------------|----------|--------------|-----------------------------------|------------------------------------------------------|--------------------------------------------------------|------------------------|
|         | Botanical Plate | Well     | Conc (µg/mL) |                                   |                                                      |                                                        |                        |
| Rxn #13 | FTL Plate 5     | C2       | 50           | 0.616                             | 0.0709                                               | 0.594                                                  | -4.2                   |
| Rxn #13 | FTL Plate 5     | D2       | 50           | 0.589                             | 0.0709                                               | 0.594                                                  | 1.0                    |
| Rxn #13 | FTL Plate 5     | E2       | 50           | 0.596                             | 0.0709                                               | 0.594                                                  | -0.4                   |
| Rxn #13 | FTL Plate 5     | F2       | 50           | 0.601                             | 0.0709                                               | 0.594                                                  | -1.3                   |
| Rxn #13 | FTL Plate 5     | G2       | 50           | 0.575                             | 0.0709                                               | 0.594                                                  | 3.6                    |
| Rxn #13 | FTL Plate 5     | H2: FOC  | -            | 0.600                             | 0.0709                                               | 0.594                                                  | -1.1                   |
| Rxn #13 | FTL Plate 5     | A3: NFC  | -            | 0.087                             | 0.0709                                               | 0.594                                                  | 96.9                   |
| Rxn #13 | FTL Plate 5     | B3       | 50           | 0.615                             | 0.0709                                               | 0.594                                                  | -4.0                   |
| Rxn #13 | FTL Plate 5     | C3       | 50           | 0.600                             | 0.0709                                               | 0.594                                                  | -1.1                   |
| Rxn #13 | FTL Plate 5     | D3       | 50           | 0.614                             | 0.0709                                               | 0.594                                                  | -3.8                   |
| Rxn #13 | FTL Plate 5     | E3       | 50           | 0.598                             | 0.0709                                               | 0.594                                                  | -0.8                   |
| Rxn #13 | FTL Plate 5     | F3       | 50           | 0.564                             | 0.0709                                               | 0.594                                                  | 5.7                    |
| Rxn #13 | FTL Plate 5     | G3       | 50           | 0.598                             | 0.0709                                               | 0.594                                                  | -0.8                   |
| Rxn #13 | FTL Plate 5     | H3: FOC  | -            | 0.600                             | 0.0709                                               | 0.594                                                  | -1.1                   |
| Rxn #13 | FTL Plate 5     | A4: NFC  | -            | 0.076                             | 0.0709                                               | 0.594                                                  | 99.0                   |
| Rxn #13 | FTL Plate 5     | B4       | 50           | 0.648                             | 0.0709                                               | 0.594                                                  | -10.3                  |
| Rxn #13 | FTL Plate 5     | C4       | 50           | 0.573                             | 0.0709                                               | 0.594                                                  | 4.0                    |
| Rxn #13 | FTL Plate 5     | D4       | 50           | 0.572                             | 0.0709                                               | 0.594                                                  | 4.2                    |
| Rxn #13 | FTL Plate 5     | E4       | 50           | 0.604                             | 0.0709                                               | 0.594                                                  | -1.9                   |
| Rxn #13 | FTL Plate 5     | F4       | 50           | 0.599                             | 0.0709                                               | 0.594                                                  | -1.0                   |
| Rxn #13 | FTL Plate 5     | G4       | 50           | 0.563                             | 0.0709                                               | 0.594                                                  | 5.9                    |
| Rxn #13 | FTL Plate 5     | H4: FOC  | -            | 0.602                             | 0.0709                                               | 0.594                                                  | -1.5                   |
| Rxn #13 | FTL Plate 5     | A5: NFC  | -            | 0.053                             | 0.0709                                               | 0.594                                                  | 103.4                  |
| Rxn #13 | FTL Plate 5     | B5: NFC  | -            | 0.058                             | 0.0709                                               | 0.594                                                  | 102.5                  |
| Rxn #13 | FTL Plate 5     | C5: NFC  | -            | 0.061                             | 0.0709                                               | 0.594                                                  | 101.9                  |
| Rxn #13 | FTL Plate 5     | D5: NFC  | -            | 0.065                             | 0.0709                                               | 0.594                                                  | 101.1                  |
| Rxn #13 | FTL Plate 5     | E5: FOC  | -            | 0.579                             | 0.0709                                               | 0.594                                                  | 2.9                    |
| Rxn #13 | FTL Plate 5     | F5: FOC  | -            | 0.583                             | 0.0709                                               | 0.594                                                  | 2.1                    |
| Rxn #13 | FTL Plate 5     | G5: FOC  | -            | 0.591                             | 0.0709                                               | 0.594                                                  | 0.6                    |
| Rxn #13 | FTL Plate 5     | H5: FOC  | -            | 0.580                             | 0.0709                                               | 0.594                                                  | 2.7                    |
| Rxn #13 | FTL Plate 5     | A6: NFC  | -            | 0.074                             | 0.0709                                               | 0.594                                                  | 99.4                   |
| Rxn #13 | FTL Plate 5     | B6       | 50           | 0.615                             | 0.0709                                               | 0.594                                                  | -4.0                   |
| Rxn #13 | FTL Plate 5     | C6       | 50           | 0.587                             | 0.0709                                               | 0.594                                                  | 1.3                    |
| Rxn #13 | FTL Plate 5     | D6       | 50           | 0.619                             | 0.0709                                               | 0.594                                                  | -4.8                   |
| Rxn #13 | FTL Plate 5     | E6       | 50           | 0.496                             | 0.0709                                               | 0.594                                                  | 18.7                   |
| Rxn #13 | FTL Plate 5     | F6       | 50           | 0.588                             | 0.0709                                               | 0.594                                                  | 1.1                    |
| Rxn #13 | FTL Plate 5     | G6       | 50           | 0.594                             | 0.0709                                               | 0.594                                                  | 0.0                    |
| Rxn #13 | FTL Plate 5     | H6: FOC  | -            | 0.611                             | 0.0709                                               | 0.594                                                  | -3.2                   |
| Rxn #13 | FTL Plate 5     | A7: NFC  | -            | 0.079                             | 0.0709                                               | 0.594                                                  | 98.5                   |
| Rxn #13 | FTL Plate 5     | B7       | 50           | 0.602                             | 0.0709                                               | 0.594                                                  | -1.5                   |
| Rxn #13 | FTL Plate 5     | C7       | 50           | 0.625                             | 0.0709                                               | 0.594                                                  | -5.9                   |
| Rxn #13 | FTL Plate 5     | D7       | 50           | 0.605                             | 0.0709                                               | 0.594                                                  | -2.1                   |
| Rxn #13 | FTL Plate 5     | E7       | 50           | 0.576                             | 0.0709                                               | 0.594                                                  | 3.4                    |
| Rxn #13 | FTL Plate 5     | F7       | 50           | 0.588                             | 0.0709                                               | 0.594                                                  | 1.1                    |
| Rxn #13 | FTL Plate 5     | G7       | 50           | 0.580                             | 0.0709                                               | 0.594                                                  | 2.7                    |
| Rxn #13 | FTL Plate 5     | H7: FOC  | -            | 0.590                             | 0.0709                                               | 0.594                                                  | 0.8                    |
| Rxn #13 | FTL Plate 5     | A8: NFC  | -            | 0.073                             | 0.0709                                               | 0.594                                                  | 99.6                   |
| Rxn #13 | FTL Plate 5     | B8       | 50           | 0.588                             | 0.0709                                               | 0.594                                                  | 1.1                    |
| Rxn #13 | FTL Plate 5     | C8       | 50           | 0.599                             | 0.0709                                               | 0.594                                                  | -1.0                   |
| Rxn #13 | FTL Plate 5     | D8       | 50           | 0.577                             | 0.0709                                               | 0.594                                                  | 3.2                    |
| Rxn #13 | FTL Plate 5     | E8       | 50           | 0.581                             | 0.0709                                               | 0.594                                                  | 2.5                    |
| Rxn #13 | FTL Plate 5     | F8       | 50           | 0.564                             | 0.0709                                               | 0.594                                                  | 5.7                    |
| Rxn #13 | FTL Plate 5     | G8       | 50           | 0.549                             | 0.0709                                               | 0.594                                                  | 8.6                    |
| Rxn #13 | FTL Plate 5     | H8: FOC  | -            | 0.585                             | 0.0709                                               | 0.594                                                  | 1.7                    |
| Rxn #13 | FTL Plate 5     | A9: NFC  | -            | 0.063                             | 0.0709                                               | 0.594                                                  | 101.5                  |
| Rxn #13 | FTL Plate 5     | B9       | 50           | 0.605                             | 0.0709                                               | 0.594                                                  | -2.1                   |
| Rxn #13 | FTL Plate 5     | C9       | 50           | 0.599                             | 0.0709                                               | 0.594                                                  | -1.0                   |
| Rxn #13 | FTL Plate 5     | D9       | 50           | 0.548                             | 0.0709                                               | 0.594                                                  | 8.8                    |
| Rxn #13 | FTL Plate 5     | E9       | 50           | 0.585                             | 0.0709                                               | 0.594                                                  | 1.7                    |
| Rxn #13 | FTL Plate 5     | F9       | 50           | 0.562                             | 0.0709                                               | 0.594                                                  | 6.1                    |
| Rxn #13 | FTL Plate 5     | G9       | 50           | 0.571                             | 0.0709                                               | 0.594                                                  | 4.4                    |
| Rxn #13 | FTL Plate 5     | H9: FOC  | -            | 0.580                             | 0.0709                                               | 0.594                                                  | 2.7                    |
| Rxn #13 | FTL Plate 5     | A10: NFC | -            | 0.068                             | 0.0709                                               | 0.594                                                  | 100.6                  |
| Rxn #13 | FTL Plate 5     | B10      | 50           | 0.603                             | 0.0709                                               | 0.594                                                  | -1.7                   |
| Rxn #13 | FTL Plate 5     | C10      | 50           | 0.520                             | 0.0709                                               | 0.594                                                  | 14.1                   |
| Rxn #13 | FTL Plate 5     | D10      | 50           | 0.579                             | 0.0709                                               | 0.594                                                  | 2.9                    |
| Rxn #13 | FTL Plate 5     | E10      | 50           | 0.588                             | 0.0709                                               | 0.594                                                  | 1.1                    |
| Rxn #13 | FTL Plate 5     | F10      | 50           | 0.573                             | 0.0709                                               | 0.594                                                  | 4.0                    |
| Rxn #13 | FTL Plate 5     | G10      | 50           | 0.577                             | 0.0709                                               | 0.594                                                  | 3.2                    |
| Rxn #13 | FTL Plate 5     | H10: FOC | -            | 0.600                             | 0.0709                                               | 0.594                                                  | -1.1                   |

**S1 Table. Data from Screening of Botanical Extract Library for Inhibition of KHKC Activity.**

| Rxn ID  | Sample          |          |              | Sample<br>( OD <sub>340nm</sub> ) | Ave. No Fructose Controls<br>( OD <sub>340nm</sub> ) | Ave. Fructose Only Controls<br>( OD <sub>340nm</sub> ) | KHKC<br>Inhibition (%) |
|---------|-----------------|----------|--------------|-----------------------------------|------------------------------------------------------|--------------------------------------------------------|------------------------|
|         | Botanical Plate | Well     | Conc (µg/mL) |                                   |                                                      |                                                        |                        |
| Rxn #13 | FTL Plate 5     | A11: NFC | -            | 0.073                             | 0.0709                                               | 0.594                                                  | 99.6                   |
| Rxn #13 | FTL Plate 5     | B11      | 50           | 0.570                             | 0.0709                                               | 0.594                                                  | 4.6                    |
| Rxn #13 | FTL Plate 5     | C11      | 50           | 0.582                             | 0.0709                                               | 0.594                                                  | 2.3                    |
| Rxn #13 | FTL Plate 5     | D11      | 50           | 0.557                             | 0.0709                                               | 0.594                                                  | 7.1                    |
| Rxn #13 | FTL Plate 5     | E11      | 50           | 0.583                             | 0.0709                                               | 0.594                                                  | 2.1                    |
| Rxn #13 | FTL Plate 5     | F11      | 50           | 0.580                             | 0.0709                                               | 0.594                                                  | 2.7                    |
| Rxn #13 | FTL Plate 5     | G11      | 50           | 0.585                             | 0.0709                                               | 0.594                                                  | 1.7                    |
| Rxn #13 | FTL Plate 5     | H11: FOC | -            | 0.592                             | 0.0709                                               | 0.594                                                  | 0.4                    |
| Rxn #13 | FTL Plate 5     | A12: NFC | -            | 0.080                             | 0.0709                                               | 0.594                                                  | 98.3                   |
| Rxn #13 | FTL Plate 5     | H12: FOC | -            | 0.606                             | 0.0709                                               | 0.594                                                  | -2.3                   |
| Rxn #14 | FTL Plate 6     | A1: NFC  | -            | 0.050                             | 0.0534                                               | 0.539                                                  | 100.7                  |
| Rxn #14 | FTL Plate 6     | B1       | 50           | 0.531                             | 0.0534                                               | 0.539                                                  | 1.6                    |
| Rxn #14 | FTL Plate 6     | C1       | 50           | 0.497                             | 0.0534                                               | 0.539                                                  | 8.6                    |
| Rxn #14 | FTL Plate 6     | D1       | 50           | 0.458                             | 0.0534                                               | 0.539                                                  | 16.7                   |
| Rxn #14 | FTL Plate 6     | E1       | 50           | 0.499                             | 0.0534                                               | 0.539                                                  | 8.2                    |
| Rxn #14 | FTL Plate 6     | F1       | 50           | 0.499                             | 0.0534                                               | 0.539                                                  | 8.2                    |
| Rxn #14 | FTL Plate 6     | G1       | 50           | 0.484                             | 0.0534                                               | 0.539                                                  | 11.3                   |
| Rxn #14 | FTL Plate 6     | H1: FOC  | -            | 0.502                             | 0.0534                                               | 0.539                                                  | 7.6                    |
| Rxn #14 | FTL Plate 6     | A2: NFC  | -            | 0.045                             | 0.0534                                               | 0.539                                                  | 101.7                  |
| Rxn #14 | FTL Plate 6     | B2       | 50           | 0.484                             | 0.0534                                               | 0.539                                                  | 11.3                   |
| Rxn #14 | FTL Plate 6     | C2       | 50           | 0.531                             | 0.0534                                               | 0.539                                                  | 1.6                    |
| Rxn #14 | FTL Plate 6     | D2       | 50           | 0.526                             | 0.0534                                               | 0.539                                                  | 2.7                    |
| Rxn #14 | FTL Plate 6     | E2       | 50           | 0.516                             | 0.0534                                               | 0.539                                                  | 4.7                    |
| Rxn #14 | FTL Plate 6     | F2       | 50           | 0.504                             | 0.0534                                               | 0.539                                                  | 7.2                    |
| Rxn #14 | FTL Plate 6     | G2       | 50           | 0.524                             | 0.0534                                               | 0.539                                                  | 3.1                    |
| Rxn #14 | FTL Plate 6     | H2: FOC  | -            | 0.533                             | 0.0534                                               | 0.539                                                  | 1.2                    |
| Rxn #14 | FTL Plate 6     | A3: NFC  | -            | 0.043                             | 0.0534                                               | 0.539                                                  | 102.1                  |
| Rxn #14 | FTL Plate 6     | B3       | 50           | 0.486                             | 0.0534                                               | 0.539                                                  | 10.9                   |
| Rxn #14 | FTL Plate 6     | C3       | 50           | 0.569                             | 0.0534                                               | 0.539                                                  | -6.2                   |
| Rxn #14 | FTL Plate 6     | D3       | 50           | 0.497                             | 0.0534                                               | 0.539                                                  | 8.6                    |
| Rxn #14 | FTL Plate 6     | E3       | 50           | 0.525                             | 0.0534                                               | 0.539                                                  | 2.9                    |
| Rxn #14 | FTL Plate 6     | F3       | 50           | 0.535                             | 0.0534                                               | 0.539                                                  | 0.8                    |
| Rxn #14 | FTL Plate 6     | G3       | 50           | 0.535                             | 0.0534                                               | 0.539                                                  | 0.8                    |
| Rxn #14 | FTL Plate 6     | H3: FOC  | -            | 0.537                             | 0.0534                                               | 0.539                                                  | 0.4                    |
| Rxn #14 | FTL Plate 6     | A4: NFC  | -            | 0.054                             | 0.0534                                               | 0.539                                                  | 99.9                   |
| Rxn #14 | FTL Plate 6     | B4       | 50           | 0.544                             | 0.0534                                               | 0.539                                                  | -1.0                   |
| Rxn #14 | FTL Plate 6     | C4       | 50           | 0.577                             | 0.0534                                               | 0.539                                                  | -7.8                   |
| Rxn #14 | FTL Plate 6     | D4       | 50           | 0.540                             | 0.0534                                               | 0.539                                                  | -0.2                   |
| Rxn #14 | FTL Plate 6     | E4       | 50           | 0.536                             | 0.0534                                               | 0.539                                                  | 0.6                    |
| Rxn #14 | FTL Plate 6     | F4       | 50           | 0.530                             | 0.0534                                               | 0.539                                                  | 1.9                    |
| Rxn #14 | FTL Plate 6     | G4       | 50           | 0.571                             | 0.0534                                               | 0.539                                                  | -6.6                   |
| Rxn #14 | FTL Plate 6     | H4: FOC  | -            | 0.526                             | 0.0534                                               | 0.539                                                  | 2.7                    |
| Rxn #14 | FTL Plate 6     | A5: NFC  | -            | 0.054                             | 0.0534                                               | 0.539                                                  | 99.9                   |
| Rxn #14 | FTL Plate 6     | B5: NFC  | -            | 0.056                             | 0.0534                                               | 0.539                                                  | 99.5                   |
| Rxn #14 | FTL Plate 6     | C5: NFC  | -            | 0.045                             | 0.0534                                               | 0.539                                                  | 101.7                  |
| Rxn #14 | FTL Plate 6     | D5: NFC  | -            | 0.040                             | 0.0534                                               | 0.539                                                  | 102.8                  |
| Rxn #14 | FTL Plate 6     | E5: FOC  | -            | 0.545                             | 0.0534                                               | 0.539                                                  | -1.2                   |
| Rxn #14 | FTL Plate 6     | F5: FOC  | -            | 0.545                             | 0.0534                                               | 0.539                                                  | -1.2                   |
| Rxn #14 | FTL Plate 6     | G5: FOC  | -            | 0.537                             | 0.0534                                               | 0.539                                                  | 0.4                    |
| Rxn #14 | FTL Plate 6     | H5: FOC  | -            | 0.546                             | 0.0534                                               | 0.539                                                  | -1.4                   |
| Rxn #14 | FTL Plate 6     | A6: NFC  | -            | 0.060                             | 0.0534                                               | 0.539                                                  | 98.6                   |
| Rxn #14 | FTL Plate 6     | B6       | 50           | 0.548                             | 0.0534                                               | 0.539                                                  | -1.9                   |
| Rxn #14 | FTL Plate 6     | C6       | 50           | 0.533                             | 0.0534                                               | 0.539                                                  | 1.2                    |
| Rxn #14 | FTL Plate 6     | D6       | 50           | 0.537                             | 0.0534                                               | 0.539                                                  | 0.4                    |
| Rxn #14 | FTL Plate 6     | E6       | 50           | 0.514                             | 0.0534                                               | 0.539                                                  | 5.1                    |
| Rxn #14 | FTL Plate 6     | F6       | 50           | 0.571                             | 0.0534                                               | 0.539                                                  | -6.6                   |
| Rxn #14 | FTL Plate 6     | G6       | 50           | 0.516                             | 0.0534                                               | 0.539                                                  | 4.7                    |
| Rxn #14 | FTL Plate 6     | H6: FOC  | -            | 0.542                             | 0.0534                                               | 0.539                                                  | -0.6                   |
| Rxn #14 | FTL Plate 6     | A7: NFC  | -            | 0.064                             | 0.0534                                               | 0.539                                                  | 97.8                   |
| Rxn #14 | FTL Plate 6     | B7       | 50           | 0.532                             | 0.0534                                               | 0.539                                                  | 1.4                    |
| Rxn #14 | FTL Plate 6     | C7       | 50           | 0.549                             | 0.0534                                               | 0.539                                                  | -2.1                   |
| Rxn #14 | FTL Plate 6     | D7       | 50           | 0.550                             | 0.0534                                               | 0.539                                                  | -2.3                   |
| Rxn #14 | FTL Plate 6     | E7       | 50           | 0.543                             | 0.0534                                               | 0.539                                                  | -0.8                   |
| Rxn #14 | FTL Plate 6     | F7       | 50           | 0.520                             | 0.0534                                               | 0.539                                                  | 3.9                    |
| Rxn #14 | FTL Plate 6     | G7       | 50           | 0.497                             | 0.0534                                               | 0.539                                                  | 8.6                    |
| Rxn #14 | FTL Plate 6     | H7: FOC  | -            | 0.551                             | 0.0534                                               | 0.539                                                  | -2.5                   |
| Rxn #14 | FTL Plate 6     | A8: NFC  | -            | 0.063                             | 0.0534                                               | 0.539                                                  | 98.0                   |
| Rxn #14 | FTL Plate 6     | B8       | 50           | 0.548                             | 0.0534                                               | 0.539                                                  | -1.9                   |
| Rxn #14 | FTL Plate 6     | C8       | 50           | 0.562                             | 0.0534                                               | 0.539                                                  | -4.7                   |
| Rxn #14 | FTL Plate 6     | D8       | 50           | 0.506                             | 0.0534                                               | 0.539                                                  | 6.8                    |

**S1 Table. Data from Screening of Botanical Extract Library for Inhibition of KHKC Activity.**

| Rxn ID  | Sample          |          |              | Sample<br>( OD <sub>340nm</sub> ) | Ave. No Fructose Controls<br>( OD <sub>340nm</sub> ) | Ave. Fructose Only Controls<br>( OD <sub>340nm</sub> ) | KHKC<br>Inhibition (%) |
|---------|-----------------|----------|--------------|-----------------------------------|------------------------------------------------------|--------------------------------------------------------|------------------------|
|         | Botanical Plate | Well     | Conc (µg/mL) |                                   |                                                      |                                                        |                        |
| Rxn #14 | FTL Plate 6     | E8       | 50           | 0.548                             | 0.0534                                               | 0.539                                                  | -1.9                   |
| Rxn #14 | FTL Plate 6     | F8       | 50           | 0.511                             | 0.0534                                               | 0.539                                                  | 5.8                    |
| Rxn #14 | FTL Plate 6     | G8       | 50           | 0.541                             | 0.0534                                               | 0.539                                                  | -0.4                   |
| Rxn #14 | FTL Plate 6     | H8: FOC  | -            | 0.556                             | 0.0534                                               | 0.539                                                  | -3.5                   |
| Rxn #14 | FTL Plate 6     | A9: NFC  | -            | 0.053                             | 0.0534                                               | 0.539                                                  | 100.1                  |
| Rxn #14 | FTL Plate 6     | B9       | 50           | 0.521                             | 0.0534                                               | 0.539                                                  | 3.7                    |
| Rxn #14 | FTL Plate 6     | C9       | 50           | 0.550                             | 0.0534                                               | 0.539                                                  | -2.3                   |
| Rxn #14 | FTL Plate 6     | D9       | 50           | 0.528                             | 0.0534                                               | 0.539                                                  | 2.3                    |
| Rxn #14 | FTL Plate 6     | E9       | 50           | 0.553                             | 0.0534                                               | 0.539                                                  | -2.9                   |
| Rxn #14 | FTL Plate 6     | F9       | 50           | 0.546                             | 0.0534                                               | 0.539                                                  | -1.4                   |
| Rxn #14 | FTL Plate 6     | G9       | 50           | 0.540                             | 0.0534                                               | 0.539                                                  | -0.2                   |
| Rxn #14 | FTL Plate 6     | H9: FOC  | -            | 0.540                             | 0.0534                                               | 0.539                                                  | -0.2                   |
| Rxn #14 | FTL Plate 6     | A10: NFC | -            | 0.053                             | 0.0534                                               | 0.539                                                  | 100.1                  |
| Rxn #14 | FTL Plate 6     | B10      | 50           | 0.570                             | 0.0534                                               | 0.539                                                  | -6.4                   |
| Rxn #14 | FTL Plate 6     | C10      | 50           | 0.556                             | 0.0534                                               | 0.539                                                  | -3.5                   |
| Rxn #14 | FTL Plate 6     | D10      | 50           | 0.521                             | 0.0534                                               | 0.539                                                  | 3.7                    |
| Rxn #14 | FTL Plate 6     | E10      | 50           | 0.570                             | 0.0534                                               | 0.539                                                  | -6.4                   |
| Rxn #14 | FTL Plate 6     | F10      | 50           | 0.541                             | 0.0534                                               | 0.539                                                  | -0.4                   |
| Rxn #14 | FTL Plate 6     | G10      | 50           | 0.557                             | 0.0534                                               | 0.539                                                  | -3.7                   |
| Rxn #14 | FTL Plate 6     | H10: FOC | -            | 0.543                             | 0.0534                                               | 0.539                                                  | -0.8                   |
| Rxn #14 | FTL Plate 6     | A11: NFC | -            | 0.062                             | 0.0534                                               | 0.539                                                  | 98.2                   |
| Rxn #14 | FTL Plate 6     | B11      | 50           | 0.584                             | 0.0534                                               | 0.539                                                  | -9.3                   |
| Rxn #14 | FTL Plate 6     | C11      | 50           | 0.523                             | 0.0534                                               | 0.539                                                  | 3.3                    |
| Rxn #14 | FTL Plate 6     | D11      | 50           | 0.569                             | 0.0534                                               | 0.539                                                  | -6.2                   |
| Rxn #14 | FTL Plate 6     | E11      | 50           | 0.557                             | 0.0534                                               | 0.539                                                  | -3.7                   |
| Rxn #14 | FTL Plate 6     | F11      | 50           | 0.552                             | 0.0534                                               | 0.539                                                  | -2.7                   |
| Rxn #14 | FTL Plate 6     | G11      | 50           | 0.568                             | 0.0534                                               | 0.539                                                  | -6.0                   |
| Rxn #14 | FTL Plate 6     | H11: FOC | -            | 0.544                             | 0.0534                                               | 0.539                                                  | -1.0                   |
| Rxn #14 | FTL Plate 6     | A12: NFC | -            | 0.059                             | 0.0534                                               | 0.539                                                  | 98.8                   |
| Rxn #14 | FTL Plate 6     | H12: FOC | -            | 0.541                             | 0.0534                                               | 0.539                                                  | -0.4                   |
| Rxn #15 | FTL Plate 7     | A1: NFC  | -            | 0.067                             | 0.0661                                               | 0.520                                                  | 99.8                   |
| Rxn #15 | FTL Plate 7     | B1       | 50           | 0.472                             | 0.0661                                               | 0.520                                                  | 10.6                   |
| Rxn #15 | FTL Plate 7     | C1       | 50           | 0.485                             | 0.0661                                               | 0.520                                                  | 7.7                    |
| Rxn #15 | FTL Plate 7     | D1       | 50           | 0.410                             | 0.0661                                               | 0.520                                                  | 24.2                   |
| Rxn #15 | FTL Plate 7     | E1       | 50           | 0.457                             | 0.0661                                               | 0.520                                                  | 13.9                   |
| Rxn #15 | FTL Plate 7     | F1       | 50           | 0.483                             | 0.0661                                               | 0.520                                                  | 8.2                    |
| Rxn #15 | FTL Plate 7     | G1       | 50           | 0.451                             | 0.0661                                               | 0.520                                                  | 15.2                   |
| Rxn #15 | FTL Plate 7     | H1: FOC  | -            | 0.498                             | 0.0661                                               | 0.520                                                  | 4.8                    |
| Rxn #15 | FTL Plate 7     | A2: NFC  | -            | 0.073                             | 0.0661                                               | 0.520                                                  | 98.5                   |
| Rxn #15 | FTL Plate 7     | B2       | 50           | 0.453                             | 0.0661                                               | 0.520                                                  | 14.8                   |
| Rxn #15 | FTL Plate 7     | C2       | 50           | 0.485                             | 0.0661                                               | 0.520                                                  | 7.7                    |
| Rxn #15 | FTL Plate 7     | D2       | 50           | 0.507                             | 0.0661                                               | 0.520                                                  | 2.9                    |
| Rxn #15 | FTL Plate 7     | E2       | 50           | 0.447                             | 0.0661                                               | 0.520                                                  | 16.1                   |
| Rxn #15 | FTL Plate 7     | F2       | 50           | 0.484                             | 0.0661                                               | 0.520                                                  | 7.9                    |
| Rxn #15 | FTL Plate 7     | G2       | 50           | 0.492                             | 0.0661                                               | 0.520                                                  | 6.2                    |
| Rxn #15 | FTL Plate 7     | H2: FOC  | -            | 0.522                             | 0.0661                                               | 0.520                                                  | -0.4                   |
| Rxn #15 | FTL Plate 7     | A3: NFC  | -            | 0.062                             | 0.0661                                               | 0.520                                                  | 100.9                  |
| Rxn #15 | FTL Plate 7     | B3       | 50           | 0.511                             | 0.0661                                               | 0.520                                                  | 2.0                    |
| Rxn #15 | FTL Plate 7     | C3       | 50           | 0.496                             | 0.0661                                               | 0.520                                                  | 5.3                    |
| Rxn #15 | FTL Plate 7     | D3       | 50           | 0.493                             | 0.0661                                               | 0.520                                                  | 5.9                    |
| Rxn #15 | FTL Plate 7     | E3       | 50           | 0.518                             | 0.0661                                               | 0.520                                                  | 0.4                    |
| Rxn #15 | FTL Plate 7     | F3       | 50           | 0.447                             | 0.0661                                               | 0.520                                                  | 16.1                   |
| Rxn #15 | FTL Plate 7     | G3       | 50           | 0.489                             | 0.0661                                               | 0.520                                                  | 6.8                    |
| Rxn #15 | FTL Plate 7     | H3: FOC  | -            | 0.525                             | 0.0661                                               | 0.520                                                  | -1.1                   |
| Rxn #15 | FTL Plate 7     | A4: NFC  | -            | 0.066                             | 0.0661                                               | 0.520                                                  | 100.0                  |
| Rxn #15 | FTL Plate 7     | B4       | 50           | 0.492                             | 0.0661                                               | 0.520                                                  | 6.2                    |
| Rxn #15 | FTL Plate 7     | C4       | 50           | 0.496                             | 0.0661                                               | 0.520                                                  | 5.3                    |
| Rxn #15 | FTL Plate 7     | D4       | 50           | 0.514                             | 0.0661                                               | 0.520                                                  | 1.3                    |
| Rxn #15 | FTL Plate 7     | E4       | 50           | 0.533                             | 0.0661                                               | 0.520                                                  | -2.9                   |
| Rxn #15 | FTL Plate 7     | F4       | 50           | 0.488                             | 0.0661                                               | 0.520                                                  | 7.1                    |
| Rxn #15 | FTL Plate 7     | G4       | 50           | 0.485                             | 0.0661                                               | 0.520                                                  | 7.7                    |
| Rxn #15 | FTL Plate 7     | H4: FOC  | -            | 0.538                             | 0.0661                                               | 0.520                                                  | -4.0                   |
| Rxn #15 | FTL Plate 7     | A5: NFC  | -            | 0.064                             | 0.0661                                               | 0.520                                                  | 100.5                  |
| Rxn #15 | FTL Plate 7     | B5: NFC  | -            | 0.063                             | 0.0661                                               | 0.520                                                  | 100.7                  |
| Rxn #15 | FTL Plate 7     | C5: NFC  | -            | 0.058                             | 0.0661                                               | 0.520                                                  | 101.8                  |
| Rxn #15 | FTL Plate 7     | D5: NFC  | -            | 0.054                             | 0.0661                                               | 0.520                                                  | 102.7                  |
| Rxn #15 | FTL Plate 7     | E5: FOC  | -            | 0.534                             | 0.0661                                               | 0.520                                                  | -3.1                   |
| Rxn #15 | FTL Plate 7     | F5: FOC  | -            | 0.517                             | 0.0661                                               | 0.520                                                  | 0.7                    |
| Rxn #15 | FTL Plate 7     | G5: FOC  | -            | 0.510                             | 0.0661                                               | 0.520                                                  | 2.2                    |
| Rxn #15 | FTL Plate 7     | H5: FOC  | -            | 0.524                             | 0.0661                                               | 0.520                                                  | -0.9                   |



**S1 Table. Data from Screening of Botanical Extract Library for Inhibition of KHKC Activity.**

| Rxn ID  | Sample          |          |              | Sample<br>( OD <sub>340nm</sub> ) | Ave. No Fructose Controls<br>( OD <sub>340nm</sub> ) | Ave. Fructose Only Controls<br>( OD <sub>340nm</sub> ) | KHKC<br>Inhibition (%) |
|---------|-----------------|----------|--------------|-----------------------------------|------------------------------------------------------|--------------------------------------------------------|------------------------|
|         | Botanical Plate | Well     | Conc (µg/mL) |                                   |                                                      |                                                        |                        |
| Rxn #15 | FTL Plate 7     | A6: NFC  | -            | 0.063                             | 0.0661                                               | 0.520                                                  | 100.7                  |
| Rxn #15 | FTL Plate 7     | B6       | 50           | 0.510                             | 0.0661                                               | 0.520                                                  | 2.2                    |
| Rxn #15 | FTL Plate 7     | C6       | 50           | 0.517                             | 0.0661                                               | 0.520                                                  | 0.7                    |
| Rxn #15 | FTL Plate 7     | D6       | 50           | 0.390                             | 0.0661                                               | 0.520                                                  | 28.6                   |
| Rxn #15 | FTL Plate 7     | E6       | 50           | 0.480                             | 0.0661                                               | 0.520                                                  | 8.8                    |
| Rxn #15 | FTL Plate 7     | F6       | 50           | 0.538                             | 0.0661                                               | 0.520                                                  | -4.0                   |
| Rxn #15 | FTL Plate 7     | G6       | 50           | 0.499                             | 0.0661                                               | 0.520                                                  | 4.6                    |
| Rxn #15 | FTL Plate 7     | H6: FOC  | -            | 0.535                             | 0.0661                                               | 0.520                                                  | -3.3                   |
| Rxn #15 | FTL Plate 7     | A7: NFC  | -            | 0.079                             | 0.0661                                               | 0.520                                                  | 97.2                   |
| Rxn #15 | FTL Plate 7     | B7       | 50           | 0.527                             | 0.0661                                               | 0.520                                                  | -1.5                   |
| Rxn #15 | FTL Plate 7     | C7       | 50           | 0.374                             | 0.0661                                               | 0.520                                                  | 32.2                   |
| Rxn #15 | FTL Plate 7     | D7       | 50           | 0.536                             | 0.0661                                               | 0.520                                                  | -3.5                   |
| Rxn #15 | FTL Plate 7     | E7       | 50           | 0.463                             | 0.0661                                               | 0.520                                                  | 12.6                   |
| Rxn #15 | FTL Plate 7     | F7       | 50           | 0.493                             | 0.0661                                               | 0.520                                                  | 5.9                    |
| Rxn #15 | FTL Plate 7     | G7       | 50           | 0.495                             | 0.0661                                               | 0.520                                                  | 5.5                    |
| Rxn #15 | FTL Plate 7     | H7: FOC  | -            | 0.527                             | 0.0661                                               | 0.520                                                  | -1.5                   |
| Rxn #15 | FTL Plate 7     | A8: NFC  | -            | 0.069                             | 0.0661                                               | 0.520                                                  | 99.4                   |
| Rxn #15 | FTL Plate 7     | B8       | 50           | 0.506                             | 0.0661                                               | 0.520                                                  | 3.1                    |
| Rxn #15 | FTL Plate 7     | C8       | 50           | 0.509                             | 0.0661                                               | 0.520                                                  | 2.4                    |
| Rxn #15 | FTL Plate 7     | D8       | 50           | 0.489                             | 0.0661                                               | 0.520                                                  | 6.8                    |
| Rxn #15 | FTL Plate 7     | E8       | 50           | 0.532                             | 0.0661                                               | 0.520                                                  | -2.6                   |
| Rxn #15 | FTL Plate 7     | F8       | 50           | 0.484                             | 0.0661                                               | 0.520                                                  | 7.9                    |
| Rxn #15 | FTL Plate 7     | G8       | 50           | 0.456                             | 0.0661                                               | 0.520                                                  | 14.1                   |
| Rxn #15 | FTL Plate 7     | H8: FOC  | -            | 0.519                             | 0.0661                                               | 0.520                                                  | 0.2                    |
| Rxn #15 | FTL Plate 7     | A9: NFC  | -            | 0.064                             | 0.0661                                               | 0.520                                                  | 100.5                  |
| Rxn #15 | FTL Plate 7     | B9       | 50           | 0.476                             | 0.0661                                               | 0.520                                                  | 9.7                    |
| Rxn #15 | FTL Plate 7     | C9       | 50           | 0.502                             | 0.0661                                               | 0.520                                                  | 4.0                    |
| Rxn #15 | FTL Plate 7     | D9       | 50           | 0.436                             | 0.0661                                               | 0.520                                                  | 18.5                   |
| Rxn #15 | FTL Plate 7     | E9       | 50           | 0.520                             | 0.0661                                               | 0.520                                                  | 0.0                    |
| Rxn #15 | FTL Plate 7     | F9       | 50           | 0.523                             | 0.0661                                               | 0.520                                                  | -0.7                   |
| Rxn #15 | FTL Plate 7     | G9       | 50           | 0.500                             | 0.0661                                               | 0.520                                                  | 4.4                    |
| Rxn #15 | FTL Plate 7     | H9: FOC  | -            | 0.518                             | 0.0661                                               | 0.520                                                  | 0.4                    |
| Rxn #15 | FTL Plate 7     | A10: NFC | -            | 0.065                             | 0.0661                                               | 0.520                                                  | 100.2                  |
| Rxn #15 | FTL Plate 7     | B10      | 50           | 0.517                             | 0.0661                                               | 0.520                                                  | 0.7                    |
| Rxn #15 | FTL Plate 7     | C10      | 50           | 0.416                             | 0.0661                                               | 0.520                                                  | 22.9                   |
| Rxn #15 | FTL Plate 7     | D10      | 50           | 0.450                             | 0.0661                                               | 0.520                                                  | 15.4                   |
| Rxn #15 | FTL Plate 7     | E10      | 50           | 0.550                             | 0.0661                                               | 0.520                                                  | -6.6                   |
| Rxn #15 | FTL Plate 7     | F10      | 50           | 0.478                             | 0.0661                                               | 0.520                                                  | 9.3                    |
| Rxn #15 | FTL Plate 7     | G10      | 50           | 0.486                             | 0.0661                                               | 0.520                                                  | 7.5                    |
| Rxn #15 | FTL Plate 7     | H10: FOC | -            | 0.513                             | 0.0661                                               | 0.520                                                  | 1.5                    |
| Rxn #15 | FTL Plate 7     | A11: NFC | -            | 0.072                             | 0.0661                                               | 0.520                                                  | 98.7                   |
| Rxn #15 | FTL Plate 7     | B11      | 50           | 0.516                             | 0.0661                                               | 0.520                                                  | 0.9                    |
| Rxn #15 | FTL Plate 7     | C11      | 50           | 0.440                             | 0.0661                                               | 0.520                                                  | 17.6                   |
| Rxn #15 | FTL Plate 7     | D11      | 50           | 0.460                             | 0.0661                                               | 0.520                                                  | 13.2                   |
| Rxn #15 | FTL Plate 7     | E11      | 50           | 0.492                             | 0.0661                                               | 0.520                                                  | 6.2                    |
| Rxn #15 | FTL Plate 7     | F11      | 50           | 0.515                             | 0.0661                                               | 0.520                                                  | 1.1                    |
| Rxn #15 | FTL Plate 7     | G11      | 50           | 0.533                             | 0.0661                                               | 0.520                                                  | -2.9                   |
| Rxn #15 | FTL Plate 7     | H11: FOC | -            | 0.534                             | 0.0661                                               | 0.520                                                  | -3.1                   |
| Rxn #15 | FTL Plate 7     | A12: NFC | -            | 0.072                             | 0.0661                                               | 0.520                                                  | 98.7                   |
| Rxn #15 | FTL Plate 7     | H12: FOC | -            | 0.491                             | 0.0661                                               | 0.520                                                  | 6.4                    |
| Rxn #16 | FTL Plate 8     | A1: NFC  | -            | 0.067                             | 0.0650                                               | 0.538                                                  | 99.6                   |
| Rxn #16 | FTL Plate 8     | B1       | 50           | 0.526                             | 0.0650                                               | 0.538                                                  | 2.5                    |
| Rxn #16 | FTL Plate 8     | C1       | 50           | 0.498                             | 0.0650                                               | 0.538                                                  | 8.5                    |
| Rxn #16 | FTL Plate 8     | D1       | 50           | 0.466                             | 0.0650                                               | 0.538                                                  | 15.2                   |
| Rxn #16 | FTL Plate 8     | E1       | 50           | 0.542                             | 0.0650                                               | 0.538                                                  | -0.8                   |
| Rxn #16 | FTL Plate 8     | F1       | 50           | 0.524                             | 0.0650                                               | 0.538                                                  | 3.0                    |
| Rxn #16 | FTL Plate 8     | G1       | 50           | 0.530                             | 0.0650                                               | 0.538                                                  | 1.7                    |
| Rxn #16 | FTL Plate 8     | H1: FOC  | -            | 0.505                             | 0.0650                                               | 0.538                                                  | 7.0                    |
| Rxn #16 | FTL Plate 8     | A2: NFC  | -            | 0.079                             | 0.0650                                               | 0.538                                                  | 97.0                   |
| Rxn #16 | FTL Plate 8     | B2       | 50           | 0.599                             | 0.0650                                               | 0.538                                                  | -12.9                  |
| Rxn #16 | FTL Plate 8     | C2       | 50           | 0.506                             | 0.0650                                               | 0.538                                                  | 6.8                    |
| Rxn #16 | FTL Plate 8     | D2       | 50           | 0.529                             | 0.0650                                               | 0.538                                                  | 1.9                    |
| Rxn #16 | FTL Plate 8     | E2       | 50           | 0.589                             | 0.0650                                               | 0.538                                                  | -10.8                  |
| Rxn #16 | FTL Plate 8     | F2       | 50           | 0.555                             | 0.0650                                               | 0.538                                                  | -3.6                   |
| Rxn #16 | FTL Plate 8     | G2       | 50           | 0.523                             | 0.0650                                               | 0.538                                                  | 3.2                    |
| Rxn #16 | FTL Plate 8     | H2: FOC  | -            | 0.546                             | 0.0650                                               | 0.538                                                  | -1.7                   |
| Rxn #16 | FTL Plate 8     | A3: NFC  | -            | 0.062                             | 0.0650                                               | 0.538                                                  | 100.6                  |
| Rxn #16 | FTL Plate 8     | B3       | 50           | 0.549                             | 0.0650                                               | 0.538                                                  | -2.3                   |
| Rxn #16 | FTL Plate 8     | C3       | 50           | 0.548                             | 0.0650                                               | 0.538                                                  | -2.1                   |
| Rxn #16 | FTL Plate 8     | D3       | 50           | 0.555                             | 0.0650                                               | 0.538                                                  | -3.6                   |

**S1 Table. Data from Screening of Botanical Extract Library for Inhibition of KHKC Activity.**

| Rxn ID  | Sample          |          |              | Sample<br>( OD <sub>340nm</sub> ) | Ave. No Fructose Controls<br>( OD <sub>340nm</sub> ) | Ave. Fructose Only Controls<br>( OD <sub>340nm</sub> ) | KHKC<br>Inhibition (%) |
|---------|-----------------|----------|--------------|-----------------------------------|------------------------------------------------------|--------------------------------------------------------|------------------------|
|         | Botanical Plate | Well     | Conc (µg/mL) |                                   |                                                      |                                                        |                        |
| Rxn #16 | FTL Plate 8     | E3       | 50           | 0.548                             | 0.0650                                               | 0.538                                                  | -2.1                   |
| Rxn #16 | FTL Plate 8     | F3       | 50           | 0.560                             | 0.0650                                               | 0.538                                                  | -4.7                   |
| Rxn #16 | FTL Plate 8     | G3       | 50           | 0.577                             | 0.0650                                               | 0.538                                                  | -8.2                   |
| Rxn #16 | FTL Plate 8     | H3: FOC  | -            | 0.552                             | 0.0650                                               | 0.538                                                  | -3.0                   |
| Rxn #16 | FTL Plate 8     | A4: NFC  | -            | 0.065                             | 0.0650                                               | 0.538                                                  | 100.0                  |
| Rxn #16 | FTL Plate 8     | B4       | 50           | 0.583                             | 0.0650                                               | 0.538                                                  | -9.5                   |
| Rxn #16 | FTL Plate 8     | C4       | 50           | 0.588                             | 0.0650                                               | 0.538                                                  | -10.6                  |
| Rxn #16 | FTL Plate 8     | D4       | 50           | 0.511                             | 0.0650                                               | 0.538                                                  | 5.7                    |
| Rxn #16 | FTL Plate 8     | E4       | 50           | 0.541                             | 0.0650                                               | 0.538                                                  | -0.6                   |
| Rxn #16 | FTL Plate 8     | F4       | 50           | 0.565                             | 0.0650                                               | 0.538                                                  | -5.7                   |
| Rxn #16 | FTL Plate 8     | G4       | 50           | 0.562                             | 0.0650                                               | 0.538                                                  | -5.1                   |
| Rxn #16 | FTL Plate 8     | H4: FOC  | -            | 0.535                             | 0.0650                                               | 0.538                                                  | 0.6                    |
| Rxn #16 | FTL Plate 8     | A5: NFC  | -            | 0.064                             | 0.0650                                               | 0.538                                                  | 100.2                  |
| Rxn #16 | FTL Plate 8     | B5: NFC  | -            | 0.054                             | 0.0650                                               | 0.538                                                  | 102.3                  |
| Rxn #16 | FTL Plate 8     | C5: NFC  | -            | 0.053                             | 0.0650                                               | 0.538                                                  | 102.5                  |
| Rxn #16 | FTL Plate 8     | D5: NFC  | -            | 0.046                             | 0.0650                                               | 0.538                                                  | 104.0                  |
| Rxn #16 | FTL Plate 8     | E5: FOC  | -            | 0.546                             | 0.0650                                               | 0.538                                                  | -1.7                   |
| Rxn #16 | FTL Plate 8     | F5: FOC  | -            | 0.571                             | 0.0650                                               | 0.538                                                  | -7.0                   |
| Rxn #16 | FTL Plate 8     | G5: FOC  | -            | 0.535                             | 0.0650                                               | 0.538                                                  | 0.6                    |
| Rxn #16 | FTL Plate 8     | H5: FOC  | -            | 0.550                             | 0.0650                                               | 0.538                                                  | -2.5                   |
| Rxn #16 | FTL Plate 8     | A6: NFC  | -            | 0.073                             | 0.0650                                               | 0.538                                                  | 98.3                   |
| Rxn #16 | FTL Plate 8     | B6       | 50           | 0.584                             | 0.0650                                               | 0.538                                                  | -9.7                   |
| Rxn #16 | FTL Plate 8     | C6       | 50           | 0.548                             | 0.0650                                               | 0.538                                                  | -2.1                   |
| Rxn #16 | FTL Plate 8     | D6       | 50           | 0.538                             | 0.0650                                               | 0.538                                                  | 0.0                    |
| Rxn #16 | FTL Plate 8     | E6       | 50           | 0.557                             | 0.0650                                               | 0.538                                                  | -4.0                   |
| Rxn #16 | FTL Plate 8     | F6       | 50           | 0.519                             | 0.0650                                               | 0.538                                                  | 4.0                    |
| Rxn #16 | FTL Plate 8     | G6       | 50           | 0.591                             | 0.0650                                               | 0.538                                                  | -11.2                  |
| Rxn #16 | FTL Plate 8     | H6: FOC  | -            | 0.525                             | 0.0650                                               | 0.538                                                  | 2.7                    |
| Rxn #16 | FTL Plate 8     | A7: NFC  | -            | 0.069                             | 0.0650                                               | 0.538                                                  | 99.2                   |
| Rxn #16 | FTL Plate 8     | B7       | 50           | 0.574                             | 0.0650                                               | 0.538                                                  | -7.6                   |
| Rxn #16 | FTL Plate 8     | C7       | 50           | 0.571                             | 0.0650                                               | 0.538                                                  | -7.0                   |
| Rxn #16 | FTL Plate 8     | D7       | 50           | 0.466                             | 0.0650                                               | 0.538                                                  | 15.2                   |
| Rxn #16 | FTL Plate 8     | E7       | 50           | 0.577                             | 0.0650                                               | 0.538                                                  | -8.2                   |
| Rxn #16 | FTL Plate 8     | F7       | 50           | 0.546                             | 0.0650                                               | 0.538                                                  | -1.7                   |
| Rxn #16 | FTL Plate 8     | G7       | 50           | 0.545                             | 0.0650                                               | 0.538                                                  | -1.5                   |
| Rxn #16 | FTL Plate 8     | H7: FOC  | -            | 0.529                             | 0.0650                                               | 0.538                                                  | 1.9                    |
| Rxn #16 | FTL Plate 8     | A8: NFC  | -            | 0.070                             | 0.0650                                               | 0.538                                                  | 98.9                   |
| Rxn #16 | FTL Plate 8     | B8       | 50           | 0.520                             | 0.0650                                               | 0.538                                                  | 3.8                    |
| Rxn #16 | FTL Plate 8     | C8       | 50           | 0.549                             | 0.0650                                               | 0.538                                                  | -2.3                   |
| Rxn #16 | FTL Plate 8     | D8       | 50           | 0.539                             | 0.0650                                               | 0.538                                                  | -0.2                   |
| Rxn #16 | FTL Plate 8     | E8       | 50           | 0.550                             | 0.0650                                               | 0.538                                                  | -2.5                   |
| Rxn #16 | FTL Plate 8     | F8       | 50           | 0.544                             | 0.0650                                               | 0.538                                                  | -1.3                   |
| Rxn #16 | FTL Plate 8     | G8       | 50           | 0.553                             | 0.0650                                               | 0.538                                                  | -3.2                   |
| Rxn #16 | FTL Plate 8     | H8: FOC  | -            | 0.544                             | 0.0650                                               | 0.538                                                  | -1.3                   |
| Rxn #16 | FTL Plate 8     | A9: NFC  | -            | 0.068                             | 0.0650                                               | 0.538                                                  | 99.4                   |
| Rxn #16 | FTL Plate 8     | B9       | 50           | 0.370                             | 0.0650                                               | 0.538                                                  | 35.5                   |
| Rxn #16 | FTL Plate 8     | C9       | 50           | 0.535                             | 0.0650                                               | 0.538                                                  | 0.6                    |
| Rxn #16 | FTL Plate 8     | D9       | 50           | 0.536                             | 0.0650                                               | 0.538                                                  | 0.4                    |
| Rxn #16 | FTL Plate 8     | E9       | 50           | 0.483                             | 0.0650                                               | 0.538                                                  | 11.6                   |
| Rxn #16 | FTL Plate 8     | F9       | 50           | 0.529                             | 0.0650                                               | 0.538                                                  | 1.9                    |
| Rxn #16 | FTL Plate 8     | G9       | 50           | 0.519                             | 0.0650                                               | 0.538                                                  | 4.0                    |
| Rxn #16 | FTL Plate 8     | H9: FOC  | -            | 0.529                             | 0.0650                                               | 0.538                                                  | 1.9                    |
| Rxn #16 | FTL Plate 8     | A10: NFC | -            | 0.062                             | 0.0650                                               | 0.538                                                  | 100.6                  |
| Rxn #16 | FTL Plate 8     | B10      | 50           | 0.567                             | 0.0650                                               | 0.538                                                  | -6.1                   |
| Rxn #16 | FTL Plate 8     | C10      | 50           | 0.559                             | 0.0650                                               | 0.538                                                  | -4.4                   |
| Rxn #16 | FTL Plate 8     | D10      | 50           | 0.521                             | 0.0650                                               | 0.538                                                  | 3.6                    |
| Rxn #16 | FTL Plate 8     | E10      | 50           | 0.555                             | 0.0650                                               | 0.538                                                  | -3.6                   |
| Rxn #16 | FTL Plate 8     | F10      | 50           | 0.527                             | 0.0650                                               | 0.538                                                  | 2.3                    |
| Rxn #16 | FTL Plate 8     | G10      | 50           | 0.531                             | 0.0650                                               | 0.538                                                  | 1.5                    |
| Rxn #16 | FTL Plate 8     | H10: FOC | -            | 0.528                             | 0.0650                                               | 0.538                                                  | 2.1                    |
| Rxn #16 | FTL Plate 8     | A11: NFC | -            | 0.063                             | 0.0650                                               | 0.538                                                  | 100.4                  |
| Rxn #16 | FTL Plate 8     | B11      | 50           | 0.552                             | 0.0650                                               | 0.538                                                  | -3.0                   |
| Rxn #16 | FTL Plate 8     | C11      | 50           | 0.284                             | 0.0650                                               | 0.538                                                  | 53.7                   |
| Rxn #16 | FTL Plate 8     | D11      | 50           | 0.537                             | 0.0650                                               | 0.538                                                  | 0.2                    |
| Rxn #16 | FTL Plate 8     | E11      | 50           | 0.528                             | 0.0650                                               | 0.538                                                  | 2.1                    |
| Rxn #16 | FTL Plate 8     | F11      | 50           | 0.504                             | 0.0650                                               | 0.538                                                  | 7.2                    |
| Rxn #16 | FTL Plate 8     | G11      | 50           | 0.531                             | 0.0650                                               | 0.538                                                  | 1.5                    |
| Rxn #16 | FTL Plate 8     | H11: FOC | -            | 0.536                             | 0.0650                                               | 0.538                                                  | 0.4                    |
| Rxn #16 | FTL Plate 8     | A12: NFC | -            | 0.080                             | 0.0650                                               | 0.538                                                  | 96.8                   |
| Rxn #16 | FTL Plate 8     | H12: FOC | -            | 0.538                             | 0.0650                                               | 0.538                                                  | 0.0                    |

**S1 Table. Data from Screening of Botanical Extract Library for Inhibition of KHKC Activity.**

| Rxn ID  | Sample          |         |              | Sample<br>( OD <sub>340nm</sub> ) | Ave. No Fructose Controls<br>( OD <sub>340nm</sub> ) | Ave. Fructose Only Controls<br>( OD <sub>340nm</sub> ) | KHKC<br>Inhibition (%) |
|---------|-----------------|---------|--------------|-----------------------------------|------------------------------------------------------|--------------------------------------------------------|------------------------|
|         | Botanical Plate | Well    | Conc (µg/mL) |                                   |                                                      |                                                        |                        |
| Rxn #17 | FTL Plate 23    | A1: NFC | -            | 0.085                             | 0.0783                                               | 0.560                                                  | 98.6                   |
| Rxn #17 | FTL Plate 23    | B1      | 50           | 0.500                             | 0.0783                                               | 0.560                                                  | 12.5                   |
| Rxn #17 | FTL Plate 23    | C1      | 50           | 0.484                             | 0.0783                                               | 0.560                                                  | 15.8                   |
| Rxn #17 | FTL Plate 23    | D1      | 50           | 0.513                             | 0.0783                                               | 0.560                                                  | 9.8                    |
| Rxn #17 | FTL Plate 23    | E1      | 50           | 0.502                             | 0.0783                                               | 0.560                                                  | 12.0                   |
| Rxn #17 | FTL Plate 23    | F1      | 50           | 0.424                             | 0.0783                                               | 0.560                                                  | 28.2                   |
| Rxn #17 | FTL Plate 23    | G1      | 50           | 0.525                             | 0.0783                                               | 0.560                                                  | 7.3                    |
| Rxn #17 | FTL Plate 23    | H1: FOC | -            | 0.559                             | 0.0783                                               | 0.560                                                  | 0.2                    |
| Rxn #17 | FTL Plate 23    | A2: NFC | -            | 0.086                             | 0.0783                                               | 0.560                                                  | 98.4                   |
| Rxn #17 | FTL Plate 23    | B2      | 50           | 0.523                             | 0.0783                                               | 0.560                                                  | 7.7                    |
| Rxn #17 | FTL Plate 23    | C2      | 50           | 0.534                             | 0.0783                                               | 0.560                                                  | 5.4                    |
| Rxn #17 | FTL Plate 23    | D2      | 50           | 0.469                             | 0.0783                                               | 0.560                                                  | 18.9                   |
| Rxn #17 | FTL Plate 23    | E2      | 50           | 0.445                             | 0.0783                                               | 0.560                                                  | 23.9                   |
| Rxn #17 | FTL Plate 23    | F2      | 50           | 0.516                             | 0.0783                                               | 0.560                                                  | 9.1                    |
| Rxn #17 | FTL Plate 23    | G2      | 50           | 0.502                             | 0.0783                                               | 0.560                                                  | 12.0                   |
| Rxn #17 | FTL Plate 23    | H2: FOC | -            | 0.574                             | 0.0783                                               | 0.560                                                  | -2.9                   |
| Rxn #17 | FTL Plate 23    | A3: NFC | -            | 0.087                             | 0.0783                                               | 0.560                                                  | 98.2                   |
| Rxn #17 | FTL Plate 23    | B3      | 50           | 0.553                             | 0.0783                                               | 0.560                                                  | 1.5                    |
| Rxn #17 | FTL Plate 23    | C3      | 50           | 0.506                             | 0.0783                                               | 0.560                                                  | 11.2                   |
| Rxn #17 | FTL Plate 23    | D3      | 50           | 0.547                             | 0.0783                                               | 0.560                                                  | 2.7                    |
| Rxn #17 | FTL Plate 23    | E3      | 50           | 0.536                             | 0.0783                                               | 0.560                                                  | 5.0                    |
| Rxn #17 | FTL Plate 23    | F3      | 50           | 0.525                             | 0.0783                                               | 0.560                                                  | 7.3                    |
| Rxn #17 | FTL Plate 23    | G3      | 50           | 0.648                             | 0.0783                                               | 0.560                                                  | -18.3                  |
| Rxn #17 | FTL Plate 23    | H3: FOC | -            | 0.575                             | 0.0783                                               | 0.560                                                  | -3.1                   |
| Rxn #17 | FTL Plate 23    | A4: NFC | -            | 0.093                             | 0.0783                                               | 0.560                                                  | 96.9                   |
| Rxn #17 | FTL Plate 23    | B4      | 50           | 0.575                             | 0.0783                                               | 0.560                                                  | -3.1                   |
| Rxn #17 | FTL Plate 23    | C4      | 50           | 0.544                             | 0.0783                                               | 0.560                                                  | 3.3                    |
| Rxn #17 | FTL Plate 23    | D4      | 50           | 0.548                             | 0.0783                                               | 0.560                                                  | 2.5                    |
| Rxn #17 | FTL Plate 23    | E4      | 50           | 0.556                             | 0.0783                                               | 0.560                                                  | 0.8                    |
| Rxn #17 | FTL Plate 23    | F4      | 50           | 0.562                             | 0.0783                                               | 0.560                                                  | -0.4                   |
| Rxn #17 | FTL Plate 23    | G4      | 50           | 0.568                             | 0.0783                                               | 0.560                                                  | -1.7                   |
| Rxn #17 | FTL Plate 23    | H4: FOC | -            | 0.567                             | 0.0783                                               | 0.560                                                  | -1.5                   |
| Rxn #17 | FTL Plate 23    | A5: NFC | -            | 0.091                             | 0.0783                                               | 0.560                                                  | 97.4                   |
| Rxn #17 | FTL Plate 23    | B5: NFC | -            | 0.075                             | 0.0783                                               | 0.560                                                  | 100.7                  |
| Rxn #17 | FTL Plate 23    | C5: NFC | -            | 0.076                             | 0.0783                                               | 0.560                                                  | 100.5                  |
| Rxn #17 | FTL Plate 23    | D5: NFC | -            | 0.073                             | 0.0783                                               | 0.560                                                  | 101.1                  |
| Rxn #17 | FTL Plate 23    | E5: FOC | -            | 0.561                             | 0.0783                                               | 0.560                                                  | -0.2                   |
| Rxn #17 | FTL Plate 23    | F5: FOC | -            | 0.556                             | 0.0783                                               | 0.560                                                  | 0.8                    |
| Rxn #17 | FTL Plate 23    | G5: FOC | -            | 0.551                             | 0.0783                                               | 0.560                                                  | 1.9                    |
| Rxn #17 | FTL Plate 23    | H5: FOC | -            | 0.542                             | 0.0783                                               | 0.560                                                  | 3.7                    |
| Rxn #17 | FTL Plate 23    | A6: NFC | -            | 0.083                             | 0.0783                                               | 0.560                                                  | 99.0                   |
| Rxn #17 | FTL Plate 23    | B6      | 50           | 0.554                             | 0.0783                                               | 0.560                                                  | 1.2                    |
| Rxn #17 | FTL Plate 23    | C6      | 50           | 0.394                             | 0.0783                                               | 0.560                                                  | 34.5                   |
| Rxn #17 | FTL Plate 23    | D6      | 50           | 0.560                             | 0.0783                                               | 0.560                                                  | 0.0                    |
| Rxn #17 | FTL Plate 23    | E6      | 50           | 0.537                             | 0.0783                                               | 0.560                                                  | 4.8                    |
| Rxn #17 | FTL Plate 23    | F6      | 50           | 0.551                             | 0.0783                                               | 0.560                                                  | 1.9                    |
| Rxn #17 | FTL Plate 23    | G6      | 50           | 0.566                             | 0.0783                                               | 0.560                                                  | -1.2                   |
| Rxn #17 | FTL Plate 23    | H6: FOC | -            | 0.568                             | 0.0783                                               | 0.560                                                  | -1.7                   |
| Rxn #17 | FTL Plate 23    | A7: NFC | -            | 0.089                             | 0.0783                                               | 0.560                                                  | 97.8                   |
| Rxn #17 | FTL Plate 23    | B7      | 50           | 0.458                             | 0.0783                                               | 0.560                                                  | 21.2                   |
| Rxn #17 | FTL Plate 23    | C7      | 50           | 0.551                             | 0.0783                                               | 0.560                                                  | 1.9                    |
| Rxn #17 | FTL Plate 23    | D7      | 50           | 0.549                             | 0.0783                                               | 0.560                                                  | 2.3                    |
| Rxn #17 | FTL Plate 23    | E7      | 50           | 0.545                             | 0.0783                                               | 0.560                                                  | 3.1                    |
| Rxn #17 | FTL Plate 23    | F7      | 50           | 0.530                             | 0.0783                                               | 0.560                                                  | 6.2                    |
| Rxn #17 | FTL Plate 23    | G7      | 50           | 0.524                             | 0.0783                                               | 0.560                                                  | 7.5                    |
| Rxn #17 | FTL Plate 23    | H7: FOC | -            | 0.569                             | 0.0783                                               | 0.560                                                  | -1.9                   |
| Rxn #17 | FTL Plate 23    | A8: NFC | -            | 0.080                             | 0.0783                                               | 0.560                                                  | 99.6                   |
| Rxn #17 | FTL Plate 23    | B8      | 50           | 0.549                             | 0.0783                                               | 0.560                                                  | 2.3                    |
| Rxn #17 | FTL Plate 23    | C8      | 50           | 0.638                             | 0.0783                                               | 0.560                                                  | -16.2                  |
| Rxn #17 | FTL Plate 23    | D8      | 50           | 0.449                             | 0.0783                                               | 0.560                                                  | 23.0                   |
| Rxn #17 | FTL Plate 23    | E8      | 50           | 0.548                             | 0.0783                                               | 0.560                                                  | 2.5                    |
| Rxn #17 | FTL Plate 23    | F8      | 50           | 0.529                             | 0.0783                                               | 0.560                                                  | 6.4                    |
| Rxn #17 | FTL Plate 23    | G8      | 50           | 0.543                             | 0.0783                                               | 0.560                                                  | 3.5                    |
| Rxn #17 | FTL Plate 23    | H8: FOC | -            | 0.549                             | 0.0783                                               | 0.560                                                  | 2.3                    |
| Rxn #17 | FTL Plate 23    | A9: NFC | -            | 0.072                             | 0.0783                                               | 0.560                                                  | 101.3                  |
| Rxn #17 | FTL Plate 23    | B9      | 50           | 0.536                             | 0.0783                                               | 0.560                                                  | 5.0                    |
| Rxn #17 | FTL Plate 23    | C9      | 50           | 0.418                             | 0.0783                                               | 0.560                                                  | 29.5                   |
| Rxn #17 | FTL Plate 23    | D9      | 50           | 0.439                             | 0.0783                                               | 0.560                                                  | 25.1                   |
| Rxn #17 | FTL Plate 23    | E9      | 50           | 0.473                             | 0.0783                                               | 0.560                                                  | 18.1                   |
| Rxn #17 | FTL Plate 23    | F9      | 50           | 0.384                             | 0.0783                                               | 0.560                                                  | 36.5                   |

**S1 Table. Data from Screening of Botanical Extract Library for Inhibition of KHKC Activity.**

| Rxn ID  | Sample          |          |              | Sample<br>( OD <sub>340nm</sub> ) | Ave. No Fructose Controls<br>( OD <sub>340nm</sub> ) | Ave. Fructose Only Controls<br>( OD <sub>340nm</sub> ) | KHKC<br>Inhibition (%) |
|---------|-----------------|----------|--------------|-----------------------------------|------------------------------------------------------|--------------------------------------------------------|------------------------|
|         | Botanical Plate | Well     | Conc (µg/mL) |                                   |                                                      |                                                        |                        |
| Rxn #17 | FTL Plate 23    | G9       | 50           | 0.424                             | 0.0783                                               | 0.560                                                  | 28.2                   |
| Rxn #17 | FTL Plate 23    | H9: FOC  | -            | 0.552                             | 0.0783                                               | 0.560                                                  | 1.7                    |
| Rxn #17 | FTL Plate 23    | A10: NFC | -            | 0.050                             | 0.0783                                               | 0.560                                                  | 105.9                  |
| Rxn #17 | FTL Plate 23    | B10      | 50           | 0.430                             | 0.0783                                               | 0.560                                                  | 27.0                   |
| Rxn #17 | FTL Plate 23    | C10      | 50           | 0.454                             | 0.0783                                               | 0.560                                                  | 22.0                   |
| Rxn #17 | FTL Plate 23    | D10      | 50           | 0.480                             | 0.0783                                               | 0.560                                                  | 16.6                   |
| Rxn #17 | FTL Plate 23    | E10      | 50           | 0.384                             | 0.0783                                               | 0.560                                                  | 36.5                   |
| Rxn #17 | FTL Plate 23    | F10      | 50           | 0.424                             | 0.0783                                               | 0.560                                                  | 28.2                   |
| Rxn #17 | FTL Plate 23    | G10      | 50           | 0.361                             | 0.0783                                               | 0.560                                                  | 41.3                   |
| Rxn #17 | FTL Plate 23    | H10: FOC | -            | 0.580                             | 0.0783                                               | 0.560                                                  | -4.2                   |
| Rxn #17 | FTL Plate 23    | A11: NFC | -            | 0.075                             | 0.0783                                               | 0.560                                                  | 100.7                  |
| Rxn #17 | FTL Plate 23    | B11      | 50           | 0.409                             | 0.0783                                               | 0.560                                                  | 31.3                   |
| Rxn #17 | FTL Plate 23    | C11      | 50           | 0.524                             | 0.0783                                               | 0.560                                                  | 7.5                    |
| Rxn #17 | FTL Plate 23    | D11      | 50           | 0.485                             | 0.0783                                               | 0.560                                                  | 15.6                   |
| Rxn #17 | FTL Plate 23    | E11      | 50           | 0.394                             | 0.0783                                               | 0.560                                                  | 34.5                   |
| Rxn #17 | FTL Plate 23    | F11      | 50           | 0.408                             | 0.0783                                               | 0.560                                                  | 31.6                   |
| Rxn #17 | FTL Plate 23    | G11      | 50           | 0.472                             | 0.0783                                               | 0.560                                                  | 18.3                   |
| Rxn #17 | FTL Plate 23    | H11: FOC | -            | 0.530                             | 0.0783                                               | 0.560                                                  | 6.2                    |
| Rxn #17 | FTL Plate 23    | A12: NFC | -            | 0.060                             | 0.0783                                               | 0.560                                                  | 103.8                  |
| Rxn #17 | FTL Plate 23    | H12: FOC | -            | 0.567                             | 0.0783                                               | 0.560                                                  | -1.5                   |
| Rxn #18 | FTL Plate 24    | A1: NFC  | -            | 0.075                             | 0.0731                                               | 0.509                                                  | 99.6                   |
| Rxn #18 | FTL Plate 24    | B1       | 50           | 0.464                             | 0.0731                                               | 0.509                                                  | 10.3                   |
| Rxn #18 | FTL Plate 24    | C1       | 50           | 0.481                             | 0.0731                                               | 0.509                                                  | 6.4                    |
| Rxn #18 | FTL Plate 24    | D1       | 50           | 0.429                             | 0.0731                                               | 0.509                                                  | 18.4                   |
| Rxn #18 | FTL Plate 24    | E1       | 50           | 0.474                             | 0.0731                                               | 0.509                                                  | 8.0                    |
| Rxn #18 | FTL Plate 24    | F1       | 50           | 0.471                             | 0.0731                                               | 0.509                                                  | 8.7                    |
| Rxn #18 | FTL Plate 24    | G1       | 50           | 0.430                             | 0.0731                                               | 0.509                                                  | 18.1                   |
| Rxn #18 | FTL Plate 24    | H1: FOC  | -            | 0.507                             | 0.0731                                               | 0.509                                                  | 0.5                    |
| Rxn #18 | FTL Plate 24    | A2: NFC  | -            | 0.077                             | 0.0731                                               | 0.509                                                  | 99.1                   |
| Rxn #18 | FTL Plate 24    | B2       | 50           | 0.502                             | 0.0731                                               | 0.509                                                  | 1.6                    |
| Rxn #18 | FTL Plate 24    | C2       | 50           | 0.446                             | 0.0731                                               | 0.509                                                  | 14.5                   |
| Rxn #18 | FTL Plate 24    | D2       | 50           | 0.338                             | 0.0731                                               | 0.509                                                  | 39.2                   |
| Rxn #18 | FTL Plate 24    | E2       | 50           | 0.519                             | 0.0731                                               | 0.509                                                  | -2.3                   |
| Rxn #18 | FTL Plate 24    | F2       | 50           | 0.460                             | 0.0731                                               | 0.509                                                  | 11.2                   |
| Rxn #18 | FTL Plate 24    | G2       | 50           | 0.472                             | 0.0731                                               | 0.509                                                  | 8.5                    |
| Rxn #18 | FTL Plate 24    | H2: FOC  | -            | 0.501                             | 0.0731                                               | 0.509                                                  | 1.8                    |
| Rxn #18 | FTL Plate 24    | A3: NFC  | -            | 0.071                             | 0.0731                                               | 0.509                                                  | 100.5                  |
| Rxn #18 | FTL Plate 24    | B3       | 50           | 0.437                             | 0.0731                                               | 0.509                                                  | 16.5                   |
| Rxn #18 | FTL Plate 24    | C3       | 50           | 0.422                             | 0.0731                                               | 0.509                                                  | 20.0                   |
| Rxn #18 | FTL Plate 24    | D3       | 50           | 0.482                             | 0.0731                                               | 0.509                                                  | 6.2                    |
| Rxn #18 | FTL Plate 24    | E3       | 50           | 0.381                             | 0.0731                                               | 0.509                                                  | 29.4                   |
| Rxn #18 | FTL Plate 24    | F3       | 50           | 0.477                             | 0.0731                                               | 0.509                                                  | 7.3                    |
| Rxn #18 | FTL Plate 24    | G3       | 50           | 0.496                             | 0.0731                                               | 0.509                                                  | 3.0                    |
| Rxn #18 | FTL Plate 24    | H3: FOC  | -            | 0.509                             | 0.0731                                               | 0.509                                                  | 0.0                    |
| Rxn #18 | FTL Plate 24    | A4: NFC  | -            | 0.074                             | 0.0731                                               | 0.509                                                  | 99.8                   |
| Rxn #18 | FTL Plate 24    | B4       | 50           | 0.512                             | 0.0731                                               | 0.509                                                  | -0.7                   |
| Rxn #18 | FTL Plate 24    | C4       | 50           | 0.516                             | 0.0731                                               | 0.509                                                  | -1.6                   |
| Rxn #18 | FTL Plate 24    | D4       | 50           | 0.481                             | 0.0731                                               | 0.509                                                  | 6.4                    |
| Rxn #18 | FTL Plate 24    | E4       | 50           | 0.444                             | 0.0731                                               | 0.509                                                  | 14.9                   |
| Rxn #18 | FTL Plate 24    | F4       | 50           | 0.492                             | 0.0731                                               | 0.509                                                  | 3.9                    |
| Rxn #18 | FTL Plate 24    | G4       | 50           | 0.499                             | 0.0731                                               | 0.509                                                  | 2.3                    |
| Rxn #18 | FTL Plate 24    | H4: FOC  | -            | 0.507                             | 0.0731                                               | 0.509                                                  | 0.5                    |
| Rxn #18 | FTL Plate 24    | A5: NFC  | -            | 0.075                             | 0.0731                                               | 0.509                                                  | 99.6                   |
| Rxn #18 | FTL Plate 24    | B5: NFC  | -            | 0.061                             | 0.0731                                               | 0.509                                                  | 102.8                  |
| Rxn #18 | FTL Plate 24    | C5: NFC  | -            | 0.066                             | 0.0731                                               | 0.509                                                  | 101.6                  |
| Rxn #18 | FTL Plate 24    | D5: NFC  | -            | 0.055                             | 0.0731                                               | 0.509                                                  | 104.2                  |
| Rxn #18 | FTL Plate 24    | E5: FOC  | -            | 0.496                             | 0.0731                                               | 0.509                                                  | 3.0                    |
| Rxn #18 | FTL Plate 24    | F5: FOC  | -            | 0.503                             | 0.0731                                               | 0.509                                                  | 1.4                    |
| Rxn #18 | FTL Plate 24    | G5: FOC  | -            | 0.507                             | 0.0731                                               | 0.509                                                  | 0.5                    |
| Rxn #18 | FTL Plate 24    | H5: FOC  | -            | 0.507                             | 0.0731                                               | 0.509                                                  | 0.5                    |
| Rxn #18 | FTL Plate 24    | A6: NFC  | -            | 0.065                             | 0.0731                                               | 0.509                                                  | 101.9                  |
| Rxn #18 | FTL Plate 24    | B6       | 50           | 0.515                             | 0.0731                                               | 0.509                                                  | -1.4                   |
| Rxn #18 | FTL Plate 24    | C6       | 50           | 0.371                             | 0.0731                                               | 0.509                                                  | 31.7                   |
| Rxn #18 | FTL Plate 24    | D6       | 50           | 0.508                             | 0.0731                                               | 0.509                                                  | 0.2                    |
| Rxn #18 | FTL Plate 24    | E6       | 50           | 0.488                             | 0.0731                                               | 0.509                                                  | 4.8                    |
| Rxn #18 | FTL Plate 24    | F6       | 50           | 0.510                             | 0.0731                                               | 0.509                                                  | -0.2                   |
| Rxn #18 | FTL Plate 24    | G6       | 50           | 0.504                             | 0.0731                                               | 0.509                                                  | 1.1                    |
| Rxn #18 | FTL Plate 24    | H6: FOC  | -            | 0.513                             | 0.0731                                               | 0.509                                                  | -0.9                   |
| Rxn #18 | FTL Plate 24    | A7: NFC  | -            | 0.072                             | 0.0731                                               | 0.509                                                  | 100.3                  |
| Rxn #18 | FTL Plate 24    | B7       | 50           | 0.491                             | 0.0731                                               | 0.509                                                  | 4.1                    |

**S1 Table. Data from Screening of Botanical Extract Library for Inhibition of KHKC Activity.**

| Rxn ID  | Sample          |          |              | Sample<br>( OD <sub>340nm</sub> ) | Ave. No Fructose Controls<br>( OD <sub>340nm</sub> ) | Ave. Fructose Only Controls<br>( OD <sub>340nm</sub> ) | KHKC<br>Inhibition (%) |
|---------|-----------------|----------|--------------|-----------------------------------|------------------------------------------------------|--------------------------------------------------------|------------------------|
|         | Botanical Plate | Well     | Conc (µg/mL) |                                   |                                                      |                                                        |                        |
| Rxn #18 | FTL Plate 24    | C7       | 50           | 0.514                             | 0.0731                                               | 0.509                                                  | -1.1                   |
| Rxn #18 | FTL Plate 24    | D7       | 50           | 0.452                             | 0.0731                                               | 0.509                                                  | 13.1                   |
| Rxn #18 | FTL Plate 24    | E7       | 50           | 0.485                             | 0.0731                                               | 0.509                                                  | 5.5                    |
| Rxn #18 | FTL Plate 24    | F7       | 50           | 0.503                             | 0.0731                                               | 0.509                                                  | 1.4                    |
| Rxn #18 | FTL Plate 24    | G7       | 50           | 0.410                             | 0.0731                                               | 0.509                                                  | 22.7                   |
| Rxn #18 | FTL Plate 24    | H7: FOC  | -            | 0.525                             | 0.0731                                               | 0.509                                                  | -3.7                   |
| Rxn #18 | FTL Plate 24    | A8: NFC  | -            | 0.080                             | 0.0731                                               | 0.509                                                  | 98.4                   |
| Rxn #18 | FTL Plate 24    | B8       | 50           | 0.484                             | 0.0731                                               | 0.509                                                  | 5.7                    |
| Rxn #18 | FTL Plate 24    | C8       | 50           | 0.509                             | 0.0731                                               | 0.509                                                  | 0.0                    |
| Rxn #18 | FTL Plate 24    | D8       | 50           | 0.457                             | 0.0731                                               | 0.509                                                  | 11.9                   |
| Rxn #18 | FTL Plate 24    | E8       | 50           | 0.470                             | 0.0731                                               | 0.509                                                  | 8.9                    |
| Rxn #18 | FTL Plate 24    | F8       | 50           | 0.496                             | 0.0731                                               | 0.509                                                  | 3.0                    |
| Rxn #18 | FTL Plate 24    | G8       | 50           | 0.523                             | 0.0731                                               | 0.509                                                  | -3.2                   |
| Rxn #18 | FTL Plate 24    | H8: FOC  | -            | 0.514                             | 0.0731                                               | 0.509                                                  | -1.1                   |
| Rxn #18 | FTL Plate 24    | A9: NFC  | -            | 0.077                             | 0.0731                                               | 0.509                                                  | 99.1                   |
| Rxn #18 | FTL Plate 24    | B9       | 50           | 0.505                             | 0.0731                                               | 0.509                                                  | 0.9                    |
| Rxn #18 | FTL Plate 24    | C9       | 50           | 0.482                             | 0.0731                                               | 0.509                                                  | 6.2                    |
| Rxn #18 | FTL Plate 24    | D9       | 50           | 0.480                             | 0.0731                                               | 0.509                                                  | 6.7                    |
| Rxn #18 | FTL Plate 24    | E9       | 50           | 0.506                             | 0.0731                                               | 0.509                                                  | 0.7                    |
| Rxn #18 | FTL Plate 24    | F9       | 50           | 0.447                             | 0.0731                                               | 0.509                                                  | 14.2                   |
| Rxn #18 | FTL Plate 24    | G9       | 50           | 0.511                             | 0.0731                                               | 0.509                                                  | -0.5                   |
| Rxn #18 | FTL Plate 24    | H9: FOC  | -            | 0.512                             | 0.0731                                               | 0.509                                                  | -0.7                   |
| Rxn #18 | FTL Plate 24    | A10: NFC | -            | 0.076                             | 0.0731                                               | 0.509                                                  | 99.3                   |
| Rxn #18 | FTL Plate 24    | B10      | 50           | 0.495                             | 0.0731                                               | 0.509                                                  | 3.2                    |
| Rxn #18 | FTL Plate 24    | C10      | 50           | 0.470                             | 0.0731                                               | 0.509                                                  | 8.9                    |
| Rxn #18 | FTL Plate 24    | D10      | 50           | 0.484                             | 0.0731                                               | 0.509                                                  | 5.7                    |
| Rxn #18 | FTL Plate 24    | E10      | 50           | 0.460                             | 0.0731                                               | 0.509                                                  | 11.2                   |
| Rxn #18 | FTL Plate 24    | F10      | 50           | 0.467                             | 0.0731                                               | 0.509                                                  | 9.6                    |
| Rxn #18 | FTL Plate 24    | G10      | 50           | 0.473                             | 0.0731                                               | 0.509                                                  | 8.3                    |
| Rxn #18 | FTL Plate 24    | H10: FOC | -            | 0.519                             | 0.0731                                               | 0.509                                                  | -2.3                   |
| Rxn #18 | FTL Plate 24    | A11: NFC | -            | 0.084                             | 0.0731                                               | 0.509                                                  | 97.5                   |
| Rxn #18 | FTL Plate 24    | B11      | 50           | 0.487                             | 0.0731                                               | 0.509                                                  | 5.0                    |
| Rxn #18 | FTL Plate 24    | C11      | 50           | 0.476                             | 0.0731                                               | 0.509                                                  | 7.6                    |
| Rxn #18 | FTL Plate 24    | D11      | 50           | 0.518                             | 0.0731                                               | 0.509                                                  | -2.1                   |
| Rxn #18 | FTL Plate 24    | E11      | 50           | 0.499                             | 0.0731                                               | 0.509                                                  | 2.3                    |
| Rxn #18 | FTL Plate 24    | F11      | 50           | 0.505                             | 0.0731                                               | 0.509                                                  | 0.9                    |
| Rxn #18 | FTL Plate 24    | G11      | 50           | 0.456                             | 0.0731                                               | 0.509                                                  | 12.2                   |
| Rxn #18 | FTL Plate 24    | H11: FOC | -            | 0.509                             | 0.0731                                               | 0.509                                                  | 0.0                    |
| Rxn #18 | FTL Plate 24    | A12: NFC | -            | 0.089                             | 0.0731                                               | 0.509                                                  | 96.4                   |
| Rxn #18 | FTL Plate 24    | H12: FOC | -            | 0.506                             | 0.0731                                               | 0.509                                                  | 0.7                    |
| Rxn #19 | FTL Plate 9     | A1: NFC  | -            | 0.079                             | 0.0699                                               | 0.549                                                  | 98.1                   |
| Rxn #19 | FTL Plate 9     | B1       | 50           | 0.528                             | 0.0699                                               | 0.549                                                  | 4.4                    |
| Rxn #19 | FTL Plate 9     | C1       | 50           | 0.532                             | 0.0699                                               | 0.549                                                  | 3.5                    |
| Rxn #19 | FTL Plate 9     | D1       | 50           | 0.492                             | 0.0699                                               | 0.549                                                  | 11.9                   |
| Rxn #19 | FTL Plate 9     | E1       | 50           | 0.444                             | 0.0699                                               | 0.549                                                  | 21.9                   |
| Rxn #19 | FTL Plate 9     | F1       | 50           | 0.502                             | 0.0699                                               | 0.549                                                  | 9.8                    |
| Rxn #19 | FTL Plate 9     | G1       | 50           | 0.522                             | 0.0699                                               | 0.549                                                  | 5.6                    |
| Rxn #19 | FTL Plate 9     | H1: FOC  | -            | 0.536                             | 0.0699                                               | 0.549                                                  | 2.7                    |
| Rxn #19 | FTL Plate 9     | A2: NFC  | -            | 0.071                             | 0.0699                                               | 0.549                                                  | 99.8                   |
| Rxn #19 | FTL Plate 9     | B2       | 50           | 0.534                             | 0.0699                                               | 0.549                                                  | 3.1                    |
| Rxn #19 | FTL Plate 9     | C2       | 50           | 0.516                             | 0.0699                                               | 0.549                                                  | 6.9                    |
| Rxn #19 | FTL Plate 9     | D2       | 50           | 0.572                             | 0.0699                                               | 0.549                                                  | -4.8                   |
| Rxn #19 | FTL Plate 9     | E2       | 50           | 0.545                             | 0.0699                                               | 0.549                                                  | 0.8                    |
| Rxn #19 | FTL Plate 9     | F2       | 50           | 0.543                             | 0.0699                                               | 0.549                                                  | 1.3                    |
| Rxn #19 | FTL Plate 9     | G2       | 50           | 0.548                             | 0.0699                                               | 0.549                                                  | 0.2                    |
| Rxn #19 | FTL Plate 9     | H2: FOC  | -            | 0.568                             | 0.0699                                               | 0.549                                                  | -4.0                   |
| Rxn #19 | FTL Plate 9     | A3: NFC  | -            | 0.075                             | 0.0699                                               | 0.549                                                  | 98.9                   |
| Rxn #19 | FTL Plate 9     | B3       | 50           | 0.575                             | 0.0699                                               | 0.549                                                  | -5.4                   |
| Rxn #19 | FTL Plate 9     | C3       | 50           | 0.504                             | 0.0699                                               | 0.549                                                  | 9.4                    |
| Rxn #19 | FTL Plate 9     | D3       | 50           | 0.559                             | 0.0699                                               | 0.549                                                  | -2.1                   |
| Rxn #19 | FTL Plate 9     | E3       | 50           | 0.550                             | 0.0699                                               | 0.549                                                  | -0.2                   |
| Rxn #19 | FTL Plate 9     | F3       | 50           | 0.549                             | 0.0699                                               | 0.549                                                  | 0.0                    |
| Rxn #19 | FTL Plate 9     | G3       | 50           | 0.514                             | 0.0699                                               | 0.549                                                  | 7.3                    |
| Rxn #19 | FTL Plate 9     | H3: FOC  | -            | 0.548                             | 0.0699                                               | 0.549                                                  | 0.2                    |
| Rxn #19 | FTL Plate 9     | A4: NFC  | -            | 0.070                             | 0.0699                                               | 0.549                                                  | 100.0                  |
| Rxn #19 | FTL Plate 9     | B4       | 50           | 0.530                             | 0.0699                                               | 0.549                                                  | 4.0                    |
| Rxn #19 | FTL Plate 9     | C4       | 50           | 0.537                             | 0.0699                                               | 0.549                                                  | 2.5                    |
| Rxn #19 | FTL Plate 9     | D4       | 50           | 0.505                             | 0.0699                                               | 0.549                                                  | 9.2                    |
| Rxn #19 | FTL Plate 9     | E4       | 50           | 0.523                             | 0.0699                                               | 0.549                                                  | 5.4                    |
| Rxn #19 | FTL Plate 9     | F4       | 50           | 0.524                             | 0.0699                                               | 0.549                                                  | 5.2                    |

**S1 Table. Data from Screening of Botanical Extract Library for Inhibition of KHKC Activity.**

| Rxn ID  | Sample          |          |              | Sample<br>( OD <sub>340nm</sub> ) | Ave. No Fructose Controls<br>( OD <sub>340nm</sub> ) | Ave. Fructose Only Controls<br>( OD <sub>340nm</sub> ) | KHKC<br>Inhibition (%) |
|---------|-----------------|----------|--------------|-----------------------------------|------------------------------------------------------|--------------------------------------------------------|------------------------|
|         | Botanical Plate | Well     | Conc (µg/mL) |                                   |                                                      |                                                        |                        |
| Rxn #19 | FTL Plate 9     | G4       | 50           | 0.526                             | 0.0699                                               | 0.549                                                  | 4.8                    |
| Rxn #19 | FTL Plate 9     | H4: FOC  | -            | 0.541                             | 0.0699                                               | 0.549                                                  | 1.7                    |
| Rxn #19 | FTL Plate 9     | A5: NFC  | -            | 0.070                             | 0.0699                                               | 0.549                                                  | 100.0                  |
| Rxn #19 | FTL Plate 9     | B5: NFC  | -            | 0.056                             | 0.0699                                               | 0.549                                                  | 102.9                  |
| Rxn #19 | FTL Plate 9     | C5: NFC  | -            | 0.051                             | 0.0699                                               | 0.549                                                  | 103.9                  |
| Rxn #19 | FTL Plate 9     | D5: NFC  | -            | 0.056                             | 0.0699                                               | 0.549                                                  | 102.9                  |
| Rxn #19 | FTL Plate 9     | E5: FOC  | -            | 0.542                             | 0.0699                                               | 0.549                                                  | 1.5                    |
| Rxn #19 | FTL Plate 9     | F5: FOC  | -            | 0.536                             | 0.0699                                               | 0.549                                                  | 2.7                    |
| Rxn #19 | FTL Plate 9     | G5: FOC  | -            | 0.539                             | 0.0699                                               | 0.549                                                  | 2.1                    |
| Rxn #19 | FTL Plate 9     | H5: FOC  | -            | 0.545                             | 0.0699                                               | 0.549                                                  | 0.8                    |
| Rxn #19 | FTL Plate 9     | A6: NFC  | -            | 0.072                             | 0.0699                                               | 0.549                                                  | 99.6                   |
| Rxn #19 | FTL Plate 9     | B6       | 50           | 0.465                             | 0.0699                                               | 0.549                                                  | 17.5                   |
| Rxn #19 | FTL Plate 9     | C6       | 50           | 0.526                             | 0.0699                                               | 0.549                                                  | 4.8                    |
| Rxn #19 | FTL Plate 9     | D6       | 50           | 0.540                             | 0.0699                                               | 0.549                                                  | 1.9                    |
| Rxn #19 | FTL Plate 9     | E6       | 50           | 0.509                             | 0.0699                                               | 0.549                                                  | 8.3                    |
| Rxn #19 | FTL Plate 9     | F6       | 50           | 0.513                             | 0.0699                                               | 0.549                                                  | 7.5                    |
| Rxn #19 | FTL Plate 9     | G6       | 50           | 0.511                             | 0.0699                                               | 0.549                                                  | 7.9                    |
| Rxn #19 | FTL Plate 9     | H6: FOC  | -            | 0.571                             | 0.0699                                               | 0.549                                                  | -4.6                   |
| Rxn #19 | FTL Plate 9     | A7: NFC  | -            | 0.073                             | 0.0699                                               | 0.549                                                  | 99.4                   |
| Rxn #19 | FTL Plate 9     | B7       | 50           | 0.558                             | 0.0699                                               | 0.549                                                  | -1.9                   |
| Rxn #19 | FTL Plate 9     | C7       | 50           | 0.529                             | 0.0699                                               | 0.549                                                  | 4.2                    |
| Rxn #19 | FTL Plate 9     | D7       | 50           | 0.502                             | 0.0699                                               | 0.549                                                  | 9.8                    |
| Rxn #19 | FTL Plate 9     | E7       | 50           | 0.528                             | 0.0699                                               | 0.549                                                  | 4.4                    |
| Rxn #19 | FTL Plate 9     | F7       | 50           | 0.524                             | 0.0699                                               | 0.549                                                  | 5.2                    |
| Rxn #19 | FTL Plate 9     | G7       | 50           | 0.536                             | 0.0699                                               | 0.549                                                  | 2.7                    |
| Rxn #19 | FTL Plate 9     | H7: FOC  | -            | 0.560                             | 0.0699                                               | 0.549                                                  | -2.3                   |
| Rxn #19 | FTL Plate 9     | A8: NFC  | -            | 0.070                             | 0.0699                                               | 0.549                                                  | 100.0                  |
| Rxn #19 | FTL Plate 9     | B8       | 50           | 0.541                             | 0.0699                                               | 0.549                                                  | 1.7                    |
| Rxn #19 | FTL Plate 9     | C8       | 50           | 0.473                             | 0.0699                                               | 0.549                                                  | 15.9                   |
| Rxn #19 | FTL Plate 9     | D8       | 50           | 0.534                             | 0.0699                                               | 0.549                                                  | 3.1                    |
| Rxn #19 | FTL Plate 9     | E8       | 50           | 0.523                             | 0.0699                                               | 0.549                                                  | 5.4                    |
| Rxn #19 | FTL Plate 9     | F8       | 50           | 0.539                             | 0.0699                                               | 0.549                                                  | 2.1                    |
| Rxn #19 | FTL Plate 9     | G8       | 50           | 0.490                             | 0.0699                                               | 0.549                                                  | 12.3                   |
| Rxn #19 | FTL Plate 9     | H8: FOC  | -            | 0.565                             | 0.0699                                               | 0.549                                                  | -3.3                   |
| Rxn #19 | FTL Plate 9     | A9: NFC  | -            | 0.070                             | 0.0699                                               | 0.549                                                  | 100.0                  |
| Rxn #19 | FTL Plate 9     | B9       | 50           | 0.540                             | 0.0699                                               | 0.549                                                  | 1.9                    |
| Rxn #19 | FTL Plate 9     | C9       | 50           | 0.558                             | 0.0699                                               | 0.549                                                  | -1.9                   |
| Rxn #19 | FTL Plate 9     | D9       | 50           | 0.554                             | 0.0699                                               | 0.549                                                  | -1.0                   |
| Rxn #19 | FTL Plate 9     | E9       | 50           | 0.485                             | 0.0699                                               | 0.549                                                  | 13.4                   |
| Rxn #19 | FTL Plate 9     | F9       | 50           | 0.562                             | 0.0699                                               | 0.549                                                  | -2.7                   |
| Rxn #19 | FTL Plate 9     | G9       | 50           | 0.551                             | 0.0699                                               | 0.549                                                  | -0.4                   |
| Rxn #19 | FTL Plate 9     | H9: FOC  | -            | 0.549                             | 0.0699                                               | 0.549                                                  | 0.0                    |
| Rxn #19 | FTL Plate 9     | A10: NFC | -            | 0.083                             | 0.0699                                               | 0.549                                                  | 97.3                   |
| Rxn #19 | FTL Plate 9     | B10      | 50           | 0.554                             | 0.0699                                               | 0.549                                                  | -1.0                   |
| Rxn #19 | FTL Plate 9     | C10      | 50           | 0.530                             | 0.0699                                               | 0.549                                                  | 4.0                    |
| Rxn #19 | FTL Plate 9     | D10      | 50           | 0.542                             | 0.0699                                               | 0.549                                                  | 1.5                    |
| Rxn #19 | FTL Plate 9     | E10      | 50           | 0.145                             | 0.0699                                               | 0.549                                                  | 84.3                   |
| Rxn #19 | FTL Plate 9     | F10      | 50           | 0.470                             | 0.0699                                               | 0.549                                                  | 16.5                   |
| Rxn #19 | FTL Plate 9     | G10      | 50           | 0.562                             | 0.0699                                               | 0.549                                                  | -2.7                   |
| Rxn #19 | FTL Plate 9     | H10: FOC | -            | 0.556                             | 0.0699                                               | 0.549                                                  | -1.5                   |
| Rxn #19 | FTL Plate 9     | A11: NFC | -            | 0.072                             | 0.0699                                               | 0.549                                                  | 99.6                   |
| Rxn #19 | FTL Plate 9     | B11      | 50           | 0.526                             | 0.0699                                               | 0.549                                                  | 4.8                    |
| Rxn #19 | FTL Plate 9     | C11      | 50           | 0.518                             | 0.0699                                               | 0.549                                                  | 6.5                    |
| Rxn #19 | FTL Plate 9     | D11      | 50           | 0.550                             | 0.0699                                               | 0.549                                                  | -0.2                   |
| Rxn #19 | FTL Plate 9     | E11      | 50           | 0.514                             | 0.0699                                               | 0.549                                                  | 7.3                    |
| Rxn #19 | FTL Plate 9     | F11      | 50           | 0.509                             | 0.0699                                               | 0.549                                                  | 8.3                    |
| Rxn #19 | FTL Plate 9     | G11      | 50           | 0.128                             | 0.0699                                               | 0.549                                                  | 87.9                   |
| Rxn #19 | FTL Plate 9     | H11: FOC | -            | 0.559                             | 0.0699                                               | 0.549                                                  | -2.1                   |
| Rxn #19 | FTL Plate 9     | A12: NFC | -            | 0.080                             | 0.0699                                               | 0.549                                                  | 97.9                   |
| Rxn #19 | FTL Plate 9     | H12: FOC | -            | 0.514                             | 0.0699                                               | 0.549                                                  | 7.3                    |
| Rxn #20 | FTL Plate 11    | A1: NFC  | -            | 0.070                             | 0.0689                                               | 0.580                                                  | 99.8                   |
| Rxn #20 | FTL Plate 11    | B1       | 50           | 0.543                             | 0.0689                                               | 0.580                                                  | 7.2                    |
| Rxn #20 | FTL Plate 11    | C1       | 50           | 0.503                             | 0.0689                                               | 0.580                                                  | 15.1                   |
| Rxn #20 | FTL Plate 11    | D1       | 50           | 0.529                             | 0.0689                                               | 0.580                                                  | 10.0                   |
| Rxn #20 | FTL Plate 11    | E1       | 50           | 0.537                             | 0.0689                                               | 0.580                                                  | 8.4                    |
| Rxn #20 | FTL Plate 11    | F1       | 50           | 0.557                             | 0.0689                                               | 0.580                                                  | 4.5                    |
| Rxn #20 | FTL Plate 11    | G1       | 50           | 0.471                             | 0.0689                                               | 0.580                                                  | 21.3                   |
| Rxn #20 | FTL Plate 11    | H1: FOC  | -            | 0.601                             | 0.0689                                               | 0.580                                                  | -4.1                   |
| Rxn #20 | FTL Plate 11    | A2: NFC  | -            | 0.079                             | 0.0689                                               | 0.580                                                  | 98.0                   |
| Rxn #20 | FTL Plate 11    | B2       | 50           | 0.508                             | 0.0689                                               | 0.580                                                  | 14.1                   |

**S1 Table. Data from Screening of Botanical Extract Library for Inhibition of KHKC Activity.**

| Rxn ID  | Sample          |          |              | Sample<br>( OD <sub>340nm</sub> ) | Ave. No Fructose Controls<br>( OD <sub>340nm</sub> ) | Ave. Fructose Only Controls<br>( OD <sub>340nm</sub> ) | KHKC<br>Inhibition (%) |
|---------|-----------------|----------|--------------|-----------------------------------|------------------------------------------------------|--------------------------------------------------------|------------------------|
|         | Botanical Plate | Well     | Conc (µg/mL) |                                   |                                                      |                                                        |                        |
| Rxn #20 | FTL Plate 11    | C2       | 50           | 0.505                             | 0.0689                                               | 0.580                                                  | 14.7                   |
| Rxn #20 | FTL Plate 11    | D2       | 50           | 0.542                             | 0.0689                                               | 0.580                                                  | 7.4                    |
| Rxn #20 | FTL Plate 11    | E2       | 50           | 0.577                             | 0.0689                                               | 0.580                                                  | 0.6                    |
| Rxn #20 | FTL Plate 11    | F2       | 50           | 0.472                             | 0.0689                                               | 0.580                                                  | 21.1                   |
| Rxn #20 | FTL Plate 11    | G2       | 50           | 0.550                             | 0.0689                                               | 0.580                                                  | 5.9                    |
| Rxn #20 | FTL Plate 11    | H2: FOC  | -            | 0.590                             | 0.0689                                               | 0.580                                                  | -2.0                   |
| Rxn #20 | FTL Plate 11    | A3: NFC  | -            | 0.074                             | 0.0689                                               | 0.580                                                  | 99.0                   |
| Rxn #20 | FTL Plate 11    | B3       | 50           | 0.556                             | 0.0689                                               | 0.580                                                  | 4.7                    |
| Rxn #20 | FTL Plate 11    | C3       | 50           | 0.571                             | 0.0689                                               | 0.580                                                  | 1.8                    |
| Rxn #20 | FTL Plate 11    | D3       | 50           | 0.491                             | 0.0689                                               | 0.580                                                  | 17.4                   |
| Rxn #20 | FTL Plate 11    | E3       | 50           | 0.505                             | 0.0689                                               | 0.580                                                  | 14.7                   |
| Rxn #20 | FTL Plate 11    | F3       | 50           | 0.559                             | 0.0689                                               | 0.580                                                  | 4.1                    |
| Rxn #20 | FTL Plate 11    | G3       | 50           | 0.568                             | 0.0689                                               | 0.580                                                  | 2.3                    |
| Rxn #20 | FTL Plate 11    | H3: FOC  | -            | 0.573                             | 0.0689                                               | 0.580                                                  | 1.4                    |
| Rxn #20 | FTL Plate 11    | A4: NFC  | -            | 0.067                             | 0.0689                                               | 0.580                                                  | 100.4                  |
| Rxn #20 | FTL Plate 11    | B4       | 50           | 0.558                             | 0.0689                                               | 0.580                                                  | 4.3                    |
| Rxn #20 | FTL Plate 11    | C4       | 50           | 0.565                             | 0.0689                                               | 0.580                                                  | 2.9                    |
| Rxn #20 | FTL Plate 11    | D4       | 50           | 0.541                             | 0.0689                                               | 0.580                                                  | 7.6                    |
| Rxn #20 | FTL Plate 11    | E4       | 50           | 0.582                             | 0.0689                                               | 0.580                                                  | -0.4                   |
| Rxn #20 | FTL Plate 11    | F4       | 50           | 0.503                             | 0.0689                                               | 0.580                                                  | 15.1                   |
| Rxn #20 | FTL Plate 11    | G4       | 50           | 0.583                             | 0.0689                                               | 0.580                                                  | -0.6                   |
| Rxn #20 | FTL Plate 11    | H4: FOC  | -            | 0.581                             | 0.0689                                               | 0.580                                                  | -0.2                   |
| Rxn #20 | FTL Plate 11    | A5: NFC  | -            | 0.071                             | 0.0689                                               | 0.580                                                  | 99.6                   |
| Rxn #20 | FTL Plate 11    | B5: NFC  | -            | 0.054                             | 0.0689                                               | 0.580                                                  | 102.9                  |
| Rxn #20 | FTL Plate 11    | C5: NFC  | -            | 0.062                             | 0.0689                                               | 0.580                                                  | 101.4                  |
| Rxn #20 | FTL Plate 11    | D5: NFC  | -            | 0.056                             | 0.0689                                               | 0.580                                                  | 102.5                  |
| Rxn #20 | FTL Plate 11    | E5: FOC  | -            | 0.557                             | 0.0689                                               | 0.580                                                  | 4.5                    |
| Rxn #20 | FTL Plate 11    | F5: FOC  | -            | 0.573                             | 0.0689                                               | 0.580                                                  | 1.4                    |
| Rxn #20 | FTL Plate 11    | G5: FOC  | -            | 0.580                             | 0.0689                                               | 0.580                                                  | 0.0                    |
| Rxn #20 | FTL Plate 11    | H5: FOC  | -            | 0.580                             | 0.0689                                               | 0.580                                                  | 0.0                    |
| Rxn #20 | FTL Plate 11    | A6: NFC  | -            | 0.075                             | 0.0689                                               | 0.580                                                  | 98.8                   |
| Rxn #20 | FTL Plate 11    | B6       | 50           | 0.468                             | 0.0689                                               | 0.580                                                  | 21.9                   |
| Rxn #20 | FTL Plate 11    | C6       | 50           | 0.540                             | 0.0689                                               | 0.580                                                  | 7.8                    |
| Rxn #20 | FTL Plate 11    | D6       | 50           | 0.562                             | 0.0689                                               | 0.580                                                  | 3.5                    |
| Rxn #20 | FTL Plate 11    | E6       | 50           | 0.564                             | 0.0689                                               | 0.580                                                  | 3.1                    |
| Rxn #20 | FTL Plate 11    | F6       | 50           | 0.542                             | 0.0689                                               | 0.580                                                  | 7.4                    |
| Rxn #20 | FTL Plate 11    | G6       | 50           | 0.551                             | 0.0689                                               | 0.580                                                  | 5.7                    |
| Rxn #20 | FTL Plate 11    | H6: FOC  | -            | 0.582                             | 0.0689                                               | 0.580                                                  | -0.4                   |
| Rxn #20 | FTL Plate 11    | A7: NFC  | -            | 0.071                             | 0.0689                                               | 0.580                                                  | 99.6                   |
| Rxn #20 | FTL Plate 11    | B7       | 50           | 0.538                             | 0.0689                                               | 0.580                                                  | 8.2                    |
| Rxn #20 | FTL Plate 11    | C7       | 50           | 0.560                             | 0.0689                                               | 0.580                                                  | 3.9                    |
| Rxn #20 | FTL Plate 11    | D7       | 50           | 0.510                             | 0.0689                                               | 0.580                                                  | 13.7                   |
| Rxn #20 | FTL Plate 11    | E7       | 50           | 0.526                             | 0.0689                                               | 0.580                                                  | 10.6                   |
| Rxn #20 | FTL Plate 11    | F7       | 50           | 0.545                             | 0.0689                                               | 0.580                                                  | 6.8                    |
| Rxn #20 | FTL Plate 11    | G7       | 50           | 0.561                             | 0.0689                                               | 0.580                                                  | 3.7                    |
| Rxn #20 | FTL Plate 11    | H7: FOC  | -            | 0.567                             | 0.0689                                               | 0.580                                                  | 2.5                    |
| Rxn #20 | FTL Plate 11    | A8: NFC  | -            | 0.062                             | 0.0689                                               | 0.580                                                  | 101.4                  |
| Rxn #20 | FTL Plate 11    | B8       | 50           | 0.563                             | 0.0689                                               | 0.580                                                  | 3.3                    |
| Rxn #20 | FTL Plate 11    | C8       | 50           | 0.494                             | 0.0689                                               | 0.580                                                  | 16.8                   |
| Rxn #20 | FTL Plate 11    | D8       | 50           | 0.564                             | 0.0689                                               | 0.580                                                  | 3.1                    |
| Rxn #20 | FTL Plate 11    | E8       | 50           | 0.531                             | 0.0689                                               | 0.580                                                  | 9.6                    |
| Rxn #20 | FTL Plate 11    | F8       | 50           | 0.565                             | 0.0689                                               | 0.580                                                  | 2.9                    |
| Rxn #20 | FTL Plate 11    | G8       | 50           | 0.546                             | 0.0689                                               | 0.580                                                  | 6.7                    |
| Rxn #20 | FTL Plate 11    | H8: FOC  | -            | 0.585                             | 0.0689                                               | 0.580                                                  | -1.0                   |
| Rxn #20 | FTL Plate 11    | A9: NFC  | -            | 0.067                             | 0.0689                                               | 0.580                                                  | 100.4                  |
| Rxn #20 | FTL Plate 11    | B9       | 50           | 0.548                             | 0.0689                                               | 0.580                                                  | 6.3                    |
| Rxn #20 | FTL Plate 11    | C9       | 50           | 0.562                             | 0.0689                                               | 0.580                                                  | 3.5                    |
| Rxn #20 | FTL Plate 11    | D9       | 50           | 0.572                             | 0.0689                                               | 0.580                                                  | 1.6                    |
| Rxn #20 | FTL Plate 11    | E9       | 50           | 0.572                             | 0.0689                                               | 0.580                                                  | 1.6                    |
| Rxn #20 | FTL Plate 11    | F9       | 50           | 0.558                             | 0.0689                                               | 0.580                                                  | 4.3                    |
| Rxn #20 | FTL Plate 11    | G9       | 50           | 0.565                             | 0.0689                                               | 0.580                                                  | 2.9                    |
| Rxn #20 | FTL Plate 11    | H9: FOC  | -            | 0.575                             | 0.0689                                               | 0.580                                                  | 1.0                    |
| Rxn #20 | FTL Plate 11    | A10: NFC | -            | 0.075                             | 0.0689                                               | 0.580                                                  | 98.8                   |
| Rxn #20 | FTL Plate 11    | B10      | 50           | 0.577                             | 0.0689                                               | 0.580                                                  | 0.6                    |
| Rxn #20 | FTL Plate 11    | C10      | 50           | 0.530                             | 0.0689                                               | 0.580                                                  | 9.8                    |
| Rxn #20 | FTL Plate 11    | D10      | 50           | 0.529                             | 0.0689                                               | 0.580                                                  | 10.0                   |
| Rxn #20 | FTL Plate 11    | E10      | 50           | 0.583                             | 0.0689                                               | 0.580                                                  | -0.6                   |
| Rxn #20 | FTL Plate 11    | F10      | 50           | 0.577                             | 0.0689                                               | 0.580                                                  | 0.6                    |
| Rxn #20 | FTL Plate 11    | G10      | 50           | 0.567                             | 0.0689                                               | 0.580                                                  | 2.5                    |
| Rxn #20 | FTL Plate 11    | H10: FOC | -            | 0.579                             | 0.0689                                               | 0.580                                                  | 0.2                    |

**S1 Table. Data from Screening of Botanical Extract Library for Inhibition of KHKC Activity.**

| Rxn ID  | Sample          |          |              | Sample<br>( OD <sub>340nm</sub> ) | Ave. No Fructose Controls<br>( OD <sub>340nm</sub> ) | Ave. Fructose Only Controls<br>( OD <sub>340nm</sub> ) | KHKC<br>Inhibition (%) |
|---------|-----------------|----------|--------------|-----------------------------------|------------------------------------------------------|--------------------------------------------------------|------------------------|
|         | Botanical Plate | Well     | Conc (µg/mL) |                                   |                                                      |                                                        |                        |
| Rxn #20 | FTL Plate 11    | A11: NFC | -            | 0.076                             | 0.0689                                               | 0.580                                                  | 98.6                   |
| Rxn #20 | FTL Plate 11    | B11      | 50           | 0.563                             | 0.0689                                               | 0.580                                                  | 3.3                    |
| Rxn #20 | FTL Plate 11    | C11      | 50           | 0.544                             | 0.0689                                               | 0.580                                                  | 7.0                    |
| Rxn #20 | FTL Plate 11    | D11      | 50           | 0.565                             | 0.0689                                               | 0.580                                                  | 2.9                    |
| Rxn #20 | FTL Plate 11    | E11      | 50           | 0.543                             | 0.0689                                               | 0.580                                                  | 7.2                    |
| Rxn #20 | FTL Plate 11    | F11      | 50           | 0.524                             | 0.0689                                               | 0.580                                                  | 11.0                   |
| Rxn #20 | FTL Plate 11    | G11      | 50           | 0.583                             | 0.0689                                               | 0.580                                                  | -0.6                   |
| Rxn #20 | FTL Plate 11    | H11: FOC | -            | 0.589                             | 0.0689                                               | 0.580                                                  | -1.8                   |
| Rxn #20 | FTL Plate 11    | A12: NFC | -            | 0.074                             | 0.0689                                               | 0.580                                                  | 99.0                   |
| Rxn #20 | FTL Plate 11    | H12: FOC | -            | 0.582                             | 0.0689                                               | 0.580                                                  | -0.4                   |
| Rxn #21 | FTL Plate 12    | A1: NFC  | -            | 0.053                             | 0.0535                                               | 0.516                                                  | 100.1                  |
| Rxn #21 | FTL Plate 12    | B1       | 50           | 0.504                             | 0.0535                                               | 0.516                                                  | 2.6                    |
| Rxn #21 | FTL Plate 12    | C1       | 50           | 0.431                             | 0.0535                                               | 0.516                                                  | 18.4                   |
| Rxn #21 | FTL Plate 12    | D1       | 50           | 0.494                             | 0.0535                                               | 0.516                                                  | 4.8                    |
| Rxn #21 | FTL Plate 12    | E1       | 50           | 0.522                             | 0.0535                                               | 0.516                                                  | -1.3                   |
| Rxn #21 | FTL Plate 12    | F1       | 50           | 0.504                             | 0.0535                                               | 0.516                                                  | 2.6                    |
| Rxn #21 | FTL Plate 12    | G1       | 50           | 0.471                             | 0.0535                                               | 0.516                                                  | 9.7                    |
| Rxn #21 | FTL Plate 12    | H1: FOC  | -            | 0.491                             | 0.0535                                               | 0.516                                                  | 5.4                    |
| Rxn #21 | FTL Plate 12    | A2: NFC  | -            | 0.053                             | 0.0535                                               | 0.516                                                  | 100.1                  |
| Rxn #21 | FTL Plate 12    | B2       | 50           | 0.447                             | 0.0535                                               | 0.516                                                  | 14.9                   |
| Rxn #21 | FTL Plate 12    | C2       | 50           | 0.523                             | 0.0535                                               | 0.516                                                  | -1.5                   |
| Rxn #21 | FTL Plate 12    | D2       | 50           | 0.497                             | 0.0535                                               | 0.516                                                  | 4.1                    |
| Rxn #21 | FTL Plate 12    | E2       | 50           | 0.518                             | 0.0535                                               | 0.516                                                  | -0.4                   |
| Rxn #21 | FTL Plate 12    | F2       | 50           | 0.460                             | 0.0535                                               | 0.516                                                  | 12.1                   |
| Rxn #21 | FTL Plate 12    | G2       | 50           | 0.509                             | 0.0535                                               | 0.516                                                  | 1.5                    |
| Rxn #21 | FTL Plate 12    | H2: FOC  | -            | 0.509                             | 0.0535                                               | 0.516                                                  | 1.5                    |
| Rxn #21 | FTL Plate 12    | A3: NFC  | -            | 0.059                             | 0.0535                                               | 0.516                                                  | 98.8                   |
| Rxn #21 | FTL Plate 12    | B3       | 50           | 0.509                             | 0.0535                                               | 0.516                                                  | 1.5                    |
| Rxn #21 | FTL Plate 12    | C3       | 50           | 0.530                             | 0.0535                                               | 0.516                                                  | -3.0                   |
| Rxn #21 | FTL Plate 12    | D3       | 50           | 0.478                             | 0.0535                                               | 0.516                                                  | 8.2                    |
| Rxn #21 | FTL Plate 12    | E3       | 50           | 0.498                             | 0.0535                                               | 0.516                                                  | 3.9                    |
| Rxn #21 | FTL Plate 12    | F3       | 50           | 0.512                             | 0.0535                                               | 0.516                                                  | 0.9                    |
| Rxn #21 | FTL Plate 12    | G3       | 50           | 0.539                             | 0.0535                                               | 0.516                                                  | -5.0                   |
| Rxn #21 | FTL Plate 12    | H3: FOC  | -            | 0.521                             | 0.0535                                               | 0.516                                                  | -1.1                   |
| Rxn #21 | FTL Plate 12    | A4: NFC  | -            | 0.053                             | 0.0535                                               | 0.516                                                  | 100.1                  |
| Rxn #21 | FTL Plate 12    | B4       | 50           | 0.505                             | 0.0535                                               | 0.516                                                  | 2.4                    |
| Rxn #21 | FTL Plate 12    | C4       | 50           | 0.512                             | 0.0535                                               | 0.516                                                  | 0.9                    |
| Rxn #21 | FTL Plate 12    | D4       | 50           | 0.503                             | 0.0535                                               | 0.516                                                  | 2.8                    |
| Rxn #21 | FTL Plate 12    | E4       | 50           | 0.430                             | 0.0535                                               | 0.516                                                  | 18.6                   |
| Rxn #21 | FTL Plate 12    | F4       | 50           | 0.498                             | 0.0535                                               | 0.516                                                  | 3.9                    |
| Rxn #21 | FTL Plate 12    | G4       | 50           | 0.490                             | 0.0535                                               | 0.516                                                  | 5.6                    |
| Rxn #21 | FTL Plate 12    | H4: FOC  | -            | 0.527                             | 0.0535                                               | 0.516                                                  | -2.4                   |
| Rxn #21 | FTL Plate 12    | A5: NFC  | -            | 0.054                             | 0.0535                                               | 0.516                                                  | 99.9                   |
| Rxn #21 | FTL Plate 12    | B5: NFC  | -            | 0.042                             | 0.0535                                               | 0.516                                                  | 102.5                  |
| Rxn #21 | FTL Plate 12    | C5: NFC  | -            | 0.045                             | 0.0535                                               | 0.516                                                  | 101.8                  |
| Rxn #21 | FTL Plate 12    | D5: NFC  | -            | 0.036                             | 0.0535                                               | 0.516                                                  | 103.8                  |
| Rxn #21 | FTL Plate 12    | E5: FOC  | -            | 0.517                             | 0.0535                                               | 0.516                                                  | -0.2                   |
| Rxn #21 | FTL Plate 12    | F5: FOC  | -            | 0.496                             | 0.0535                                               | 0.516                                                  | 4.3                    |
| Rxn #21 | FTL Plate 12    | G5: FOC  | -            | 0.525                             | 0.0535                                               | 0.516                                                  | -1.9                   |
| Rxn #21 | FTL Plate 12    | H5: FOC  | -            | 0.510                             | 0.0535                                               | 0.516                                                  | 1.3                    |
| Rxn #21 | FTL Plate 12    | A6: NFC  | -            | 0.054                             | 0.0535                                               | 0.516                                                  | 99.9                   |
| Rxn #21 | FTL Plate 12    | B6       | 50           | 0.505                             | 0.0535                                               | 0.516                                                  | 2.4                    |
| Rxn #21 | FTL Plate 12    | C6       | 50           | 0.473                             | 0.0535                                               | 0.516                                                  | 9.3                    |
| Rxn #21 | FTL Plate 12    | D6       | 50           | 0.496                             | 0.0535                                               | 0.516                                                  | 4.3                    |
| Rxn #21 | FTL Plate 12    | E6       | 50           | 0.509                             | 0.0535                                               | 0.516                                                  | 1.5                    |
| Rxn #21 | FTL Plate 12    | F6       | 50           | 0.460                             | 0.0535                                               | 0.516                                                  | 12.1                   |
| Rxn #21 | FTL Plate 12    | G6       | 50           | 0.445                             | 0.0535                                               | 0.516                                                  | 15.4                   |
| Rxn #21 | FTL Plate 12    | H6: FOC  | -            | 0.504                             | 0.0535                                               | 0.516                                                  | 2.6                    |
| Rxn #21 | FTL Plate 12    | A7: NFC  | -            | 0.054                             | 0.0535                                               | 0.516                                                  | 99.9                   |
| Rxn #21 | FTL Plate 12    | B7       | 50           | 0.502                             | 0.0535                                               | 0.516                                                  | 3.0                    |
| Rxn #21 | FTL Plate 12    | C7       | 50           | 0.483                             | 0.0535                                               | 0.516                                                  | 7.1                    |
| Rxn #21 | FTL Plate 12    | D7       | 50           | 0.507                             | 0.0535                                               | 0.516                                                  | 1.9                    |
| Rxn #21 | FTL Plate 12    | E7       | 50           | 0.470                             | 0.0535                                               | 0.516                                                  | 9.9                    |
| Rxn #21 | FTL Plate 12    | F7       | 50           | 0.542                             | 0.0535                                               | 0.516                                                  | -5.6                   |
| Rxn #21 | FTL Plate 12    | G7       | 50           | 0.517                             | 0.0535                                               | 0.516                                                  | -0.2                   |
| Rxn #21 | FTL Plate 12    | H7: FOC  | -            | 0.542                             | 0.0535                                               | 0.516                                                  | -5.6                   |
| Rxn #21 | FTL Plate 12    | A8: NFC  | -            | 0.057                             | 0.0535                                               | 0.516                                                  | 99.2                   |
| Rxn #21 | FTL Plate 12    | B8       | 50           | 0.508                             | 0.0535                                               | 0.516                                                  | 1.7                    |
| Rxn #21 | FTL Plate 12    | C8       | 50           | 0.498                             | 0.0535                                               | 0.516                                                  | 3.9                    |
| Rxn #21 | FTL Plate 12    | D8       | 50           | 0.507                             | 0.0535                                               | 0.516                                                  | 1.9                    |



**S1 Table. Data from Screening of Botanical Extract Library for Inhibition of KHKC Activity.**

| Rxn ID  | Sample          |          |              | Sample<br>( OD <sub>340nm</sub> ) | Ave. No Fructose Controls<br>( OD <sub>340nm</sub> ) | Ave. Fructose Only Controls<br>( OD <sub>340nm</sub> ) | KHKC<br>Inhibition (%) |
|---------|-----------------|----------|--------------|-----------------------------------|------------------------------------------------------|--------------------------------------------------------|------------------------|
|         | Botanical Plate | Well     | Conc (µg/mL) |                                   |                                                      |                                                        |                        |
| Rxn #21 | FTL Plate 12    | E8       | 50           | 0.409                             | 0.0535                                               | 0.516                                                  | 23.1                   |
| Rxn #21 | FTL Plate 12    | F8       | 50           | 0.502                             | 0.0535                                               | 0.516                                                  | 3.0                    |
| Rxn #21 | FTL Plate 12    | G8       | 50           | 0.463                             | 0.0535                                               | 0.516                                                  | 11.5                   |
| Rxn #21 | FTL Plate 12    | H8: FOC  | -            | 0.527                             | 0.0535                                               | 0.516                                                  | -2.4                   |
| Rxn #21 | FTL Plate 12    | A9: NFC  | -            | 0.068                             | 0.0535                                               | 0.516                                                  | 96.9                   |
| Rxn #21 | FTL Plate 12    | B9       | 50           | 0.481                             | 0.0535                                               | 0.516                                                  | 7.6                    |
| Rxn #21 | FTL Plate 12    | C9       | 50           | 0.505                             | 0.0535                                               | 0.516                                                  | 2.4                    |
| Rxn #21 | FTL Plate 12    | D9       | 50           | 0.483                             | 0.0535                                               | 0.516                                                  | 7.1                    |
| Rxn #21 | FTL Plate 12    | E9       | 50           | 0.470                             | 0.0535                                               | 0.516                                                  | 9.9                    |
| Rxn #21 | FTL Plate 12    | F9       | 50           | 0.509                             | 0.0535                                               | 0.516                                                  | 1.5                    |
| Rxn #21 | FTL Plate 12    | G9       | 50           | 0.481                             | 0.0535                                               | 0.516                                                  | 7.6                    |
| Rxn #21 | FTL Plate 12    | H9: FOC  | -            | 0.520                             | 0.0535                                               | 0.516                                                  | -0.9                   |
| Rxn #21 | FTL Plate 12    | A10: NFC | -            | 0.059                             | 0.0535                                               | 0.516                                                  | 98.8                   |
| Rxn #21 | FTL Plate 12    | B10      | 50           | 0.485                             | 0.0535                                               | 0.516                                                  | 6.7                    |
| Rxn #21 | FTL Plate 12    | C10      | 50           | 0.513                             | 0.0535                                               | 0.516                                                  | 0.6                    |
| Rxn #21 | FTL Plate 12    | D10      | 50           | 0.516                             | 0.0535                                               | 0.516                                                  | 0.0                    |
| Rxn #21 | FTL Plate 12    | E10      | 50           | 0.489                             | 0.0535                                               | 0.516                                                  | 5.8                    |
| Rxn #21 | FTL Plate 12    | F10      | 50           | 0.481                             | 0.0535                                               | 0.516                                                  | 7.6                    |
| Rxn #21 | FTL Plate 12    | G10      | 50           | 0.519                             | 0.0535                                               | 0.516                                                  | -0.6                   |
| Rxn #21 | FTL Plate 12    | H10: FOC | -            | 0.539                             | 0.0535                                               | 0.516                                                  | -5.0                   |
| Rxn #21 | FTL Plate 12    | A11: NFC | -            | 0.059                             | 0.0535                                               | 0.516                                                  | 98.8                   |
| Rxn #21 | FTL Plate 12    | B11      | 50           | 0.494                             | 0.0535                                               | 0.516                                                  | 4.8                    |
| Rxn #21 | FTL Plate 12    | C11      | 50           | 0.515                             | 0.0535                                               | 0.516                                                  | 0.2                    |
| Rxn #21 | FTL Plate 12    | D11      | 50           | 0.481                             | 0.0535                                               | 0.516                                                  | 7.6                    |
| Rxn #21 | FTL Plate 12    | E11      | 50           | 0.524                             | 0.0535                                               | 0.516                                                  | -1.7                   |
| Rxn #21 | FTL Plate 12    | F11      | 50           | 0.489                             | 0.0535                                               | 0.516                                                  | 5.8                    |
| Rxn #21 | FTL Plate 12    | G11      | 50           | 0.490                             | 0.0535                                               | 0.516                                                  | 5.6                    |
| Rxn #21 | FTL Plate 12    | H11: FOC | -            | 0.525                             | 0.0535                                               | 0.516                                                  | -1.9                   |
| Rxn #21 | FTL Plate 12    | A12: NFC | -            | 0.056                             | 0.0535                                               | 0.516                                                  | 99.5                   |
| Rxn #21 | FTL Plate 12    | H12: FOC | -            | 0.494                             | 0.0535                                               | 0.516                                                  | 4.8                    |
| Rxn #22 | FTL Plate 26    | A1: NFC  | -            | 0.063                             | 0.0611                                               | 0.524                                                  | 99.6                   |
| Rxn #22 | FTL Plate 26    | B1       | 50           | 0.467                             | 0.0611                                               | 0.524                                                  | 12.3                   |
| Rxn #22 | FTL Plate 26    | C1       | 50           | 0.472                             | 0.0611                                               | 0.524                                                  | 11.2                   |
| Rxn #22 | FTL Plate 26    | D1       | 50           | 0.518                             | 0.0611                                               | 0.524                                                  | 1.3                    |
| Rxn #22 | FTL Plate 26    | E1       | 50           | 0.488                             | 0.0611                                               | 0.524                                                  | 7.8                    |
| Rxn #22 | FTL Plate 26    | F1       | 50           | 0.502                             | 0.0611                                               | 0.524                                                  | 4.8                    |
| Rxn #22 | FTL Plate 26    | G1       | 50           | 0.464                             | 0.0611                                               | 0.524                                                  | 13.0                   |
| Rxn #22 | FTL Plate 26    | H1: FOC  | -            | 0.521                             | 0.0611                                               | 0.524                                                  | 0.6                    |
| Rxn #22 | FTL Plate 26    | A2: NFC  | -            | 0.062                             | 0.0611                                               | 0.524                                                  | 99.8                   |
| Rxn #22 | FTL Plate 26    | B2       | 50           | 0.513                             | 0.0611                                               | 0.524                                                  | 2.4                    |
| Rxn #22 | FTL Plate 26    | C2       | 50           | 0.531                             | 0.0611                                               | 0.524                                                  | -1.5                   |
| Rxn #22 | FTL Plate 26    | D2       | 50           | 0.497                             | 0.0611                                               | 0.524                                                  | 5.8                    |
| Rxn #22 | FTL Plate 26    | E2       | 50           | 0.484                             | 0.0611                                               | 0.524                                                  | 8.6                    |
| Rxn #22 | FTL Plate 26    | F2       | 50           | 0.484                             | 0.0611                                               | 0.524                                                  | 8.6                    |
| Rxn #22 | FTL Plate 26    | G2       | 50           | 0.417                             | 0.0611                                               | 0.524                                                  | 23.1                   |
| Rxn #22 | FTL Plate 26    | H2: FOC  | -            | 0.521                             | 0.0611                                               | 0.524                                                  | 0.6                    |
| Rxn #22 | FTL Plate 26    | A3: NFC  | -            | 0.061                             | 0.0611                                               | 0.524                                                  | 100.0                  |
| Rxn #22 | FTL Plate 26    | B3       | 50           | 0.519                             | 0.0611                                               | 0.524                                                  | 1.1                    |
| Rxn #22 | FTL Plate 26    | C3       | 50           | 0.526                             | 0.0611                                               | 0.524                                                  | -0.4                   |
| Rxn #22 | FTL Plate 26    | D3       | 50           | 0.518                             | 0.0611                                               | 0.524                                                  | 1.3                    |
| Rxn #22 | FTL Plate 26    | E3       | 50           | 0.488                             | 0.0611                                               | 0.524                                                  | 7.8                    |
| Rxn #22 | FTL Plate 26    | F3       | 50           | 0.493                             | 0.0611                                               | 0.524                                                  | 6.7                    |
| Rxn #22 | FTL Plate 26    | G3       | 50           | 0.503                             | 0.0611                                               | 0.524                                                  | 4.5                    |
| Rxn #22 | FTL Plate 26    | H3: FOC  | -            | 0.520                             | 0.0611                                               | 0.524                                                  | 0.9                    |
| Rxn #22 | FTL Plate 26    | A4: NFC  | -            | 0.061                             | 0.0611                                               | 0.524                                                  | 100.0                  |
| Rxn #22 | FTL Plate 26    | B4       | 50           | 0.238                             | 0.0611                                               | 0.524                                                  | 61.8                   |
| Rxn #22 | FTL Plate 26    | C4       | 50           | 0.455                             | 0.0611                                               | 0.524                                                  | 14.9                   |
| Rxn #22 | FTL Plate 26    | D4       | 50           | 0.165                             | 0.0611                                               | 0.524                                                  | 77.6                   |
| Rxn #22 | FTL Plate 26    | E4       | 50           | 0.482                             | 0.0611                                               | 0.524                                                  | 9.1                    |
| Rxn #22 | FTL Plate 26    | F4       | 50           | 0.286                             | 0.0611                                               | 0.524                                                  | 51.4                   |
| Rxn #22 | FTL Plate 26    | G4       | 50           | 0.444                             | 0.0611                                               | 0.524                                                  | 17.3                   |
| Rxn #22 | FTL Plate 26    | H4: FOC  | -            | 0.540                             | 0.0611                                               | 0.524                                                  | -3.5                   |
| Rxn #22 | FTL Plate 26    | A5: NFC  | -            | 0.059                             | 0.0611                                               | 0.524                                                  | 100.5                  |
| Rxn #22 | FTL Plate 26    | B5: NFC  | -            | 0.061                             | 0.0611                                               | 0.524                                                  | 100.0                  |
| Rxn #22 | FTL Plate 26    | C5: NFC  | -            | 0.047                             | 0.0611                                               | 0.524                                                  | 103.0                  |
| Rxn #22 | FTL Plate 26    | D5: NFC  | -            | 0.053                             | 0.0611                                               | 0.524                                                  | 101.7                  |
| Rxn #22 | FTL Plate 26    | E5: FOC  | -            | 0.515                             | 0.0611                                               | 0.524                                                  | 1.9                    |
| Rxn #22 | FTL Plate 26    | F5: FOC  | -            | 0.497                             | 0.0611                                               | 0.524                                                  | 5.8                    |
| Rxn #22 | FTL Plate 26    | G5: FOC  | -            | 0.514                             | 0.0611                                               | 0.524                                                  | 2.2                    |
| Rxn #22 | FTL Plate 26    | H5: FOC  | -            | 0.513                             | 0.0611                                               | 0.524                                                  | 2.4                    |

**S1 Table. Data from Screening of Botanical Extract Library for Inhibition of KHKC Activity.**

| Rxn ID  | Sample          |          |              | Sample<br>( OD <sub>340nm</sub> ) | Ave. No Fructose Controls<br>( OD <sub>340nm</sub> ) | Ave. Fructose Only Controls<br>( OD <sub>340nm</sub> ) | KHKC<br>Inhibition (%) |
|---------|-----------------|----------|--------------|-----------------------------------|------------------------------------------------------|--------------------------------------------------------|------------------------|
|         | Botanical Plate | Well     | Conc (µg/mL) |                                   |                                                      |                                                        |                        |
| Rxn #22 | FTL Plate 26    | A6: NFC  | -            | 0.062                             | 0.0611                                               | 0.524                                                  | 99.8                   |
| Rxn #22 | FTL Plate 26    | B6       | 50           | 0.539                             | 0.0611                                               | 0.524                                                  | -3.2                   |
| Rxn #22 | FTL Plate 26    | C6       | 50           | 0.495                             | 0.0611                                               | 0.524                                                  | 6.3                    |
| Rxn #22 | FTL Plate 26    | D6       | 50           | 0.472                             | 0.0611                                               | 0.524                                                  | 11.2                   |
| Rxn #22 | FTL Plate 26    | E6       | 50           | 0.487                             | 0.0611                                               | 0.524                                                  | 8.0                    |
| Rxn #22 | FTL Plate 26    | F6       | 50           | 0.519                             | 0.0611                                               | 0.524                                                  | 1.1                    |
| Rxn #22 | FTL Plate 26    | G6       | 50           | 0.532                             | 0.0611                                               | 0.524                                                  | -1.7                   |
| Rxn #22 | FTL Plate 26    | H6: FOC  | -            | 0.531                             | 0.0611                                               | 0.524                                                  | -1.5                   |
| Rxn #22 | FTL Plate 26    | A7: NFC  | -            | 0.068                             | 0.0611                                               | 0.524                                                  | 98.5                   |
| Rxn #22 | FTL Plate 26    | B7       | 50           | 0.510                             | 0.0611                                               | 0.524                                                  | 3.0                    |
| Rxn #22 | FTL Plate 26    | C7       | 50           | 0.477                             | 0.0611                                               | 0.524                                                  | 10.2                   |
| Rxn #22 | FTL Plate 26    | D7       | 50           | 0.520                             | 0.0611                                               | 0.524                                                  | 0.9                    |
| Rxn #22 | FTL Plate 26    | E7       | 50           | 0.523                             | 0.0611                                               | 0.524                                                  | 0.2                    |
| Rxn #22 | FTL Plate 26    | F7       | 50           | 0.518                             | 0.0611                                               | 0.524                                                  | 1.3                    |
| Rxn #22 | FTL Plate 26    | G7       | 50           | 0.474                             | 0.0611                                               | 0.524                                                  | 10.8                   |
| Rxn #22 | FTL Plate 26    | H7: FOC  | -            | 0.543                             | 0.0611                                               | 0.524                                                  | -4.1                   |
| Rxn #22 | FTL Plate 26    | A8: NFC  | -            | 0.063                             | 0.0611                                               | 0.524                                                  | 99.6                   |
| Rxn #22 | FTL Plate 26    | B8       | 50           | 0.446                             | 0.0611                                               | 0.524                                                  | 16.9                   |
| Rxn #22 | FTL Plate 26    | C8       | 50           | 0.533                             | 0.0611                                               | 0.524                                                  | -1.9                   |
| Rxn #22 | FTL Plate 26    | D8       | 50           | 0.503                             | 0.0611                                               | 0.524                                                  | 4.5                    |
| Rxn #22 | FTL Plate 26    | E8       | 50           | 0.518                             | 0.0611                                               | 0.524                                                  | 1.3                    |
| Rxn #22 | FTL Plate 26    | F8       | 50           | 0.451                             | 0.0611                                               | 0.524                                                  | 15.8                   |
| Rxn #22 | FTL Plate 26    | G8       | 50           | 0.548                             | 0.0611                                               | 0.524                                                  | -5.2                   |
| Rxn #22 | FTL Plate 26    | H8: FOC  | -            | 0.538                             | 0.0611                                               | 0.524                                                  | -3.0                   |
| Rxn #22 | FTL Plate 26    | A9: NFC  | -            | 0.062                             | 0.0611                                               | 0.524                                                  | 99.8                   |
| Rxn #22 | FTL Plate 26    | B9       | 50           | 0.422                             | 0.0611                                               | 0.524                                                  | 22.0                   |
| Rxn #22 | FTL Plate 26    | C9       | 50           | 0.496                             | 0.0611                                               | 0.524                                                  | 6.0                    |
| Rxn #22 | FTL Plate 26    | D9       | 50           | 0.496                             | 0.0611                                               | 0.524                                                  | 6.0                    |
| Rxn #22 | FTL Plate 26    | E9       | 50           | 0.476                             | 0.0611                                               | 0.524                                                  | 10.4                   |
| Rxn #22 | FTL Plate 26    | F9       | 50           | 0.522                             | 0.0611                                               | 0.524                                                  | 0.4                    |
| Rxn #22 | FTL Plate 26    | G9       | 50           | 0.526                             | 0.0611                                               | 0.524                                                  | -0.4                   |
| Rxn #22 | FTL Plate 26    | H9: FOC  | -            | 0.526                             | 0.0611                                               | 0.524                                                  | -0.4                   |
| Rxn #22 | FTL Plate 26    | A10: NFC | -            | 0.059                             | 0.0611                                               | 0.524                                                  | 100.5                  |
| Rxn #22 | FTL Plate 26    | B10      | 50           | 0.485                             | 0.0611                                               | 0.524                                                  | 8.4                    |
| Rxn #22 | FTL Plate 26    | C10      | 50           | 0.501                             | 0.0611                                               | 0.524                                                  | 5.0                    |
| Rxn #22 | FTL Plate 26    | D10      | 50           | 0.511                             | 0.0611                                               | 0.524                                                  | 2.8                    |
| Rxn #22 | FTL Plate 26    | E10      | 50           | 0.468                             | 0.0611                                               | 0.524                                                  | 12.1                   |
| Rxn #22 | FTL Plate 26    | F10      | 50           | 0.505                             | 0.0611                                               | 0.524                                                  | 4.1                    |
| Rxn #22 | FTL Plate 26    | G10      | 50           | 0.501                             | 0.0611                                               | 0.524                                                  | 5.0                    |
| Rxn #22 | FTL Plate 26    | H10: FOC | -            | 0.538                             | 0.0611                                               | 0.524                                                  | -3.0                   |
| Rxn #22 | FTL Plate 26    | A11: NFC | -            | 0.067                             | 0.0611                                               | 0.524                                                  | 98.7                   |
| Rxn #22 | FTL Plate 26    | B11      | 50           | 0.523                             | 0.0611                                               | 0.524                                                  | 0.2                    |
| Rxn #22 | FTL Plate 26    | C11      | 50           | 0.416                             | 0.0611                                               | 0.524                                                  | 23.3                   |
| Rxn #22 | FTL Plate 26    | D11      | 50           | 0.495                             | 0.0611                                               | 0.524                                                  | 6.3                    |
| Rxn #22 | FTL Plate 26    | E11      | 50           | 0.505                             | 0.0611                                               | 0.524                                                  | 4.1                    |
| Rxn #22 | FTL Plate 26    | F11      | 50           | 0.497                             | 0.0611                                               | 0.524                                                  | 5.8                    |
| Rxn #22 | FTL Plate 26    | G11      | 50           | 0.504                             | 0.0611                                               | 0.524                                                  | 4.3                    |
| Rxn #22 | FTL Plate 26    | H11: FOC | -            | 0.528                             | 0.0611                                               | 0.524                                                  | -0.9                   |
| Rxn #22 | FTL Plate 26    | A12: NFC | -            | 0.068                             | 0.0611                                               | 0.524                                                  | 98.5                   |
| Rxn #22 | FTL Plate 26    | H12: FOC | -            | 0.513                             | 0.0611                                               | 0.524                                                  | 2.4                    |
| Rxn #29 | FTL Plate 27    | A1: NFC  | -            | 0.027                             | 0.0258                                               | 0.459                                                  | 99.7                   |
| Rxn #29 | FTL Plate 27    | B1       | 50           | 0.399                             | 0.0258                                               | 0.459                                                  | 13.9                   |
| Rxn #29 | FTL Plate 27    | C1       | 50           | 0.408                             | 0.0258                                               | 0.459                                                  | 11.8                   |
| Rxn #29 | FTL Plate 27    | D1       | 50           | 0.458                             | 0.0258                                               | 0.459                                                  | 0.2                    |
| Rxn #29 | FTL Plate 27    | E1       | 50           | 0.435                             | 0.0258                                               | 0.459                                                  | 5.5                    |
| Rxn #29 | FTL Plate 27    | F1       | 50           | 0.458                             | 0.0258                                               | 0.459                                                  | 0.2                    |
| Rxn #29 | FTL Plate 27    | G1       | 50           | 0.448                             | 0.0258                                               | 0.459                                                  | 2.5                    |
| Rxn #29 | FTL Plate 27    | A2: NFC  | -            | 0.026                             | 0.0258                                               | 0.459                                                  | 100.0                  |
| Rxn #29 | FTL Plate 27    | B2       | 50           | 0.413                             | 0.0258                                               | 0.459                                                  | 10.6                   |
| Rxn #29 | FTL Plate 27    | C2       | 50           | 0.480                             | 0.0258                                               | 0.459                                                  | -4.8                   |
| Rxn #29 | FTL Plate 27    | D2       | 50           | 0.474                             | 0.0258                                               | 0.459                                                  | -3.5                   |
| Rxn #29 | FTL Plate 27    | E2       | 50           | 0.469                             | 0.0258                                               | 0.459                                                  | -2.3                   |
| Rxn #29 | FTL Plate 27    | F2       | 50           | 0.482                             | 0.0258                                               | 0.459                                                  | -5.3                   |
| Rxn #29 | FTL Plate 27    | G2       | 50           | 0.474                             | 0.0258                                               | 0.459                                                  | -3.5                   |
| Rxn #29 | FTL Plate 27    | A3: NFC  | -            | 0.028                             | 0.0258                                               | 0.459                                                  | 99.5                   |
| Rxn #29 | FTL Plate 27    | B3       | 50           | 0.454                             | 0.0258                                               | 0.459                                                  | 1.2                    |
| Rxn #29 | FTL Plate 27    | C3       | 50           | 0.444                             | 0.0258                                               | 0.459                                                  | 3.5                    |
| Rxn #29 | FTL Plate 27    | D3       | 50           | 0.425                             | 0.0258                                               | 0.459                                                  | 7.8                    |
| Rxn #29 | FTL Plate 27    | E3       | 50           | 0.478                             | 0.0258                                               | 0.459                                                  | -4.4                   |
| Rxn #29 | FTL Plate 27    | F3       | 50           | 0.449                             | 0.0258                                               | 0.459                                                  | 2.3                    |

**S1 Table. Data from Screening of Botanical Extract Library for Inhibition of KHKC Activity.**

| Rxn ID  | Sample          |          |              | Sample<br>( OD <sub>340nm</sub> ) | Ave. No Fructose Controls<br>( OD <sub>340nm</sub> ) | Ave. Fructose Only Controls<br>( OD <sub>340nm</sub> ) | KHKC<br>Inhibition (%) |
|---------|-----------------|----------|--------------|-----------------------------------|------------------------------------------------------|--------------------------------------------------------|------------------------|
|         | Botanical Plate | Well     | Conc (µg/mL) |                                   |                                                      |                                                        |                        |
| Rxn #29 | FTL Plate 27    | G3       | 50           | 0.459                             | 0.0258                                               | 0.459                                                  | 0.0                    |
| Rxn #29 | FTL Plate 27    | A4: NFC  | -            | 0.024                             | 0.0258                                               | 0.459                                                  | 100.4                  |
| Rxn #29 | FTL Plate 27    | B4       | 50           | 0.451                             | 0.0258                                               | 0.459                                                  | 1.8                    |
| Rxn #29 | FTL Plate 27    | C4       | 50           | 0.511                             | 0.0258                                               | 0.459                                                  | -12.0                  |
| Rxn #29 | FTL Plate 27    | D4       | 50           | 0.453                             | 0.0258                                               | 0.459                                                  | 1.4                    |
| Rxn #29 | FTL Plate 27    | E4       | 50           | 0.475                             | 0.0258                                               | 0.459                                                  | -3.7                   |
| Rxn #29 | FTL Plate 27    | F4       | 50           | 0.465                             | 0.0258                                               | 0.459                                                  | -1.4                   |
| Rxn #29 | FTL Plate 27    | G4       | 50           | 0.486                             | 0.0258                                               | 0.459                                                  | -6.2                   |
| Rxn #29 | FTL Plate 27    | A5: NFC  | -            | 0.027                             | 0.0258                                               | 0.459                                                  | 99.7                   |
| Rxn #29 | FTL Plate 27    | B5: NFC  | -            | 0.019                             | 0.0258                                               | 0.459                                                  | 101.6                  |
| Rxn #29 | FTL Plate 27    | C5: NFC  | -            | 0.019                             | 0.0258                                               | 0.459                                                  | 101.6                  |
| Rxn #29 | FTL Plate 27    | D5: NFC  | -            | 0.024                             | 0.0258                                               | 0.459                                                  | 100.4                  |
| Rxn #29 | FTL Plate 27    | E5: FOC  | -            | 0.469                             | 0.0258                                               | 0.459                                                  | -2.3                   |
| Rxn #29 | FTL Plate 27    | F5: FOC  | -            | 0.460                             | 0.0258                                               | 0.459                                                  | -0.2                   |
| Rxn #29 | FTL Plate 27    | G5: FOC  | -            | 0.454                             | 0.0258                                               | 0.459                                                  | 1.2                    |
| Rxn #29 | FTL Plate 27    | A6: NFC  | -            | 0.032                             | 0.0258                                               | 0.459                                                  | 98.6                   |
| Rxn #29 | FTL Plate 27    | B6       | 50           | 0.438                             | 0.0258                                               | 0.459                                                  | 4.8                    |
| Rxn #29 | FTL Plate 27    | C6       | 50           | 0.466                             | 0.0258                                               | 0.459                                                  | -1.6                   |
| Rxn #29 | FTL Plate 27    | D6       | 50           | 0.426                             | 0.0258                                               | 0.459                                                  | 7.6                    |
| Rxn #29 | FTL Plate 27    | E6       | 50           | 0.458                             | 0.0258                                               | 0.459                                                  | 0.2                    |
| Rxn #29 | FTL Plate 27    | F6       | 50           | 0.466                             | 0.0258                                               | 0.459                                                  | -1.6                   |
| Rxn #29 | FTL Plate 27    | G6       | 50           | 0.486                             | 0.0258                                               | 0.459                                                  | -6.2                   |
| Rxn #29 | FTL Plate 27    | A7: NFC  | -            | 0.031                             | 0.0258                                               | 0.459                                                  | 98.8                   |
| Rxn #29 | FTL Plate 27    | B7       | 50           | 0.474                             | 0.0258                                               | 0.459                                                  | -3.5                   |
| Rxn #29 | FTL Plate 27    | C7       | 50           | 0.432                             | 0.0258                                               | 0.459                                                  | 6.2                    |
| Rxn #29 | FTL Plate 27    | D7       | 50           | 0.462                             | 0.0258                                               | 0.459                                                  | -0.7                   |
| Rxn #29 | FTL Plate 27    | E7       | 50           | 0.495                             | 0.0258                                               | 0.459                                                  | -8.3                   |
| Rxn #29 | FTL Plate 27    | F7       | 50           | 0.479                             | 0.0258                                               | 0.459                                                  | -4.6                   |
| Rxn #29 | FTL Plate 27    | G7       | 50           | 0.438                             | 0.0258                                               | 0.459                                                  | 4.8                    |
| Rxn #29 | FTL Plate 27    | B8       | 50           | 0.433                             | 0.0258                                               | 0.459                                                  | 6.0                    |
| Rxn #29 | FTL Plate 27    | C8       | 50           | 0.450                             | 0.0258                                               | 0.459                                                  | 2.1                    |
| Rxn #29 | FTL Plate 27    | D8       | 50           | 0.513                             | 0.0258                                               | 0.459                                                  | -12.5                  |
| Rxn #29 | FTL Plate 27    | E8       | 50           | 0.470                             | 0.0258                                               | 0.459                                                  | -2.5                   |
| Rxn #29 | FTL Plate 27    | F8       | 50           | 0.453                             | 0.0258                                               | 0.459                                                  | 1.4                    |
| Rxn #29 | FTL Plate 27    | G8       | 50           | 0.486                             | 0.0258                                               | 0.459                                                  | -6.2                   |
| Rxn #29 | FTL Plate 27    | B9       | 50           | 0.454                             | 0.0258                                               | 0.459                                                  | 1.2                    |
| Rxn #29 | FTL Plate 27    | C9       | 50           | 0.436                             | 0.0258                                               | 0.459                                                  | 5.3                    |
| Rxn #29 | FTL Plate 27    | D9       | 50           | 0.461                             | 0.0258                                               | 0.459                                                  | -0.5                   |
| Rxn #29 | FTL Plate 27    | E9       | 50           | 0.364                             | 0.0258                                               | 0.459                                                  | 21.9                   |
| Rxn #29 | FTL Plate 27    | F9       | 50           | 0.393                             | 0.0258                                               | 0.459                                                  | 15.2                   |
| Rxn #29 | FTL Plate 27    | G9       | 50           | 0.392                             | 0.0258                                               | 0.459                                                  | 15.5                   |
| Rxn #29 | FTL Plate 27    | A10: NFC | -            | 0.027                             | 0.0258                                               | 0.459                                                  | 99.7                   |
| Rxn #29 | FTL Plate 27    | B10      | 50           | 0.437                             | 0.0258                                               | 0.459                                                  | 5.1                    |
| Rxn #29 | FTL Plate 27    | C10      | 50           | 0.478                             | 0.0258                                               | 0.459                                                  | -4.4                   |
| Rxn #29 | FTL Plate 27    | D10      | 50           | 0.518                             | 0.0258                                               | 0.459                                                  | -13.6                  |
| Rxn #29 | FTL Plate 27    | E10      | 50           | 0.415                             | 0.0258                                               | 0.459                                                  | 10.2                   |
| Rxn #29 | FTL Plate 27    | F10      | 50           | 0.384                             | 0.0258                                               | 0.459                                                  | 17.3                   |
| Rxn #29 | FTL Plate 27    | G10      | 50           | 0.375                             | 0.0258                                               | 0.459                                                  | 19.4                   |
| Rxn #29 | FTL Plate 27    | H10: FOC | -            | 0.463                             | 0.0258                                               | 0.459                                                  | -0.9                   |
| Rxn #29 | FTL Plate 27    | A11: NFC | -            | 0.020                             | 0.0258                                               | 0.459                                                  | 101.3                  |
| Rxn #29 | FTL Plate 27    | B11      | 50           | 0.406                             | 0.0258                                               | 0.459                                                  | 12.2                   |
| Rxn #29 | FTL Plate 27    | C11      | 50           | 0.460                             | 0.0258                                               | 0.459                                                  | -0.2                   |
| Rxn #29 | FTL Plate 27    | D11      | 50           | 0.469                             | 0.0258                                               | 0.459                                                  | -2.3                   |
| Rxn #29 | FTL Plate 27    | E11      | 50           | 0.423                             | 0.0258                                               | 0.459                                                  | 8.3                    |
| Rxn #29 | FTL Plate 27    | F11      | 50           | 0.371                             | 0.0258                                               | 0.459                                                  | 20.3                   |
| Rxn #29 | FTL Plate 27    | G11      | 50           | 0.437                             | 0.0258                                               | 0.459                                                  | 5.1                    |
| Rxn #29 | FTL Plate 27    | H11: FOC | -            | 0.448                             | 0.0258                                               | 0.459                                                  | 2.5                    |
| Rxn #29 | FTL Plate 27    | A12: NFC | -            | 0.031                             | 0.0258                                               | 0.459                                                  | 98.8                   |

FTL: functional target library; proprietary library of Amway Corp. KHKC: ketohexokinase isoform C. FOC: fructose only control. NFC: no fructose control. OD: optical density.
