# Supplementary material for: Bioactivity-Guided Identification of Botanical Inhibitors of Ketohexokinase
Source: PubMed Central journal article supplement (PMC4913896; doi:10.1371/journal.pone.0157458), 2016-06-20
Supplement: pone.0157458.s002.pdf [file pone.0157458.s002.pdf]

**S2 Table. Data from Titrations of Candidate Botanical Extracts for Inhibition of KHKC Activity.**

| Rxn ID  | Well | Sample          |      | Sample Conc (µg/mL) | Sample (OD <sub>340nm</sub> ) | Ave. No Fructose Controls (OD <sub>340nm</sub> ) | Ave. Fructose Only Controls (OD <sub>340nm</sub> ) | KHKC Inhibition (%) | *KHKC IC <sub>50</sub> (µg/mL) |
|---------|------|-----------------|------|---------------------|-------------------------------|--------------------------------------------------|----------------------------------------------------|---------------------|--------------------------------|
|         |      | Botanical Plate | Well |                     |                               |                                                  |                                                    |                     |                                |
| Rxn #23 | A1   | FTL Plate 15    | B9   | 200                 | 0.066                         | 0.0772                                           | 0.422                                              | 103.2               | 32.15                          |
| Rxn #23 | A2   | FTL Plate 15    | B9   | 150                 | 0.117                         | 0.0772                                           | 0.422                                              | 88.5                |                                |
| Rxn #23 | A3   | FTL Plate 15    | B9   | 100                 | 0.029                         | 0.0772                                           | 0.422                                              | 114.0               |                                |
| Rxn #23 | A4   | FTL Plate 15    | B9   | 50                  | 0.074                         | 0.0772                                           | 0.422                                              | 100.9               |                                |
| Rxn #23 | A5   | FTL Plate 15    | B9   | 25                  | 0.378                         | 0.0772                                           | 0.422                                              | 12.8                |                                |
| Rxn #23 | A6   | FTL Plate 15    | B9   | 10                  | 0.441                         | 0.0772                                           | 0.422                                              | -5.5                |                                |
| Rxn #23 | A7   | FTL Plate 15    | B9   | 5                   | 0.444                         | 0.0772                                           | 0.422                                              | -6.4                |                                |
| Rxn #23 | A8   | FTL Plate 15    | B9   | 1                   | 0.462                         | 0.0772                                           | 0.422                                              | -11.6               |                                |
| Rxn #23 | A9   | FTL Plate 15    | B9   | 0.5                 | 0.462                         | 0.0772                                           | 0.422                                              | -11.6               |                                |
| Rxn #23 | A10  | FTL Plate 15    | B9   | 0.1                 | 0.454                         | 0.0772                                           | 0.422                                              | -9.3                |                                |
| Rxn #23 | G1   | FTL Plate 26    | F4   | 200                 | 0.142                         | 0.0772                                           | 0.422                                              | 81.2                | 39.24                          |
| Rxn #23 | G2   | FTL Plate 26    | F4   | 150                 | 0.156                         | 0.0772                                           | 0.422                                              | 77.1                |                                |
| Rxn #23 | G3   | FTL Plate 26    | F4   | 100                 | 0.182                         | 0.0772                                           | 0.422                                              | 69.6                |                                |
| Rxn #23 | G4   | FTL Plate 26    | F4   | 50                  | 0.222                         | 0.0772                                           | 0.422                                              | 58.0                |                                |
| Rxn #23 | G5   | FTL Plate 26    | F4   | 25                  | 0.323                         | 0.0772                                           | 0.422                                              | 28.7                |                                |
| Rxn #23 | G6   | FTL Plate 26    | F4   | 10                  | 0.404                         | 0.0772                                           | 0.422                                              | 5.2                 |                                |
| Rxn #23 | G7   | FTL Plate 26    | F4   | 5                   | 0.421                         | 0.0772                                           | 0.422                                              | 0.3                 |                                |
| Rxn #23 | G8   | FTL Plate 26    | F4   | 1                   | 0.476                         | 0.0772                                           | 0.422                                              | -15.7               |                                |
| Rxn #23 | G9   | FTL Plate 26    | F4   | 0.5                 | 0.475                         | 0.0772                                           | 0.422                                              | -15.4               |                                |
| Rxn #23 | G10  | FTL Plate 26    | F4   | 0.1                 | 0.471                         | 0.0772                                           | 0.422                                              | -14.2               |                                |
| Rxn #23 | F1   | FTL Plate 26    | D4   | 200                 | 0.114                         | 0.0772                                           | 0.422                                              | 89.3                | 23.22                          |
| Rxn #23 | F2   | FTL Plate 26    | D4   | 150                 | 0.115                         | 0.0772                                           | 0.422                                              | 89.0                |                                |
| Rxn #23 | F3   | FTL Plate 26    | D4   | 100                 | 0.136                         | 0.0772                                           | 0.422                                              | 82.9                |                                |
| Rxn #23 | F4   | FTL Plate 26    | D4   | 50                  | 0.179                         | 0.0772                                           | 0.422                                              | 70.5                |                                |
| Rxn #23 | F5   | FTL Plate 26    | D4   | 25                  | 0.265                         | 0.0772                                           | 0.422                                              | 45.5                |                                |
| Rxn #23 | F6   | FTL Plate 26    | D4   | 10                  | 0.344                         | 0.0772                                           | 0.422                                              | 22.6                |                                |
| Rxn #23 | F7   | FTL Plate 26    | D4   | 5                   | 0.394                         | 0.0772                                           | 0.422                                              | 8.1                 |                                |
| Rxn #23 | F8   | FTL Plate 26    | D4   | 1                   | 0.451                         | 0.0772                                           | 0.422                                              | -8.4                |                                |
| Rxn #23 | F9   | FTL Plate 26    | D4   | 0.5                 | 0.458                         | 0.0772                                           | 0.422                                              | -10.4               |                                |
| Rxn #23 | F10  | FTL Plate 26    | D4   | 0.1                 | 0.474                         | 0.0772                                           | 0.422                                              | -15.1               |                                |
| Rxn #23 | E1   | FTL Plate 26    | B4   | 200                 | 0.133                         | 0.0772                                           | 0.422                                              | 83.8                | 22.56                          |
| Rxn #23 | E2   | FTL Plate 26    | B4   | 150                 | 0.119                         | 0.0772                                           | 0.422                                              | 87.9                |                                |
| Rxn #23 | E3   | FTL Plate 26    | B4   | 100                 | 0.141                         | 0.0772                                           | 0.422                                              | 81.5                |                                |
| Rxn #23 | E4   | FTL Plate 26    | B4   | 50                  | 0.181                         | 0.0772                                           | 0.422                                              | 69.9                |                                |
| Rxn #23 | E5   | FTL Plate 26    | B4   | 25                  | 0.248                         | 0.0772                                           | 0.422                                              | 50.5                |                                |
| Rxn #23 | E6   | FTL Plate 26    | B4   | 10                  | 0.345                         | 0.0772                                           | 0.422                                              | 22.3                |                                |
| Rxn #23 | E7   | FTL Plate 26    | B4   | 5                   | 0.391                         | 0.0772                                           | 0.422                                              | 9.0                 |                                |
| Rxn #23 | E8   | FTL Plate 26    | B4   | 1                   | 0.446                         | 0.0772                                           | 0.422                                              | -7.0                |                                |
| Rxn #23 | E9   | FTL Plate 26    | B4   | 0.5                 | 0.455                         | 0.0772                                           | 0.422                                              | -9.6                |                                |
| Rxn #23 | E10  | FTL Plate 26    | B4   | 0.1                 | 0.448                         | 0.0772                                           | 0.422                                              | -7.5                |                                |
| Rxn #23 | C1   | FTL Plate 3     | D2   | 200                 | 0.115                         | 0.0772                                           | 0.422                                              | 89.0                | 30.41                          |
| Rxn #23 | C2   | FTL Plate 3     | D2   | 150                 | 0.136                         | 0.0772                                           | 0.422                                              | 82.9                |                                |
| Rxn #23 | C3   | FTL Plate 3     | D2   | 100                 | 0.156                         | 0.0772                                           | 0.422                                              | 77.1                |                                |
| Rxn #23 | C4   | FTL Plate 3     | D2   | 50                  | 0.200                         | 0.0772                                           | 0.422                                              | 64.4                |                                |
| Rxn #23 | C5   | FTL Plate 3     | D2   | 25                  | 0.289                         | 0.0772                                           | 0.422                                              | 38.6                |                                |
| Rxn #23 | C6   | FTL Plate 3     | D2   | 10                  | 0.360                         | 0.0772                                           | 0.422                                              | 18.0                |                                |
| Rxn #23 | C7   | FTL Plate 3     | D2   | 5                   | 0.408                         | 0.0772                                           | 0.422                                              | 4.1                 |                                |
| Rxn #23 | C8   | FTL Plate 3     | D2   | 1                   | 0.454                         | 0.0772                                           | 0.422                                              | -9.3                |                                |
| Rxn #23 | C9   | FTL Plate 3     | D2   | 0.5                 | 0.450                         | 0.0772                                           | 0.422                                              | -8.1                |                                |
| Rxn #23 | C10  | FTL Plate 3     | D2   | 0.1                 | 0.461                         | 0.0772                                           | 0.422                                              | -11.3               |                                |
| Rxn #23 | D1   | FTL Plate 3     | C3   | 200                 | 0.140                         | 0.0772                                           | 0.422                                              | 81.8                | 30.31                          |
| Rxn #23 | D2   | FTL Plate 3     | C3   | 150                 | 0.146                         | 0.0772                                           | 0.422                                              | 80.0                |                                |
| Rxn #23 | D3   | FTL Plate 3     | C3   | 100                 | 0.159                         | 0.0772                                           | 0.422                                              | 76.3                |                                |
| Rxn #23 | D4   | FTL Plate 3     | C3   | 50                  | 0.200                         | 0.0772                                           | 0.422                                              | 64.4                |                                |
| Rxn #23 | D5   | FTL Plate 3     | C3   | 25                  | 0.291                         | 0.0772                                           | 0.422                                              | 38.0                |                                |
| Rxn #23 | D6   | FTL Plate 3     | C3   | 10                  | 0.373                         | 0.0772                                           | 0.422                                              | 14.2                |                                |
| Rxn #23 | D7   | FTL Plate 3     | C3   | 5                   | 0.403                         | 0.0772                                           | 0.422                                              | 5.5                 |                                |
| Rxn #23 | D8   | FTL Plate 3     | C3   | 1                   | 0.459                         | 0.0772                                           | 0.422                                              | -10.7               |                                |
| Rxn #23 | D9   | FTL Plate 3     | C3   | 0.5                 | 0.466                         | 0.0772                                           | 0.422                                              | -12.8               |                                |
| Rxn #23 | D10  | FTL Plate 3     | C3   | 0.1                 | 0.455                         | 0.0772                                           | 0.422                                              | -9.6                |                                |
| Rxn #23 | B1   | FTL Plate 3     | B1   | 200                 | 0.166                         | 0.0772                                           | 0.422                                              | 74.2                | 57.27                          |
| Rxn #23 | B2   | FTL Plate 3     | B1   | 150                 | 0.178                         | 0.0772                                           | 0.422                                              | 70.8                |                                |
| Rxn #23 | B3   | FTL Plate 3     | B1   | 100                 | 0.208                         | 0.0772                                           | 0.422                                              | 62.1                |                                |
| Rxn #23 | B4   | FTL Plate 3     | B1   | 50                  | 0.265                         | 0.0772                                           | 0.422                                              | 45.5                |                                |
| Rxn #23 | B5   | FTL Plate 3     | B1   | 25                  | 0.345                         | 0.0772                                           | 0.422                                              | 22.3                |                                |
| Rxn #23 | B6   | FTL Plate 3     | B1   | 10                  | 0.414                         | 0.0772                                           | 0.422                                              | 2.3                 |                                |
| Rxn #23 | B7   | FTL Plate 3     | B1   | 5                   | 0.419                         | 0.0772                                           | 0.422                                              | 0.9                 |                                |
| Rxn #23 | B8   | FTL Plate 3     | B1   | 1                   | 0.463                         | 0.0772                                           | 0.422                                              | -11.9               |                                |
| Rxn #23 | B9   | FTL Plate 3     | B1   | 0.5                 | 0.458                         | 0.0772                                           | 0.422                                              | -10.4               |                                |
| Rxn #23 | B10  | FTL Plate 3     | B1   | 0.1                 | 0.458                         | 0.0772                                           | 0.422                                              | -10.4               |                                |
| Rxn #23 | H1   | FTL Plate 8     | C11  | 200                 | 0.159                         | 0.0772                                           | 0.422                                              | 76.3                | 50.85                          |
| Rxn #23 | H2   | FTL Plate 8     | C11  | 150                 | 0.177                         | 0.0772                                           | 0.422                                              | 71.1                |                                |

**S2 Table. Data from Titrations of Candidate Botanical Extracts for Inhibition of KHKC Activity.**

| Rxn     |      | Sample                |      |              | Sample                  | Ave. No Fructose Controls | Ave. Fructose Only Controls | KHKC           | *KHKC IC <sub>50</sub> |
|---------|------|-----------------------|------|--------------|-------------------------|---------------------------|-----------------------------|----------------|------------------------|
| ID      | Well | Botanical Plate       | Well | Conc (µg/mL) | ( OD <sub>340nm</sub> ) | ( OD <sub>340nm</sub> )   | ( OD <sub>340nm</sub> )     | Inhibition (%) | (µg/mL)                |
| Rxn #23 | H3   | FTL Plate 8           | C11  | 100          | 0.209                   | 0.0772                    | 0.422                       | 61.8           |                        |
| Rxn #23 | H4   | FTL Plate 8           | C11  | 50           | 0.258                   | 0.0772                    | 0.422                       | 47.6           |                        |
| Rxn #23 | H5   | FTL Plate 8           | C11  | 25           | 0.316                   | 0.0772                    | 0.422                       | 30.7           |                        |
| Rxn #23 | H6   | FTL Plate 8           | C11  | 10           | 0.428                   | 0.0772                    | 0.422                       | -1.7           |                        |
| Rxn #23 | H7   | FTL Plate 8           | C11  | 5            | 0.454                   | 0.0772                    | 0.422                       | -9.3           |                        |
| Rxn #23 | H8   | FTL Plate 8           | C11  | 1            | 0.478                   | 0.0772                    | 0.422                       | -16.2          |                        |
| Rxn #23 | H9   | FTL Plate 8           | C11  | 0.5          | 0.460                   | 0.0772                    | 0.422                       | -11.0          |                        |
| Rxn #23 | H10  | FTL Plate 8           | C11  | 0.1          | 0.458                   | 0.0772                    | 0.422                       | -10.4          |                        |
| Rxn #23 | D12  | No Fructose Control   |      |              | 0.076                   | 0.0772                    | 0.422                       | 100.3          |                        |
| Rxn #23 | E12  | No Fructose Control   |      |              | 0.073                   | 0.0772                    | 0.422                       | 101.2          |                        |
| Rxn #23 | F12  | No Fructose Control   |      |              | 0.073                   | 0.0772                    | 0.422                       | 101.2          |                        |
| Rxn #23 | G12  | No Fructose Control   |      |              | 0.085                   | 0.0772                    | 0.422                       | 97.7           |                        |
| Rxn #23 | H12  | No Fructose Control   |      |              | 0.079                   | 0.0772                    | 0.422                       | 99.5           |                        |
| Rxn #23 | A11  | Fructose Only Control |      |              | 0.428                   | 0.0772                    | 0.422                       | -1.7           |                        |
| Rxn #23 | H11  | Fructose Only Control |      |              | 0.465                   | 0.0772                    | 0.422                       | -12.5          |                        |
| Rxn #23 | A12  | Fructose Only Control |      |              | 0.407                   | 0.0772                    | 0.422                       | 4.4            |                        |
| Rxn #23 | B12  | Fructose Only Control |      |              | 0.368                   | 0.0772                    | 0.422                       | 15.7           |                        |
| Rxn #23 | C12  | Fructose Only Control |      |              | 0.442                   | 0.0772                    | 0.422                       | -5.8           |                        |
| Rxn #25 | H1   | FTL Plate 23          | F9   | 200          | 0.272                   | 0.0624                    | 0.550                       | 57.0           | 129.50                 |
| Rxn #25 | H2   | FTL Plate 23          | F9   | 150          | 0.312                   | 0.0624                    | 0.550                       | 48.8           |                        |
| Rxn #25 | H3   | FTL Plate 23          | F9   | 100          | 0.321                   | 0.0624                    | 0.550                       | 47.0           |                        |
| Rxn #25 | H4   | FTL Plate 23          | F9   | 50           | 0.412                   | 0.0624                    | 0.550                       | 28.3           |                        |
| Rxn #25 | H5   | FTL Plate 23          | F9   | 25           | 0.443                   | 0.0624                    | 0.550                       | 21.9           |                        |
| Rxn #25 | H6   | FTL Plate 23          | F9   | 10           | 0.497                   | 0.0624                    | 0.550                       | 10.9           |                        |
| Rxn #25 | H7   | FTL Plate 23          | F9   | 5            | 0.539                   | 0.0624                    | 0.550                       | 2.3            |                        |
| Rxn #25 | H8   | FTL Plate 23          | F9   | 1            | 0.538                   | 0.0624                    | 0.550                       | 2.5            |                        |
| Rxn #25 | H9   | FTL Plate 23          | F9   | 0.5          | 0.574                   | 0.0624                    | 0.550                       | -4.9           |                        |
| Rxn #25 | H10  | FTL Plate 23          | F9   | 0.1          | 0.559                   | 0.0624                    | 0.550                       | -1.8           |                        |
| Rxn #25 | G1   | FTL Plate 23          | E10  | 200          | 0.321                   | 0.0624                    | 0.550                       | 47.0           | 209.10                 |
| Rxn #25 | G2   | FTL Plate 23          | E10  | 150          | 0.357                   | 0.0624                    | 0.550                       | 39.6           |                        |
| Rxn #25 | G3   | FTL Plate 23          | E10  | 100          | 0.366                   | 0.0624                    | 0.550                       | 37.7           |                        |
| Rxn #25 | G4   | FTL Plate 23          | E10  | 50           | 0.442                   | 0.0624                    | 0.550                       | 22.1           |                        |
| Rxn #25 | G5   | FTL Plate 23          | E10  | 25           | 0.463                   | 0.0624                    | 0.550                       | 17.8           |                        |
| Rxn #25 | G6   | FTL Plate 23          | E10  | 10           | 0.531                   | 0.0624                    | 0.550                       | 3.9            |                        |
| Rxn #25 | G7   | FTL Plate 23          | E10  | 5            | 0.540                   | 0.0624                    | 0.550                       | 2.1            |                        |
| Rxn #25 | G8   | FTL Plate 23          | E10  | 1            | 0.544                   | 0.0624                    | 0.550                       | 1.2            |                        |
| Rxn #25 | G9   | FTL Plate 23          | E10  | 0.5          | 0.551                   | 0.0624                    | 0.550                       | -0.2           |                        |
| Rxn #25 | G10  | FTL Plate 23          | E10  | 0.1          | 0.540                   | 0.0624                    | 0.550                       | 2.1            |                        |
| Rxn #25 | D1   | FTL Plate 24          | D2   | 200          | 0.221                   | 0.0624                    | 0.550                       | 67.5           | 76.41                  |
| Rxn #25 | D2   | FTL Plate 24          | D2   | 150          | 0.245                   | 0.0624                    | 0.550                       | 62.6           |                        |
| Rxn #25 | D3   | FTL Plate 24          | D2   | 100          | 0.269                   | 0.0624                    | 0.550                       | 57.6           |                        |
| Rxn #25 | D4   | FTL Plate 24          | D2   | 50           | 0.335                   | 0.0624                    | 0.550                       | 44.1           |                        |
| Rxn #25 | D5   | FTL Plate 24          | D2   | 25           | 0.386                   | 0.0624                    | 0.550                       | 33.6           |                        |
| Rxn #25 | D6   | FTL Plate 24          | D2   | 10           | 0.466                   | 0.0624                    | 0.550                       | 17.2           |                        |
| Rxn #25 | D7   | FTL Plate 24          | D2   | 5            | 0.492                   | 0.0624                    | 0.550                       | 11.9           |                        |
| Rxn #25 | D8   | FTL Plate 24          | D2   | 1            | 0.500                   | 0.0624                    | 0.550                       | 10.3           |                        |
| Rxn #25 | D9   | FTL Plate 24          | D2   | 0.5          | 0.533                   | 0.0624                    | 0.550                       | 3.5            |                        |
| Rxn #25 | D10  | FTL Plate 24          | D2   | 0.1          | 0.521                   | 0.0624                    | 0.550                       | 5.9            |                        |
| Rxn #25 | E1   | FTL Plate 24          | C6   | 200          | 0.240                   | 0.0624                    | 0.550                       | 63.6           | 120.90                 |
| Rxn #25 | E2   | FTL Plate 24          | C6   | 150          | 0.301                   | 0.0624                    | 0.550                       | 51.1           |                        |
| Rxn #25 | E3   | FTL Plate 24          | C6   | 100          | 0.323                   | 0.0624                    | 0.550                       | 46.6           |                        |
| Rxn #25 | E4   | FTL Plate 24          | C6   | 50           | 0.374                   | 0.0624                    | 0.550                       | 36.1           |                        |
| Rxn #25 | E5   | FTL Plate 24          | C6   | 25           | 0.423                   | 0.0624                    | 0.550                       | 26.0           |                        |
| Rxn #25 | E6   | FTL Plate 24          | C6   | 10           | 0.493                   | 0.0624                    | 0.550                       | 11.7           |                        |
| Rxn #25 | E7   | FTL Plate 24          | C6   | 5            | 0.496                   | 0.0624                    | 0.550                       | 11.1           |                        |
| Rxn #25 | E8   | FTL Plate 24          | C6   | 1            | 0.513                   | 0.0624                    | 0.550                       | 7.6            |                        |
| Rxn #25 | E9   | FTL Plate 24          | C6   | 0.5          | 0.546                   | 0.0624                    | 0.550                       | 0.8            |                        |
| Rxn #25 | E10  | FTL Plate 24          | C6   | 0.1          | 0.534                   | 0.0624                    | 0.550                       | 3.3            |                        |
| Rxn #25 | A1   | FTL Plate 8           | B9   | 200          | 0.234                   | 0.0624                    | 0.550                       | 64.8           | 106.90                 |
| Rxn #25 | A2   | FTL Plate 8           | B9   | 150          | 0.253                   | 0.0624                    | 0.550                       | 60.9           |                        |
| Rxn #25 | A3   | FTL Plate 8           | B9   | 100          | 0.320                   | 0.0624                    | 0.550                       | 47.2           |                        |
| Rxn #25 | A4   | FTL Plate 8           | B9   | 50           | 0.385                   | 0.0624                    | 0.550                       | 33.8           |                        |
| Rxn #25 | A5   | FTL Plate 8           | B9   | 25           | 0.450                   | 0.0624                    | 0.550                       | 20.5           |                        |
| Rxn #25 | A6   | FTL Plate 8           | B9   | 10           | 0.513                   | 0.0624                    | 0.550                       | 7.6            |                        |
| Rxn #25 | A7   | FTL Plate 8           | B9   | 5            | 0.546                   | 0.0624                    | 0.550                       | 0.8            |                        |
| Rxn #25 | A8   | FTL Plate 8           | B9   | 1            | 0.534                   | 0.0624                    | 0.550                       | 3.3            |                        |
| Rxn #25 | A9   | FTL Plate 8           | B9   | 0.5          | 0.545                   | 0.0624                    | 0.550                       | 1.0            |                        |
| Rxn #25 | A10  | FTL Plate 8           | B9   | 0.1          | 0.541                   | 0.0624                    | 0.550                       | 1.8            |                        |
| Rxn #25 | C1   | FTL Plate 9           | G11  | 200          | 0.170                   | 0.0624                    | 0.550                       | 77.9           | 8.92                   |
| Rxn #25 | C2   | FTL Plate 9           | G11  | 150          | 0.125                   | 0.0624                    | 0.550                       | 87.2           |                        |
| Rxn #25 | C3   | FTL Plate 9           | G11  | 100          | 0.075                   | 0.0624                    | 0.550                       | 97.4           |                        |
| Rxn #25 | C4   | FTL Plate 9           | G11  | 50           | 0.134                   | 0.0624                    | 0.550                       | 85.3           |                        |

**S2 Table. Data from Titrations of Candidate Botanical Extracts for Inhibition of KHKC Activity.**

| Rxn     |      | Sample                |      | Sample       | Ave. No Fructose Controls | Ave. Fructose Only Controls | KHKC           | *KHKC IC <sub>50</sub> |
|---------|------|-----------------------|------|--------------|---------------------------|-----------------------------|----------------|------------------------|
| ID      | Well | Botanical Plate       | Well | Conc (µg/mL) | ( OD <sub>340nm</sub> )   | ( OD <sub>340nm</sub> )     | Inhibition (%) | (µg/mL)                |
| Rxn #25 | C5   | FTL Plate 9           | G11  | 25           | 0.211                     | 0.0624                      | 0.550          | 69.5                   |
| Rxn #25 | C6   | FTL Plate 9           | G11  | 10           | 0.308                     | 0.0624                      | 0.550          | 49.6                   |
| Rxn #25 | C7   | FTL Plate 9           | G11  | 5            | 0.390                     | 0.0624                      | 0.550          | 32.8                   |
| Rxn #25 | C8   | FTL Plate 9           | G11  | 1            | 0.497                     | 0.0624                      | 0.550          | 10.9                   |
| Rxn #25 | C9   | FTL Plate 9           | G11  | 0.5          | 0.526                     | 0.0624                      | 0.550          | 4.9                    |
| Rxn #25 | C10  | FTL Plate 9           | G11  | 0.1          | 0.548                     | 0.0624                      | 0.550          | 0.4                    |
| Rxn #25 | B1   | FTL Plate 9           | E10  | 200          | 0.153                     | 0.0624                      | 0.550          | 81.4                   |
| Rxn #25 | B2   | FTL Plate 9           | E10  | 150          | 0.141                     | 0.0624                      | 0.550          | 83.9                   |
| Rxn #25 | B3   | FTL Plate 9           | E10  | 100          | 0.079                     | 0.0624                      | 0.550          | 96.6                   |
| Rxn #25 | B4   | FTL Plate 9           | E10  | 50           | 0.153                     | 0.0624                      | 0.550          | 81.4                   |
| Rxn #25 | B5   | FTL Plate 9           | E10  | 25           | 0.207                     | 0.0624                      | 0.550          | 70.3                   |
| Rxn #25 | B6   | FTL Plate 9           | E10  | 10           | 0.313                     | 0.0624                      | 0.550          | 48.6                   |
| Rxn #25 | B7   | FTL Plate 9           | E10  | 5            | 0.384                     | 0.0624                      | 0.550          | 34.0                   |
| Rxn #25 | B8   | FTL Plate 9           | E10  | 1            | 0.498                     | 0.0624                      | 0.550          | 10.7                   |
| Rxn #25 | B9   | FTL Plate 9           | E10  | 0.5          | 0.503                     | 0.0624                      | 0.550          | 9.6                    |
| Rxn #25 | B10  | FTL Plate 9           | E10  | 0.1          | 0.548                     | 0.0624                      | 0.550          | 0.4                    |
| Rxn #25 | D12  | No Fructose Control   |      |              | 0.065                     | 0.0624                      | 0.550          | 99.5                   |
| Rxn #25 | E12  | No Fructose Control   |      |              | 0.057                     | 0.0624                      | 0.550          | 101.1                  |
| Rxn #25 | F12  | No Fructose Control   |      |              | 0.062                     | 0.0624                      | 0.550          | 100.1                  |
| Rxn #25 | G12  | No Fructose Control   |      |              | 0.062                     | 0.0624                      | 0.550          | 100.1                  |
| Rxn #25 | H12  | No Fructose Control   |      |              | 0.066                     | 0.0624                      | 0.550          | 99.3                   |
| Rxn #25 | A11  | Fructose Only Control |      |              | 0.542                     | 0.0624                      | 0.550          | 1.6                    |
| Rxn #25 | H11  | Fructose Only Control |      |              | 0.548                     | 0.0624                      | 0.550          | 0.4                    |
| Rxn #25 | A12  | Fructose Only Control |      |              | 0.553                     | 0.0624                      | 0.550          | -0.6                   |
| Rxn #25 | B12  | Fructose Only Control |      |              | 0.556                     | 0.0624                      | 0.550          | -1.2                   |
| Rxn #25 | C12  | Fructose Only Control |      |              | 0.551                     | 0.0624                      | 0.550          | -0.2                   |
| Rxn #27 | A1   | FTL Plate 23          | G10  | 200          | 0.254                     | 0.0660                      | 0.514          | 58.0                   |
| Rxn #27 | A2   | FTL Plate 23          | G10  | 150          | 0.279                     | 0.0660                      | 0.514          | 52.5                   |
| Rxn #27 | A3   | FTL Plate 23          | G10  | 100          | 0.314                     | 0.0660                      | 0.514          | 44.6                   |
| Rxn #27 | A4   | FTL Plate 23          | G10  | 50           | 0.369                     | 0.0660                      | 0.514          | 32.4                   |
| Rxn #27 | A5   | FTL Plate 23          | G10  | 25           | 0.431                     | 0.0660                      | 0.514          | 18.5                   |
| Rxn #27 | A6   | FTL Plate 23          | G10  | 10           | 0.489                     | 0.0660                      | 0.514          | 5.6                    |
| Rxn #27 | A7   | FTL Plate 23          | G10  | 5            | 0.487                     | 0.0660                      | 0.514          | 6.0                    |
| Rxn #27 | A8   | FTL Plate 23          | G10  | 1            | 0.508                     | 0.0660                      | 0.514          | 1.3                    |
| Rxn #27 | A9   | FTL Plate 23          | G10  | 0.5          | 0.529                     | 0.0660                      | 0.514          | -3.3                   |
| Rxn #27 | A10  | FTL Plate 23          | G10  | 0.1          | 0.515                     | 0.0660                      | 0.514          | -0.2                   |
| Rxn #27 | C1   | FTL Plate 23          | F11  | 200          | 0.265                     | 0.0660                      | 0.514          | 55.6                   |
| Rxn #27 | C2   | FTL Plate 23          | F11  | 150          | 0.297                     | 0.0660                      | 0.514          | 48.4                   |
| Rxn #27 | C3   | FTL Plate 23          | F11  | 100          | 0.333                     | 0.0660                      | 0.514          | 40.4                   |
| Rxn #27 | C4   | FTL Plate 23          | F11  | 50           | 0.383                     | 0.0660                      | 0.514          | 29.2                   |
| Rxn #27 | C5   | FTL Plate 23          | F11  | 25           | 0.432                     | 0.0660                      | 0.514          | 18.3                   |
| Rxn #27 | C6   | FTL Plate 23          | F11  | 10           | 0.478                     | 0.0660                      | 0.514          | 8.0                    |
| Rxn #27 | C7   | FTL Plate 23          | F11  | 5            | 0.474                     | 0.0660                      | 0.514          | 8.9                    |
| Rxn #27 | C8   | FTL Plate 23          | F11  | 1            | 0.503                     | 0.0660                      | 0.514          | 2.5                    |
| Rxn #27 | C9   | FTL Plate 23          | F11  | 0.5          | 0.500                     | 0.0660                      | 0.514          | 3.1                    |
| Rxn #27 | C10  | FTL Plate 23          | F11  | 0.1          | 0.489                     | 0.0660                      | 0.514          | 5.6                    |
| Rxn #27 | B1   | FTL Plate 23          | B11  | 200          | 0.272                     | 0.0660                      | 0.514          | 54.0                   |
| Rxn #27 | B2   | FTL Plate 23          | B11  | 150          | 0.299                     | 0.0660                      | 0.514          | 48.0                   |
| Rxn #27 | B3   | FTL Plate 23          | B11  | 100          | 0.339                     | 0.0660                      | 0.514          | 39.1                   |
| Rxn #27 | B4   | FTL Plate 23          | B11  | 50           | 0.408                     | 0.0660                      | 0.514          | 23.7                   |
| Rxn #27 | B5   | FTL Plate 23          | B11  | 25           | 0.444                     | 0.0660                      | 0.514          | 15.6                   |
| Rxn #27 | B6   | FTL Plate 23          | B11  | 10           | 0.481                     | 0.0660                      | 0.514          | 7.4                    |
| Rxn #27 | B7   | FTL Plate 23          | B11  | 5            | 0.498                     | 0.0660                      | 0.514          | 3.6                    |
| Rxn #27 | B8   | FTL Plate 23          | B11  | 1            | 0.507                     | 0.0660                      | 0.514          | 1.6                    |
| Rxn #27 | B9   | FTL Plate 23          | B11  | 0.5          | 0.509                     | 0.0660                      | 0.514          | 1.1                    |
| Rxn #27 | B10  | FTL Plate 23          | B11  | 0.1          | 0.506                     | 0.0660                      | 0.514          | 1.8                    |
| Rxn #27 | F1   | FTL Plate 4           | G9   | 200          | 0.258                     | 0.0660                      | 0.514          | 57.1                   |
| Rxn #27 | F2   | FTL Plate 4           | G9   | 150          | 0.283                     | 0.0660                      | 0.514          | 51.6                   |
| Rxn #27 | F3   | FTL Plate 4           | G9   | 100          | 0.329                     | 0.0660                      | 0.514          | 41.3                   |
| Rxn #27 | F4   | FTL Plate 4           | G9   | 50           | 0.371                     | 0.0660                      | 0.514          | 31.9                   |
| Rxn #27 | F5   | FTL Plate 4           | G9   | 25           | 0.424                     | 0.0660                      | 0.514          | 20.1                   |
| Rxn #27 | F6   | FTL Plate 4           | G9   | 10           | 0.481                     | 0.0660                      | 0.514          | 7.4                    |
| Rxn #27 | F7   | FTL Plate 4           | G9   | 5            | 0.493                     | 0.0660                      | 0.514          | 4.7                    |
| Rxn #27 | F8   | FTL Plate 4           | G9   | 1            | 0.495                     | 0.0660                      | 0.514          | 4.2                    |
| Rxn #27 | F9   | FTL Plate 4           | G9   | 0.5          | 0.510                     | 0.0660                      | 0.514          | 0.9                    |
| Rxn #27 | F10  | FTL Plate 4           | G9   | 0.1          | 0.507                     | 0.0660                      | 0.514          | 1.6                    |
| Rxn #27 | E1   | FTL Plate 7           | C7   | 200          | 0.204                     | 0.0660                      | 0.514          | 69.2                   |
| Rxn #27 | E2   | FTL Plate 7           | C7   | 150          | 0.302                     | 0.0660                      | 0.514          | 47.3                   |
| Rxn #27 | E3   | FTL Plate 7           | C7   | 100          | 0.291                     | 0.0660                      | 0.514          | 49.8                   |
| Rxn #27 | E4   | FTL Plate 7           | C7   | 50           | 0.348                     | 0.0660                      | 0.514          | 37.1                   |
| Rxn #27 | E5   | FTL Plate 7           | C7   | 25           | 0.405                     | 0.0660                      | 0.514          | 24.3                   |
| Rxn #27 | E6   | FTL Plate 7           | C7   | 10           | 0.476                     | 0.0660                      | 0.514          | 8.5                    |

**S2 Table. Data from Titrations of Candidate Botanical Extracts for Inhibition of KHKC Activity.**

| Rxn     |      | Sample                |      |              | Sample                  | Ave. No Fructose Controls | Ave. Fructose Only Controls | KHKC           | *KHKC IC <sub>50</sub> |
|---------|------|-----------------------|------|--------------|-------------------------|---------------------------|-----------------------------|----------------|------------------------|
| ID      | Well | Botanical Plate       | Well | Conc (µg/mL) | ( OD <sub>340nm</sub> ) | ( OD <sub>340nm</sub> )   | ( OD <sub>340nm</sub> )     | Inhibition (%) | (µg/mL)                |
| Rxn #27 | E7   | FTL Plate 7           | C7   | 5            | 0.481                   | 0.0660                    | 0.514                       | 7.4            |                        |
| Rxn #27 | E8   | FTL Plate 7           | C7   | 1            | 0.501                   | 0.0660                    | 0.514                       | 2.9            |                        |
| Rxn #27 | E9   | FTL Plate 7           | C7   | 0.5          | 0.510                   | 0.0660                    | 0.514                       | 0.9            |                        |
| Rxn #27 | E10  | FTL Plate 7           | C7   | 0.1          | 0.507                   | 0.0660                    | 0.514                       | 1.6            |                        |
| Rxn #27 | A12  | No Fructose Control   |      |              | 0.075                   | 0.0660                    | 0.514                       | 98.0           |                        |
| Rxn #27 | B12  | No Fructose Control   |      |              | 0.065                   | 0.0660                    | 0.514                       | 100.2          |                        |
| Rxn #27 | C12  | No Fructose Control   |      |              | 0.066                   | 0.0660                    | 0.514                       | 100.0          |                        |
| Rxn #27 | D12  | No Fructose Control   |      |              | 0.068                   | 0.0660                    | 0.514                       | 99.6           |                        |
| Rxn #27 | E12  | No Fructose Control   |      |              | 0.064                   | 0.0660                    | 0.514                       | 100.4          |                        |
| Rxn #27 | F12  | No Fructose Control   |      |              | 0.059                   | 0.0660                    | 0.514                       | 101.6          |                        |
| Rxn #27 | G12  | No Fructose Control   |      |              | 0.063                   | 0.0660                    | 0.514                       | 100.7          |                        |
| Rxn #27 | H12  | No Fructose Control   |      |              | 0.068                   | 0.0660                    | 0.514                       | 99.6           |                        |
| Rxn #27 | G1   | Fructose Only Control |      |              | 0.499                   | 0.0660                    | 0.514                       | 3.3            |                        |
| Rxn #27 | H1   | Fructose Only Control |      |              | 0.513                   | 0.0660                    | 0.514                       | 0.2            |                        |
| Rxn #27 | G2   | Fructose Only Control |      |              | 0.497                   | 0.0660                    | 0.514                       | 3.8            |                        |
| Rxn #27 | H2   | Fructose Only Control |      |              | 0.514                   | 0.0660                    | 0.514                       | 0.0            |                        |
| Rxn #27 | G3   | Fructose Only Control |      |              | 0.521                   | 0.0660                    | 0.514                       | -1.6           |                        |
| Rxn #27 | H3   | Fructose Only Control |      |              | 0.528                   | 0.0660                    | 0.514                       | -3.1           |                        |
| Rxn #27 | G4   | Fructose Only Control |      |              | 0.516                   | 0.0660                    | 0.514                       | -0.4           |                        |
| Rxn #27 | H4   | Fructose Only Control |      |              | 0.532                   | 0.0660                    | 0.514                       | -4.0           |                        |
| Rxn #27 | G5   | Fructose Only Control |      |              | 0.502                   | 0.0660                    | 0.514                       | 2.7            |                        |
| Rxn #27 | H5   | Fructose Only Control |      |              | 0.513                   | 0.0660                    | 0.514                       | 0.2            |                        |
| Rxn #27 | G6   | Fructose Only Control |      |              | 0.528                   | 0.0660                    | 0.514                       | -3.1           |                        |
| Rxn #27 | H6   | Fructose Only Control |      |              | 0.537                   | 0.0660                    | 0.514                       | -5.1           |                        |
| Rxn #27 | G7   | Fructose Only Control |      |              | 0.498                   | 0.0660                    | 0.514                       | 3.6            |                        |
| Rxn #27 | H7   | Fructose Only Control |      |              | 0.512                   | 0.0660                    | 0.514                       | 0.4            |                        |
| Rxn #27 | G8   | Fructose Only Control |      |              | 0.517                   | 0.0660                    | 0.514                       | -0.7           |                        |
| Rxn #27 | H8   | Fructose Only Control |      |              | 0.509                   | 0.0660                    | 0.514                       | 1.1            |                        |
| Rxn #27 | G9   | Fructose Only Control |      |              | 0.509                   | 0.0660                    | 0.514                       | 1.1            |                        |
| Rxn #27 | H9   | Fructose Only Control |      |              | 0.525                   | 0.0660                    | 0.514                       | -2.5           |                        |
| Rxn #27 | G10  | Fructose Only Control |      |              | 0.503                   | 0.0660                    | 0.514                       | 2.5            |                        |
| Rxn #27 | H10  | Fructose Only Control |      |              | 0.516                   | 0.0660                    | 0.514                       | -0.4           |                        |
| Rxn #27 | A11  | Fructose Only Control |      |              | 0.509                   | 0.0660                    | 0.514                       | 1.1            |                        |
| Rxn #27 | H11  | Fructose Only Control |      |              | 0.516                   | 0.0660                    | 0.514                       | -0.4           |                        |

FTL: functional target library; proprietary library of Amway Corp. IC<sub>50</sub>: half maximal inhibitory concentration. OD: optical density.

\*KHKC IC<sub>50</sub>s were calculated using nonlinear regression (three parameters) in GraphPad Prism 5.03. To generate a best fit, an upper concentration (10,000 µg/mL at 100% inhibition) and a lower concentration (0.001 µg/mL at 0% inhibition) were added.
