# Supplementary material for: Bioactivity-Guided Identification of Botanical Inhibitors of Ketohexokinase
Source: PubMed Central journal article supplement (PMC4913896; doi:10.1371/journal.pone.0157458), 2016-06-20
Supplement: pone.0157458.s003.pdf [file pone.0157458.s003.pdf]

**S3 Table. Data from Screening of Phytochemical Library for Inhibition of KHKC Activity.**

| Rxn ID  | Sample              |          |           | Sample<br>( OD <sub>340nm</sub> ) | Ave. No Fructose Controls<br>( OD <sub>340nm</sub> ) | Ave. Fructose Only Controls<br>( OD <sub>340nm</sub> ) | KHKC<br>Inhibition (%) |
|---------|---------------------|----------|-----------|-----------------------------------|------------------------------------------------------|--------------------------------------------------------|------------------------|
|         | Phytochemical Plate | Well     | Conc (µM) |                                   |                                                      |                                                        |                        |
| Rxn #32 | AnalytiCon Plate #1 | A1: NFC  | -         | 0.069                             | 0.0619                                               | 0.457                                                  | 98.2                   |
| Rxn #32 | AnalytiCon Plate #1 | B1       | 50        | 0.360                             | 0.0619                                               | 0.457                                                  | 24.6                   |
| Rxn #32 | AnalytiCon Plate #1 | C1       | 50        | 0.409                             | 0.0619                                               | 0.457                                                  | 12.1                   |
| Rxn #32 | AnalytiCon Plate #1 | D1       | 50        | 0.387                             | 0.0619                                               | 0.457                                                  | 17.7                   |
| Rxn #32 | AnalytiCon Plate #1 | E1       | 50        | 0.404                             | 0.0619                                               | 0.457                                                  | 13.4                   |
| Rxn #32 | AnalytiCon Plate #1 | F1       | 50        | 0.359                             | 0.0619                                               | 0.457                                                  | 24.8                   |
| Rxn #32 | AnalytiCon Plate #1 | G1       | 50        | 0.409                             | 0.0619                                               | 0.457                                                  | 12.1                   |
| Rxn #32 | AnalytiCon Plate #1 | H1: FOC  | -         | 0.438                             | 0.0619                                               | 0.457                                                  | 4.8                    |
| Rxn #32 | AnalytiCon Plate #1 | A2: NFC  | -         | 0.057                             | 0.0619                                               | 0.457                                                  | 101.2                  |
| Rxn #32 | AnalytiCon Plate #1 | B2       | 50        | 0.397                             | 0.0619                                               | 0.457                                                  | 15.2                   |
| Rxn #32 | AnalytiCon Plate #1 | C2       | 50        | 0.471                             | 0.0619                                               | 0.457                                                  | -3.5                   |
| Rxn #32 | AnalytiCon Plate #1 | D2       | 50        | 0.424                             | 0.0619                                               | 0.457                                                  | 8.4                    |
| Rxn #32 | AnalytiCon Plate #1 | E2       | 50        | 0.333                             | 0.0619                                               | 0.457                                                  | 31.4                   |
| Rxn #32 | AnalytiCon Plate #1 | F2       | 50        | 0.417                             | 0.0619                                               | 0.457                                                  | 10.1                   |
| Rxn #32 | AnalytiCon Plate #1 | G2       | 50        | 0.401                             | 0.0619                                               | 0.457                                                  | 14.2                   |
| Rxn #32 | AnalytiCon Plate #1 | H2: FOC  | -         | 0.450                             | 0.0619                                               | 0.457                                                  | 1.8                    |
| Rxn #32 | AnalytiCon Plate #1 | A3: NFC  | -         | 0.060                             | 0.0619                                               | 0.457                                                  | 100.5                  |
| Rxn #32 | AnalytiCon Plate #1 | B3       | 50        | 0.452                             | 0.0619                                               | 0.457                                                  | 1.3                    |
| Rxn #32 | AnalytiCon Plate #1 | C3       | 50        | 0.447                             | 0.0619                                               | 0.457                                                  | 2.5                    |
| Rxn #32 | AnalytiCon Plate #1 | D3       | 50        | 0.380                             | 0.0619                                               | 0.457                                                  | 19.5                   |
| Rxn #32 | AnalytiCon Plate #1 | E3       | 50        | 0.412                             | 0.0619                                               | 0.457                                                  | 11.4                   |
| Rxn #32 | AnalytiCon Plate #1 | F3       | 50        | 0.437                             | 0.0619                                               | 0.457                                                  | 5.1                    |
| Rxn #32 | AnalytiCon Plate #1 | G3       | 50        | 0.413                             | 0.0619                                               | 0.457                                                  | 11.1                   |
| Rxn #32 | AnalytiCon Plate #1 | H3: FOC  | -         | 0.452                             | 0.0619                                               | 0.457                                                  | 1.3                    |
| Rxn #32 | AnalytiCon Plate #1 | A4: NFC  | -         | 0.057                             | 0.0619                                               | 0.457                                                  | 101.2                  |
| Rxn #32 | AnalytiCon Plate #1 | B4       | 50        | 0.396                             | 0.0619                                               | 0.457                                                  | 15.4                   |
| Rxn #32 | AnalytiCon Plate #1 | C4       | 50        | 0.454                             | 0.0619                                               | 0.457                                                  | 0.8                    |
| Rxn #32 | AnalytiCon Plate #1 | D4       | 50        | 0.408                             | 0.0619                                               | 0.457                                                  | 12.4                   |
| Rxn #32 | AnalytiCon Plate #1 | E4       | 50        | 0.445                             | 0.0619                                               | 0.457                                                  | 3.0                    |
| Rxn #32 | AnalytiCon Plate #1 | F4       | 50        | 0.381                             | 0.0619                                               | 0.457                                                  | 19.2                   |
| Rxn #32 | AnalytiCon Plate #1 | G4       | 50        | 0.437                             | 0.0619                                               | 0.457                                                  | 5.1                    |
| Rxn #32 | AnalytiCon Plate #1 | H4: FOC  | -         | 0.454                             | 0.0619                                               | 0.457                                                  | 0.8                    |
| Rxn #32 | AnalytiCon Plate #1 | A5: NFC  | -         | 0.056                             | 0.0619                                               | 0.457                                                  | 101.5                  |
| Rxn #32 | AnalytiCon Plate #1 | B5: NFC  | -         | 0.066                             | 0.0619                                               | 0.457                                                  | 99.0                   |
| Rxn #32 | AnalytiCon Plate #1 | C5: NFC  | -         | 0.066                             | 0.0619                                               | 0.457                                                  | 99.0                   |
| Rxn #32 | AnalytiCon Plate #1 | D5: NFC  | -         | 0.070                             | 0.0619                                               | 0.457                                                  | 97.9                   |
| Rxn #32 | AnalytiCon Plate #1 | E5: FOC  | -         | 0.464                             | 0.0619                                               | 0.457                                                  | -1.8                   |
| Rxn #32 | AnalytiCon Plate #1 | F5: FOC  | -         | 0.467                             | 0.0619                                               | 0.457                                                  | -2.5                   |
| Rxn #32 | AnalytiCon Plate #1 | G5: FOC  | -         | 0.463                             | 0.0619                                               | 0.457                                                  | -1.5                   |
| Rxn #32 | AnalytiCon Plate #1 | H5: FOC  | -         | 0.466                             | 0.0619                                               | 0.457                                                  | -2.3                   |
| Rxn #32 | AnalytiCon Plate #1 | A6: NFC  | -         | 0.067                             | 0.0619                                               | 0.457                                                  | 98.7                   |
| Rxn #32 | AnalytiCon Plate #1 | B6       | 50        | 0.444                             | 0.0619                                               | 0.457                                                  | 3.3                    |
| Rxn #32 | AnalytiCon Plate #1 | C6       | 50        | 0.405                             | 0.0619                                               | 0.457                                                  | 13.2                   |
| Rxn #32 | AnalytiCon Plate #1 | D6       | 50        | 0.437                             | 0.0619                                               | 0.457                                                  | 5.1                    |
| Rxn #32 | AnalytiCon Plate #1 | E6       | 50        | 0.435                             | 0.0619                                               | 0.457                                                  | 5.6                    |
| Rxn #32 | AnalytiCon Plate #1 | F6       | 50        | 0.440                             | 0.0619                                               | 0.457                                                  | 4.3                    |
| Rxn #32 | AnalytiCon Plate #1 | G6       | 50        | 0.426                             | 0.0619                                               | 0.457                                                  | 7.8                    |
| Rxn #32 | AnalytiCon Plate #1 | H6: FOC  | -         | 0.452                             | 0.0619                                               | 0.457                                                  | 1.3                    |
| Rxn #32 | AnalytiCon Plate #1 | A7: NFC  | -         | 0.063                             | 0.0619                                               | 0.457                                                  | 99.7                   |
| Rxn #32 | AnalytiCon Plate #1 | B7       | 50        | 0.451                             | 0.0619                                               | 0.457                                                  | 1.5                    |
| Rxn #32 | AnalytiCon Plate #1 | C7       | 50        | 0.400                             | 0.0619                                               | 0.457                                                  | 14.4                   |
| Rxn #32 | AnalytiCon Plate #1 | D7       | 50        | 0.461                             | 0.0619                                               | 0.457                                                  | -1.0                   |
| Rxn #32 | AnalytiCon Plate #1 | E7       | 50        | 0.461                             | 0.0619                                               | 0.457                                                  | -1.0                   |
| Rxn #32 | AnalytiCon Plate #1 | F7       | 50        | 0.443                             | 0.0619                                               | 0.457                                                  | 3.5                    |
| Rxn #32 | AnalytiCon Plate #1 | G7       | 50        | 0.179                             | 0.0619                                               | 0.457                                                  | 70.4                   |
| Rxn #32 | AnalytiCon Plate #1 | H7: FOC  | -         | 0.461                             | 0.0619                                               | 0.457                                                  | -1.0                   |
| Rxn #32 | AnalytiCon Plate #1 | A8: NFC  | -         | 0.057                             | 0.0619                                               | 0.457                                                  | 101.2                  |
| Rxn #32 | AnalytiCon Plate #1 | B8       | 50        | 0.414                             | 0.0619                                               | 0.457                                                  | 10.9                   |
| Rxn #32 | AnalytiCon Plate #1 | C8       | 50        | 0.445                             | 0.0619                                               | 0.457                                                  | 3.0                    |
| Rxn #32 | AnalytiCon Plate #1 | D8       | 50        | 0.439                             | 0.0619                                               | 0.457                                                  | 4.6                    |
| Rxn #32 | AnalytiCon Plate #1 | E8       | 50        | 0.454                             | 0.0619                                               | 0.457                                                  | 0.8                    |
| Rxn #32 | AnalytiCon Plate #1 | F8       | 50        | 0.442                             | 0.0619                                               | 0.457                                                  | 3.8                    |
| Rxn #32 | AnalytiCon Plate #1 | G8       | 50        | 0.439                             | 0.0619                                               | 0.457                                                  | 4.6                    |
| Rxn #32 | AnalytiCon Plate #1 | H8: FOC  | -         | 0.440                             | 0.0619                                               | 0.457                                                  | 4.3                    |
| Rxn #32 | AnalytiCon Plate #1 | A9: NFC  | -         | 0.061                             | 0.0619                                               | 0.457                                                  | 100.2                  |
| Rxn #32 | AnalytiCon Plate #1 | B9       | 50        | 0.452                             | 0.0619                                               | 0.457                                                  | 1.3                    |
| Rxn #32 | AnalytiCon Plate #1 | C9       | 50        | 0.461                             | 0.0619                                               | 0.457                                                  | -1.0                   |
| Rxn #32 | AnalytiCon Plate #1 | D9       | 50        | 0.441                             | 0.0619                                               | 0.457                                                  | 4.0                    |
| Rxn #32 | AnalytiCon Plate #1 | E9       | 50        | 0.439                             | 0.0619                                               | 0.457                                                  | 4.6                    |
| Rxn #32 | AnalytiCon Plate #1 | F9       | 50        | 0.452                             | 0.0619                                               | 0.457                                                  | 1.3                    |
| Rxn #32 | AnalytiCon Plate #1 | G9       | 50        | 0.440                             | 0.0619                                               | 0.457                                                  | 4.3                    |
| Rxn #32 | AnalytiCon Plate #1 | H9: FOC  | -         | 0.452                             | 0.0619                                               | 0.457                                                  | 1.3                    |
| Rxn #32 | AnalytiCon Plate #1 | A10: NFC | -         | 0.064                             | 0.0619                                               | 0.457                                                  | 99.5                   |
| Rxn #32 | AnalytiCon Plate #1 | B10      | 50        | 0.443                             | 0.0619                                               | 0.457                                                  | 3.5                    |

**S3 Table. Data from Screening of Phytochemical Library for Inhibition of KHKC Activity.**

| Rxn ID  | Sample              |          |           | Sample<br>( OD <sub>340nm</sub> ) | Ave. No Fructose Controls<br>( OD <sub>340nm</sub> ) | Ave. Fructose Only Controls<br>( OD <sub>340nm</sub> ) | KHKC<br>Inhibition (%) |
|---------|---------------------|----------|-----------|-----------------------------------|------------------------------------------------------|--------------------------------------------------------|------------------------|
|         | Phytochemical Plate | Well     | Conc (µM) |                                   |                                                      |                                                        |                        |
| Rxn #32 | AnalytiCon Plate #1 | C10      | 50        | 0.404                             | 0.0619                                               | 0.457                                                  | 13.4                   |
| Rxn #32 | AnalytiCon Plate #1 | D10      | 50        | 0.207                             | 0.0619                                               | 0.457                                                  | 63.3                   |
| Rxn #32 | AnalytiCon Plate #1 | E10      | 50        | 0.431                             | 0.0619                                               | 0.457                                                  | 6.6                    |
| Rxn #32 | AnalytiCon Plate #1 | F10      | 50        | 0.439                             | 0.0619                                               | 0.457                                                  | 4.6                    |
| Rxn #32 | AnalytiCon Plate #1 | G10      | 50        | 0.428                             | 0.0619                                               | 0.457                                                  | 7.3                    |
| Rxn #32 | AnalytiCon Plate #1 | H10: FOC | -         | 0.457                             | 0.0619                                               | 0.457                                                  | 0.0                    |
| Rxn #32 | AnalytiCon Plate #1 | A11: NFC | -         | 0.054                             | 0.0619                                               | 0.457                                                  | 102.0                  |
| Rxn #32 | AnalytiCon Plate #1 | B11      | 50        | 0.436                             | 0.0619                                               | 0.457                                                  | 5.3                    |
| Rxn #32 | AnalytiCon Plate #1 | C11      | 50        | 0.411                             | 0.0619                                               | 0.457                                                  | 11.6                   |
| Rxn #32 | AnalytiCon Plate #1 | D11      | 50        | 0.471                             | 0.0619                                               | 0.457                                                  | -3.5                   |
| Rxn #32 | AnalytiCon Plate #1 | E11      | 50        | 0.425                             | 0.0619                                               | 0.457                                                  | 8.1                    |
| Rxn #32 | AnalytiCon Plate #1 | F11      | 50        | 0.433                             | 0.0619                                               | 0.457                                                  | 6.1                    |
| Rxn #32 | AnalytiCon Plate #1 | G11      | 50        | 0.445                             | 0.0619                                               | 0.457                                                  | 3.0                    |
| Rxn #32 | AnalytiCon Plate #1 | H11: FOC | -         | 0.437                             | 0.0619                                               | 0.457                                                  | 5.1                    |
| Rxn #32 | AnalytiCon Plate #1 | A12: NFC | -         | 0.062                             | 0.0619                                               | 0.457                                                  | 100.0                  |
| Rxn #32 | AnalytiCon Plate #1 | H12: FOC | -         | 0.441                             | 0.0619                                               | 0.457                                                  | 4.0                    |
| Rxn #33 | AnalytiCon Plate #2 | A1: NFC  | -         | 0.045                             | 0.0516                                               | 0.499                                                  | 101.5                  |
| Rxn #33 | AnalytiCon Plate #2 | B1       | 50        | 0.423                             | 0.0516                                               | 0.499                                                  | 17.0                   |
| Rxn #33 | AnalytiCon Plate #2 | C1       | 50        | 0.446                             | 0.0516                                               | 0.499                                                  | 11.8                   |
| Rxn #33 | AnalytiCon Plate #2 | D1       | 50        | 0.424                             | 0.0516                                               | 0.499                                                  | 16.8                   |
| Rxn #33 | AnalytiCon Plate #2 | E1       | 50        | 0.438                             | 0.0516                                               | 0.499                                                  | 13.6                   |
| Rxn #33 | AnalytiCon Plate #2 | F1       | 50        | 0.379                             | 0.0516                                               | 0.499                                                  | 26.8                   |
| Rxn #33 | AnalytiCon Plate #2 | G1       | 50        | 0.451                             | 0.0516                                               | 0.499                                                  | 10.7                   |
| Rxn #33 | AnalytiCon Plate #2 | H1: FOC  | -         | 0.483                             | 0.0516                                               | 0.499                                                  | 3.6                    |
| Rxn #33 | AnalytiCon Plate #2 | A2: NFC  | -         | 0.051                             | 0.0516                                               | 0.499                                                  | 100.1                  |
| Rxn #33 | AnalytiCon Plate #2 | B2       | 50        | 0.482                             | 0.0516                                               | 0.499                                                  | 3.8                    |
| Rxn #33 | AnalytiCon Plate #2 | C2       | 50        | 0.399                             | 0.0516                                               | 0.499                                                  | 22.4                   |
| Rxn #33 | AnalytiCon Plate #2 | D2       | 50        | 0.476                             | 0.0516                                               | 0.499                                                  | 5.1                    |
| Rxn #33 | AnalytiCon Plate #2 | E2       | 50        | 0.500                             | 0.0516                                               | 0.499                                                  | -0.2                   |
| Rxn #33 | AnalytiCon Plate #2 | F2       | 50        | 0.488                             | 0.0516                                               | 0.499                                                  | 2.5                    |
| Rxn #33 | AnalytiCon Plate #2 | G2       | 50        | 0.490                             | 0.0516                                               | 0.499                                                  | 2.0                    |
| Rxn #33 | AnalytiCon Plate #2 | H2: FOC  | -         | 0.506                             | 0.0516                                               | 0.499                                                  | -1.6                   |
| Rxn #33 | AnalytiCon Plate #2 | A3: NFC  | -         | 0.050                             | 0.0516                                               | 0.499                                                  | 100.4                  |
| Rxn #33 | AnalytiCon Plate #2 | B3       | 50        | 0.449                             | 0.0516                                               | 0.499                                                  | 11.2                   |
| Rxn #33 | AnalytiCon Plate #2 | C3       | 50        | 0.481                             | 0.0516                                               | 0.499                                                  | 4.0                    |
| Rxn #33 | AnalytiCon Plate #2 | D3       | 50        | 0.367                             | 0.0516                                               | 0.499                                                  | 29.5                   |
| Rxn #33 | AnalytiCon Plate #2 | E3       | 50        | 0.397                             | 0.0516                                               | 0.499                                                  | 22.8                   |
| Rxn #33 | AnalytiCon Plate #2 | F3       | 50        | 0.484                             | 0.0516                                               | 0.499                                                  | 3.4                    |
| Rxn #33 | AnalytiCon Plate #2 | G3       | 50        | 0.488                             | 0.0516                                               | 0.499                                                  | 2.5                    |
| Rxn #33 | AnalytiCon Plate #2 | H3: FOC  | -         | 0.514                             | 0.0516                                               | 0.499                                                  | -3.4                   |
| Rxn #33 | AnalytiCon Plate #2 | A4: NFC  | -         | 0.047                             | 0.0516                                               | 0.499                                                  | 101.0                  |
| Rxn #33 | AnalytiCon Plate #2 | B4       | 50        | 0.474                             | 0.0516                                               | 0.499                                                  | 5.6                    |
| Rxn #33 | AnalytiCon Plate #2 | C4       | 50        | 0.453                             | 0.0516                                               | 0.499                                                  | 10.3                   |
| Rxn #33 | AnalytiCon Plate #2 | D4       | 50        | 0.508                             | 0.0516                                               | 0.499                                                  | -2.0                   |
| Rxn #33 | AnalytiCon Plate #2 | E4       | 50        | 0.412                             | 0.0516                                               | 0.499                                                  | 19.4                   |
| Rxn #33 | AnalytiCon Plate #2 | F4       | 50        | 0.493                             | 0.0516                                               | 0.499                                                  | 1.3                    |
| Rxn #33 | AnalytiCon Plate #2 | G4       | 50        | 0.485                             | 0.0516                                               | 0.499                                                  | 3.1                    |
| Rxn #33 | AnalytiCon Plate #2 | H4: FOC  | -         | 0.501                             | 0.0516                                               | 0.499                                                  | -0.4                   |
| Rxn #33 | AnalytiCon Plate #2 | A5: NFC  | -         | 0.053                             | 0.0516                                               | 0.499                                                  | 99.7                   |
| Rxn #33 | AnalytiCon Plate #2 | B5: NFC  | -         | 0.051                             | 0.0516                                               | 0.499                                                  | 100.1                  |
| Rxn #33 | AnalytiCon Plate #2 | C5: NFC  | -         | 0.058                             | 0.0516                                               | 0.499                                                  | 98.6                   |
| Rxn #33 | AnalytiCon Plate #2 | D5: NFC  | -         | 0.047                             | 0.0516                                               | 0.499                                                  | 101.0                  |
| Rxn #33 | AnalytiCon Plate #2 | E5: FOC  | -         | 0.482                             | 0.0516                                               | 0.499                                                  | 3.8                    |
| Rxn #33 | AnalytiCon Plate #2 | F5: FOC  | -         | 0.493                             | 0.0516                                               | 0.499                                                  | 1.3                    |
| Rxn #33 | AnalytiCon Plate #2 | G5: FOC  | -         | 0.496                             | 0.0516                                               | 0.499                                                  | 0.7                    |
| Rxn #33 | AnalytiCon Plate #2 | H5: FOC  | -         | 0.501                             | 0.0516                                               | 0.499                                                  | -0.4                   |
| Rxn #33 | AnalytiCon Plate #2 | A6: NFC  | -         | 0.054                             | 0.0516                                               | 0.499                                                  | 99.5                   |
| Rxn #33 | AnalytiCon Plate #2 | B6       | 50        | 0.477                             | 0.0516                                               | 0.499                                                  | 4.9                    |
| Rxn #33 | AnalytiCon Plate #2 | C6       | 50        | 0.482                             | 0.0516                                               | 0.499                                                  | 3.8                    |
| Rxn #33 | AnalytiCon Plate #2 | D6       | 50        | 0.480                             | 0.0516                                               | 0.499                                                  | 4.2                    |
| Rxn #33 | AnalytiCon Plate #2 | E6       | 50        | 0.482                             | 0.0516                                               | 0.499                                                  | 3.8                    |
| Rxn #33 | AnalytiCon Plate #2 | F6       | 50        | 0.484                             | 0.0516                                               | 0.499                                                  | 3.4                    |
| Rxn #33 | AnalytiCon Plate #2 | G6       | 50        | 0.477                             | 0.0516                                               | 0.499                                                  | 4.9                    |
| Rxn #33 | AnalytiCon Plate #2 | H6: FOC  | -         | 0.506                             | 0.0516                                               | 0.499                                                  | -1.6                   |
| Rxn #33 | AnalytiCon Plate #2 | A7: NFC  | -         | 0.044                             | 0.0516                                               | 0.499                                                  | 101.7                  |
| Rxn #33 | AnalytiCon Plate #2 | B7       | 50        | 0.451                             | 0.0516                                               | 0.499                                                  | 10.7                   |
| Rxn #33 | AnalytiCon Plate #2 | C7       | 50        | 0.458                             | 0.0516                                               | 0.499                                                  | 9.2                    |
| Rxn #33 | AnalytiCon Plate #2 | D7       | 50        | 0.482                             | 0.0516                                               | 0.499                                                  | 3.8                    |
| Rxn #33 | AnalytiCon Plate #2 | E7       | 50        | 0.461                             | 0.0516                                               | 0.499                                                  | 8.5                    |
| Rxn #33 | AnalytiCon Plate #2 | F7       | 50        | 0.489                             | 0.0516                                               | 0.499                                                  | 2.2                    |
| Rxn #33 | AnalytiCon Plate #2 | G7       | 50        | 0.483                             | 0.0516                                               | 0.499                                                  | 3.6                    |
| Rxn #33 | AnalytiCon Plate #2 | H7: FOC  | -         | 0.505                             | 0.0516                                               | 0.499                                                  | -1.3                   |
| Rxn #33 | AnalytiCon Plate #2 | A8: NFC  | -         | 0.058                             | 0.0516                                               | 0.499                                                  | 98.6                   |
| Rxn #33 | AnalytiCon Plate #2 | B8       | 50        | 0.225                             | 0.0516                                               | 0.499                                                  | 61.2                   |

**S3 Table. Data from Screening of Phytochemical Library for Inhibition of KHKC Activity.**

| Rxn ID  | Sample              |          |           | Sample<br>( OD <sub>340nm</sub> ) | Ave. No Fructose Controls<br>( OD <sub>340nm</sub> ) | Ave. Fructose Only Controls<br>( OD <sub>340nm</sub> ) | KHKC<br>Inhibition (%) |
|---------|---------------------|----------|-----------|-----------------------------------|------------------------------------------------------|--------------------------------------------------------|------------------------|
|         | Phytochemical Plate | Well     | Conc (µM) |                                   |                                                      |                                                        |                        |
| Rxn #33 | AnalytiCon Plate #2 | C8       | 50        | 0.223                             | 0.0516                                               | 0.499                                                  | 61.7                   |
| Rxn #33 | AnalytiCon Plate #2 | D8       | 50        | 0.432                             | 0.0516                                               | 0.499                                                  | 15.0                   |
| Rxn #33 | AnalytiCon Plate #2 | E8       | 50        | 0.332                             | 0.0516                                               | 0.499                                                  | 37.3                   |
| Rxn #33 | AnalytiCon Plate #2 | F8       | 50        | 0.281                             | 0.0516                                               | 0.499                                                  | 48.7                   |
| Rxn #33 | AnalytiCon Plate #2 | G8       | 50        | 0.445                             | 0.0516                                               | 0.499                                                  | 12.1                   |
| Rxn #33 | AnalytiCon Plate #2 | H8: FOC  | -         | 0.502                             | 0.0516                                               | 0.499                                                  | -0.7                   |
| Rxn #33 | AnalytiCon Plate #2 | A9: NFC  | -         | 0.054                             | 0.0516                                               | 0.499                                                  | 99.5                   |
| Rxn #33 | AnalytiCon Plate #2 | B9       | 50        | 0.450                             | 0.0516                                               | 0.499                                                  | 11.0                   |
| Rxn #33 | AnalytiCon Plate #2 | C9       | 50        | 0.453                             | 0.0516                                               | 0.499                                                  | 10.3                   |
| Rxn #33 | AnalytiCon Plate #2 | D9       | 50        | 0.426                             | 0.0516                                               | 0.499                                                  | 16.3                   |
| Rxn #33 | AnalytiCon Plate #2 | E9       | 50        | 0.466                             | 0.0516                                               | 0.499                                                  | 7.4                    |
| Rxn #33 | AnalytiCon Plate #2 | F9       | 50        | 0.366                             | 0.0516                                               | 0.499                                                  | 29.7                   |
| Rxn #33 | AnalytiCon Plate #2 | G9       | 50        | 0.471                             | 0.0516                                               | 0.499                                                  | 6.3                    |
| Rxn #33 | AnalytiCon Plate #2 | H9: FOC  | -         | 0.488                             | 0.0516                                               | 0.499                                                  | 2.5                    |
| Rxn #33 | AnalytiCon Plate #2 | A10: NFC | -         | 0.050                             | 0.0516                                               | 0.499                                                  | 100.4                  |
| Rxn #33 | AnalytiCon Plate #2 | B10      | 50        | 0.361                             | 0.0516                                               | 0.499                                                  | 30.8                   |
| Rxn #33 | AnalytiCon Plate #2 | C10      | 50        | 0.439                             | 0.0516                                               | 0.499                                                  | 13.4                   |
| Rxn #33 | AnalytiCon Plate #2 | D10      | 50        | 0.408                             | 0.0516                                               | 0.499                                                  | 20.3                   |
| Rxn #33 | AnalytiCon Plate #2 | E10      | 50        | 0.353                             | 0.0516                                               | 0.499                                                  | 32.6                   |
| Rxn #33 | AnalytiCon Plate #2 | F10      | 50        | 0.505                             | 0.0516                                               | 0.499                                                  | -1.3                   |
| Rxn #33 | AnalytiCon Plate #2 | G10      | 50        | 0.081                             | 0.0516                                               | 0.499                                                  | 93.4                   |
| Rxn #33 | AnalytiCon Plate #2 | H10: FOC | -         | 0.487                             | 0.0516                                               | 0.499                                                  | 2.7                    |
| Rxn #33 | AnalytiCon Plate #2 | A11: NFC | -         | 0.055                             | 0.0516                                               | 0.499                                                  | 99.2                   |
| Rxn #33 | AnalytiCon Plate #2 | B11      | 50        | 0.479                             | 0.0516                                               | 0.499                                                  | 4.5                    |
| Rxn #33 | AnalytiCon Plate #2 | C11      | 50        | 0.466                             | 0.0516                                               | 0.499                                                  | 7.4                    |
| Rxn #33 | AnalytiCon Plate #2 | D11      | 50        | 0.445                             | 0.0516                                               | 0.499                                                  | 12.1                   |
| Rxn #33 | AnalytiCon Plate #2 | E11      | 50        | 0.496                             | 0.0516                                               | 0.499                                                  | 0.7                    |
| Rxn #33 | AnalytiCon Plate #2 | F11      | 50        | 0.473                             | 0.0516                                               | 0.499                                                  | 5.8                    |
| Rxn #33 | AnalytiCon Plate #2 | G11      | 50        | 0.493                             | 0.0516                                               | 0.499                                                  | 1.3                    |
| Rxn #33 | AnalytiCon Plate #2 | H11: FOC | -         | 0.470                             | 0.0516                                               | 0.499                                                  | 6.5                    |
| Rxn #33 | AnalytiCon Plate #2 | A12: NFC | -         | 0.057                             | 0.0516                                               | 0.499                                                  | 98.8                   |
| Rxn #33 | AnalytiCon Plate #2 | H12: FOC | -         | 0.475                             | 0.0516                                               | 0.499                                                  | 5.4                    |
| Rxn #34 | AnalytiCon Plate #3 | A1: NFC  | -         | 0.051                             | 0.0543                                               | 0.551                                                  | 100.7                  |
| Rxn #34 | AnalytiCon Plate #3 | B1       | 50        | 0.525                             | 0.0543                                               | 0.551                                                  | 5.2                    |
| Rxn #34 | AnalytiCon Plate #3 | C1       | 50        | 0.524                             | 0.0543                                               | 0.551                                                  | 5.4                    |
| Rxn #34 | AnalytiCon Plate #3 | D1       | 50        | 0.466                             | 0.0543                                               | 0.551                                                  | 17.1                   |
| Rxn #34 | AnalytiCon Plate #3 | E1       | 50        | 0.342                             | 0.0543                                               | 0.551                                                  | 42.1                   |
| Rxn #34 | AnalytiCon Plate #3 | F1       | 50        | 0.453                             | 0.0543                                               | 0.551                                                  | 19.7                   |
| Rxn #34 | AnalytiCon Plate #3 | G1       | 50        | 0.516                             | 0.0543                                               | 0.551                                                  | 7.0                    |
| Rxn #34 | AnalytiCon Plate #3 | H1: FOC  | -         | 0.520                             | 0.0543                                               | 0.551                                                  | 6.2                    |
| Rxn #34 | AnalytiCon Plate #3 | A2: NFC  | -         | 0.048                             | 0.0543                                               | 0.551                                                  | 101.3                  |
| Rxn #34 | AnalytiCon Plate #3 | B2       | 50        | 0.541                             | 0.0543                                               | 0.551                                                  | 2.0                    |
| Rxn #34 | AnalytiCon Plate #3 | C2       | 50        | 0.537                             | 0.0543                                               | 0.551                                                  | 2.8                    |
| Rxn #34 | AnalytiCon Plate #3 | D2       | 50        | 0.430                             | 0.0543                                               | 0.551                                                  | 24.4                   |
| Rxn #34 | AnalytiCon Plate #3 | E2       | 50        | 0.517                             | 0.0543                                               | 0.551                                                  | 6.8                    |
| Rxn #34 | AnalytiCon Plate #3 | F2       | 50        | 0.521                             | 0.0543                                               | 0.551                                                  | 6.0                    |
| Rxn #34 | AnalytiCon Plate #3 | G2       | 50        | 0.529                             | 0.0543                                               | 0.551                                                  | 4.4                    |
| Rxn #34 | AnalytiCon Plate #3 | H2: FOC  | -         | 0.552                             | 0.0543                                               | 0.551                                                  | -0.2                   |
| Rxn #34 | AnalytiCon Plate #3 | A3: NFC  | -         | 0.054                             | 0.0543                                               | 0.551                                                  | 100.1                  |
| Rxn #34 | AnalytiCon Plate #3 | B3       | 50        | 0.536                             | 0.0543                                               | 0.551                                                  | 3.0                    |
| Rxn #34 | AnalytiCon Plate #3 | C3       | 50        | 0.541                             | 0.0543                                               | 0.551                                                  | 2.0                    |
| Rxn #34 | AnalytiCon Plate #3 | D3       | 50        | 0.513                             | 0.0543                                               | 0.551                                                  | 7.7                    |
| Rxn #34 | AnalytiCon Plate #3 | E3       | 50        | 0.430                             | 0.0543                                               | 0.551                                                  | 24.4                   |
| Rxn #34 | AnalytiCon Plate #3 | F3       | 50        | 0.469                             | 0.0543                                               | 0.551                                                  | 16.5                   |
| Rxn #34 | AnalytiCon Plate #3 | G3       | 50        | 0.431                             | 0.0543                                               | 0.551                                                  | 24.2                   |
| Rxn #34 | AnalytiCon Plate #3 | H3: FOC  | -         | 0.552                             | 0.0543                                               | 0.551                                                  | -0.2                   |
| Rxn #34 | AnalytiCon Plate #3 | A4: NFC  | -         | 0.058                             | 0.0543                                               | 0.551                                                  | 99.3                   |
| Rxn #34 | AnalytiCon Plate #3 | B4       | 50        | 0.524                             | 0.0543                                               | 0.551                                                  | 5.4                    |
| Rxn #34 | AnalytiCon Plate #3 | C4       | 50        | 0.524                             | 0.0543                                               | 0.551                                                  | 5.4                    |
| Rxn #34 | AnalytiCon Plate #3 | D4       | 50        | 0.496                             | 0.0543                                               | 0.551                                                  | 11.1                   |
| Rxn #34 | AnalytiCon Plate #3 | E4       | 50        | 0.504                             | 0.0543                                               | 0.551                                                  | 9.5                    |
| Rxn #34 | AnalytiCon Plate #3 | F4       | 50        | 0.529                             | 0.0543                                               | 0.551                                                  | 4.4                    |
| Rxn #34 | AnalytiCon Plate #3 | G4       | 50        | 0.472                             | 0.0543                                               | 0.551                                                  | 15.9                   |
| Rxn #34 | AnalytiCon Plate #3 | H4: FOC  | -         | 0.557                             | 0.0543                                               | 0.551                                                  | -1.2                   |
| Rxn #34 | AnalytiCon Plate #3 | A5: NFC  | -         | 0.052                             | 0.0543                                               | 0.551                                                  | 100.5                  |
| Rxn #34 | AnalytiCon Plate #3 | B5: NFC  | -         | 0.047                             | 0.0543                                               | 0.551                                                  | 101.5                  |
| Rxn #34 | AnalytiCon Plate #3 | C5: NFC  | -         | 0.049                             | 0.0543                                               | 0.551                                                  | 101.1                  |
| Rxn #34 | AnalytiCon Plate #3 | D5: NFC  | -         | 0.052                             | 0.0543                                               | 0.551                                                  | 100.5                  |
| Rxn #34 | AnalytiCon Plate #3 | E5: FOC  | -         | 0.553                             | 0.0543                                               | 0.551                                                  | -0.4                   |
| Rxn #34 | AnalytiCon Plate #3 | F5: FOC  | -         | 0.536                             | 0.0543                                               | 0.551                                                  | 3.0                    |
| Rxn #34 | AnalytiCon Plate #3 | G5: FOC  | -         | 0.555                             | 0.0543                                               | 0.551                                                  | -0.8                   |
| Rxn #34 | AnalytiCon Plate #3 | H5: FOC  | -         | 0.559                             | 0.0543                                               | 0.551                                                  | -1.6                   |
| Rxn #34 | AnalytiCon Plate #3 | A6: NFC  | -         | 0.058                             | 0.0543                                               | 0.551                                                  | 99.3                   |
| Rxn #34 | AnalytiCon Plate #3 | B6       | 50        | 0.523                             | 0.0543                                               | 0.551                                                  | 5.6                    |

**S3 Table. Data from Screening of Phytochemical Library for Inhibition of KHKC Activity.**

| Rxn ID  | Sample              |          |           | Sample<br>( OD <sub>340nm</sub> ) | Ave. No Fructose Controls<br>( OD <sub>340nm</sub> ) | Ave. Fructose Only Controls<br>( OD <sub>340nm</sub> ) | KHKC<br>Inhibition (%) |
|---------|---------------------|----------|-----------|-----------------------------------|------------------------------------------------------|--------------------------------------------------------|------------------------|
|         | Phytochemical Plate | Well     | Conc (µM) |                                   |                                                      |                                                        |                        |
| Rxn #34 | AnalytiCon Plate #3 | C6       | 50        | 0.472                             | 0.0543                                               | 0.551                                                  | 15.9                   |
| Rxn #34 | AnalytiCon Plate #3 | D6       | 50        | 0.381                             | 0.0543                                               | 0.551                                                  | 34.2                   |
| Rxn #34 | AnalytiCon Plate #3 | E6       | 50        | 0.509                             | 0.0543                                               | 0.551                                                  | 8.5                    |
| Rxn #34 | AnalytiCon Plate #3 | F6       | 50        | 0.497                             | 0.0543                                               | 0.551                                                  | 10.9                   |
| Rxn #34 | AnalytiCon Plate #3 | G6       | 50        | 0.531                             | 0.0543                                               | 0.551                                                  | 4.0                    |
| Rxn #34 | AnalytiCon Plate #3 | H6: FOC  | -         | 0.559                             | 0.0543                                               | 0.551                                                  | -1.6                   |
| Rxn #34 | AnalytiCon Plate #3 | A7: NFC  | -         | 0.056                             | 0.0543                                               | 0.551                                                  | 99.7                   |
| Rxn #34 | AnalytiCon Plate #3 | B7       | 50        | 0.485                             | 0.0543                                               | 0.551                                                  | 13.3                   |
| Rxn #34 | AnalytiCon Plate #3 | C7       | 50        | 0.521                             | 0.0543                                               | 0.551                                                  | 6.0                    |
| Rxn #34 | AnalytiCon Plate #3 | D7       | 50        | 0.247                             | 0.0543                                               | 0.551                                                  | 61.2                   |
| Rxn #34 | AnalytiCon Plate #3 | E7       | 50        | 0.438                             | 0.0543                                               | 0.551                                                  | 22.8                   |
| Rxn #34 | AnalytiCon Plate #3 | F7       | 50        | 0.466                             | 0.0543                                               | 0.551                                                  | 17.1                   |
| Rxn #34 | AnalytiCon Plate #3 | G7       | 50        | 0.527                             | 0.0543                                               | 0.551                                                  | 4.8                    |
| Rxn #34 | AnalytiCon Plate #3 | H7: FOC  | -         | 0.563                             | 0.0543                                               | 0.551                                                  | -2.4                   |
| Rxn #34 | AnalytiCon Plate #3 | A8: NFC  | -         | 0.062                             | 0.0543                                               | 0.551                                                  | 98.4                   |
| Rxn #34 | AnalytiCon Plate #3 | B8       | 50        | 0.530                             | 0.0543                                               | 0.551                                                  | 4.2                    |
| Rxn #34 | AnalytiCon Plate #3 | C8       | 50        | 0.515                             | 0.0543                                               | 0.551                                                  | 7.2                    |
| Rxn #34 | AnalytiCon Plate #3 | D8       | 50        | 0.529                             | 0.0543                                               | 0.551                                                  | 4.4                    |
| Rxn #34 | AnalytiCon Plate #3 | E8       | 50        | 0.478                             | 0.0543                                               | 0.551                                                  | 14.7                   |
| Rxn #34 | AnalytiCon Plate #3 | F8       | 50        | 0.547                             | 0.0543                                               | 0.551                                                  | 0.8                    |
| Rxn #34 | AnalytiCon Plate #3 | G8       | 50        | 0.574                             | 0.0543                                               | 0.551                                                  | -4.6                   |
| Rxn #34 | AnalytiCon Plate #3 | H8: FOC  | -         | 0.563                             | 0.0543                                               | 0.551                                                  | -2.4                   |
| Rxn #34 | AnalytiCon Plate #3 | A9: NFC  | -         | 0.061                             | 0.0543                                               | 0.551                                                  | 98.7                   |
| Rxn #34 | AnalytiCon Plate #3 | B9       | 50        | 0.497                             | 0.0543                                               | 0.551                                                  | 10.9                   |
| Rxn #34 | AnalytiCon Plate #3 | C9       | 50        | 0.440                             | 0.0543                                               | 0.551                                                  | 22.3                   |
| Rxn #34 | AnalytiCon Plate #3 | D9       | 50        | 0.513                             | 0.0543                                               | 0.551                                                  | 7.7                    |
| Rxn #34 | AnalytiCon Plate #3 | E9       | 50        | 0.476                             | 0.0543                                               | 0.551                                                  | 15.1                   |
| Rxn #34 | AnalytiCon Plate #3 | F9       | 50        | 0.527                             | 0.0543                                               | 0.551                                                  | 4.8                    |
| Rxn #34 | AnalytiCon Plate #3 | G9       | 50        | 0.542                             | 0.0543                                               | 0.551                                                  | 1.8                    |
| Rxn #34 | AnalytiCon Plate #3 | H9: FOC  | -         | 0.573                             | 0.0543                                               | 0.551                                                  | -4.4                   |
| Rxn #34 | AnalytiCon Plate #3 | A10: NFC | -         | 0.054                             | 0.0543                                               | 0.551                                                  | 100.1                  |
| Rxn #34 | AnalytiCon Plate #3 | B10      | 50        | 0.504                             | 0.0543                                               | 0.551                                                  | 9.5                    |
| Rxn #34 | AnalytiCon Plate #3 | C10      | 50        | 0.573                             | 0.0543                                               | 0.551                                                  | -4.4                   |
| Rxn #34 | AnalytiCon Plate #3 | D10      | 50        | 0.577                             | 0.0543                                               | 0.551                                                  | -5.2                   |
| Rxn #34 | AnalytiCon Plate #3 | E10      | 50        | 0.483                             | 0.0543                                               | 0.551                                                  | 13.7                   |
| Rxn #34 | AnalytiCon Plate #3 | F10      | 50        | 0.531                             | 0.0543                                               | 0.551                                                  | 4.0                    |
| Rxn #34 | AnalytiCon Plate #3 | G10      | 50        | 0.542                             | 0.0543                                               | 0.551                                                  | 1.8                    |
| Rxn #34 | AnalytiCon Plate #3 | H10: FOC | -         | 0.568                             | 0.0543                                               | 0.551                                                  | -3.4                   |
| Rxn #34 | AnalytiCon Plate #3 | A11: NFC | -         | 0.055                             | 0.0543                                               | 0.551                                                  | 99.9                   |
| Rxn #34 | AnalytiCon Plate #3 | B11      | 50        | 0.460                             | 0.0543                                               | 0.551                                                  | 18.3                   |
| Rxn #34 | AnalytiCon Plate #3 | C11      | 50        | 0.538                             | 0.0543                                               | 0.551                                                  | 2.6                    |
| Rxn #34 | AnalytiCon Plate #3 | D11      | 50        | 0.551                             | 0.0543                                               | 0.551                                                  | 0.0                    |
| Rxn #34 | AnalytiCon Plate #3 | E11      | 50        | 0.551                             | 0.0543                                               | 0.551                                                  | 0.0                    |
| Rxn #34 | AnalytiCon Plate #3 | F11      | 50        | 0.487                             | 0.0543                                               | 0.551                                                  | 12.9                   |
| Rxn #34 | AnalytiCon Plate #3 | G11      | 50        | 0.548                             | 0.0543                                               | 0.551                                                  | 0.6                    |
| Rxn #34 | AnalytiCon Plate #3 | H11: FOC | -         | 0.580                             | 0.0543                                               | 0.551                                                  | -5.8                   |
| Rxn #34 | AnalytiCon Plate #3 | A12: NFC | -         | 0.057                             | 0.0543                                               | 0.551                                                  | 99.5                   |
| Rxn #34 | AnalytiCon Plate #3 | H12: FOC | -         | 0.591                             | 0.0543                                               | 0.551                                                  | -8.1                   |
| Rxn #35 | AnalytiCon Plate #4 | A1: NFC  | -         | 0.042                             | 0.0465                                               | 0.470                                                  | 101.1                  |
| Rxn #35 | AnalytiCon Plate #4 | B1       | 50        | 0.361                             | 0.0465                                               | 0.470                                                  | 25.7                   |
| Rxn #35 | AnalytiCon Plate #4 | C1       | 50        | 0.393                             | 0.0465                                               | 0.470                                                  | 18.2                   |
| Rxn #35 | AnalytiCon Plate #4 | D1       | 50        | 0.388                             | 0.0465                                               | 0.470                                                  | 19.4                   |
| Rxn #35 | AnalytiCon Plate #4 | E1       | 50        | 0.396                             | 0.0465                                               | 0.470                                                  | 17.5                   |
| Rxn #35 | AnalytiCon Plate #4 | F1       | 50        | 0.457                             | 0.0465                                               | 0.470                                                  | 3.1                    |
| Rxn #35 | AnalytiCon Plate #4 | G1       | 50        | 0.439                             | 0.0465                                               | 0.470                                                  | 7.3                    |
| Rxn #35 | AnalytiCon Plate #4 | H1: FOC  | -         | 0.454                             | 0.0465                                               | 0.470                                                  | 3.8                    |
| Rxn #35 | AnalytiCon Plate #4 | A2: NFC  | -         | 0.045                             | 0.0465                                               | 0.470                                                  | 100.4                  |
| Rxn #35 | AnalytiCon Plate #4 | B2       | 50        | 0.446                             | 0.0465                                               | 0.470                                                  | 5.7                    |
| Rxn #35 | AnalytiCon Plate #4 | C2       | 50        | 0.431                             | 0.0465                                               | 0.470                                                  | 9.2                    |
| Rxn #35 | AnalytiCon Plate #4 | D2       | 50        | 0.452                             | 0.0465                                               | 0.470                                                  | 4.3                    |
| Rxn #35 | AnalytiCon Plate #4 | E2       | 50        | 0.395                             | 0.0465                                               | 0.470                                                  | 17.7                   |
| Rxn #35 | AnalytiCon Plate #4 | F2       | 50        | 0.087                             | 0.0465                                               | 0.470                                                  | 90.4                   |
| Rxn #35 | AnalytiCon Plate #4 | G2       | 50        | 0.461                             | 0.0465                                               | 0.470                                                  | 2.1                    |
| Rxn #35 | AnalytiCon Plate #4 | H2: FOC  | -         | 0.471                             | 0.0465                                               | 0.470                                                  | -0.2                   |
| Rxn #35 | AnalytiCon Plate #4 | A3: NFC  | -         | 0.043                             | 0.0465                                               | 0.470                                                  | 100.8                  |
| Rxn #35 | AnalytiCon Plate #4 | B3       | 50        | 0.429                             | 0.0465                                               | 0.470                                                  | 9.7                    |
| Rxn #35 | AnalytiCon Plate #4 | C3       | 50        | 0.439                             | 0.0465                                               | 0.470                                                  | 7.3                    |
| Rxn #35 | AnalytiCon Plate #4 | D3       | 50        | 0.458                             | 0.0465                                               | 0.470                                                  | 2.8                    |
| Rxn #35 | AnalytiCon Plate #4 | E3       | 50        | 0.443                             | 0.0465                                               | 0.470                                                  | 6.4                    |
| Rxn #35 | AnalytiCon Plate #4 | F3       | 50        | 0.245                             | 0.0465                                               | 0.470                                                  | 53.1                   |
| Rxn #35 | AnalytiCon Plate #4 | G3       | 50        | 0.430                             | 0.0465                                               | 0.470                                                  | 9.4                    |
| Rxn #35 | AnalytiCon Plate #4 | H3: FOC  | -         | 0.470                             | 0.0465                                               | 0.470                                                  | 0.0                    |
| Rxn #35 | AnalytiCon Plate #4 | A4: NFC  | -         | 0.033                             | 0.0465                                               | 0.470                                                  | 103.2                  |
| Rxn #35 | AnalytiCon Plate #4 | B4       | 50        | 0.439                             | 0.0465                                               | 0.470                                                  | 7.3                    |

**S3 Table. Data from Screening of Phytochemical Library for Inhibition of KHKC Activity.**

| Rxn ID  | Sample              |          |           | Sample<br>( OD <sub>340nm</sub> ) | Ave. No Fructose Controls<br>( OD <sub>340nm</sub> ) | Ave. Fructose Only Controls<br>( OD <sub>340nm</sub> ) | KHKC<br>Inhibition (%) |
|---------|---------------------|----------|-----------|-----------------------------------|------------------------------------------------------|--------------------------------------------------------|------------------------|
|         | Phytochemical Plate | Well     | Conc (µM) |                                   |                                                      |                                                        |                        |
| Rxn #35 | AnalytiCon Plate #4 | C4       | 50        | 0.318                             | 0.0465                                               | 0.470                                                  | 35.9                   |
| Rxn #35 | AnalytiCon Plate #4 | D4       | 50        | 0.427                             | 0.0465                                               | 0.470                                                  | 10.2                   |
| Rxn #35 | AnalytiCon Plate #4 | E4       | 50        | 0.395                             | 0.0465                                               | 0.470                                                  | 17.7                   |
| Rxn #35 | AnalytiCon Plate #4 | F4       | 50        | 0.446                             | 0.0465                                               | 0.470                                                  | 5.7                    |
| Rxn #35 | AnalytiCon Plate #4 | G4       | 50        | 0.448                             | 0.0465                                               | 0.470                                                  | 5.2                    |
| Rxn #35 | AnalytiCon Plate #4 | H4: FOC  | -         | 0.475                             | 0.0465                                               | 0.470                                                  | -1.2                   |
| Rxn #35 | AnalytiCon Plate #4 | A5: NFC  | -         | 0.040                             | 0.0465                                               | 0.470                                                  | 101.5                  |
| Rxn #35 | AnalytiCon Plate #4 | B5: NFC  | -         | 0.053                             | 0.0465                                               | 0.470                                                  | 98.5                   |
| Rxn #35 | AnalytiCon Plate #4 | C5: NFC  | -         | 0.048                             | 0.0465                                               | 0.470                                                  | 99.6                   |
| Rxn #35 | AnalytiCon Plate #4 | D5: NFC  | -         | 0.053                             | 0.0465                                               | 0.470                                                  | 98.5                   |
| Rxn #35 | AnalytiCon Plate #4 | E5: FOC  | -         | 0.464                             | 0.0465                                               | 0.470                                                  | 1.4                    |
| Rxn #35 | AnalytiCon Plate #4 | F5: FOC  | -         | 0.470                             | 0.0465                                               | 0.470                                                  | 0.0                    |
| Rxn #35 | AnalytiCon Plate #4 | G5: FOC  | -         | 0.473                             | 0.0465                                               | 0.470                                                  | -0.7                   |
| Rxn #35 | AnalytiCon Plate #4 | H5: FOC  | -         | 0.479                             | 0.0465                                               | 0.470                                                  | -2.1                   |
| Rxn #35 | AnalytiCon Plate #4 | A6: NFC  | -         | 0.053                             | 0.0465                                               | 0.470                                                  | 98.5                   |
| Rxn #35 | AnalytiCon Plate #4 | B6       | 50        | 0.428                             | 0.0465                                               | 0.470                                                  | 9.9                    |
| Rxn #35 | AnalytiCon Plate #4 | C6       | 50        | 0.439                             | 0.0465                                               | 0.470                                                  | 7.3                    |
| Rxn #35 | AnalytiCon Plate #4 | D6       | 50        | 0.436                             | 0.0465                                               | 0.470                                                  | 8.0                    |
| Rxn #35 | AnalytiCon Plate #4 | E6       | 50        | 0.436                             | 0.0465                                               | 0.470                                                  | 8.0                    |
| Rxn #35 | AnalytiCon Plate #4 | F6       | 50        | 0.457                             | 0.0465                                               | 0.470                                                  | 3.1                    |
| Rxn #35 | AnalytiCon Plate #4 | G6       | 50        | 0.429                             | 0.0465                                               | 0.470                                                  | 9.7                    |
| Rxn #35 | AnalytiCon Plate #4 | H6: FOC  | -         | 0.478                             | 0.0465                                               | 0.470                                                  | -1.9                   |
| Rxn #35 | AnalytiCon Plate #4 | A7: NFC  | -         | 0.049                             | 0.0465                                               | 0.470                                                  | 99.4                   |
| Rxn #35 | AnalytiCon Plate #4 | B7       | 50        | 0.425                             | 0.0465                                               | 0.470                                                  | 10.6                   |
| Rxn #35 | AnalytiCon Plate #4 | C7       | 50        | 0.431                             | 0.0465                                               | 0.470                                                  | 9.2                    |
| Rxn #35 | AnalytiCon Plate #4 | D7       | 50        | 0.440                             | 0.0465                                               | 0.470                                                  | 7.1                    |
| Rxn #35 | AnalytiCon Plate #4 | E7       | 50        | 0.442                             | 0.0465                                               | 0.470                                                  | 6.6                    |
| Rxn #35 | AnalytiCon Plate #4 | F7       | 50        | 0.460                             | 0.0465                                               | 0.470                                                  | 2.4                    |
| Rxn #35 | AnalytiCon Plate #4 | G7       | 50        | 0.517                             | 0.0465                                               | 0.470                                                  | -11.1                  |
| Rxn #35 | AnalytiCon Plate #4 | H7: FOC  | -         | 0.467                             | 0.0465                                               | 0.470                                                  | 0.7                    |
| Rxn #35 | AnalytiCon Plate #4 | A8: NFC  | -         | 0.051                             | 0.0465                                               | 0.470                                                  | 98.9                   |
| Rxn #35 | AnalytiCon Plate #4 | B8       | 50        | 0.416                             | 0.0465                                               | 0.470                                                  | 12.8                   |
| Rxn #35 | AnalytiCon Plate #4 | C8       | 50        | 0.431                             | 0.0465                                               | 0.470                                                  | 9.2                    |
| Rxn #35 | AnalytiCon Plate #4 | D8       | 50        | 0.466                             | 0.0465                                               | 0.470                                                  | 0.9                    |
| Rxn #35 | AnalytiCon Plate #4 | E8       | 50        | 0.472                             | 0.0465                                               | 0.470                                                  | -0.5                   |
| Rxn #35 | AnalytiCon Plate #4 | F8       | 50        | 0.462                             | 0.0465                                               | 0.470                                                  | 1.9                    |
| Rxn #35 | AnalytiCon Plate #4 | G8       | 50        | 0.453                             | 0.0465                                               | 0.470                                                  | 4.0                    |
| Rxn #35 | AnalytiCon Plate #4 | H8: FOC  | -         | 0.485                             | 0.0465                                               | 0.470                                                  | -3.5                   |
| Rxn #35 | AnalytiCon Plate #4 | A9: NFC  | -         | 0.046                             | 0.0465                                               | 0.470                                                  | 100.1                  |
| Rxn #35 | AnalytiCon Plate #4 | B9       | 50        | 0.502                             | 0.0465                                               | 0.470                                                  | -7.6                   |
| Rxn #35 | AnalytiCon Plate #4 | C9       | 50        | 0.170                             | 0.0465                                               | 0.470                                                  | 70.8                   |
| Rxn #35 | AnalytiCon Plate #4 | D9       | 50        | 0.429                             | 0.0465                                               | 0.470                                                  | 9.7                    |
| Rxn #35 | AnalytiCon Plate #4 | E9       | 50        | 0.453                             | 0.0465                                               | 0.470                                                  | 4.0                    |
| Rxn #35 | AnalytiCon Plate #4 | F9       | 50        | 0.461                             | 0.0465                                               | 0.470                                                  | 2.1                    |
| Rxn #35 | AnalytiCon Plate #4 | G9       | 50        | 0.412                             | 0.0465                                               | 0.470                                                  | 13.7                   |
| Rxn #35 | AnalytiCon Plate #4 | H9: FOC  | -         | 0.481                             | 0.0465                                               | 0.470                                                  | -2.6                   |
| Rxn #35 | AnalytiCon Plate #4 | A10: NFC | -         | 0.046                             | 0.0465                                               | 0.470                                                  | 100.1                  |
| Rxn #35 | AnalytiCon Plate #4 | B10      | 50        | 0.441                             | 0.0465                                               | 0.470                                                  | 6.8                    |
| Rxn #35 | AnalytiCon Plate #4 | C10      | 50        | 0.466                             | 0.0465                                               | 0.470                                                  | 0.9                    |
| Rxn #35 | AnalytiCon Plate #4 | D10      | 50        | 0.465                             | 0.0465                                               | 0.470                                                  | 1.2                    |
| Rxn #35 | AnalytiCon Plate #4 | E10      | 50        | 0.313                             | 0.0465                                               | 0.470                                                  | 37.1                   |
| Rxn #35 | AnalytiCon Plate #4 | F10      | 50        | 0.463                             | 0.0465                                               | 0.470                                                  | 1.7                    |
| Rxn #35 | AnalytiCon Plate #4 | G10      | 50        | 0.469                             | 0.0465                                               | 0.470                                                  | 0.2                    |
| Rxn #35 | AnalytiCon Plate #4 | H10: FOC | -         | 0.476                             | 0.0465                                               | 0.470                                                  | -1.4                   |
| Rxn #35 | AnalytiCon Plate #4 | A11: NFC | -         | 0.042                             | 0.0465                                               | 0.470                                                  | 101.1                  |
| Rxn #35 | AnalytiCon Plate #4 | B11      | 50        | 0.439                             | 0.0465                                               | 0.470                                                  | 7.3                    |
| Rxn #35 | AnalytiCon Plate #4 | C11      | 50        | 0.453                             | 0.0465                                               | 0.470                                                  | 4.0                    |
| Rxn #35 | AnalytiCon Plate #4 | D11      | 50        | 0.463                             | 0.0465                                               | 0.470                                                  | 1.7                    |
| Rxn #35 | AnalytiCon Plate #4 | E11      | 50        | 0.470                             | 0.0465                                               | 0.470                                                  | 0.0                    |
| Rxn #35 | AnalytiCon Plate #4 | F11      | 50        | 0.466                             | 0.0465                                               | 0.470                                                  | 0.9                    |
| Rxn #35 | AnalytiCon Plate #4 | G11      | 50        | 0.427                             | 0.0465                                               | 0.470                                                  | 10.2                   |
| Rxn #35 | AnalytiCon Plate #4 | H11: FOC | -         | 0.471                             | 0.0465                                               | 0.470                                                  | -0.2                   |
| Rxn #35 | AnalytiCon Plate #4 | A12: NFC | -         | 0.054                             | 0.0465                                               | 0.470                                                  | 98.2                   |
| Rxn #35 | AnalytiCon Plate #4 | H12: FOC | -         | 0.454                             | 0.0465                                               | 0.470                                                  | 3.8                    |
| Rxn #36 | AnalytiCon Plate #5 | A1: NFC  | -         | 0.090                             | 0.0941                                               | 0.611                                                  | 100.8                  |
| Rxn #36 | AnalytiCon Plate #5 | B1       | 50        | 0.518                             | 0.0941                                               | 0.611                                                  | 18.0                   |
| Rxn #36 | AnalytiCon Plate #5 | C1       | 50        | 0.518                             | 0.0941                                               | 0.611                                                  | 18.0                   |
| Rxn #36 | AnalytiCon Plate #5 | D1       | 50        | 0.585                             | 0.0941                                               | 0.611                                                  | 5.0                    |
| Rxn #36 | AnalytiCon Plate #5 | E1       | 50        | 0.517                             | 0.0941                                               | 0.611                                                  | 18.2                   |
| Rxn #36 | AnalytiCon Plate #5 | F1       | 50        | 0.583                             | 0.0941                                               | 0.611                                                  | 5.4                    |
| Rxn #36 | AnalytiCon Plate #5 | G1       | 50        | 0.565                             | 0.0941                                               | 0.611                                                  | 8.9                    |
| Rxn #36 | AnalytiCon Plate #5 | H1: FOC  | -         | 0.583                             | 0.0941                                               | 0.611                                                  | 5.4                    |
| Rxn #36 | AnalytiCon Plate #5 | A2: NFC  | -         | 0.094                             | 0.0941                                               | 0.611                                                  | 100.0                  |
| Rxn #36 | AnalytiCon Plate #5 | B2       | 50        | 0.592                             | 0.0941                                               | 0.611                                                  | 3.7                    |

**S3 Table. Data from Screening of Phytochemical Library for Inhibition of KHKC Activity.**

| Rxn ID  | Sample              |          |           | Sample<br>( OD <sub>340nm</sub> ) | Ave. No Fructose Controls<br>( OD <sub>340nm</sub> ) | Ave. Fructose Only Controls<br>( OD <sub>340nm</sub> ) | KHKC<br>Inhibition (%) |
|---------|---------------------|----------|-----------|-----------------------------------|------------------------------------------------------|--------------------------------------------------------|------------------------|
|         | Phytochemical Plate | Well     | Conc (µM) |                                   |                                                      |                                                        |                        |
| Rxn #36 | AnalytiCon Plate #5 | C2       | 50        | 0.415                             | 0.0941                                               | 0.611                                                  | 37.9                   |
| Rxn #36 | AnalytiCon Plate #5 | D2       | 50        | 0.577                             | 0.0941                                               | 0.611                                                  | 6.6                    |
| Rxn #36 | AnalytiCon Plate #5 | E2       | 50        | 0.594                             | 0.0941                                               | 0.611                                                  | 3.3                    |
| Rxn #36 | AnalytiCon Plate #5 | F2       | 50        | 0.588                             | 0.0941                                               | 0.611                                                  | 4.4                    |
| Rxn #36 | AnalytiCon Plate #5 | G2       | 50        | 0.604                             | 0.0941                                               | 0.611                                                  | 1.4                    |
| Rxn #36 | AnalytiCon Plate #5 | H2: FOC  | -         | 0.615                             | 0.0941                                               | 0.611                                                  | -0.8                   |
| Rxn #36 | AnalytiCon Plate #5 | A3: NFC  | -         | 0.092                             | 0.0941                                               | 0.611                                                  | 100.4                  |
| Rxn #36 | AnalytiCon Plate #5 | B3       | 50        | 0.613                             | 0.0941                                               | 0.611                                                  | -0.4                   |
| Rxn #36 | AnalytiCon Plate #5 | C3       | 50        | 0.617                             | 0.0941                                               | 0.611                                                  | -1.2                   |
| Rxn #36 | AnalytiCon Plate #5 | D3       | 50        | 0.598                             | 0.0941                                               | 0.611                                                  | 2.5                    |
| Rxn #36 | AnalytiCon Plate #5 | E3       | 50        | 0.626                             | 0.0941                                               | 0.611                                                  | -2.9                   |
| Rxn #36 | AnalytiCon Plate #5 | F3       | 50        | 0.602                             | 0.0941                                               | 0.611                                                  | 1.7                    |
| Rxn #36 | AnalytiCon Plate #5 | G3       | 50        | 0.627                             | 0.0941                                               | 0.611                                                  | -3.1                   |
| Rxn #36 | AnalytiCon Plate #5 | H3: FOC  | -         | 0.614                             | 0.0941                                               | 0.611                                                  | -0.6                   |
| Rxn #36 | AnalytiCon Plate #5 | A4: NFC  | -         | 0.084                             | 0.0941                                               | 0.611                                                  | 102.0                  |
| Rxn #36 | AnalytiCon Plate #5 | B4       | 50        | 0.624                             | 0.0941                                               | 0.611                                                  | -2.5                   |
| Rxn #36 | AnalytiCon Plate #5 | C4       | 50        | 0.613                             | 0.0941                                               | 0.611                                                  | -0.4                   |
| Rxn #36 | AnalytiCon Plate #5 | D4       | 50        | 0.630                             | 0.0941                                               | 0.611                                                  | -3.7                   |
| Rxn #36 | AnalytiCon Plate #5 | E4       | 50        | 0.613                             | 0.0941                                               | 0.611                                                  | -0.4                   |
| Rxn #36 | AnalytiCon Plate #5 | F4       | 50        | 0.609                             | 0.0941                                               | 0.611                                                  | 0.4                    |
| Rxn #36 | AnalytiCon Plate #5 | G4       | 50        | 0.579                             | 0.0941                                               | 0.611                                                  | 6.2                    |
| Rxn #36 | AnalytiCon Plate #5 | H4: FOC  | -         | 0.616                             | 0.0941                                               | 0.611                                                  | -1.0                   |
| Rxn #36 | AnalytiCon Plate #5 | A5: NFC  | -         | 0.101                             | 0.0941                                               | 0.611                                                  | 98.7                   |
| Rxn #36 | AnalytiCon Plate #5 | B5: NFC  | -         | 0.082                             | 0.0941                                               | 0.611                                                  | 102.3                  |
| Rxn #36 | AnalytiCon Plate #5 | C5: NFC  | -         | 0.079                             | 0.0941                                               | 0.611                                                  | 102.9                  |
| Rxn #36 | AnalytiCon Plate #5 | D5: NFC  | -         | 0.081                             | 0.0941                                               | 0.611                                                  | 102.5                  |
| Rxn #36 | AnalytiCon Plate #5 | E5: FOC  | -         | 0.624                             | 0.0941                                               | 0.611                                                  | -2.5                   |
| Rxn #36 | AnalytiCon Plate #5 | F5: FOC  | -         | 0.613                             | 0.0941                                               | 0.611                                                  | -0.4                   |
| Rxn #36 | AnalytiCon Plate #5 | G5: FOC  | -         | 0.604                             | 0.0941                                               | 0.611                                                  | 1.4                    |
| Rxn #36 | AnalytiCon Plate #5 | H5: FOC  | -         | 0.617                             | 0.0941                                               | 0.611                                                  | -1.2                   |
| Rxn #36 | AnalytiCon Plate #5 | A6: NFC  | -         | 0.093                             | 0.0941                                               | 0.611                                                  | 100.2                  |
| Rxn #36 | AnalytiCon Plate #5 | B6       | 50        | 0.602                             | 0.0941                                               | 0.611                                                  | 1.7                    |
| Rxn #36 | AnalytiCon Plate #5 | C6       | 50        | 0.545                             | 0.0941                                               | 0.611                                                  | 12.8                   |
| Rxn #36 | AnalytiCon Plate #5 | D6       | 50        | 0.605                             | 0.0941                                               | 0.611                                                  | 1.2                    |
| Rxn #36 | AnalytiCon Plate #5 | E6       | 50        | 0.619                             | 0.0941                                               | 0.611                                                  | -1.5                   |
| Rxn #36 | AnalytiCon Plate #5 | F6       | 50        | 0.611                             | 0.0941                                               | 0.611                                                  | 0.0                    |
| Rxn #36 | AnalytiCon Plate #5 | G6       | 50        | 0.588                             | 0.0941                                               | 0.611                                                  | 4.4                    |
| Rxn #36 | AnalytiCon Plate #5 | H6: FOC  | -         | 0.613                             | 0.0941                                               | 0.611                                                  | -0.4                   |
| Rxn #36 | AnalytiCon Plate #5 | A7: NFC  | -         | 0.102                             | 0.0941                                               | 0.611                                                  | 98.5                   |
| Rxn #36 | AnalytiCon Plate #5 | B7       | 50        | 0.609                             | 0.0941                                               | 0.611                                                  | 0.4                    |
| Rxn #36 | AnalytiCon Plate #5 | C7       | 50        | 0.569                             | 0.0941                                               | 0.611                                                  | 8.1                    |
| Rxn #36 | AnalytiCon Plate #5 | D7       | 50        | 0.593                             | 0.0941                                               | 0.611                                                  | 3.5                    |
| Rxn #36 | AnalytiCon Plate #5 | E7       | 50        | 0.607                             | 0.0941                                               | 0.611                                                  | 0.8                    |
| Rxn #36 | AnalytiCon Plate #5 | F7       | 50        | 0.590                             | 0.0941                                               | 0.611                                                  | 4.1                    |
| Rxn #36 | AnalytiCon Plate #5 | G7       | 50        | 0.581                             | 0.0941                                               | 0.611                                                  | 5.8                    |
| Rxn #36 | AnalytiCon Plate #5 | H7: FOC  | -         | 0.613                             | 0.0941                                               | 0.611                                                  | -0.4                   |
| Rxn #36 | AnalytiCon Plate #5 | A8: NFC  | -         | 0.090                             | 0.0941                                               | 0.611                                                  | 100.8                  |
| Rxn #36 | AnalytiCon Plate #5 | B8       | 50        | 0.573                             | 0.0941                                               | 0.611                                                  | 7.4                    |
| Rxn #36 | AnalytiCon Plate #5 | C8       | 50        | 0.603                             | 0.0941                                               | 0.611                                                  | 1.5                    |
| Rxn #36 | AnalytiCon Plate #5 | D8       | 50        | 0.615                             | 0.0941                                               | 0.611                                                  | -0.8                   |
| Rxn #36 | AnalytiCon Plate #5 | E8       | 50        | 0.523                             | 0.0941                                               | 0.611                                                  | 17.0                   |
| Rxn #36 | AnalytiCon Plate #5 | F8       | 50        | 0.620                             | 0.0941                                               | 0.611                                                  | -1.7                   |
| Rxn #36 | AnalytiCon Plate #5 | G8       | 50        | 0.615                             | 0.0941                                               | 0.611                                                  | -0.8                   |
| Rxn #36 | AnalytiCon Plate #5 | H8: FOC  | -         | 0.616                             | 0.0941                                               | 0.611                                                  | -1.0                   |
| Rxn #36 | AnalytiCon Plate #5 | A9: NFC  | -         | 0.095                             | 0.0941                                               | 0.611                                                  | 99.8                   |
| Rxn #36 | AnalytiCon Plate #5 | B9       | 50        | 0.593                             | 0.0941                                               | 0.611                                                  | 3.5                    |
| Rxn #36 | AnalytiCon Plate #5 | C9       | 50        | 0.625                             | 0.0941                                               | 0.611                                                  | -2.7                   |
| Rxn #36 | AnalytiCon Plate #5 | D9       | 50        | 0.620                             | 0.0941                                               | 0.611                                                  | -1.7                   |
| Rxn #36 | AnalytiCon Plate #5 | E9       | 50        | 0.620                             | 0.0941                                               | 0.611                                                  | -1.7                   |
| Rxn #36 | AnalytiCon Plate #5 | F9       | 50        | 0.598                             | 0.0941                                               | 0.611                                                  | 2.5                    |
| Rxn #36 | AnalytiCon Plate #5 | G9       | 50        | 0.611                             | 0.0941                                               | 0.611                                                  | 0.0                    |
| Rxn #36 | AnalytiCon Plate #5 | H9: FOC  | -         | 0.610                             | 0.0941                                               | 0.611                                                  | 0.2                    |
| Rxn #36 | AnalytiCon Plate #5 | A10: NFC | -         | 0.108                             | 0.0941                                               | 0.611                                                  | 97.3                   |
| Rxn #36 | AnalytiCon Plate #5 | B10      | 50        | 0.617                             | 0.0941                                               | 0.611                                                  | -1.2                   |
| Rxn #36 | AnalytiCon Plate #5 | C10      | 50        | 0.617                             | 0.0941                                               | 0.611                                                  | -1.2                   |
| Rxn #36 | AnalytiCon Plate #5 | D10      | 50        | 0.628                             | 0.0941                                               | 0.611                                                  | -3.3                   |
| Rxn #36 | AnalytiCon Plate #5 | E10      | 50        | 0.615                             | 0.0941                                               | 0.611                                                  | -0.8                   |
| Rxn #36 | AnalytiCon Plate #5 | F10      | 50        | 0.627                             | 0.0941                                               | 0.611                                                  | -3.1                   |
| Rxn #36 | AnalytiCon Plate #5 | G10      | 50        | 0.228                             | 0.0941                                               | 0.611                                                  | 74.1                   |
| Rxn #36 | AnalytiCon Plate #5 | H10: FOC | -         | 0.639                             | 0.0941                                               | 0.611                                                  | -5.4                   |
| Rxn #36 | AnalytiCon Plate #5 | A11: NFC | -         | 0.110                             | 0.0941                                               | 0.611                                                  | 96.9                   |
| Rxn #36 | AnalytiCon Plate #5 | B11      | 50        | 0.598                             | 0.0941                                               | 0.611                                                  | 2.5                    |
| Rxn #36 | AnalytiCon Plate #5 | C11      | 50        | 0.513                             | 0.0941                                               | 0.611                                                  | 19.0                   |
| Rxn #36 | AnalytiCon Plate #5 | D11      | 50        | 0.621                             | 0.0941                                               | 0.611                                                  | -1.9                   |

**S3 Table. Data from Screening of Phytochemical Library for Inhibition of KHKC Activity.**

| Rxn ID  | Sample              |          |           | Sample<br>( OD <sub>340nm</sub> ) | Ave. No Fructose Controls<br>( OD <sub>340nm</sub> ) | Ave. Fructose Only Controls<br>( OD <sub>340nm</sub> ) | KHKC<br>Inhibition (%) |
|---------|---------------------|----------|-----------|-----------------------------------|------------------------------------------------------|--------------------------------------------------------|------------------------|
|         | Phytochemical Plate | Well     | Conc (µM) |                                   |                                                      |                                                        |                        |
| Rxn #36 | AnalytiCon Plate #5 | E11      | 50        | 0.635                             | 0.0941                                               | 0.611                                                  | -4.6                   |
| Rxn #36 | AnalytiCon Plate #5 | F11      | 50        | 0.616                             | 0.0941                                               | 0.611                                                  | -1.0                   |
| Rxn #36 | AnalytiCon Plate #5 | G11      | 50        | 0.610                             | 0.0941                                               | 0.611                                                  | 0.2                    |
| Rxn #36 | AnalytiCon Plate #5 | H11: FOC | -         | 0.631                             | 0.0941                                               | 0.611                                                  | -3.9                   |
| Rxn #36 | AnalytiCon Plate #5 | A12: NFC | -         | 0.110                             | 0.0941                                               | 0.611                                                  | 96.9                   |
| Rxn #36 | AnalytiCon Plate #5 | H12: FOC | -         | 0.602                             | 0.0941                                               | 0.611                                                  | 1.7                    |
| Rxn #37 | AnalytiCon Plate #6 | A1: NFC  | -         | 0.064                             | 0.0954                                               | 0.536                                                  | 107.1                  |
| Rxn #37 | AnalytiCon Plate #6 | B1       | 50        | 0.511                             | 0.0954                                               | 0.536                                                  | 5.7                    |
| Rxn #37 | AnalytiCon Plate #6 | C1       | 50        | 0.501                             | 0.0954                                               | 0.536                                                  | 7.9                    |
| Rxn #37 | AnalytiCon Plate #6 | D1       | 50        | 0.478                             | 0.0954                                               | 0.536                                                  | 13.2                   |
| Rxn #37 | AnalytiCon Plate #6 | E1       | 50        | 0.329                             | 0.0954                                               | 0.536                                                  | 47.0                   |
| Rxn #37 | AnalytiCon Plate #6 | F1       | 50        | 0.432                             | 0.0954                                               | 0.536                                                  | 23.6                   |
| Rxn #37 | AnalytiCon Plate #6 | G1       | 50        | 0.484                             | 0.0954                                               | 0.536                                                  | 11.8                   |
| Rxn #37 | AnalytiCon Plate #6 | H1: FOC  | -         | 0.505                             | 0.0954                                               | 0.536                                                  | 7.0                    |
| Rxn #37 | AnalytiCon Plate #6 | A2: NFC  | -         | 0.131                             | 0.0954                                               | 0.536                                                  | 91.9                   |
| Rxn #37 | AnalytiCon Plate #6 | B2       | 50        | 0.552                             | 0.0954                                               | 0.536                                                  | -3.6                   |
| Rxn #37 | AnalytiCon Plate #6 | C2       | 50        | 0.487                             | 0.0954                                               | 0.536                                                  | 11.1                   |
| Rxn #37 | AnalytiCon Plate #6 | D2       | 50        | 0.527                             | 0.0954                                               | 0.536                                                  | 2.0                    |
| Rxn #37 | AnalytiCon Plate #6 | E2       | 50        | 0.514                             | 0.0954                                               | 0.536                                                  | 5.0                    |
| Rxn #37 | AnalytiCon Plate #6 | F2       | 50        | 0.507                             | 0.0954                                               | 0.536                                                  | 6.6                    |
| Rxn #37 | AnalytiCon Plate #6 | G2       | 50        | 0.459                             | 0.0954                                               | 0.536                                                  | 17.5                   |
| Rxn #37 | AnalytiCon Plate #6 | H2: FOC  | -         | 0.538                             | 0.0954                                               | 0.536                                                  | -0.5                   |
| Rxn #37 | AnalytiCon Plate #6 | A3: NFC  | -         | 0.094                             | 0.0954                                               | 0.536                                                  | 100.3                  |
| Rxn #37 | AnalytiCon Plate #6 | B3       | 50        | 0.546                             | 0.0954                                               | 0.536                                                  | -2.3                   |
| Rxn #37 | AnalytiCon Plate #6 | C3       | 50        | 0.511                             | 0.0954                                               | 0.536                                                  | 5.7                    |
| Rxn #37 | AnalytiCon Plate #6 | D3       | 50        | 0.496                             | 0.0954                                               | 0.536                                                  | 9.1                    |
| Rxn #37 | AnalytiCon Plate #6 | E3       | 50        | 0.463                             | 0.0954                                               | 0.536                                                  | 16.6                   |
| Rxn #37 | AnalytiCon Plate #6 | F3       | 50        | 0.529                             | 0.0954                                               | 0.536                                                  | 1.6                    |
| Rxn #37 | AnalytiCon Plate #6 | G3       | 50        | 0.503                             | 0.0954                                               | 0.536                                                  | 7.5                    |
| Rxn #37 | AnalytiCon Plate #6 | H3: FOC  | -         | 0.541                             | 0.0954                                               | 0.536                                                  | -1.1                   |
| Rxn #37 | AnalytiCon Plate #6 | A4: NFC  | -         | 0.087                             | 0.0954                                               | 0.536                                                  | 101.9                  |
| Rxn #37 | AnalytiCon Plate #6 | B4       | 50        | 0.544                             | 0.0954                                               | 0.536                                                  | -1.8                   |
| Rxn #37 | AnalytiCon Plate #6 | C4       | 50        | 0.534                             | 0.0954                                               | 0.536                                                  | 0.5                    |
| Rxn #37 | AnalytiCon Plate #6 | D4       | 50        | 0.473                             | 0.0954                                               | 0.536                                                  | 14.3                   |
| Rxn #37 | AnalytiCon Plate #6 | E4       | 50        | 0.514                             | 0.0954                                               | 0.536                                                  | 5.0                    |
| Rxn #37 | AnalytiCon Plate #6 | F4       | 50        | 0.512                             | 0.0954                                               | 0.536                                                  | 5.4                    |
| Rxn #37 | AnalytiCon Plate #6 | G4       | 50        | 0.517                             | 0.0954                                               | 0.536                                                  | 4.3                    |
| Rxn #37 | AnalytiCon Plate #6 | H4: FOC  | -         | 0.538                             | 0.0954                                               | 0.536                                                  | -0.5                   |
| Rxn #37 | AnalytiCon Plate #6 | A5: NFC  | -         | 0.094                             | 0.0954                                               | 0.536                                                  | 100.3                  |
| Rxn #37 | AnalytiCon Plate #6 | B5: NFC  | -         | 0.081                             | 0.0954                                               | 0.536                                                  | 103.3                  |
| Rxn #37 | AnalytiCon Plate #6 | C5: NFC  | -         | 0.072                             | 0.0954                                               | 0.536                                                  | 105.3                  |
| Rxn #37 | AnalytiCon Plate #6 | D5: NFC  | -         | 0.093                             | 0.0954                                               | 0.536                                                  | 100.5                  |
| Rxn #37 | AnalytiCon Plate #6 | E5: FOC  | -         | 0.537                             | 0.0954                                               | 0.536                                                  | -0.2                   |
| Rxn #37 | AnalytiCon Plate #6 | F5: FOC  | -         | 0.527                             | 0.0954                                               | 0.536                                                  | 2.0                    |
| Rxn #37 | AnalytiCon Plate #6 | G5: FOC  | -         | 0.530                             | 0.0954                                               | 0.536                                                  | 1.4                    |
| Rxn #37 | AnalytiCon Plate #6 | H5: FOC  | -         | 0.552                             | 0.0954                                               | 0.536                                                  | -3.6                   |
| Rxn #37 | AnalytiCon Plate #6 | A6: NFC  | -         | 0.099                             | 0.0954                                               | 0.536                                                  | 99.2                   |
| Rxn #37 | AnalytiCon Plate #6 | B6       | 50        | 0.548                             | 0.0954                                               | 0.536                                                  | -2.7                   |
| Rxn #37 | AnalytiCon Plate #6 | C6       | 50        | 0.543                             | 0.0954                                               | 0.536                                                  | -1.6                   |
| Rxn #37 | AnalytiCon Plate #6 | D6       | 50        | 0.526                             | 0.0954                                               | 0.536                                                  | 2.3                    |
| Rxn #37 | AnalytiCon Plate #6 | E6       | 50        | 0.529                             | 0.0954                                               | 0.536                                                  | 1.6                    |
| Rxn #37 | AnalytiCon Plate #6 | F6       | 50        | 0.518                             | 0.0954                                               | 0.536                                                  | 4.1                    |
| Rxn #37 | AnalytiCon Plate #6 | G6       | 50        | 0.509                             | 0.0954                                               | 0.536                                                  | 6.1                    |
| Rxn #37 | AnalytiCon Plate #6 | H6: FOC  | -         | 0.547                             | 0.0954                                               | 0.536                                                  | -2.5                   |
| Rxn #37 | AnalytiCon Plate #6 | A7: NFC  | -         | 0.095                             | 0.0954                                               | 0.536                                                  | 100.1                  |
| Rxn #37 | AnalytiCon Plate #6 | B7       | 50        | 0.542                             | 0.0954                                               | 0.536                                                  | -1.4                   |
| Rxn #37 | AnalytiCon Plate #6 | C7       | 50        | 0.545                             | 0.0954                                               | 0.536                                                  | -2.0                   |
| Rxn #37 | AnalytiCon Plate #6 | D7       | 50        | 0.508                             | 0.0954                                               | 0.536                                                  | 6.4                    |
| Rxn #37 | AnalytiCon Plate #6 | E7       | 50        | 0.530                             | 0.0954                                               | 0.536                                                  | 1.4                    |
| Rxn #37 | AnalytiCon Plate #6 | F7       | 50        | 0.462                             | 0.0954                                               | 0.536                                                  | 16.8                   |
| Rxn #37 | AnalytiCon Plate #6 | G7       | 50        | 0.495                             | 0.0954                                               | 0.536                                                  | 9.3                    |
| Rxn #37 | AnalytiCon Plate #6 | H7: FOC  | -         | 0.543                             | 0.0954                                               | 0.536                                                  | -1.6                   |
| Rxn #37 | AnalytiCon Plate #6 | A8: NFC  | -         | 0.091                             | 0.0954                                               | 0.536                                                  | 101.0                  |
| Rxn #37 | AnalytiCon Plate #6 | B8       | 50        | 0.530                             | 0.0954                                               | 0.536                                                  | 1.4                    |
| Rxn #37 | AnalytiCon Plate #6 | C8       | 50        | 0.543                             | 0.0954                                               | 0.536                                                  | -1.6                   |
| Rxn #37 | AnalytiCon Plate #6 | D8       | 50        | 0.483                             | 0.0954                                               | 0.536                                                  | 12.0                   |
| Rxn #37 | AnalytiCon Plate #6 | E8       | 50        | 0.482                             | 0.0954                                               | 0.536                                                  | 12.3                   |
| Rxn #37 | AnalytiCon Plate #6 | F8       | 50        | 0.486                             | 0.0954                                               | 0.536                                                  | 11.3                   |
| Rxn #37 | AnalytiCon Plate #6 | G8       | 50        | 0.474                             | 0.0954                                               | 0.536                                                  | 14.1                   |
| Rxn #37 | AnalytiCon Plate #6 | H8: FOC  | -         | 0.547                             | 0.0954                                               | 0.536                                                  | -2.5                   |
| Rxn #37 | AnalytiCon Plate #6 | A9: NFC  | -         | 0.091                             | 0.0954                                               | 0.536                                                  | 101.0                  |
| Rxn #37 | AnalytiCon Plate #6 | B9       | 50        | 0.540                             | 0.0954                                               | 0.536                                                  | -0.9                   |
| Rxn #37 | AnalytiCon Plate #6 | C9       | 50        | 0.530                             | 0.0954                                               | 0.536                                                  | 1.4                    |
| Rxn #37 | AnalytiCon Plate #6 | D9       | 50        | 0.515                             | 0.0954                                               | 0.536                                                  | 4.8                    |

**S3 Table. Data from Screening of Phytochemical Library for Inhibition of KHKC Activity.**

| Rxn ID  | Sample              |          |           | Sample<br>( OD <sub>340nm</sub> ) | Ave. No Fructose Controls<br>( OD <sub>340nm</sub> ) | Ave. Fructose Only Controls<br>( OD <sub>340nm</sub> ) | KHKC<br>Inhibition (%) |
|---------|---------------------|----------|-----------|-----------------------------------|------------------------------------------------------|--------------------------------------------------------|------------------------|
|         | Phytochemical Plate | Well     | Conc (µM) |                                   |                                                      |                                                        |                        |
| Rxn #37 | AnalytiCon Plate #6 | E9       | 50        | 0.512                             | 0.0954                                               | 0.536                                                  | 5.4                    |
| Rxn #37 | AnalytiCon Plate #6 | F9       | 50        | 0.521                             | 0.0954                                               | 0.536                                                  | 3.4                    |
| Rxn #37 | AnalytiCon Plate #6 | G9       | 50        | 0.471                             | 0.0954                                               | 0.536                                                  | 14.8                   |
| Rxn #37 | AnalytiCon Plate #6 | H9: FOC  | -         | 0.548                             | 0.0954                                               | 0.536                                                  | -2.7                   |
| Rxn #37 | AnalytiCon Plate #6 | A10: NFC | -         | 0.095                             | 0.0954                                               | 0.536                                                  | 100.1                  |
| Rxn #37 | AnalytiCon Plate #6 | B10      | 50        | 0.458                             | 0.0954                                               | 0.536                                                  | 17.7                   |
| Rxn #37 | AnalytiCon Plate #6 | C10      | 50        | 0.526                             | 0.0954                                               | 0.536                                                  | 2.3                    |
| Rxn #37 | AnalytiCon Plate #6 | D10      | 50        | 0.517                             | 0.0954                                               | 0.536                                                  | 4.3                    |
| Rxn #37 | AnalytiCon Plate #6 | E10      | 50        | 0.514                             | 0.0954                                               | 0.536                                                  | 5.0                    |
| Rxn #37 | AnalytiCon Plate #6 | F10      | 50        | 0.519                             | 0.0954                                               | 0.536                                                  | 3.9                    |
| Rxn #37 | AnalytiCon Plate #6 | G10      | 50        | 0.478                             | 0.0954                                               | 0.536                                                  | 13.2                   |
| Rxn #37 | AnalytiCon Plate #6 | H10: FOC | -         | 0.557                             | 0.0954                                               | 0.536                                                  | -4.8                   |
| Rxn #37 | AnalytiCon Plate #6 | A11: NFC | -         | 0.142                             | 0.0954                                               | 0.536                                                  | 89.4                   |
| Rxn #37 | AnalytiCon Plate #6 | B11      | 50        | 0.549                             | 0.0954                                               | 0.536                                                  | -3.0                   |
| Rxn #37 | AnalytiCon Plate #6 | C11      | 50        | 0.456                             | 0.0954                                               | 0.536                                                  | 18.2                   |
| Rxn #37 | AnalytiCon Plate #6 | D11      | 50        | 0.518                             | 0.0954                                               | 0.536                                                  | 4.1                    |
| Rxn #37 | AnalytiCon Plate #6 | E11      | 50        | 0.472                             | 0.0954                                               | 0.536                                                  | 14.5                   |
| Rxn #37 | AnalytiCon Plate #6 | F11      | 50        | 0.532                             | 0.0954                                               | 0.536                                                  | 0.9                    |
| Rxn #37 | AnalytiCon Plate #6 | G11      | 50        | 0.531                             | 0.0954                                               | 0.536                                                  | 1.1                    |
| Rxn #37 | AnalytiCon Plate #6 | H11: FOC | -         | 0.542                             | 0.0954                                               | 0.536                                                  | -1.4                   |
| Rxn #37 | AnalytiCon Plate #6 | A12: NFC | -         | 0.102                             | 0.0954                                               | 0.536                                                  | 98.5                   |
| Rxn #37 | AnalytiCon Plate #6 | H12: FOC | -         | 0.550                             | 0.0954                                               | 0.536                                                  | -3.2                   |
| Rxn #38 | AnalytiCon Plate #7 | A1: NFC  | -         | 0.071                             | 0.0664                                               | 0.621                                                  | 99.2                   |
| Rxn #38 | AnalytiCon Plate #7 | B1       | 50        | 0.580                             | 0.0664                                               | 0.621                                                  | 7.4                    |
| Rxn #38 | AnalytiCon Plate #7 | C1       | 50        | 0.574                             | 0.0664                                               | 0.621                                                  | 8.5                    |
| Rxn #38 | AnalytiCon Plate #7 | D1       | 50        | 0.520                             | 0.0664                                               | 0.621                                                  | 18.2                   |
| Rxn #38 | AnalytiCon Plate #7 | E1       | 50        | 0.527                             | 0.0664                                               | 0.621                                                  | 16.9                   |
| Rxn #38 | AnalytiCon Plate #7 | F1       | 50        | 0.565                             | 0.0664                                               | 0.621                                                  | 10.1                   |
| Rxn #38 | AnalytiCon Plate #7 | G1       | 50        | 0.587                             | 0.0664                                               | 0.621                                                  | 6.1                    |
| Rxn #38 | AnalytiCon Plate #7 | H1: FOC  | -         | 0.609                             | 0.0664                                               | 0.621                                                  | 2.2                    |
| Rxn #38 | AnalytiCon Plate #7 | A2: NFC  | -         | 0.086                             | 0.0664                                               | 0.621                                                  | 96.5                   |
| Rxn #38 | AnalytiCon Plate #7 | B2       | 50        | 0.636                             | 0.0664                                               | 0.621                                                  | -2.7                   |
| Rxn #38 | AnalytiCon Plate #7 | C2       | 50        | 0.613                             | 0.0664                                               | 0.621                                                  | 1.4                    |
| Rxn #38 | AnalytiCon Plate #7 | D2       | 50        | 0.597                             | 0.0664                                               | 0.621                                                  | 4.3                    |
| Rxn #38 | AnalytiCon Plate #7 | E2       | 50        | 0.570                             | 0.0664                                               | 0.621                                                  | 9.2                    |
| Rxn #38 | AnalytiCon Plate #7 | F2       | 50        | 0.623                             | 0.0664                                               | 0.621                                                  | -0.4                   |
| Rxn #38 | AnalytiCon Plate #7 | G2       | 50        | 0.597                             | 0.0664                                               | 0.621                                                  | 4.3                    |
| Rxn #38 | AnalytiCon Plate #7 | H2: FOC  | -         | 0.617                             | 0.0664                                               | 0.621                                                  | 0.7                    |
| Rxn #38 | AnalytiCon Plate #7 | A3: NFC  | -         | 0.063                             | 0.0664                                               | 0.621                                                  | 100.6                  |
| Rxn #38 | AnalytiCon Plate #7 | B3       | 50        | 0.554                             | 0.0664                                               | 0.621                                                  | 12.1                   |
| Rxn #38 | AnalytiCon Plate #7 | C3       | 50        | 0.631                             | 0.0664                                               | 0.621                                                  | -1.8                   |
| Rxn #38 | AnalytiCon Plate #7 | D3       | 50        | 0.574                             | 0.0664                                               | 0.621                                                  | 8.5                    |
| Rxn #38 | AnalytiCon Plate #7 | E3       | 50        | 0.595                             | 0.0664                                               | 0.621                                                  | 4.7                    |
| Rxn #38 | AnalytiCon Plate #7 | F3       | 50        | 0.593                             | 0.0664                                               | 0.621                                                  | 5.0                    |
| Rxn #38 | AnalytiCon Plate #7 | G3       | 50        | 0.539                             | 0.0664                                               | 0.621                                                  | 14.8                   |
| Rxn #38 | AnalytiCon Plate #7 | H3: FOC  | -         | 0.622                             | 0.0664                                               | 0.621                                                  | -0.2                   |
| Rxn #38 | AnalytiCon Plate #7 | A4: NFC  | -         | 0.059                             | 0.0664                                               | 0.621                                                  | 101.3                  |
| Rxn #38 | AnalytiCon Plate #7 | B4       | 50        | 0.608                             | 0.0664                                               | 0.621                                                  | 2.3                    |
| Rxn #38 | AnalytiCon Plate #7 | C4       | 50        | 0.568                             | 0.0664                                               | 0.621                                                  | 9.6                    |
| Rxn #38 | AnalytiCon Plate #7 | D4       | 50        | 0.540                             | 0.0664                                               | 0.621                                                  | 14.6                   |
| Rxn #38 | AnalytiCon Plate #7 | E4       | 50        | 0.581                             | 0.0664                                               | 0.621                                                  | 7.2                    |
| Rxn #38 | AnalytiCon Plate #7 | F4       | 50        | 0.607                             | 0.0664                                               | 0.621                                                  | 2.5                    |
| Rxn #38 | AnalytiCon Plate #7 | G4       | 50        | 0.581                             | 0.0664                                               | 0.621                                                  | 7.2                    |
| Rxn #38 | AnalytiCon Plate #7 | H4: FOC  | -         | 0.616                             | 0.0664                                               | 0.621                                                  | 0.9                    |
| Rxn #38 | AnalytiCon Plate #7 | A5: NFC  | -         | 0.072                             | 0.0664                                               | 0.621                                                  | 99.0                   |
| Rxn #38 | AnalytiCon Plate #7 | B5: NFC  | -         | 0.065                             | 0.0664                                               | 0.621                                                  | 100.3                  |
| Rxn #38 | AnalytiCon Plate #7 | C5: NFC  | -         | 0.076                             | 0.0664                                               | 0.621                                                  | 98.3                   |
| Rxn #38 | AnalytiCon Plate #7 | D5: NFC  | -         | 0.074                             | 0.0664                                               | 0.621                                                  | 98.6                   |
| Rxn #38 | AnalytiCon Plate #7 | E5: FOC  | -         | 0.618                             | 0.0664                                               | 0.621                                                  | 0.5                    |
| Rxn #38 | AnalytiCon Plate #7 | F5: FOC  | -         | 0.613                             | 0.0664                                               | 0.621                                                  | 1.4                    |
| Rxn #38 | AnalytiCon Plate #7 | G5: FOC  | -         | 0.625                             | 0.0664                                               | 0.621                                                  | -0.7                   |
| Rxn #38 | AnalytiCon Plate #7 | H5: FOC  | -         | 0.630                             | 0.0664                                               | 0.621                                                  | -1.6                   |
| Rxn #38 | AnalytiCon Plate #7 | A6: NFC  | -         | 0.066                             | 0.0664                                               | 0.621                                                  | 100.1                  |
| Rxn #38 | AnalytiCon Plate #7 | B6       | 50        | 0.574                             | 0.0664                                               | 0.621                                                  | 8.5                    |
| Rxn #38 | AnalytiCon Plate #7 | C6       | 50        | 0.609                             | 0.0664                                               | 0.621                                                  | 2.2                    |
| Rxn #38 | AnalytiCon Plate #7 | D6       | 50        | 0.597                             | 0.0664                                               | 0.621                                                  | 4.3                    |
| Rxn #38 | AnalytiCon Plate #7 | E6       | 50        | 0.607                             | 0.0664                                               | 0.621                                                  | 2.5                    |
| Rxn #38 | AnalytiCon Plate #7 | F6       | 50        | 0.582                             | 0.0664                                               | 0.621                                                  | 7.0                    |
| Rxn #38 | AnalytiCon Plate #7 | G6       | 50        | 0.550                             | 0.0664                                               | 0.621                                                  | 12.8                   |
| Rxn #38 | AnalytiCon Plate #7 | H6: FOC  | -         | 0.629                             | 0.0664                                               | 0.621                                                  | -1.4                   |
| Rxn #38 | AnalytiCon Plate #7 | A7: NFC  | -         | 0.069                             | 0.0664                                               | 0.621                                                  | 99.5                   |
| Rxn #38 | AnalytiCon Plate #7 | B7       | 50        | 0.626                             | 0.0664                                               | 0.621                                                  | -0.9                   |
| Rxn #38 | AnalytiCon Plate #7 | C7       | 50        | 0.573                             | 0.0664                                               | 0.621                                                  | 8.7                    |
| Rxn #38 | AnalytiCon Plate #7 | D7       | 50        | 0.542                             | 0.0664                                               | 0.621                                                  | 14.2                   |



**S3 Table. Data from Screening of Phytochemical Library for Inhibition of KHKC Activity.**

| Rxn ID  | Sample              |          |           | Sample<br>( OD <sub>340nm</sub> ) | Ave. No Fructose Controls<br>( OD <sub>340nm</sub> ) | Ave. Fructose Only Controls<br>( OD <sub>340nm</sub> ) | KHKC<br>Inhibition (%) |
|---------|---------------------|----------|-----------|-----------------------------------|------------------------------------------------------|--------------------------------------------------------|------------------------|
|         | Phytochemical Plate | Well     | Conc (µM) |                                   |                                                      |                                                        |                        |
| Rxn #38 | AnalytiCon Plate #7 | E7       | 50        | 0.553                             | 0.0664                                               | 0.621                                                  | 12.3                   |
| Rxn #38 | AnalytiCon Plate #7 | F7       | 50        | 0.550                             | 0.0664                                               | 0.621                                                  | 12.8                   |
| Rxn #38 | AnalytiCon Plate #7 | G7       | 50        | 0.582                             | 0.0664                                               | 0.621                                                  | 7.0                    |
| Rxn #38 | AnalytiCon Plate #7 | H7: FOC  | -         | 0.626                             | 0.0664                                               | 0.621                                                  | -0.9                   |
| Rxn #38 | AnalytiCon Plate #7 | A8: NFC  | -         | 0.051                             | 0.0664                                               | 0.621                                                  | 102.8                  |
| Rxn #38 | AnalytiCon Plate #7 | B8       | 50        | 0.620                             | 0.0664                                               | 0.621                                                  | 0.2                    |
| Rxn #38 | AnalytiCon Plate #7 | C8       | 50        | 0.585                             | 0.0664                                               | 0.621                                                  | 6.5                    |
| Rxn #38 | AnalytiCon Plate #7 | D8       | 50        | 0.578                             | 0.0664                                               | 0.621                                                  | 7.8                    |
| Rxn #38 | AnalytiCon Plate #7 | E8       | 50        | 0.458                             | 0.0664                                               | 0.621                                                  | 29.4                   |
| Rxn #38 | AnalytiCon Plate #7 | F8       | 50        | 0.456                             | 0.0664                                               | 0.621                                                  | 29.8                   |
| Rxn #38 | AnalytiCon Plate #7 | G8       | 50        | 0.550                             | 0.0664                                               | 0.621                                                  | 12.8                   |
| Rxn #38 | AnalytiCon Plate #7 | H8: FOC  | -         | 0.621                             | 0.0664                                               | 0.621                                                  | 0.0                    |
| Rxn #38 | AnalytiCon Plate #7 | A9: NFC  | -         | 0.066                             | 0.0664                                               | 0.621                                                  | 100.1                  |
| Rxn #38 | AnalytiCon Plate #7 | B9       | 50        | 0.591                             | 0.0664                                               | 0.621                                                  | 5.4                    |
| Rxn #38 | AnalytiCon Plate #7 | C9       | 50        | 0.580                             | 0.0664                                               | 0.621                                                  | 7.4                    |
| Rxn #38 | AnalytiCon Plate #7 | D9       | 50        | 0.560                             | 0.0664                                               | 0.621                                                  | 11.0                   |
| Rxn #38 | AnalytiCon Plate #7 | E9       | 50        | 0.578                             | 0.0664                                               | 0.621                                                  | 7.8                    |
| Rxn #38 | AnalytiCon Plate #7 | F9       | 50        | 0.581                             | 0.0664                                               | 0.621                                                  | 7.2                    |
| Rxn #38 | AnalytiCon Plate #7 | G9       | 50        | 0.585                             | 0.0664                                               | 0.621                                                  | 6.5                    |
| Rxn #38 | AnalytiCon Plate #7 | H9: FOC  | -         | 0.623                             | 0.0664                                               | 0.621                                                  | -0.4                   |
| Rxn #38 | AnalytiCon Plate #7 | A10: NFC | -         | 0.064                             | 0.0664                                               | 0.621                                                  | 100.4                  |
| Rxn #38 | AnalytiCon Plate #7 | B10      | 50        | 0.600                             | 0.0664                                               | 0.621                                                  | 3.8                    |
| Rxn #38 | AnalytiCon Plate #7 | C10      | 50        | 0.584                             | 0.0664                                               | 0.621                                                  | 6.7                    |
| Rxn #38 | AnalytiCon Plate #7 | D10      | 50        | 0.568                             | 0.0664                                               | 0.621                                                  | 9.6                    |
| Rxn #38 | AnalytiCon Plate #7 | E10      | 50        | 0.557                             | 0.0664                                               | 0.621                                                  | 11.5                   |
| Rxn #38 | AnalytiCon Plate #7 | F10      | 50        | 0.583                             | 0.0664                                               | 0.621                                                  | 6.9                    |
| Rxn #38 | AnalytiCon Plate #7 | G10      | 50        | 0.545                             | 0.0664                                               | 0.621                                                  | 13.7                   |
| Rxn #38 | AnalytiCon Plate #7 | H10: FOC | -         | 0.632                             | 0.0664                                               | 0.621                                                  | -2.0                   |
| Rxn #38 | AnalytiCon Plate #7 | A11: NFC | -         | 0.061                             | 0.0664                                               | 0.621                                                  | 101.0                  |
| Rxn #38 | AnalytiCon Plate #7 | B11      | 50        | 0.597                             | 0.0664                                               | 0.621                                                  | 4.3                    |
| Rxn #38 | AnalytiCon Plate #7 | C11      | 50        | 0.548                             | 0.0664                                               | 0.621                                                  | 13.2                   |
| Rxn #38 | AnalytiCon Plate #7 | D11      | 50        | 0.526                             | 0.0664                                               | 0.621                                                  | 17.1                   |
| Rxn #38 | AnalytiCon Plate #7 | E11      | 50        | 0.544                             | 0.0664                                               | 0.621                                                  | 13.9                   |
| Rxn #38 | AnalytiCon Plate #7 | F11      | 50        | 0.578                             | 0.0664                                               | 0.621                                                  | 7.8                    |
| Rxn #38 | AnalytiCon Plate #7 | G11      | 50        | 0.593                             | 0.0664                                               | 0.621                                                  | 5.0                    |
| Rxn #38 | AnalytiCon Plate #7 | H11: FOC | -         | 0.649                             | 0.0664                                               | 0.621                                                  | -5.0                   |
| Rxn #38 | AnalytiCon Plate #7 | A12: NFC | -         | 0.053                             | 0.0664                                               | 0.621                                                  | 102.4                  |
| Rxn #38 | AnalytiCon Plate #7 | H12: FOC | -         | 0.630                             | 0.0664                                               | 0.621                                                  | -1.6                   |
| Rxn #39 | AnalytiCon Plate #8 | A1: NFC  | -         | 0.080                             | 0.0789                                               | 0.392                                                  | 99.6                   |
| Rxn #39 | AnalytiCon Plate #8 | B1       | 50        | 0.351                             | 0.0789                                               | 0.392                                                  | 13.1                   |
| Rxn #39 | AnalytiCon Plate #8 | C1       | 50        | 0.310                             | 0.0789                                               | 0.392                                                  | 26.2                   |
| Rxn #39 | AnalytiCon Plate #8 | D1       | 50        | 0.364                             | 0.0789                                               | 0.392                                                  | 8.9                    |
| Rxn #39 | AnalytiCon Plate #8 | E1       | 50        | 0.351                             | 0.0789                                               | 0.392                                                  | 13.1                   |
| Rxn #39 | AnalytiCon Plate #8 | F1       | 50        | 0.297                             | 0.0789                                               | 0.392                                                  | 30.3                   |
| Rxn #39 | AnalytiCon Plate #8 | G1       | 50        | 0.363                             | 0.0789                                               | 0.392                                                  | 9.3                    |
| Rxn #39 | AnalytiCon Plate #8 | H1: FOC  | -         | 0.374                             | 0.0789                                               | 0.392                                                  | 5.7                    |
| Rxn #39 | AnalytiCon Plate #8 | A2: NFC  | -         | 0.080                             | 0.0789                                               | 0.392                                                  | 99.6                   |
| Rxn #39 | AnalytiCon Plate #8 | B2       | 50        | 0.389                             | 0.0789                                               | 0.392                                                  | 1.0                    |
| Rxn #39 | AnalytiCon Plate #8 | C2       | 50        | 0.338                             | 0.0789                                               | 0.392                                                  | 17.2                   |
| Rxn #39 | AnalytiCon Plate #8 | D2       | 50        | 0.360                             | 0.0789                                               | 0.392                                                  | 10.2                   |
| Rxn #39 | AnalytiCon Plate #8 | E2       | 50        | 0.386                             | 0.0789                                               | 0.392                                                  | 1.9                    |
| Rxn #39 | AnalytiCon Plate #8 | F2       | 50        | 0.378                             | 0.0789                                               | 0.392                                                  | 4.5                    |
| Rxn #39 | AnalytiCon Plate #8 | G2       | 50        | 0.386                             | 0.0789                                               | 0.392                                                  | 1.9                    |
| Rxn #39 | AnalytiCon Plate #8 | H2: FOC  | -         | 0.386                             | 0.0789                                               | 0.392                                                  | 1.9                    |
| Rxn #39 | AnalytiCon Plate #8 | A3: NFC  | -         | 0.088                             | 0.0789                                               | 0.392                                                  | 97.1                   |
| Rxn #39 | AnalytiCon Plate #8 | B3       | 50        | 0.385                             | 0.0789                                               | 0.392                                                  | 2.2                    |
| Rxn #39 | AnalytiCon Plate #8 | C3       | 50        | 0.369                             | 0.0789                                               | 0.392                                                  | 7.3                    |
| Rxn #39 | AnalytiCon Plate #8 | D3       | 50        | 0.366                             | 0.0789                                               | 0.392                                                  | 8.3                    |
| Rxn #39 | AnalytiCon Plate #8 | E3       | 50        | 0.358                             | 0.0789                                               | 0.392                                                  | 10.9                   |
| Rxn #39 | AnalytiCon Plate #8 | F3       | 50        | 0.393                             | 0.0789                                               | 0.392                                                  | -0.3                   |
| Rxn #39 | AnalytiCon Plate #8 | G3       | 50        | 0.383                             | 0.0789                                               | 0.392                                                  | 2.9                    |
| Rxn #39 | AnalytiCon Plate #8 | H3: FOC  | -         | 0.394                             | 0.0789                                               | 0.392                                                  | -0.6                   |
| Rxn #39 | AnalytiCon Plate #8 | A4: NFC  | -         | 0.075                             | 0.0789                                               | 0.392                                                  | 101.2                  |
| Rxn #39 | AnalytiCon Plate #8 | B4       | 50        | 0.371                             | 0.0789                                               | 0.392                                                  | 6.7                    |
| Rxn #39 | AnalytiCon Plate #8 | C4       | 50        | 0.387                             | 0.0789                                               | 0.392                                                  | 1.6                    |
| Rxn #39 | AnalytiCon Plate #8 | D4       | 50        | 0.390                             | 0.0789                                               | 0.392                                                  | 0.6                    |
| Rxn #39 | AnalytiCon Plate #8 | E4       | 50        | 0.370                             | 0.0789                                               | 0.392                                                  | 7.0                    |
| Rxn #39 | AnalytiCon Plate #8 | F4       | 50        | 0.391                             | 0.0789                                               | 0.392                                                  | 0.3                    |
| Rxn #39 | AnalytiCon Plate #8 | G4       | 50        | 0.389                             | 0.0789                                               | 0.392                                                  | 1.0                    |
| Rxn #39 | AnalytiCon Plate #8 | H4: FOC  | -         | 0.395                             | 0.0789                                               | 0.392                                                  | -1.0                   |
| Rxn #39 | AnalytiCon Plate #8 | A5: NFC  | -         | 0.088                             | 0.0789                                               | 0.392                                                  | 97.1                   |
| Rxn #39 | AnalytiCon Plate #8 | B5: NFC  | -         | 0.071                             | 0.0789                                               | 0.392                                                  | 102.5                  |
| Rxn #39 | AnalytiCon Plate #8 | C5: NFC  | -         | 0.052                             | 0.0789                                               | 0.392                                                  | 108.6                  |
| Rxn #39 | AnalytiCon Plate #8 | D5: NFC  | -         | 0.065                             | 0.0789                                               | 0.392                                                  | 104.4                  |

**S3 Table. Data from Screening of Phytochemical Library for Inhibition of KHKC Activity.**

| Rxn ID  | Sample              |          |           | Sample<br>( OD <sub>340nm</sub> ) | Ave. No Fructose Controls<br>( OD <sub>340nm</sub> ) | Ave. Fructose Only Controls<br>( OD <sub>340nm</sub> ) | KHKC<br>Inhibition (%) |
|---------|---------------------|----------|-----------|-----------------------------------|------------------------------------------------------|--------------------------------------------------------|------------------------|
|         | Phytochemical Plate | Well     | Conc (µM) |                                   |                                                      |                                                        |                        |
| Rxn #39 | AnalytiCon Plate #8 | E5: FOC  | -         | 0.384                             | 0.0789                                               | 0.392                                                  | 2.6                    |
| Rxn #39 | AnalytiCon Plate #8 | F5: FOC  | -         | 0.405                             | 0.0789                                               | 0.392                                                  | -4.2                   |
| Rxn #39 | AnalytiCon Plate #8 | G5: FOC  | -         | 0.395                             | 0.0789                                               | 0.392                                                  | -1.0                   |
| Rxn #39 | AnalytiCon Plate #8 | H5: FOC  | -         | 0.395                             | 0.0789                                               | 0.392                                                  | -1.0                   |
| Rxn #39 | AnalytiCon Plate #8 | A6: NFC  | -         | 0.071                             | 0.0789                                               | 0.392                                                  | 102.5                  |
| Rxn #39 | AnalytiCon Plate #8 | B6       | 50        | 0.359                             | 0.0789                                               | 0.392                                                  | 10.5                   |
| Rxn #39 | AnalytiCon Plate #8 | C6       | 50        | 0.386                             | 0.0789                                               | 0.392                                                  | 1.9                    |
| Rxn #39 | AnalytiCon Plate #8 | D6       | 50        | 0.395                             | 0.0789                                               | 0.392                                                  | -1.0                   |
| Rxn #39 | AnalytiCon Plate #8 | E6       | 50        | 0.362                             | 0.0789                                               | 0.392                                                  | 9.6                    |
| Rxn #39 | AnalytiCon Plate #8 | F6       | 50        | 0.390                             | 0.0789                                               | 0.392                                                  | 0.6                    |
| Rxn #39 | AnalytiCon Plate #8 | G6       | 50        | 0.393                             | 0.0789                                               | 0.392                                                  | -0.3                   |
| Rxn #39 | AnalytiCon Plate #8 | H6: FOC  | -         | 0.403                             | 0.0789                                               | 0.392                                                  | -3.5                   |
| Rxn #39 | AnalytiCon Plate #8 | A7: NFC  | -         | 0.075                             | 0.0789                                               | 0.392                                                  | 101.2                  |
| Rxn #39 | AnalytiCon Plate #8 | B7       | 50        | 0.359                             | 0.0789                                               | 0.392                                                  | 10.5                   |
| Rxn #39 | AnalytiCon Plate #8 | C7       | 50        | 0.387                             | 0.0789                                               | 0.392                                                  | 1.6                    |
| Rxn #39 | AnalytiCon Plate #8 | D7       | 50        | 0.380                             | 0.0789                                               | 0.392                                                  | 3.8                    |
| Rxn #39 | AnalytiCon Plate #8 | E7       | 50        | 0.389                             | 0.0789                                               | 0.392                                                  | 1.0                    |
| Rxn #39 | AnalytiCon Plate #8 | F7       | 50        | 0.346                             | 0.0789                                               | 0.392                                                  | 14.7                   |
| Rxn #39 | AnalytiCon Plate #8 | G7       | 50        | 0.339                             | 0.0789                                               | 0.392                                                  | 16.9                   |
| Rxn #39 | AnalytiCon Plate #8 | H7: FOC  | -         | 0.392                             | 0.0789                                               | 0.392                                                  | 0.0                    |
| Rxn #39 | AnalytiCon Plate #8 | A8: NFC  | -         | 0.082                             | 0.0789                                               | 0.392                                                  | 99.0                   |
| Rxn #39 | AnalytiCon Plate #8 | B8       | 50        | 0.350                             | 0.0789                                               | 0.392                                                  | 13.4                   |
| Rxn #39 | AnalytiCon Plate #8 | C8       | 50        | 0.393                             | 0.0789                                               | 0.392                                                  | -0.3                   |
| Rxn #39 | AnalytiCon Plate #8 | D8       | 50        | 0.384                             | 0.0789                                               | 0.392                                                  | 2.6                    |
| Rxn #39 | AnalytiCon Plate #8 | E8       | 50        | 0.386                             | 0.0789                                               | 0.392                                                  | 1.9                    |
| Rxn #39 | AnalytiCon Plate #8 | F8       | 50        | 0.389                             | 0.0789                                               | 0.392                                                  | 1.0                    |
| Rxn #39 | AnalytiCon Plate #8 | G8       | 50        | 0.354                             | 0.0789                                               | 0.392                                                  | 12.1                   |
| Rxn #39 | AnalytiCon Plate #8 | H8: FOC  | -         | 0.408                             | 0.0789                                               | 0.392                                                  | -5.1                   |
| Rxn #39 | AnalytiCon Plate #8 | A9: NFC  | -         | 0.090                             | 0.0789                                               | 0.392                                                  | 96.5                   |
| Rxn #39 | AnalytiCon Plate #8 | B9       | 50        | 0.371                             | 0.0789                                               | 0.392                                                  | 6.7                    |
| Rxn #39 | AnalytiCon Plate #8 | C9       | 50        | 0.349                             | 0.0789                                               | 0.392                                                  | 13.7                   |
| Rxn #39 | AnalytiCon Plate #8 | D9       | 50        | 0.400                             | 0.0789                                               | 0.392                                                  | -2.6                   |
| Rxn #39 | AnalytiCon Plate #8 | E9       | 50        | 0.357                             | 0.0789                                               | 0.392                                                  | 11.2                   |
| Rxn #39 | AnalytiCon Plate #8 | F9       | 50        | 0.377                             | 0.0789                                               | 0.392                                                  | 4.8                    |
| Rxn #39 | AnalytiCon Plate #8 | G9       | 50        | 0.383                             | 0.0789                                               | 0.392                                                  | 2.9                    |
| Rxn #39 | AnalytiCon Plate #8 | H9: FOC  | -         | 0.398                             | 0.0789                                               | 0.392                                                  | -1.9                   |
| Rxn #39 | AnalytiCon Plate #8 | A10: NFC | -         | 0.094                             | 0.0789                                               | 0.392                                                  | 95.2                   |
| Rxn #39 | AnalytiCon Plate #8 | B10      | 50        | 0.400                             | 0.0789                                               | 0.392                                                  | -2.6                   |
| Rxn #39 | AnalytiCon Plate #8 | C10      | 50        | 0.382                             | 0.0789                                               | 0.392                                                  | 3.2                    |
| Rxn #39 | AnalytiCon Plate #8 | D10      | 50        | 0.392                             | 0.0789                                               | 0.392                                                  | 0.0                    |
| Rxn #39 | AnalytiCon Plate #8 | E10      | 50        | 0.356                             | 0.0789                                               | 0.392                                                  | 11.5                   |
| Rxn #39 | AnalytiCon Plate #8 | F10      | 50        | 0.324                             | 0.0789                                               | 0.392                                                  | 21.7                   |
| Rxn #39 | AnalytiCon Plate #8 | G10      | 50        | 0.332                             | 0.0789                                               | 0.392                                                  | 19.2                   |
| Rxn #39 | AnalytiCon Plate #8 | H10: FOC | -         | 0.409                             | 0.0789                                               | 0.392                                                  | -5.4                   |
| Rxn #39 | AnalytiCon Plate #8 | A11: NFC | -         | 0.084                             | 0.0789                                               | 0.392                                                  | 98.4                   |
| Rxn #39 | AnalytiCon Plate #8 | B11      | 50        | 0.334                             | 0.0789                                               | 0.392                                                  | 18.5                   |
| Rxn #39 | AnalytiCon Plate #8 | C11      | 50        | 0.344                             | 0.0789                                               | 0.392                                                  | 15.3                   |
| Rxn #39 | AnalytiCon Plate #8 | D11      | 50        | 0.309                             | 0.0789                                               | 0.392                                                  | 26.5                   |
| Rxn #39 | AnalytiCon Plate #8 | E11      | 50        | 0.388                             | 0.0789                                               | 0.392                                                  | 1.3                    |
| Rxn #39 | AnalytiCon Plate #8 | F11      | 50        | 0.381                             | 0.0789                                               | 0.392                                                  | 3.5                    |
| Rxn #39 | AnalytiCon Plate #8 | G11      | 50        | 0.395                             | 0.0789                                               | 0.392                                                  | -1.0                   |
| Rxn #39 | AnalytiCon Plate #8 | H11: FOC | -         | 0.409                             | 0.0789                                               | 0.392                                                  | -5.4                   |
| Rxn #39 | AnalytiCon Plate #8 | A12: NFC | -         | 0.089                             | 0.0789                                               | 0.392                                                  | 96.8                   |
| Rxn #39 | AnalytiCon Plate #8 | H12: FOC | -         | 0.409                             | 0.0789                                               | 0.392                                                  | -5.4                   |
| Rxn #40 | AnalytiCon Plate #9 | A1: NFC  | -         | 0.058                             | 0.0629                                               | 0.483                                                  | 101.2                  |
| Rxn #40 | AnalytiCon Plate #9 | B1       | 50        | 0.448                             | 0.0629                                               | 0.483                                                  | 8.3                    |
| Rxn #40 | AnalytiCon Plate #9 | C1       | 50        | 0.445                             | 0.0629                                               | 0.483                                                  | 9.0                    |
| Rxn #40 | AnalytiCon Plate #9 | D1       | 50        | 0.413                             | 0.0629                                               | 0.483                                                  | 16.7                   |
| Rxn #40 | AnalytiCon Plate #9 | E1       | 50        | 0.433                             | 0.0629                                               | 0.483                                                  | 11.9                   |
| Rxn #40 | AnalytiCon Plate #9 | F1       | 50        | 0.440                             | 0.0629                                               | 0.483                                                  | 10.2                   |
| Rxn #40 | AnalytiCon Plate #9 | G1       | 50        | 0.434                             | 0.0629                                               | 0.483                                                  | 11.7                   |
| Rxn #40 | AnalytiCon Plate #9 | H1: FOC  | -         | 0.457                             | 0.0629                                               | 0.483                                                  | 6.2                    |
| Rxn #40 | AnalytiCon Plate #9 | A2: NFC  | -         | 0.062                             | 0.0629                                               | 0.483                                                  | 100.2                  |
| Rxn #40 | AnalytiCon Plate #9 | B2       | 50        | 0.453                             | 0.0629                                               | 0.483                                                  | 7.1                    |
| Rxn #40 | AnalytiCon Plate #9 | C2       | 50        | 0.420                             | 0.0629                                               | 0.483                                                  | 15.0                   |
| Rxn #40 | AnalytiCon Plate #9 | D2       | 50        | 0.430                             | 0.0629                                               | 0.483                                                  | 12.6                   |
| Rxn #40 | AnalytiCon Plate #9 | E2       | 50        | 0.401                             | 0.0629                                               | 0.483                                                  | 19.5                   |
| Rxn #40 | AnalytiCon Plate #9 | F2       | 50        | 0.443                             | 0.0629                                               | 0.483                                                  | 9.5                    |
| Rxn #40 | AnalytiCon Plate #9 | G2       | 50        | 0.452                             | 0.0629                                               | 0.483                                                  | 7.4                    |
| Rxn #40 | AnalytiCon Plate #9 | H2: FOC  | -         | 0.482                             | 0.0629                                               | 0.483                                                  | 0.2                    |
| Rxn #40 | AnalytiCon Plate #9 | A3: NFC  | -         | 0.062                             | 0.0629                                               | 0.483                                                  | 100.2                  |
| Rxn #40 | AnalytiCon Plate #9 | B3       | 50        | 0.347                             | 0.0629                                               | 0.483                                                  | 32.4                   |
| Rxn #40 | AnalytiCon Plate #9 | C3       | 50        | 0.467                             | 0.0629                                               | 0.483                                                  | 3.8                    |
| Rxn #40 | AnalytiCon Plate #9 | D3       | 50        | 0.379                             | 0.0629                                               | 0.483                                                  | 24.8                   |

**S3 Table. Data from Screening of Phytochemical Library for Inhibition of KHKC Activity.**

| Rxn ID  | Sample               |          |           | Sample<br>( OD <sub>340nm</sub> ) | Ave. No Fructose Controls<br>( OD <sub>340nm</sub> ) | Ave. Fructose Only Controls<br>( OD <sub>340nm</sub> ) | KHKC<br>Inhibition (%) |
|---------|----------------------|----------|-----------|-----------------------------------|------------------------------------------------------|--------------------------------------------------------|------------------------|
|         | Phytochemical Plate  | Well     | Conc (µM) |                                   |                                                      |                                                        |                        |
| Rxn #40 | AnalytiCon Plate #9  | E3       | 50        | 0.461                             | 0.0629                                               | 0.483                                                  | 5.2                    |
| Rxn #40 | AnalytiCon Plate #9  | F3       | 50        | 0.458                             | 0.0629                                               | 0.483                                                  | 6.0                    |
| Rxn #40 | AnalytiCon Plate #9  | G3       | 50        | 0.451                             | 0.0629                                               | 0.483                                                  | 7.6                    |
| Rxn #40 | AnalytiCon Plate #9  | H3: FOC  | -         | 0.479                             | 0.0629                                               | 0.483                                                  | 1.0                    |
| Rxn #40 | AnalytiCon Plate #9  | A4: NFC  | -         | 0.059                             | 0.0629                                               | 0.483                                                  | 100.9                  |
| Rxn #40 | AnalytiCon Plate #9  | B4       | 50        | 0.461                             | 0.0629                                               | 0.483                                                  | 5.2                    |
| Rxn #40 | AnalytiCon Plate #9  | C4       | 50        | 0.466                             | 0.0629                                               | 0.483                                                  | 4.0                    |
| Rxn #40 | AnalytiCon Plate #9  | D4       | 50        | 0.476                             | 0.0629                                               | 0.483                                                  | 1.7                    |
| Rxn #40 | AnalytiCon Plate #9  | E4       | 50        | 0.470                             | 0.0629                                               | 0.483                                                  | 3.1                    |
| Rxn #40 | AnalytiCon Plate #9  | F4       | 50        | 0.375                             | 0.0629                                               | 0.483                                                  | 25.7                   |
| Rxn #40 | AnalytiCon Plate #9  | G4       | 50        | 0.453                             | 0.0629                                               | 0.483                                                  | 7.1                    |
| Rxn #40 | AnalytiCon Plate #9  | H4: FOC  | -         | 0.483                             | 0.0629                                               | 0.483                                                  | 0.0                    |
| Rxn #40 | AnalytiCon Plate #9  | A5: NFC  | -         | 0.063                             | 0.0629                                               | 0.483                                                  | 100.0                  |
| Rxn #40 | AnalytiCon Plate #9  | B5: NFC  | -         | 0.057                             | 0.0629                                               | 0.483                                                  | 101.4                  |
| Rxn #40 | AnalytiCon Plate #9  | C5: NFC  | -         | 0.055                             | 0.0629                                               | 0.483                                                  | 101.9                  |
| Rxn #40 | AnalytiCon Plate #9  | D5: NFC  | -         | 0.055                             | 0.0629                                               | 0.483                                                  | 101.9                  |
| Rxn #40 | AnalytiCon Plate #9  | E5: FOC  | -         | 0.483                             | 0.0629                                               | 0.483                                                  | 0.0                    |
| Rxn #40 | AnalytiCon Plate #9  | F5: FOC  | -         | 0.482                             | 0.0629                                               | 0.483                                                  | 0.2                    |
| Rxn #40 | AnalytiCon Plate #9  | G5: FOC  | -         | 0.478                             | 0.0629                                               | 0.483                                                  | 1.2                    |
| Rxn #40 | AnalytiCon Plate #9  | H5: FOC  | -         | 0.500                             | 0.0629                                               | 0.483                                                  | -4.0                   |
| Rxn #40 | AnalytiCon Plate #9  | A6: NFC  | -         | 0.065                             | 0.0629                                               | 0.483                                                  | 99.5                   |
| Rxn #40 | AnalytiCon Plate #9  | B6       | 50        | 0.485                             | 0.0629                                               | 0.483                                                  | -0.5                   |
| Rxn #40 | AnalytiCon Plate #9  | C6       | 50        | 0.478                             | 0.0629                                               | 0.483                                                  | 1.2                    |
| Rxn #40 | AnalytiCon Plate #9  | D6       | 50        | 0.483                             | 0.0629                                               | 0.483                                                  | 0.0                    |
| Rxn #40 | AnalytiCon Plate #9  | E6       | 50        | 0.465                             | 0.0629                                               | 0.483                                                  | 4.3                    |
| Rxn #40 | AnalytiCon Plate #9  | F6       | 50        | 0.449                             | 0.0629                                               | 0.483                                                  | 8.1                    |
| Rxn #40 | AnalytiCon Plate #9  | G6       | 50        | 0.460                             | 0.0629                                               | 0.483                                                  | 5.5                    |
| Rxn #40 | AnalytiCon Plate #9  | H6: FOC  | -         | 0.488                             | 0.0629                                               | 0.483                                                  | -1.2                   |
| Rxn #40 | AnalytiCon Plate #9  | A7: NFC  | -         | 0.064                             | 0.0629                                               | 0.483                                                  | 99.7                   |
| Rxn #40 | AnalytiCon Plate #9  | B7       | 50        | 0.485                             | 0.0629                                               | 0.483                                                  | -0.5                   |
| Rxn #40 | AnalytiCon Plate #9  | C7       | 50        | 0.413                             | 0.0629                                               | 0.483                                                  | 16.7                   |
| Rxn #40 | AnalytiCon Plate #9  | D7       | 50        | 0.460                             | 0.0629                                               | 0.483                                                  | 5.5                    |
| Rxn #40 | AnalytiCon Plate #9  | E7       | 50        | 0.383                             | 0.0629                                               | 0.483                                                  | 23.8                   |
| Rxn #40 | AnalytiCon Plate #9  | F7       | 50        | 0.457                             | 0.0629                                               | 0.483                                                  | 6.2                    |
| Rxn #40 | AnalytiCon Plate #9  | G7       | 50        | 0.468                             | 0.0629                                               | 0.483                                                  | 3.6                    |
| Rxn #40 | AnalytiCon Plate #9  | H7: FOC  | -         | 0.495                             | 0.0629                                               | 0.483                                                  | -2.9                   |
| Rxn #40 | AnalytiCon Plate #9  | A8: NFC  | -         | 0.071                             | 0.0629                                               | 0.483                                                  | 98.1                   |
| Rxn #40 | AnalytiCon Plate #9  | B8       | 50        | 0.493                             | 0.0629                                               | 0.483                                                  | -2.4                   |
| Rxn #40 | AnalytiCon Plate #9  | C8       | 50        | 0.437                             | 0.0629                                               | 0.483                                                  | 10.9                   |
| Rxn #40 | AnalytiCon Plate #9  | D8       | 50        | 0.484                             | 0.0629                                               | 0.483                                                  | -0.2                   |
| Rxn #40 | AnalytiCon Plate #9  | E8       | 50        | 0.453                             | 0.0629                                               | 0.483                                                  | 7.1                    |
| Rxn #40 | AnalytiCon Plate #9  | F8       | 50        | 0.469                             | 0.0629                                               | 0.483                                                  | 3.3                    |
| Rxn #40 | AnalytiCon Plate #9  | G8       | 50        | 0.381                             | 0.0629                                               | 0.483                                                  | 24.3                   |
| Rxn #40 | AnalytiCon Plate #9  | H8: FOC  | -         | 0.491                             | 0.0629                                               | 0.483                                                  | -1.9                   |
| Rxn #40 | AnalytiCon Plate #9  | A9: NFC  | -         | 0.064                             | 0.0629                                               | 0.483                                                  | 99.7                   |
| Rxn #40 | AnalytiCon Plate #9  | B9       | 50        | 0.491                             | 0.0629                                               | 0.483                                                  | -1.9                   |
| Rxn #40 | AnalytiCon Plate #9  | C9       | 50        | 0.464                             | 0.0629                                               | 0.483                                                  | 4.5                    |
| Rxn #40 | AnalytiCon Plate #9  | D9       | 50        | 0.410                             | 0.0629                                               | 0.483                                                  | 17.4                   |
| Rxn #40 | AnalytiCon Plate #9  | E9       | 50        | 0.492                             | 0.0629                                               | 0.483                                                  | -2.1                   |
| Rxn #40 | AnalytiCon Plate #9  | F9       | 50        | 0.477                             | 0.0629                                               | 0.483                                                  | 1.4                    |
| Rxn #40 | AnalytiCon Plate #9  | G9       | 50        | 0.446                             | 0.0629                                               | 0.483                                                  | 8.8                    |
| Rxn #40 | AnalytiCon Plate #9  | H9: FOC  | -         | 0.511                             | 0.0629                                               | 0.483                                                  | -6.7                   |
| Rxn #40 | AnalytiCon Plate #9  | A10: NFC | -         | 0.067                             | 0.0629                                               | 0.483                                                  | 99.0                   |
| Rxn #40 | AnalytiCon Plate #9  | B10      | 50        | 0.484                             | 0.0629                                               | 0.483                                                  | -0.2                   |
| Rxn #40 | AnalytiCon Plate #9  | C10      | 50        | 0.475                             | 0.0629                                               | 0.483                                                  | 1.9                    |
| Rxn #40 | AnalytiCon Plate #9  | D10      | 50        | 0.513                             | 0.0629                                               | 0.483                                                  | -7.1                   |
| Rxn #40 | AnalytiCon Plate #9  | E10      | 50        | 0.477                             | 0.0629                                               | 0.483                                                  | 1.4                    |
| Rxn #40 | AnalytiCon Plate #9  | F10      | 50        | 0.466                             | 0.0629                                               | 0.483                                                  | 4.0                    |
| Rxn #40 | AnalytiCon Plate #9  | G10      | 50        | 0.481                             | 0.0629                                               | 0.483                                                  | 0.5                    |
| Rxn #40 | AnalytiCon Plate #9  | H10: FOC | -         | 0.507                             | 0.0629                                               | 0.483                                                  | -5.7                   |
| Rxn #40 | AnalytiCon Plate #9  | A11: NFC | -         | 0.068                             | 0.0629                                               | 0.483                                                  | 98.8                   |
| Rxn #40 | AnalytiCon Plate #9  | B11      | 50        | 0.483                             | 0.0629                                               | 0.483                                                  | 0.0                    |
| Rxn #40 | AnalytiCon Plate #9  | C11      | 50        | 0.515                             | 0.0629                                               | 0.483                                                  | -7.6                   |
| Rxn #40 | AnalytiCon Plate #9  | D11      | 50        | 0.508                             | 0.0629                                               | 0.483                                                  | -6.0                   |
| Rxn #40 | AnalytiCon Plate #9  | E11      | 50        | 0.506                             | 0.0629                                               | 0.483                                                  | -5.5                   |
| Rxn #40 | AnalytiCon Plate #9  | F11      | 50        | 0.492                             | 0.0629                                               | 0.483                                                  | -2.1                   |
| Rxn #40 | AnalytiCon Plate #9  | G11      | 50        | 0.505                             | 0.0629                                               | 0.483                                                  | -5.2                   |
| Rxn #40 | AnalytiCon Plate #9  | H11: FOC | -         | 0.507                             | 0.0629                                               | 0.483                                                  | -5.7                   |
| Rxn #40 | AnalytiCon Plate #9  | A12: NFC | -         | 0.073                             | 0.0629                                               | 0.483                                                  | 97.6                   |
| Rxn #40 | AnalytiCon Plate #9  | H12: FOC | -         | 0.521                             | 0.0629                                               | 0.483                                                  | -9.0                   |
| Rxn #41 | AnalytiCon Plate #10 | A1: NFC  | -         | 0.075                             | 0.0787                                               | 0.601                                                  | 100.7                  |
| Rxn #41 | AnalytiCon Plate #10 | B1       | 50        | 0.572                             | 0.0787                                               | 0.601                                                  | 5.6                    |
| Rxn #41 | AnalytiCon Plate #10 | C1       | 50        | 0.487                             | 0.0787                                               | 0.601                                                  | 21.8                   |
| Rxn #41 | AnalytiCon Plate #10 | D1       | 50        | 0.574                             | 0.0787                                               | 0.601                                                  | 5.2                    |

**S3 Table. Data from Screening of Phytochemical Library for Inhibition of KHKC Activity.**

| Rxn ID  | Sample               |          |           | Sample<br>( OD <sub>340nm</sub> ) | Ave. No Fructose Controls<br>( OD <sub>340nm</sub> ) | Ave. Fructose Only Controls<br>( OD <sub>340nm</sub> ) | KHKC<br>Inhibition (%) |
|---------|----------------------|----------|-----------|-----------------------------------|------------------------------------------------------|--------------------------------------------------------|------------------------|
|         | Phytochemical Plate  | Well     | Conc (µM) |                                   |                                                      |                                                        |                        |
| Rxn #41 | AnalytiCon Plate #10 | E1       | 50        | 0.525                             | 0.0787                                               | 0.601                                                  | 14.6                   |
| Rxn #41 | AnalytiCon Plate #10 | F1       | 50        | 0.523                             | 0.0787                                               | 0.601                                                  | 14.9                   |
| Rxn #41 | AnalytiCon Plate #10 | G1       | 50        | 0.552                             | 0.0787                                               | 0.601                                                  | 9.4                    |
| Rxn #41 | AnalytiCon Plate #10 | H1: FOC  | -         | 0.571                             | 0.0787                                               | 0.601                                                  | 5.7                    |
| Rxn #41 | AnalytiCon Plate #10 | A2: NFC  | -         | 0.081                             | 0.0787                                               | 0.601                                                  | 99.6                   |
| Rxn #41 | AnalytiCon Plate #10 | B2       | 50        | 0.603                             | 0.0787                                               | 0.601                                                  | -0.4                   |
| Rxn #41 | AnalytiCon Plate #10 | C2       | 50        | 0.596                             | 0.0787                                               | 0.601                                                  | 1.0                    |
| Rxn #41 | AnalytiCon Plate #10 | D2       | 50        | 0.595                             | 0.0787                                               | 0.601                                                  | 1.1                    |
| Rxn #41 | AnalytiCon Plate #10 | E2       | 50        | 0.587                             | 0.0787                                               | 0.601                                                  | 2.7                    |
| Rxn #41 | AnalytiCon Plate #10 | F2       | 50        | 0.586                             | 0.0787                                               | 0.601                                                  | 2.9                    |
| Rxn #41 | AnalytiCon Plate #10 | G2       | 50        | 0.565                             | 0.0787                                               | 0.601                                                  | 6.9                    |
| Rxn #41 | AnalytiCon Plate #10 | H2: FOC  | -         | 0.600                             | 0.0787                                               | 0.601                                                  | 0.2                    |
| Rxn #41 | AnalytiCon Plate #10 | A3: NFC  | -         | 0.082                             | 0.0787                                               | 0.601                                                  | 99.4                   |
| Rxn #41 | AnalytiCon Plate #10 | B3       | 50        | 0.641                             | 0.0787                                               | 0.601                                                  | -7.7                   |
| Rxn #41 | AnalytiCon Plate #10 | C3       | 50        | 0.633                             | 0.0787                                               | 0.601                                                  | -6.1                   |
| Rxn #41 | AnalytiCon Plate #10 | D3       | 50        | 0.585                             | 0.0787                                               | 0.601                                                  | 3.1                    |
| Rxn #41 | AnalytiCon Plate #10 | E3       | 50        | 0.560                             | 0.0787                                               | 0.601                                                  | 7.8                    |
| Rxn #41 | AnalytiCon Plate #10 | F3       | 50        | 0.568                             | 0.0787                                               | 0.601                                                  | 6.3                    |
| Rxn #41 | AnalytiCon Plate #10 | G3       | 50        | 0.567                             | 0.0787                                               | 0.601                                                  | 6.5                    |
| Rxn #41 | AnalytiCon Plate #10 | H3: FOC  | -         | 0.602                             | 0.0787                                               | 0.601                                                  | -0.2                   |
| Rxn #41 | AnalytiCon Plate #10 | A4: NFC  | -         | 0.083                             | 0.0787                                               | 0.601                                                  | 99.2                   |
| Rxn #41 | AnalytiCon Plate #10 | B4       | 50        | 0.600                             | 0.0787                                               | 0.601                                                  | 0.2                    |
| Rxn #41 | AnalytiCon Plate #10 | C4       | 50        | 0.611                             | 0.0787                                               | 0.601                                                  | -1.9                   |
| Rxn #41 | AnalytiCon Plate #10 | D4       | 50        | 0.592                             | 0.0787                                               | 0.601                                                  | 1.7                    |
| Rxn #41 | AnalytiCon Plate #10 | E4       | 50        | 0.565                             | 0.0787                                               | 0.601                                                  | 6.9                    |
| Rxn #41 | AnalytiCon Plate #10 | F4       | 50        | 0.452                             | 0.0787                                               | 0.601                                                  | 28.5                   |
| Rxn #41 | AnalytiCon Plate #10 | G4       | 50        | 0.537                             | 0.0787                                               | 0.601                                                  | 12.3                   |
| Rxn #41 | AnalytiCon Plate #10 | H4: FOC  | -         | 0.603                             | 0.0787                                               | 0.601                                                  | -0.4                   |
| Rxn #41 | AnalytiCon Plate #10 | A5: NFC  | -         | 0.077                             | 0.0787                                               | 0.601                                                  | 100.3                  |
| Rxn #41 | AnalytiCon Plate #10 | B5: NFC  | -         | 0.076                             | 0.0787                                               | 0.601                                                  | 100.5                  |
| Rxn #41 | AnalytiCon Plate #10 | C5: NFC  | -         | 0.072                             | 0.0787                                               | 0.601                                                  | 101.3                  |
| Rxn #41 | AnalytiCon Plate #10 | D5: NFC  | -         | 0.072                             | 0.0787                                               | 0.601                                                  | 101.3                  |
| Rxn #41 | AnalytiCon Plate #10 | E5: FOC  | -         | 0.592                             | 0.0787                                               | 0.601                                                  | 1.7                    |
| Rxn #41 | AnalytiCon Plate #10 | F5: FOC  | -         | 0.605                             | 0.0787                                               | 0.601                                                  | -0.8                   |
| Rxn #41 | AnalytiCon Plate #10 | G5: FOC  | -         | 0.596                             | 0.0787                                               | 0.601                                                  | 1.0                    |
| Rxn #41 | AnalytiCon Plate #10 | H5: FOC  | -         | 0.614                             | 0.0787                                               | 0.601                                                  | -2.5                   |
| Rxn #41 | AnalytiCon Plate #10 | A6: NFC  | -         | 0.081                             | 0.0787                                               | 0.601                                                  | 99.6                   |
| Rxn #41 | AnalytiCon Plate #10 | B6       | 50        | 0.584                             | 0.0787                                               | 0.601                                                  | 3.3                    |
| Rxn #41 | AnalytiCon Plate #10 | C6       | 50        | 0.595                             | 0.0787                                               | 0.601                                                  | 1.1                    |
| Rxn #41 | AnalytiCon Plate #10 | D6       | 50        | 0.626                             | 0.0787                                               | 0.601                                                  | -4.8                   |
| Rxn #41 | AnalytiCon Plate #10 | E6       | 50        | 0.560                             | 0.0787                                               | 0.601                                                  | 7.8                    |
| Rxn #41 | AnalytiCon Plate #10 | F6       | 50        | 0.594                             | 0.0787                                               | 0.601                                                  | 1.3                    |
| Rxn #41 | AnalytiCon Plate #10 | G6       | 50        | 0.586                             | 0.0787                                               | 0.601                                                  | 2.9                    |
| Rxn #41 | AnalytiCon Plate #10 | H6: FOC  | -         | 0.614                             | 0.0787                                               | 0.601                                                  | -2.5                   |
| Rxn #41 | AnalytiCon Plate #10 | A7: NFC  | -         | 0.081                             | 0.0787                                               | 0.601                                                  | 99.6                   |
| Rxn #41 | AnalytiCon Plate #10 | B7       | 50        | 0.605                             | 0.0787                                               | 0.601                                                  | -0.8                   |
| Rxn #41 | AnalytiCon Plate #10 | C7       | 50        | 0.612                             | 0.0787                                               | 0.601                                                  | -2.1                   |
| Rxn #41 | AnalytiCon Plate #10 | D7       | 50        | 0.512                             | 0.0787                                               | 0.601                                                  | 17.0                   |
| Rxn #41 | AnalytiCon Plate #10 | E7       | 50        | 0.550                             | 0.0787                                               | 0.601                                                  | 9.8                    |
| Rxn #41 | AnalytiCon Plate #10 | F7       | 50        | 0.576                             | 0.0787                                               | 0.601                                                  | 4.8                    |
| Rxn #41 | AnalytiCon Plate #10 | G7       | 50        | 0.599                             | 0.0787                                               | 0.601                                                  | 0.4                    |
| Rxn #41 | AnalytiCon Plate #10 | H7: FOC  | -         | 0.609                             | 0.0787                                               | 0.601                                                  | -1.5                   |
| Rxn #41 | AnalytiCon Plate #10 | A8: NFC  | -         | 0.075                             | 0.0787                                               | 0.601                                                  | 100.7                  |
| Rxn #41 | AnalytiCon Plate #10 | B8       | 50        | 0.534                             | 0.0787                                               | 0.601                                                  | 12.8                   |
| Rxn #41 | AnalytiCon Plate #10 | C8       | 50        | 0.539                             | 0.0787                                               | 0.601                                                  | 11.9                   |
| Rxn #41 | AnalytiCon Plate #10 | D8       | 50        | 0.583                             | 0.0787                                               | 0.601                                                  | 3.4                    |
| Rxn #41 | AnalytiCon Plate #10 | E8       | 50        | 0.583                             | 0.0787                                               | 0.601                                                  | 3.4                    |
| Rxn #41 | AnalytiCon Plate #10 | F8       | 50        | 0.597                             | 0.0787                                               | 0.601                                                  | 0.8                    |
| Rxn #41 | AnalytiCon Plate #10 | G8       | 50        | 0.594                             | 0.0787                                               | 0.601                                                  | 1.3                    |
| Rxn #41 | AnalytiCon Plate #10 | H8: FOC  | -         | 0.613                             | 0.0787                                               | 0.601                                                  | -2.3                   |
| Rxn #41 | AnalytiCon Plate #10 | A9: NFC  | -         | 0.078                             | 0.0787                                               | 0.601                                                  | 100.1                  |
| Rxn #41 | AnalytiCon Plate #10 | B9       | 50        | 0.572                             | 0.0787                                               | 0.601                                                  | 5.6                    |
| Rxn #41 | AnalytiCon Plate #10 | C9       | 50        | 0.461                             | 0.0787                                               | 0.601                                                  | 26.8                   |
| Rxn #41 | AnalytiCon Plate #10 | D9       | 50        | 0.572                             | 0.0787                                               | 0.601                                                  | 5.6                    |
| Rxn #41 | AnalytiCon Plate #10 | E9       | 50        | 0.583                             | 0.0787                                               | 0.601                                                  | 3.4                    |
| Rxn #41 | AnalytiCon Plate #10 | F9       | 50        | 0.576                             | 0.0787                                               | 0.601                                                  | 4.8                    |
| Rxn #41 | AnalytiCon Plate #10 | G9       | 50        | 0.578                             | 0.0787                                               | 0.601                                                  | 4.4                    |
| Rxn #41 | AnalytiCon Plate #10 | H9: FOC  | -         | 0.603                             | 0.0787                                               | 0.601                                                  | -0.4                   |
| Rxn #41 | AnalytiCon Plate #10 | A10: NFC | -         | 0.080                             | 0.0787                                               | 0.601                                                  | 99.8                   |
| Rxn #41 | AnalytiCon Plate #10 | B10      | 50        | 0.567                             | 0.0787                                               | 0.601                                                  | 6.5                    |
| Rxn #41 | AnalytiCon Plate #10 | C10      | 50        | 0.519                             | 0.0787                                               | 0.601                                                  | 15.7                   |
| Rxn #41 | AnalytiCon Plate #10 | D10      | 50        | 0.579                             | 0.0787                                               | 0.601                                                  | 4.2                    |
| Rxn #41 | AnalytiCon Plate #10 | E10      | 50        | 0.570                             | 0.0787                                               | 0.601                                                  | 5.9                    |
| Rxn #41 | AnalytiCon Plate #10 | F10      | 50        | 0.584                             | 0.0787                                               | 0.601                                                  | 3.3                    |

**S3 Table. Data from Screening of Phytochemical Library for Inhibition of KHKC Activity.**

| Rxn ID  | Sample               |          |           | Sample<br>( OD <sub>340nm</sub> ) | Ave. No Fructose Controls<br>( OD <sub>340nm</sub> ) | Ave. Fructose Only Controls<br>( OD <sub>340nm</sub> ) | KHKC<br>Inhibition (%) |
|---------|----------------------|----------|-----------|-----------------------------------|------------------------------------------------------|--------------------------------------------------------|------------------------|
|         | Phytochemical Plate  | Well     | Conc (µM) |                                   |                                                      |                                                        |                        |
| Rxn #41 | AnalytiCon Plate #10 | G10      | 50        | 0.608                             | 0.0787                                               | 0.601                                                  | -1.3                   |
| Rxn #41 | AnalytiCon Plate #10 | H10: FOC | -         | 0.607                             | 0.0787                                               | 0.601                                                  | -1.1                   |
| Rxn #41 | AnalytiCon Plate #10 | A11: NFC | -         | 0.079                             | 0.0787                                               | 0.601                                                  | 99.9                   |
| Rxn #41 | AnalytiCon Plate #10 | B11      | 50        | 0.370                             | 0.0787                                               | 0.601                                                  | 44.2                   |
| Rxn #41 | AnalytiCon Plate #10 | C11      | 50        | 0.608                             | 0.0787                                               | 0.601                                                  | -1.3                   |
| Rxn #41 | AnalytiCon Plate #10 | D11      | 50        | 0.588                             | 0.0787                                               | 0.601                                                  | 2.5                    |
| Rxn #41 | AnalytiCon Plate #10 | E11      | 50        | 0.595                             | 0.0787                                               | 0.601                                                  | 1.1                    |
| Rxn #41 | AnalytiCon Plate #10 | F11      | 50        | 0.583                             | 0.0787                                               | 0.601                                                  | 3.4                    |
| Rxn #41 | AnalytiCon Plate #10 | G11      | 50        | 0.533                             | 0.0787                                               | 0.601                                                  | 13.0                   |
| Rxn #41 | AnalytiCon Plate #10 | H11: FOC | -         | 0.629                             | 0.0787                                               | 0.601                                                  | -5.4                   |
| Rxn #41 | AnalytiCon Plate #10 | A12: NFC | -         | 0.089                             | 0.0787                                               | 0.601                                                  | 98.0                   |
| Rxn #41 | AnalytiCon Plate #10 | H12: FOC | -         | 0.656                             | 0.0787                                               | 0.601                                                  | -10.5                  |
| Rxn #46 | AnalytiCon Plate #11 | A1: NFC  | -         | 0.064                             | 0.0638                                               | 0.625                                                  | 100.0                  |
| Rxn #46 | AnalytiCon Plate #11 | B1       | 50        | 0.590                             | 0.0638                                               | 0.625                                                  | 6.2                    |
| Rxn #46 | AnalytiCon Plate #11 | C1       | 50        | 0.501                             | 0.0638                                               | 0.625                                                  | 22.1                   |
| Rxn #46 | AnalytiCon Plate #11 | D1       | 50        | 0.583                             | 0.0638                                               | 0.625                                                  | 7.5                    |
| Rxn #46 | AnalytiCon Plate #11 | E1       | 50        | 0.568                             | 0.0638                                               | 0.625                                                  | 10.2                   |
| Rxn #46 | AnalytiCon Plate #11 | F1       | 50        | 0.579                             | 0.0638                                               | 0.625                                                  | 8.2                    |
| Rxn #46 | AnalytiCon Plate #11 | G1       | 50        | 0.561                             | 0.0638                                               | 0.625                                                  | 11.4                   |
| Rxn #46 | AnalytiCon Plate #11 | H1: FOC  | -         | 0.589                             | 0.0638                                               | 0.625                                                  | 6.4                    |
| Rxn #46 | AnalytiCon Plate #11 | A2: NFC  | -         | 0.067                             | 0.0638                                               | 0.625                                                  | 99.4                   |
| Rxn #46 | AnalytiCon Plate #11 | B2       | 50        | 0.568                             | 0.0638                                               | 0.625                                                  | 10.2                   |
| Rxn #46 | AnalytiCon Plate #11 | C2       | 50        | 0.641                             | 0.0638                                               | 0.625                                                  | -2.9                   |
| Rxn #46 | AnalytiCon Plate #11 | D2       | 50        | 0.619                             | 0.0638                                               | 0.625                                                  | 1.1                    |
| Rxn #46 | AnalytiCon Plate #11 | E2       | 50        | 0.632                             | 0.0638                                               | 0.625                                                  | -1.2                   |
| Rxn #46 | AnalytiCon Plate #11 | F2       | 50        | 0.545                             | 0.0638                                               | 0.625                                                  | 14.3                   |
| Rxn #46 | AnalytiCon Plate #11 | G2       | 50        | 0.593                             | 0.0638                                               | 0.625                                                  | 5.7                    |
| Rxn #46 | AnalytiCon Plate #11 | H2: FOC  | -         | 0.620                             | 0.0638                                               | 0.625                                                  | 0.9                    |
| Rxn #46 | AnalytiCon Plate #11 | A3: NFC  | -         | 0.070                             | 0.0638                                               | 0.625                                                  | 98.9                   |
| Rxn #46 | AnalytiCon Plate #11 | B3       | 50        | 0.614                             | 0.0638                                               | 0.625                                                  | 2.0                    |
| Rxn #46 | AnalytiCon Plate #11 | C3       | 50        | 0.612                             | 0.0638                                               | 0.625                                                  | 2.3                    |
| Rxn #46 | AnalytiCon Plate #11 | D3       | 50        | 0.638                             | 0.0638                                               | 0.625                                                  | -2.3                   |
| Rxn #46 | AnalytiCon Plate #11 | E3       | 50        | 0.638                             | 0.0638                                               | 0.625                                                  | -2.3                   |
| Rxn #46 | AnalytiCon Plate #11 | F3       | 50        | 0.602                             | 0.0638                                               | 0.625                                                  | 4.1                    |
| Rxn #46 | AnalytiCon Plate #11 | G3       | 50        | 0.605                             | 0.0638                                               | 0.625                                                  | 3.6                    |
| Rxn #46 | AnalytiCon Plate #11 | H3: FOC  | -         | 0.617                             | 0.0638                                               | 0.625                                                  | 1.4                    |
| Rxn #46 | AnalytiCon Plate #11 | A4: NFC  | -         | 0.056                             | 0.0638                                               | 0.625                                                  | 101.4                  |
| Rxn #46 | AnalytiCon Plate #11 | B4       | 50        | 0.655                             | 0.0638                                               | 0.625                                                  | -5.3                   |
| Rxn #46 | AnalytiCon Plate #11 | C4       | 50        | 0.610                             | 0.0638                                               | 0.625                                                  | 2.7                    |
| Rxn #46 | AnalytiCon Plate #11 | D4       | 50        | 0.637                             | 0.0638                                               | 0.625                                                  | -2.1                   |
| Rxn #46 | AnalytiCon Plate #11 | E4       | 50        | 0.483                             | 0.0638                                               | 0.625                                                  | 25.3                   |
| Rxn #46 | AnalytiCon Plate #11 | F4       | 50        | 0.472                             | 0.0638                                               | 0.625                                                  | 27.3                   |
| Rxn #46 | AnalytiCon Plate #11 | G4       | 50        | 0.543                             | 0.0638                                               | 0.625                                                  | 14.6                   |
| Rxn #46 | AnalytiCon Plate #11 | H4: FOC  | -         | 0.623                             | 0.0638                                               | 0.625                                                  | 0.4                    |
| Rxn #46 | AnalytiCon Plate #11 | A5: NFC  | -         | 0.075                             | 0.0638                                               | 0.625                                                  | 98.0                   |
| Rxn #46 | AnalytiCon Plate #11 | B5: NFC  | -         | 0.065                             | 0.0638                                               | 0.625                                                  | 99.8                   |
| Rxn #46 | AnalytiCon Plate #11 | C5: NFC  | -         | 0.079                             | 0.0638                                               | 0.625                                                  | 97.3                   |
| Rxn #46 | AnalytiCon Plate #11 | D5: NFC  | -         | 0.062                             | 0.0638                                               | 0.625                                                  | 100.3                  |
| Rxn #46 | AnalytiCon Plate #11 | E5: FOC  | -         | 0.633                             | 0.0638                                               | 0.625                                                  | -1.4                   |
| Rxn #46 | AnalytiCon Plate #11 | F5: FOC  | -         | 0.627                             | 0.0638                                               | 0.625                                                  | -0.4                   |
| Rxn #46 | AnalytiCon Plate #11 | G5: FOC  | -         | 0.626                             | 0.0638                                               | 0.625                                                  | -0.2                   |
| Rxn #46 | AnalytiCon Plate #11 | H5: FOC  | -         | 0.612                             | 0.0638                                               | 0.625                                                  | 2.3                    |
| Rxn #46 | AnalytiCon Plate #11 | A6: NFC  | -         | 0.055                             | 0.0638                                               | 0.625                                                  | 101.6                  |
| Rxn #46 | AnalytiCon Plate #11 | B6       | 50        | 0.620                             | 0.0638                                               | 0.625                                                  | 0.9                    |
| Rxn #46 | AnalytiCon Plate #11 | C6       | 50        | 0.627                             | 0.0638                                               | 0.625                                                  | -0.4                   |
| Rxn #46 | AnalytiCon Plate #11 | D6       | 50        | 0.652                             | 0.0638                                               | 0.625                                                  | -4.8                   |
| Rxn #46 | AnalytiCon Plate #11 | E6       | 50        | 0.652                             | 0.0638                                               | 0.625                                                  | -4.8                   |
| Rxn #46 | AnalytiCon Plate #11 | F6       | 50        | 0.614                             | 0.0638                                               | 0.625                                                  | 2.0                    |
| Rxn #46 | AnalytiCon Plate #11 | G6       | 50        | 0.599                             | 0.0638                                               | 0.625                                                  | 4.6                    |
| Rxn #46 | AnalytiCon Plate #11 | H6: FOC  | -         | 0.647                             | 0.0638                                               | 0.625                                                  | -3.9                   |
| Rxn #46 | AnalytiCon Plate #11 | A7: NFC  | -         | 0.065                             | 0.0638                                               | 0.625                                                  | 99.8                   |
| Rxn #46 | AnalytiCon Plate #11 | B7       | 50        | 0.615                             | 0.0638                                               | 0.625                                                  | 1.8                    |
| Rxn #46 | AnalytiCon Plate #11 | C7       | 50        | 0.666                             | 0.0638                                               | 0.625                                                  | -7.3                   |
| Rxn #46 | AnalytiCon Plate #11 | D7       | 50        | 0.607                             | 0.0638                                               | 0.625                                                  | 3.2                    |
| Rxn #46 | AnalytiCon Plate #11 | E7       | 50        | 0.631                             | 0.0638                                               | 0.625                                                  | -1.1                   |
| Rxn #46 | AnalytiCon Plate #11 | F7       | 50        | 0.602                             | 0.0638                                               | 0.625                                                  | 4.1                    |
| Rxn #46 | AnalytiCon Plate #11 | G7       | 50        | 0.626                             | 0.0638                                               | 0.625                                                  | -0.2                   |
| Rxn #46 | AnalytiCon Plate #11 | H7: FOC  | -         | 0.658                             | 0.0638                                               | 0.625                                                  | -5.9                   |
| Rxn #46 | AnalytiCon Plate #11 | A8: NFC  | -         | 0.060                             | 0.0638                                               | 0.625                                                  | 100.7                  |
| Rxn #46 | AnalytiCon Plate #11 | B8       | 50        | 0.466                             | 0.0638                                               | 0.625                                                  | 28.3                   |
| Rxn #46 | AnalytiCon Plate #11 | C8       | 50        | 0.576                             | 0.0638                                               | 0.625                                                  | 8.7                    |
| Rxn #46 | AnalytiCon Plate #11 | D8       | 50        | 0.642                             | 0.0638                                               | 0.625                                                  | -3.0                   |
| Rxn #46 | AnalytiCon Plate #11 | E8       | 50        | 0.613                             | 0.0638                                               | 0.625                                                  | 2.1                    |
| Rxn #46 | AnalytiCon Plate #11 | F8       | 50        | 0.499                             | 0.0638                                               | 0.625                                                  | 22.5                   |

**S3 Table. Data from Screening of Phytochemical Library for Inhibition of KHKC Activity.**

| Rxn ID  | Sample               |          |           | Sample<br>( OD <sub>340nm</sub> ) | Ave. No Fructose Controls<br>( OD <sub>340nm</sub> ) | Ave. Fructose Only Controls<br>( OD <sub>340nm</sub> ) | KHKC<br>Inhibition (%) |
|---------|----------------------|----------|-----------|-----------------------------------|------------------------------------------------------|--------------------------------------------------------|------------------------|
|         | Phytochemical Plate  | Well     | Conc (µM) |                                   |                                                      |                                                        |                        |
| Rxn #46 | AnalytiCon Plate #11 | G8       | 50        | 0.596                             | 0.0638                                               | 0.625                                                  | 5.2                    |
| Rxn #46 | AnalytiCon Plate #11 | H8: FOC  | -         | 0.658                             | 0.0638                                               | 0.625                                                  | -5.9                   |
| Rxn #46 | AnalytiCon Plate #11 | A9: NFC  | -         | 0.068                             | 0.0638                                               | 0.625                                                  | 99.3                   |
| Rxn #46 | AnalytiCon Plate #11 | B9       | 50        | 0.629                             | 0.0638                                               | 0.625                                                  | -0.7                   |
| Rxn #46 | AnalytiCon Plate #11 | C9       | 50        | 0.614                             | 0.0638                                               | 0.625                                                  | 2.0                    |
| Rxn #46 | AnalytiCon Plate #11 | D9       | 50        | 0.515                             | 0.0638                                               | 0.625                                                  | 19.6                   |
| Rxn #46 | AnalytiCon Plate #11 | E9       | 50        | 0.609                             | 0.0638                                               | 0.625                                                  | 2.9                    |
| Rxn #46 | AnalytiCon Plate #11 | F9       | 50        | 0.508                             | 0.0638                                               | 0.625                                                  | 20.8                   |
| Rxn #46 | AnalytiCon Plate #11 | G9       | 50        | 0.520                             | 0.0638                                               | 0.625                                                  | 18.7                   |
| Rxn #46 | AnalytiCon Plate #11 | H9: FOC  | -         | 0.634                             | 0.0638                                               | 0.625                                                  | -1.6                   |
| Rxn #46 | AnalytiCon Plate #11 | A10: NFC | -         | 0.052                             | 0.0638                                               | 0.625                                                  | 102.1                  |
| Rxn #46 | AnalytiCon Plate #11 | B10      | 50        | 0.604                             | 0.0638                                               | 0.625                                                  | 3.7                    |
| Rxn #46 | AnalytiCon Plate #11 | C10      | 50        | 0.594                             | 0.0638                                               | 0.625                                                  | 5.5                    |
| Rxn #46 | AnalytiCon Plate #11 | D10      | 50        | 0.622                             | 0.0638                                               | 0.625                                                  | 0.5                    |
| Rxn #46 | AnalytiCon Plate #11 | E10      | 50        | 0.614                             | 0.0638                                               | 0.625                                                  | 2.0                    |
| Rxn #46 | AnalytiCon Plate #11 | F10      | 50        | 0.611                             | 0.0638                                               | 0.625                                                  | 2.5                    |
| Rxn #46 | AnalytiCon Plate #11 | G10      | 50        | 0.602                             | 0.0638                                               | 0.625                                                  | 4.1                    |
| Rxn #46 | AnalytiCon Plate #11 | H10: FOC | -         | 0.624                             | 0.0638                                               | 0.625                                                  | 0.2                    |
| Rxn #46 | AnalytiCon Plate #11 | A11: NFC | -         | 0.072                             | 0.0638                                               | 0.625                                                  | 98.5                   |
| Rxn #46 | AnalytiCon Plate #11 | B11      | 50        | 0.622                             | 0.0638                                               | 0.625                                                  | 0.5                    |
| Rxn #46 | AnalytiCon Plate #11 | C11      | 50        | 0.582                             | 0.0638                                               | 0.625                                                  | 7.7                    |
| Rxn #46 | AnalytiCon Plate #11 | D11      | 50        | 0.581                             | 0.0638                                               | 0.625                                                  | 7.8                    |
| Rxn #46 | AnalytiCon Plate #11 | E11      | 50        | 0.580                             | 0.0638                                               | 0.625                                                  | 8.0                    |
| Rxn #46 | AnalytiCon Plate #11 | F11      | 50        | 0.529                             | 0.0638                                               | 0.625                                                  | 17.1                   |
| Rxn #46 | AnalytiCon Plate #11 | G11      | 50        | 0.581                             | 0.0638                                               | 0.625                                                  | 7.8                    |
| Rxn #46 | AnalytiCon Plate #11 | H11: FOC | -         | 0.637                             | 0.0638                                               | 0.625                                                  | -2.1                   |
| Rxn #46 | AnalytiCon Plate #11 | A12: NFC | -         | 0.047                             | 0.0638                                               | 0.625                                                  | 103.0                  |
| Rxn #46 | AnalytiCon Plate #11 | H12: FOC | -         | 0.577                             | 0.0638                                               | 0.625                                                  | 8.6                    |
| Rxn #47 | AnalytiCon Plate #12 | A1: NFC  | -         | 0.070                             | 0.0642                                               | 0.645                                                  | 99.0                   |
| Rxn #47 | AnalytiCon Plate #12 | B1       | 50        | 0.620                             | 0.0642                                               | 0.645                                                  | 4.3                    |
| Rxn #47 | AnalytiCon Plate #12 | C1       | 50        | 0.604                             | 0.0642                                               | 0.645                                                  | 7.1                    |
| Rxn #47 | AnalytiCon Plate #12 | D1       | 50        | 0.607                             | 0.0642                                               | 0.645                                                  | 6.5                    |
| Rxn #47 | AnalytiCon Plate #12 | E1       | 50        | 0.593                             | 0.0642                                               | 0.645                                                  | 9.0                    |
| Rxn #47 | AnalytiCon Plate #12 | F1       | 50        | 0.568                             | 0.0642                                               | 0.645                                                  | 13.3                   |
| Rxn #47 | AnalytiCon Plate #12 | G1       | 50        | 0.587                             | 0.0642                                               | 0.645                                                  | 10.0                   |
| Rxn #47 | AnalytiCon Plate #12 | H1: FOC  | -         | 0.581                             | 0.0642                                               | 0.645                                                  | 11.0                   |
| Rxn #47 | AnalytiCon Plate #12 | A2: NFC  | -         | 0.081                             | 0.0642                                               | 0.645                                                  | 97.1                   |
| Rxn #47 | AnalytiCon Plate #12 | B2       | 50        | 0.630                             | 0.0642                                               | 0.645                                                  | 2.6                    |
| Rxn #47 | AnalytiCon Plate #12 | C2       | 50        | 0.615                             | 0.0642                                               | 0.645                                                  | 5.2                    |
| Rxn #47 | AnalytiCon Plate #12 | D2       | 50        | 0.653                             | 0.0642                                               | 0.645                                                  | -1.4                   |
| Rxn #47 | AnalytiCon Plate #12 | E2       | 50        | 0.636                             | 0.0642                                               | 0.645                                                  | 1.5                    |
| Rxn #47 | AnalytiCon Plate #12 | F2       | 50        | 0.522                             | 0.0642                                               | 0.645                                                  | 21.2                   |
| Rxn #47 | AnalytiCon Plate #12 | G2       | 50        | 0.637                             | 0.0642                                               | 0.645                                                  | 1.4                    |
| Rxn #47 | AnalytiCon Plate #12 | H2: FOC  | -         | 0.632                             | 0.0642                                               | 0.645                                                  | 2.2                    |
| Rxn #47 | AnalytiCon Plate #12 | A3: NFC  | -         | 0.079                             | 0.0642                                               | 0.645                                                  | 97.5                   |
| Rxn #47 | AnalytiCon Plate #12 | B3       | 50        | 0.651                             | 0.0642                                               | 0.645                                                  | -1.0                   |
| Rxn #47 | AnalytiCon Plate #12 | C3       | 50        | 0.629                             | 0.0642                                               | 0.645                                                  | 2.8                    |
| Rxn #47 | AnalytiCon Plate #12 | D3       | 50        | 0.566                             | 0.0642                                               | 0.645                                                  | 13.6                   |
| Rxn #47 | AnalytiCon Plate #12 | E3       | 50        | 0.639                             | 0.0642                                               | 0.645                                                  | 1.0                    |
| Rxn #47 | AnalytiCon Plate #12 | F3       | 50        | 0.637                             | 0.0642                                               | 0.645                                                  | 1.4                    |
| Rxn #47 | AnalytiCon Plate #12 | G3       | 50        | 0.627                             | 0.0642                                               | 0.645                                                  | 3.1                    |
| Rxn #47 | AnalytiCon Plate #12 | H3: FOC  | -         | 0.660                             | 0.0642                                               | 0.645                                                  | -2.6                   |
| Rxn #47 | AnalytiCon Plate #12 | A4: NFC  | -         | 0.060                             | 0.0642                                               | 0.645                                                  | 100.7                  |
| Rxn #47 | AnalytiCon Plate #12 | B4       | 50        | 0.631                             | 0.0642                                               | 0.645                                                  | 2.4                    |
| Rxn #47 | AnalytiCon Plate #12 | C4       | 50        | 0.653                             | 0.0642                                               | 0.645                                                  | -1.4                   |
| Rxn #47 | AnalytiCon Plate #12 | D4       | 50        | 0.626                             | 0.0642                                               | 0.645                                                  | 3.3                    |
| Rxn #47 | AnalytiCon Plate #12 | E4       | 50        | 0.626                             | 0.0642                                               | 0.645                                                  | 3.3                    |
| Rxn #47 | AnalytiCon Plate #12 | F4       | 50        | 0.645                             | 0.0642                                               | 0.645                                                  | 0.0                    |
| Rxn #47 | AnalytiCon Plate #12 | G4       | 50        | 0.659                             | 0.0642                                               | 0.645                                                  | -2.4                   |
| Rxn #47 | AnalytiCon Plate #12 | H4: FOC  | -         | 0.668                             | 0.0642                                               | 0.645                                                  | -4.0                   |
| Rxn #47 | AnalytiCon Plate #12 | A5: NFC  | -         | 0.080                             | 0.0642                                               | 0.645                                                  | 97.3                   |
| Rxn #47 | AnalytiCon Plate #12 | B5: NFC  | -         | 0.061                             | 0.0642                                               | 0.645                                                  | 100.6                  |
| Rxn #47 | AnalytiCon Plate #12 | C5: NFC  | -         | 0.059                             | 0.0642                                               | 0.645                                                  | 100.9                  |
| Rxn #47 | AnalytiCon Plate #12 | D5: NFC  | -         | 0.065                             | 0.0642                                               | 0.645                                                  | 99.9                   |
| Rxn #47 | AnalytiCon Plate #12 | E5: FOC  | -         | 0.655                             | 0.0642                                               | 0.645                                                  | -1.7                   |
| Rxn #47 | AnalytiCon Plate #12 | F5: FOC  | -         | 0.648                             | 0.0642                                               | 0.645                                                  | -0.5                   |
| Rxn #47 | AnalytiCon Plate #12 | G5: FOC  | -         | 0.665                             | 0.0642                                               | 0.645                                                  | -3.4                   |
| Rxn #47 | AnalytiCon Plate #12 | H5: FOC  | -         | 0.662                             | 0.0642                                               | 0.645                                                  | -2.9                   |
| Rxn #47 | AnalytiCon Plate #12 | A6: NFC  | -         | 0.075                             | 0.0642                                               | 0.645                                                  | 98.1                   |
| Rxn #47 | AnalytiCon Plate #12 | B6       | 50        | 0.654                             | 0.0642                                               | 0.645                                                  | -1.5                   |
| Rxn #47 | AnalytiCon Plate #12 | C6       | 50        | 0.655                             | 0.0642                                               | 0.645                                                  | -1.7                   |
| Rxn #47 | AnalytiCon Plate #12 | D6       | 50        | 0.616                             | 0.0642                                               | 0.645                                                  | 5.0                    |
| Rxn #47 | AnalytiCon Plate #12 | E6       | 50        | 0.557                             | 0.0642                                               | 0.645                                                  | 15.2                   |
| Rxn #47 | AnalytiCon Plate #12 | F6       | 50        | 0.631                             | 0.0642                                               | 0.645                                                  | 2.4                    |

**S3 Table. Data from Screening of Phytochemical Library for Inhibition of KHKC Activity.**

| Rxn ID  | Sample               |          |           | Sample<br>( OD <sub>340nm</sub> ) | Ave. No Fructose Controls<br>( OD <sub>340nm</sub> ) | Ave. Fructose Only Controls<br>( OD <sub>340nm</sub> ) | KHKC<br>Inhibition (%) |
|---------|----------------------|----------|-----------|-----------------------------------|------------------------------------------------------|--------------------------------------------------------|------------------------|
|         | Phytochemical Plate  | Well     | Conc (µM) |                                   |                                                      |                                                        |                        |
| Rxn #47 | AnalytiCon Plate #12 | G6       | 50        | 0.657                             | 0.0642                                               | 0.645                                                  | -2.1                   |
| Rxn #47 | AnalytiCon Plate #12 | H6: FOC  | -         | 0.630                             | 0.0642                                               | 0.645                                                  | 2.6                    |
| Rxn #47 | AnalytiCon Plate #12 | A7: NFC  | -         | 0.062                             | 0.0642                                               | 0.645                                                  | 100.4                  |
| Rxn #47 | AnalytiCon Plate #12 | B7       | 50        | 0.617                             | 0.0642                                               | 0.645                                                  | 4.8                    |
| Rxn #47 | AnalytiCon Plate #12 | C7       | 50        | 0.603                             | 0.0642                                               | 0.645                                                  | 7.2                    |
| Rxn #47 | AnalytiCon Plate #12 | D7       | 50        | 0.630                             | 0.0642                                               | 0.645                                                  | 2.6                    |
| Rxn #47 | AnalytiCon Plate #12 | E7       | 50        | 0.660                             | 0.0642                                               | 0.645                                                  | -2.6                   |
| Rxn #47 | AnalytiCon Plate #12 | F7       | 50        | 0.584                             | 0.0642                                               | 0.645                                                  | 10.5                   |
| Rxn #47 | AnalytiCon Plate #12 | G7       | 50        | 0.571                             | 0.0642                                               | 0.645                                                  | 12.7                   |
| Rxn #47 | AnalytiCon Plate #12 | H7: FOC  | -         | 0.648                             | 0.0642                                               | 0.645                                                  | -0.5                   |
| Rxn #47 | AnalytiCon Plate #12 | A8: NFC  | -         | 0.064                             | 0.0642                                               | 0.645                                                  | 100.0                  |
| Rxn #47 | AnalytiCon Plate #12 | B8       | 50        | 0.637                             | 0.0642                                               | 0.645                                                  | 1.4                    |
| Rxn #47 | AnalytiCon Plate #12 | C8       | 50        | 0.579                             | 0.0642                                               | 0.645                                                  | 11.4                   |
| Rxn #47 | AnalytiCon Plate #12 | D8       | 50        | 0.568                             | 0.0642                                               | 0.645                                                  | 13.3                   |
| Rxn #47 | AnalytiCon Plate #12 | E8       | 50        | 0.583                             | 0.0642                                               | 0.645                                                  | 10.7                   |
| Rxn #47 | AnalytiCon Plate #12 | F8       | 50        | 0.558                             | 0.0642                                               | 0.645                                                  | 15.0                   |
| Rxn #47 | AnalytiCon Plate #12 | G8       | 50        | 0.620                             | 0.0642                                               | 0.645                                                  | 4.3                    |
| Rxn #47 | AnalytiCon Plate #12 | H8: FOC  | -         | 0.654                             | 0.0642                                               | 0.645                                                  | -1.5                   |
| Rxn #47 | AnalytiCon Plate #12 | A9: NFC  | -         | 0.049                             | 0.0642                                               | 0.645                                                  | 102.6                  |
| Rxn #47 | AnalytiCon Plate #12 | B9       | 50        | 0.612                             | 0.0642                                               | 0.645                                                  | 5.7                    |
| Rxn #47 | AnalytiCon Plate #12 | C9       | 50        | 0.622                             | 0.0642                                               | 0.645                                                  | 4.0                    |
| Rxn #47 | AnalytiCon Plate #12 | D9       | 50        | 0.610                             | 0.0642                                               | 0.645                                                  | 6.0                    |
| Rxn #47 | AnalytiCon Plate #12 | E9       | 50        | 0.612                             | 0.0642                                               | 0.645                                                  | 5.7                    |
| Rxn #47 | AnalytiCon Plate #12 | F9       | 50        | 0.616                             | 0.0642                                               | 0.645                                                  | 5.0                    |
| Rxn #47 | AnalytiCon Plate #12 | G9       | 50        | 0.622                             | 0.0642                                               | 0.645                                                  | 4.0                    |
| Rxn #47 | AnalytiCon Plate #12 | H9: FOC  | -         | 0.652                             | 0.0642                                               | 0.645                                                  | -1.2                   |
| Rxn #47 | AnalytiCon Plate #12 | A10: NFC | -         | 0.045                             | 0.0642                                               | 0.645                                                  | 103.3                  |
| Rxn #47 | AnalytiCon Plate #12 | B10      | 50        | 0.615                             | 0.0642                                               | 0.645                                                  | 5.2                    |
| Rxn #47 | AnalytiCon Plate #12 | C10      | 50        | 0.616                             | 0.0642                                               | 0.645                                                  | 5.0                    |
| Rxn #47 | AnalytiCon Plate #12 | D10      | 50        | 0.617                             | 0.0642                                               | 0.645                                                  | 4.8                    |
| Rxn #47 | AnalytiCon Plate #12 | E10      | 50        | 0.616                             | 0.0642                                               | 0.645                                                  | 5.0                    |
| Rxn #47 | AnalytiCon Plate #12 | F10      | 50        | 0.609                             | 0.0642                                               | 0.645                                                  | 6.2                    |
| Rxn #47 | AnalytiCon Plate #12 | G10      | 50        | 0.570                             | 0.0642                                               | 0.645                                                  | 12.9                   |
| Rxn #47 | AnalytiCon Plate #12 | H10: FOC | -         | 0.635                             | 0.0642                                               | 0.645                                                  | 1.7                    |
| Rxn #47 | AnalytiCon Plate #12 | A11: NFC | -         | 0.053                             | 0.0642                                               | 0.645                                                  | 101.9                  |
| Rxn #47 | AnalytiCon Plate #12 | B11      | 50        | 0.586                             | 0.0642                                               | 0.645                                                  | 10.2                   |
| Rxn #47 | AnalytiCon Plate #12 | C11      | 50        | 0.609                             | 0.0642                                               | 0.645                                                  | 6.2                    |
| Rxn #47 | AnalytiCon Plate #12 | D11      | 50        | 0.596                             | 0.0642                                               | 0.645                                                  | 8.4                    |
| Rxn #47 | AnalytiCon Plate #12 | E11      | 50        | 0.613                             | 0.0642                                               | 0.645                                                  | 5.5                    |
| Rxn #47 | AnalytiCon Plate #12 | F11      | 50        | 0.596                             | 0.0642                                               | 0.645                                                  | 8.4                    |
| Rxn #47 | AnalytiCon Plate #12 | G11      | 50        | 0.596                             | 0.0642                                               | 0.645                                                  | 8.4                    |
| Rxn #47 | AnalytiCon Plate #12 | H11: FOC | -         | 0.646                             | 0.0642                                               | 0.645                                                  | -0.2                   |
| Rxn #47 | AnalytiCon Plate #12 | A12: NFC | -         | 0.060                             | 0.0642                                               | 0.645                                                  | 100.7                  |
| Rxn #47 | AnalytiCon Plate #12 | H12: FOC | -         | 0.598                             | 0.0642                                               | 0.645                                                  | 8.1                    |
| Rxn #48 | AnalytiCon Plate #13 | A1: NFC  | -         | 0.043                             | 0.0515                                               | 0.560                                                  | 101.7                  |
| Rxn #48 | AnalytiCon Plate #13 | B1       | 50        | 0.540                             | 0.0515                                               | 0.560                                                  | 3.9                    |
| Rxn #48 | AnalytiCon Plate #13 | C1       | 50        | 0.547                             | 0.0515                                               | 0.560                                                  | 2.6                    |
| Rxn #48 | AnalytiCon Plate #13 | D1       | 50        | 0.540                             | 0.0515                                               | 0.560                                                  | 3.9                    |
| Rxn #48 | AnalytiCon Plate #13 | E1       | 50        | 0.544                             | 0.0515                                               | 0.560                                                  | 3.1                    |
| Rxn #48 | AnalytiCon Plate #13 | F1       | 50        | 0.540                             | 0.0515                                               | 0.560                                                  | 3.9                    |
| Rxn #48 | AnalytiCon Plate #13 | G1       | 50        | 0.529                             | 0.0515                                               | 0.560                                                  | 6.1                    |
| Rxn #48 | AnalytiCon Plate #13 | H1: FOC  | -         | 0.537                             | 0.0515                                               | 0.560                                                  | 4.5                    |
| Rxn #48 | AnalytiCon Plate #13 | A2: NFC  | -         | 0.059                             | 0.0515                                               | 0.560                                                  | 98.5                   |
| Rxn #48 | AnalytiCon Plate #13 | B2       | 50        | 0.523                             | 0.0515                                               | 0.560                                                  | 7.3                    |
| Rxn #48 | AnalytiCon Plate #13 | C2       | 50        | 0.532                             | 0.0515                                               | 0.560                                                  | 5.5                    |
| Rxn #48 | AnalytiCon Plate #13 | D2       | 50        | 0.547                             | 0.0515                                               | 0.560                                                  | 2.6                    |
| Rxn #48 | AnalytiCon Plate #13 | E2       | 50        | 0.543                             | 0.0515                                               | 0.560                                                  | 3.3                    |
| Rxn #48 | AnalytiCon Plate #13 | F2       | 50        | 0.554                             | 0.0515                                               | 0.560                                                  | 1.2                    |
| Rxn #48 | AnalytiCon Plate #13 | G2       | 50        | 0.492                             | 0.0515                                               | 0.560                                                  | 13.4                   |
| Rxn #48 | AnalytiCon Plate #13 | H2: FOC  | -         | 0.560                             | 0.0515                                               | 0.560                                                  | 0.0                    |
| Rxn #48 | AnalytiCon Plate #13 | A3: NFC  | -         | 0.059                             | 0.0515                                               | 0.560                                                  | 98.5                   |
| Rxn #48 | AnalytiCon Plate #13 | B3       | 50        | 0.498                             | 0.0515                                               | 0.560                                                  | 12.2                   |
| Rxn #48 | AnalytiCon Plate #13 | C3       | 50        | 0.540                             | 0.0515                                               | 0.560                                                  | 3.9                    |
| Rxn #48 | AnalytiCon Plate #13 | D3       | 50        | 0.543                             | 0.0515                                               | 0.560                                                  | 3.3                    |
| Rxn #48 | AnalytiCon Plate #13 | E3       | 50        | 0.461                             | 0.0515                                               | 0.560                                                  | 19.5                   |
| Rxn #48 | AnalytiCon Plate #13 | F3       | 50        | 0.544                             | 0.0515                                               | 0.560                                                  | 3.1                    |
| Rxn #48 | AnalytiCon Plate #13 | G3       | 50        | 0.545                             | 0.0515                                               | 0.560                                                  | 2.9                    |
| Rxn #48 | AnalytiCon Plate #13 | H3: FOC  | -         | 0.572                             | 0.0515                                               | 0.560                                                  | -2.4                   |
| Rxn #48 | AnalytiCon Plate #13 | A4: NFC  | -         | 0.056                             | 0.0515                                               | 0.560                                                  | 99.1                   |
| Rxn #48 | AnalytiCon Plate #13 | B4       | 50        | 0.558                             | 0.0515                                               | 0.560                                                  | 0.4                    |
| Rxn #48 | AnalytiCon Plate #13 | C4       | 50        | 0.543                             | 0.0515                                               | 0.560                                                  | 3.3                    |
| Rxn #48 | AnalytiCon Plate #13 | D4       | 50        | 0.548                             | 0.0515                                               | 0.560                                                  | 2.4                    |
| Rxn #48 | AnalytiCon Plate #13 | E4       | 50        | 0.538                             | 0.0515                                               | 0.560                                                  | 4.3                    |
| Rxn #48 | AnalytiCon Plate #13 | F4       | 50        | 0.559                             | 0.0515                                               | 0.560                                                  | 0.2                    |

**S3 Table. Data from Screening of Phytochemical Library for Inhibition of KHKC Activity.**

| Rxn ID  | Sample               |          |           | Sample<br>( OD <sub>340nm</sub> ) | Ave. No Fructose Controls<br>( OD <sub>340nm</sub> ) | Ave. Fructose Only Controls<br>( OD <sub>340nm</sub> ) | KHKC<br>Inhibition (%) |
|---------|----------------------|----------|-----------|-----------------------------------|------------------------------------------------------|--------------------------------------------------------|------------------------|
|         | Phytochemical Plate  | Well     | Conc (µM) |                                   |                                                      |                                                        |                        |
| Rxn #48 | AnalytiCon Plate #13 | G4       | 50        | 0.496                             | 0.0515                                               | 0.560                                                  | 12.6                   |
| Rxn #48 | AnalytiCon Plate #13 | H4: FOC  | -         | 0.561                             | 0.0515                                               | 0.560                                                  | -0.2                   |
| Rxn #48 | AnalytiCon Plate #13 | A5: NFC  | -         | 0.050                             | 0.0515                                               | 0.560                                                  | 100.3                  |
| Rxn #48 | AnalytiCon Plate #13 | B5: NFC  | -         | 0.052                             | 0.0515                                               | 0.560                                                  | 99.9                   |
| Rxn #48 | AnalytiCon Plate #13 | C5: NFC  | -         | 0.050                             | 0.0515                                               | 0.560                                                  | 100.3                  |
| Rxn #48 | AnalytiCon Plate #13 | D5: NFC  | -         | 0.058                             | 0.0515                                               | 0.560                                                  | 98.7                   |
| Rxn #48 | AnalytiCon Plate #13 | E5: FOC  | -         | 0.566                             | 0.0515                                               | 0.560                                                  | -1.2                   |
| Rxn #48 | AnalytiCon Plate #13 | F5: FOC  | -         | 0.559                             | 0.0515                                               | 0.560                                                  | 0.2                    |
| Rxn #48 | AnalytiCon Plate #13 | G5: FOC  | -         | 0.561                             | 0.0515                                               | 0.560                                                  | -0.2                   |
| Rxn #48 | AnalytiCon Plate #13 | H5: FOC  | -         | 0.564                             | 0.0515                                               | 0.560                                                  | -0.8                   |
| Rxn #48 | AnalytiCon Plate #13 | A6: NFC  | -         | 0.049                             | 0.0515                                               | 0.560                                                  | 100.5                  |
| Rxn #48 | AnalytiCon Plate #13 | B6       | 50        | 0.534                             | 0.0515                                               | 0.560                                                  | 5.1                    |
| Rxn #48 | AnalytiCon Plate #13 | C6       | 50        | 0.496                             | 0.0515                                               | 0.560                                                  | 12.6                   |
| Rxn #48 | AnalytiCon Plate #13 | D6       | 50        | 0.564                             | 0.0515                                               | 0.560                                                  | -0.8                   |
| Rxn #48 | AnalytiCon Plate #13 | E6       | 50        | 0.559                             | 0.0515                                               | 0.560                                                  | 0.2                    |
| Rxn #48 | AnalytiCon Plate #13 | F6       | 50        | 0.562                             | 0.0515                                               | 0.560                                                  | -0.4                   |
| Rxn #48 | AnalytiCon Plate #13 | G6       | 50        | 0.242                             | 0.0515                                               | 0.560                                                  | 62.5                   |
| Rxn #48 | AnalytiCon Plate #13 | H6: FOC  | -         | 0.571                             | 0.0515                                               | 0.560                                                  | -2.2                   |
| Rxn #48 | AnalytiCon Plate #13 | A7: NFC  | -         | 0.051                             | 0.0515                                               | 0.560                                                  | 100.1                  |
| Rxn #48 | AnalytiCon Plate #13 | B7       | 50        | 0.568                             | 0.0515                                               | 0.560                                                  | -1.6                   |
| Rxn #48 | AnalytiCon Plate #13 | C7       | 50        | 0.559                             | 0.0515                                               | 0.560                                                  | 0.2                    |
| Rxn #48 | AnalytiCon Plate #13 | D7       | 50        | 0.564                             | 0.0515                                               | 0.560                                                  | -0.8                   |
| Rxn #48 | AnalytiCon Plate #13 | E7       | 50        | 0.565                             | 0.0515                                               | 0.560                                                  | -1.0                   |
| Rxn #48 | AnalytiCon Plate #13 | F7       | 50        | 0.545                             | 0.0515                                               | 0.560                                                  | 2.9                    |
| Rxn #48 | AnalytiCon Plate #13 | G7       | 50        | 0.551                             | 0.0515                                               | 0.560                                                  | 1.8                    |
| Rxn #48 | AnalytiCon Plate #13 | H7: FOC  | -         | 0.548                             | 0.0515                                               | 0.560                                                  | 2.4                    |
| Rxn #48 | AnalytiCon Plate #13 | A8: NFC  | -         | 0.053                             | 0.0515                                               | 0.560                                                  | 99.7                   |
| Rxn #48 | AnalytiCon Plate #13 | B8       | 50        | 0.554                             | 0.0515                                               | 0.560                                                  | 1.2                    |
| Rxn #48 | AnalytiCon Plate #13 | C8       | 50        | 0.588                             | 0.0515                                               | 0.560                                                  | -5.5                   |
| Rxn #48 | AnalytiCon Plate #13 | D8       | 50        | 0.521                             | 0.0515                                               | 0.560                                                  | 7.7                    |
| Rxn #48 | AnalytiCon Plate #13 | E8       | 50        | 0.552                             | 0.0515                                               | 0.560                                                  | 1.6                    |
| Rxn #48 | AnalytiCon Plate #13 | F8       | 50        | 0.522                             | 0.0515                                               | 0.560                                                  | 7.5                    |
| Rxn #48 | AnalytiCon Plate #13 | G8       | 50        | 0.541                             | 0.0515                                               | 0.560                                                  | 3.7                    |
| Rxn #48 | AnalytiCon Plate #13 | H8: FOC  | -         | 0.560                             | 0.0515                                               | 0.560                                                  | 0.0                    |
| Rxn #48 | AnalytiCon Plate #13 | A9: NFC  | -         | 0.047                             | 0.0515                                               | 0.560                                                  | 100.9                  |
| Rxn #48 | AnalytiCon Plate #13 | B9       | 50        | 0.554                             | 0.0515                                               | 0.560                                                  | 1.2                    |
| Rxn #48 | AnalytiCon Plate #13 | C9       | 50        | 0.567                             | 0.0515                                               | 0.560                                                  | -1.4                   |
| Rxn #48 | AnalytiCon Plate #13 | D9       | 50        | 0.566                             | 0.0515                                               | 0.560                                                  | -1.2                   |
| Rxn #48 | AnalytiCon Plate #13 | E9       | 50        | 0.557                             | 0.0515                                               | 0.560                                                  | 0.6                    |
| Rxn #48 | AnalytiCon Plate #13 | F9       | 50        | 0.565                             | 0.0515                                               | 0.560                                                  | -1.0                   |
| Rxn #48 | AnalytiCon Plate #13 | G9       | 50        | 0.588                             | 0.0515                                               | 0.560                                                  | -5.5                   |
| Rxn #48 | AnalytiCon Plate #13 | H9: FOC  | -         | 0.569                             | 0.0515                                               | 0.560                                                  | -1.8                   |
| Rxn #48 | AnalytiCon Plate #13 | A10: NFC | -         | 0.048                             | 0.0515                                               | 0.560                                                  | 100.7                  |
| Rxn #48 | AnalytiCon Plate #13 | B10      | 50        | 0.534                             | 0.0515                                               | 0.560                                                  | 5.1                    |
| Rxn #48 | AnalytiCon Plate #13 | C10      | 50        | 0.560                             | 0.0515                                               | 0.560                                                  | 0.0                    |
| Rxn #48 | AnalytiCon Plate #13 | D10      | 50        | 0.568                             | 0.0515                                               | 0.560                                                  | -1.6                   |
| Rxn #48 | AnalytiCon Plate #13 | E10      | 50        | 0.529                             | 0.0515                                               | 0.560                                                  | 6.1                    |
| Rxn #48 | AnalytiCon Plate #13 | F10      | 50        | 0.557                             | 0.0515                                               | 0.560                                                  | 0.6                    |
| Rxn #48 | AnalytiCon Plate #13 | G10      | 50        | 0.559                             | 0.0515                                               | 0.560                                                  | 0.2                    |
| Rxn #48 | AnalytiCon Plate #13 | H10: FOC | -         | 0.574                             | 0.0515                                               | 0.560                                                  | -2.8                   |
| Rxn #48 | AnalytiCon Plate #13 | A11: NFC | -         | 0.047                             | 0.0515                                               | 0.560                                                  | 100.9                  |
| Rxn #48 | AnalytiCon Plate #13 | B11      | 50        | 0.567                             | 0.0515                                               | 0.560                                                  | -1.4                   |
| Rxn #48 | AnalytiCon Plate #13 | C11      | 50        | 0.556                             | 0.0515                                               | 0.560                                                  | 0.8                    |
| Rxn #48 | AnalytiCon Plate #13 | D11      | 50        | 0.575                             | 0.0515                                               | 0.560                                                  | -2.9                   |
| Rxn #48 | AnalytiCon Plate #13 | E11      | 50        | 0.587                             | 0.0515                                               | 0.560                                                  | -5.3                   |
| Rxn #48 | AnalytiCon Plate #13 | F11      | 50        | 0.591                             | 0.0515                                               | 0.560                                                  | -6.1                   |
| Rxn #48 | AnalytiCon Plate #13 | G11      | 50        | 0.569                             | 0.0515                                               | 0.560                                                  | -1.8                   |
| Rxn #48 | AnalytiCon Plate #13 | H11: FOC | -         | 0.594                             | 0.0515                                               | 0.560                                                  | -6.7                   |
| Rxn #48 | AnalytiCon Plate #13 | A12: NFC | -         | 0.051                             | 0.0515                                               | 0.560                                                  | 100.1                  |
| Rxn #48 | AnalytiCon Plate #13 | H12: FOC | -         | 0.614                             | 0.0515                                               | 0.560                                                  | -10.6                  |
| Rxn #49 | AnalytiCon Plate #14 | A1: NFC  | -         | 0.046                             | 0.0498                                               | 0.568                                                  | 100.7                  |
| Rxn #49 | AnalytiCon Plate #14 | B1       | 50        | 0.524                             | 0.0498                                               | 0.568                                                  | 8.5                    |
| Rxn #49 | AnalytiCon Plate #14 | C1       | 50        | 0.488                             | 0.0498                                               | 0.568                                                  | 15.4                   |
| Rxn #49 | AnalytiCon Plate #14 | D1       | 50        | 0.495                             | 0.0498                                               | 0.568                                                  | 14.1                   |
| Rxn #49 | AnalytiCon Plate #14 | E1       | 50        | 0.552                             | 0.0498                                               | 0.568                                                  | 3.1                    |
| Rxn #49 | AnalytiCon Plate #14 | F1       | 50        | 0.555                             | 0.0498                                               | 0.568                                                  | 2.5                    |
| Rxn #49 | AnalytiCon Plate #14 | G1       | 50        | 0.475                             | 0.0498                                               | 0.568                                                  | 17.9                   |
| Rxn #49 | AnalytiCon Plate #14 | H1: FOC  | -         | 0.518                             | 0.0498                                               | 0.568                                                  | 9.6                    |
| Rxn #49 | AnalytiCon Plate #14 | A2: NFC  | -         | 0.044                             | 0.0498                                               | 0.568                                                  | 101.1                  |
| Rxn #49 | AnalytiCon Plate #14 | B2       | 50        | 0.516                             | 0.0498                                               | 0.568                                                  | 10.0                   |
| Rxn #49 | AnalytiCon Plate #14 | C2       | 50        | 0.532                             | 0.0498                                               | 0.568                                                  | 6.9                    |
| Rxn #49 | AnalytiCon Plate #14 | D2       | 50        | 0.548                             | 0.0498                                               | 0.568                                                  | 3.9                    |
| Rxn #49 | AnalytiCon Plate #14 | E2       | 50        | 0.572                             | 0.0498                                               | 0.568                                                  | -0.8                   |
| Rxn #49 | AnalytiCon Plate #14 | F2       | 50        | 0.530                             | 0.0498                                               | 0.568                                                  | 7.3                    |



**S3 Table. Data from Screening of Phytochemical Library for Inhibition of KHKC Activity.**

| Rxn ID  | Sample               |          |           | Sample<br>( OD <sub>340nm</sub> ) | Ave. No Fructose Controls<br>( OD <sub>340nm</sub> ) | Ave. Fructose Only Controls<br>( OD <sub>340nm</sub> ) | KHKC<br>Inhibition (%) |
|---------|----------------------|----------|-----------|-----------------------------------|------------------------------------------------------|--------------------------------------------------------|------------------------|
|         | Phytochemical Plate  | Well     | Conc (µM) |                                   |                                                      |                                                        |                        |
| Rxn #49 | AnalytiCon Plate #14 | G2       | 50        | 0.555                             | 0.0498                                               | 0.568                                                  | 2.5                    |
| Rxn #49 | AnalytiCon Plate #14 | H2: FOC  | -         | 0.562                             | 0.0498                                               | 0.568                                                  | 1.2                    |
| Rxn #49 | AnalytiCon Plate #14 | A3: NFC  | -         | 0.050                             | 0.0498                                               | 0.568                                                  | 100.0                  |
| Rxn #49 | AnalytiCon Plate #14 | B3       | 50        | 0.544                             | 0.0498                                               | 0.568                                                  | 4.6                    |
| Rxn #49 | AnalytiCon Plate #14 | C3       | 50        | 0.498                             | 0.0498                                               | 0.568                                                  | 13.5                   |
| Rxn #49 | AnalytiCon Plate #14 | D3       | 50        | 0.567                             | 0.0498                                               | 0.568                                                  | 0.2                    |
| Rxn #49 | AnalytiCon Plate #14 | E3       | 50        | 0.478                             | 0.0498                                               | 0.568                                                  | 17.4                   |
| Rxn #49 | AnalytiCon Plate #14 | F3       | 50        | 0.566                             | 0.0498                                               | 0.568                                                  | 0.4                    |
| Rxn #49 | AnalytiCon Plate #14 | G3       | 50        | 0.553                             | 0.0498                                               | 0.568                                                  | 2.9                    |
| Rxn #49 | AnalytiCon Plate #14 | H3: FOC  | -         | 0.551                             | 0.0498                                               | 0.568                                                  | 3.3                    |
| Rxn #49 | AnalytiCon Plate #14 | A4: NFC  | -         | 0.039                             | 0.0498                                               | 0.568                                                  | 102.1                  |
| Rxn #49 | AnalytiCon Plate #14 | B4       | 50        | 0.484                             | 0.0498                                               | 0.568                                                  | 16.2                   |
| Rxn #49 | AnalytiCon Plate #14 | C4       | 50        | 0.533                             | 0.0498                                               | 0.568                                                  | 6.8                    |
| Rxn #49 | AnalytiCon Plate #14 | D4       | 50        | 0.571                             | 0.0498                                               | 0.568                                                  | -0.6                   |
| Rxn #49 | AnalytiCon Plate #14 | E4       | 50        | 0.565                             | 0.0498                                               | 0.568                                                  | 0.6                    |
| Rxn #49 | AnalytiCon Plate #14 | F4       | 50        | 0.505                             | 0.0498                                               | 0.568                                                  | 12.2                   |
| Rxn #49 | AnalytiCon Plate #14 | G4       | 50        | 0.555                             | 0.0498                                               | 0.568                                                  | 2.5                    |
| Rxn #49 | AnalytiCon Plate #14 | H4: FOC  | -         | 0.591                             | 0.0498                                               | 0.568                                                  | -4.4                   |
| Rxn #49 | AnalytiCon Plate #14 | A5: NFC  | -         | 0.046                             | 0.0498                                               | 0.568                                                  | 100.7                  |
| Rxn #49 | AnalytiCon Plate #14 | B5: NFC  | -         | 0.050                             | 0.0498                                               | 0.568                                                  | 100.0                  |
| Rxn #49 | AnalytiCon Plate #14 | C5: NFC  | -         | 0.050                             | 0.0498                                               | 0.568                                                  | 100.0                  |
| Rxn #49 | AnalytiCon Plate #14 | D5: NFC  | -         | 0.052                             | 0.0498                                               | 0.568                                                  | 99.6                   |
| Rxn #49 | AnalytiCon Plate #14 | E5: FOC  | -         | 0.576                             | 0.0498                                               | 0.568                                                  | -1.5                   |
| Rxn #49 | AnalytiCon Plate #14 | F5: FOC  | -         | 0.571                             | 0.0498                                               | 0.568                                                  | -0.6                   |
| Rxn #49 | AnalytiCon Plate #14 | G5: FOC  | -         | 0.581                             | 0.0498                                               | 0.568                                                  | -2.5                   |
| Rxn #49 | AnalytiCon Plate #14 | H5: FOC  | -         | 0.585                             | 0.0498                                               | 0.568                                                  | -3.3                   |
| Rxn #49 | AnalytiCon Plate #14 | A6: NFC  | -         | 0.042                             | 0.0498                                               | 0.568                                                  | 101.5                  |
| Rxn #49 | AnalytiCon Plate #14 | B6       | 50        | 0.490                             | 0.0498                                               | 0.568                                                  | 15.1                   |
| Rxn #49 | AnalytiCon Plate #14 | C6       | 50        | 0.378                             | 0.0498                                               | 0.568                                                  | 36.7                   |
| Rxn #49 | AnalytiCon Plate #14 | D6       | 50        | 0.572                             | 0.0498                                               | 0.568                                                  | -0.8                   |
| Rxn #49 | AnalytiCon Plate #14 | E6       | 50        | 0.504                             | 0.0498                                               | 0.568                                                  | 12.4                   |
| Rxn #49 | AnalytiCon Plate #14 | F6       | 50        | 0.576                             | 0.0498                                               | 0.568                                                  | -1.5                   |
| Rxn #49 | AnalytiCon Plate #14 | G6       | 50        | 0.555                             | 0.0498                                               | 0.568                                                  | 2.5                    |
| Rxn #49 | AnalytiCon Plate #14 | H6: FOC  | -         | 0.560                             | 0.0498                                               | 0.568                                                  | 1.5                    |
| Rxn #49 | AnalytiCon Plate #14 | A7: NFC  | -         | 0.060                             | 0.0498                                               | 0.568                                                  | 98.0                   |
| Rxn #49 | AnalytiCon Plate #14 | B7       | 50        | 0.555                             | 0.0498                                               | 0.568                                                  | 2.5                    |
| Rxn #49 | AnalytiCon Plate #14 | C7       | 50        | 0.481                             | 0.0498                                               | 0.568                                                  | 16.8                   |
| Rxn #49 | AnalytiCon Plate #14 | D7       | 50        | 0.550                             | 0.0498                                               | 0.568                                                  | 3.5                    |
| Rxn #49 | AnalytiCon Plate #14 | E7       | 50        | 0.545                             | 0.0498                                               | 0.568                                                  | 4.4                    |
| Rxn #49 | AnalytiCon Plate #14 | F7       | 50        | 0.559                             | 0.0498                                               | 0.568                                                  | 1.7                    |
| Rxn #49 | AnalytiCon Plate #14 | G7       | 50        | 0.571                             | 0.0498                                               | 0.568                                                  | -0.6                   |
| Rxn #49 | AnalytiCon Plate #14 | H7: FOC  | -         | 0.589                             | 0.0498                                               | 0.568                                                  | -4.1                   |
| Rxn #49 | AnalytiCon Plate #14 | A8: NFC  | -         | 0.050                             | 0.0498                                               | 0.568                                                  | 100.0                  |
| Rxn #49 | AnalytiCon Plate #14 | B8       | 50        | 0.434                             | 0.0498                                               | 0.568                                                  | 25.9                   |
| Rxn #49 | AnalytiCon Plate #14 | C8       | 50        | 0.459                             | 0.0498                                               | 0.568                                                  | 21.0                   |
| Rxn #49 | AnalytiCon Plate #14 | D8       | 50        | 0.547                             | 0.0498                                               | 0.568                                                  | 4.1                    |
| Rxn #49 | AnalytiCon Plate #14 | E8       | 50        | 0.549                             | 0.0498                                               | 0.568                                                  | 3.7                    |
| Rxn #49 | AnalytiCon Plate #14 | F8       | 50        | 0.566                             | 0.0498                                               | 0.568                                                  | 0.4                    |
| Rxn #49 | AnalytiCon Plate #14 | G8       | 50        | 0.547                             | 0.0498                                               | 0.568                                                  | 4.1                    |
| Rxn #49 | AnalytiCon Plate #14 | H8: FOC  | -         | 0.553                             | 0.0498                                               | 0.568                                                  | 2.9                    |
| Rxn #49 | AnalytiCon Plate #14 | A9: NFC  | -         | 0.054                             | 0.0498                                               | 0.568                                                  | 99.2                   |
| Rxn #49 | AnalytiCon Plate #14 | B9       | 50        | 0.538                             | 0.0498                                               | 0.568                                                  | 5.8                    |
| Rxn #49 | AnalytiCon Plate #14 | C9       | 50        | 0.550                             | 0.0498                                               | 0.568                                                  | 3.5                    |
| Rxn #49 | AnalytiCon Plate #14 | D9       | 50        | 0.540                             | 0.0498                                               | 0.568                                                  | 5.4                    |
| Rxn #49 | AnalytiCon Plate #14 | E9       | 50        | 0.532                             | 0.0498                                               | 0.568                                                  | 6.9                    |
| Rxn #49 | AnalytiCon Plate #14 | F9       | 50        | 0.562                             | 0.0498                                               | 0.568                                                  | 1.2                    |
| Rxn #49 | AnalytiCon Plate #14 | G9       | 50        | 0.514                             | 0.0498                                               | 0.568                                                  | 10.4                   |
| Rxn #49 | AnalytiCon Plate #14 | H9: FOC  | -         | 0.541                             | 0.0498                                               | 0.568                                                  | 5.2                    |
| Rxn #49 | AnalytiCon Plate #14 | A10: NFC | -         | 0.056                             | 0.0498                                               | 0.568                                                  | 98.8                   |
| Rxn #49 | AnalytiCon Plate #14 | B10      | 50        | 0.551                             | 0.0498                                               | 0.568                                                  | 3.3                    |
| Rxn #49 | AnalytiCon Plate #14 | C10      | 50        | 0.510                             | 0.0498                                               | 0.568                                                  | 11.2                   |
| Rxn #49 | AnalytiCon Plate #14 | D10      | 50        | 0.551                             | 0.0498                                               | 0.568                                                  | 3.3                    |
| Rxn #49 | AnalytiCon Plate #14 | E10      | 50        | 0.451                             | 0.0498                                               | 0.568                                                  | 22.6                   |
| Rxn #49 | AnalytiCon Plate #14 | F10      | 50        | 0.551                             | 0.0498                                               | 0.568                                                  | 3.3                    |
| Rxn #49 | AnalytiCon Plate #14 | G10      | 50        | 0.556                             | 0.0498                                               | 0.568                                                  | 2.3                    |
| Rxn #49 | AnalytiCon Plate #14 | H10: FOC | -         | 0.527                             | 0.0498                                               | 0.568                                                  | 7.9                    |
| Rxn #49 | AnalytiCon Plate #14 | A11: NFC | -         | 0.053                             | 0.0498                                               | 0.568                                                  | 99.4                   |
| Rxn #49 | AnalytiCon Plate #14 | B11      | 50        | 0.547                             | 0.0498                                               | 0.568                                                  | 4.1                    |
| Rxn #49 | AnalytiCon Plate #14 | C11      | 50        | 0.542                             | 0.0498                                               | 0.568                                                  | 5.0                    |
| Rxn #49 | AnalytiCon Plate #14 | D11      | 50        | 0.568                             | 0.0498                                               | 0.568                                                  | 0.0                    |
| Rxn #49 | AnalytiCon Plate #14 | E11      | 50        | 0.548                             | 0.0498                                               | 0.568                                                  | 3.9                    |
| Rxn #49 | AnalytiCon Plate #14 | F11      | 50        | 0.482                             | 0.0498                                               | 0.568                                                  | 16.6                   |
| Rxn #49 | AnalytiCon Plate #14 | G11      | 50        | 0.513                             | 0.0498                                               | 0.568                                                  | 10.6                   |
| Rxn #49 | AnalytiCon Plate #14 | H11: FOC | -         | 0.536                             | 0.0498                                               | 0.568                                                  | 6.2                    |

**S3 Table. Data from Screening of Phytochemical Library for Inhibition of KHKC Activity.**

| Rxn ID  | Sample               |          |           | Sample<br>( OD <sub>340nm</sub> ) | Ave. No Fructose Controls<br>( OD <sub>340nm</sub> ) | Ave. Fructose Only Controls<br>( OD <sub>340nm</sub> ) | KHKC<br>Inhibition (%) |
|---------|----------------------|----------|-----------|-----------------------------------|------------------------------------------------------|--------------------------------------------------------|------------------------|
|         | Phytochemical Plate  | Well     | Conc (µM) |                                   |                                                      |                                                        |                        |
| Rxn #49 | AnalytiCon Plate #14 | A12: NFC | -         | 0.055                             | 0.0498                                               | 0.568                                                  | 99.0                   |
| Rxn #49 | AnalytiCon Plate #14 | H12: FOC | -         | 0.535                             | 0.0498                                               | 0.568                                                  | 6.4                    |
| Rxn #50 | AnalytiCon Plate #15 | A1: NFC  | -         | 0.079                             | 0.0741                                               | 0.628                                                  | 99.1                   |
| Rxn #50 | AnalytiCon Plate #15 | B1       | 50        | 0.540                             | 0.0741                                               | 0.628                                                  | 15.9                   |
| Rxn #50 | AnalytiCon Plate #15 | C1       | 50        | 0.571                             | 0.0741                                               | 0.628                                                  | 10.3                   |
| Rxn #50 | AnalytiCon Plate #15 | D1       | 50        | 0.543                             | 0.0741                                               | 0.628                                                  | 15.3                   |
| Rxn #50 | AnalytiCon Plate #15 | E1       | 50        | 0.589                             | 0.0741                                               | 0.628                                                  | 7.0                    |
| Rxn #50 | AnalytiCon Plate #15 | F1       | 50        | 0.581                             | 0.0741                                               | 0.628                                                  | 8.5                    |
| Rxn #50 | AnalytiCon Plate #15 | G1       | 50        | 0.595                             | 0.0741                                               | 0.628                                                  | 6.0                    |
| Rxn #50 | AnalytiCon Plate #15 | H1: FOC  | -         | 0.563                             | 0.0741                                               | 0.628                                                  | 11.7                   |
| Rxn #50 | AnalytiCon Plate #15 | A2: NFC  | -         | 0.078                             | 0.0741                                               | 0.628                                                  | 99.3                   |
| Rxn #50 | AnalytiCon Plate #15 | B2       | 50        | 0.626                             | 0.0741                                               | 0.628                                                  | 0.4                    |
| Rxn #50 | AnalytiCon Plate #15 | C2       | 50        | 0.604                             | 0.0741                                               | 0.628                                                  | 4.3                    |
| Rxn #50 | AnalytiCon Plate #15 | D2       | 50        | 0.592                             | 0.0741                                               | 0.628                                                  | 6.5                    |
| Rxn #50 | AnalytiCon Plate #15 | E2       | 50        | 0.600                             | 0.0741                                               | 0.628                                                  | 5.1                    |
| Rxn #50 | AnalytiCon Plate #15 | F2       | 50        | 0.540                             | 0.0741                                               | 0.628                                                  | 15.9                   |
| Rxn #50 | AnalytiCon Plate #15 | G2       | 50        | 0.599                             | 0.0741                                               | 0.628                                                  | 5.2                    |
| Rxn #50 | AnalytiCon Plate #15 | H2: FOC  | -         | 0.620                             | 0.0741                                               | 0.628                                                  | 1.4                    |
| Rxn #50 | AnalytiCon Plate #15 | A3: NFC  | -         | 0.093                             | 0.0741                                               | 0.628                                                  | 96.6                   |
| Rxn #50 | AnalytiCon Plate #15 | B3       | 50        | 0.594                             | 0.0741                                               | 0.628                                                  | 6.1                    |
| Rxn #50 | AnalytiCon Plate #15 | C3       | 50        | 0.584                             | 0.0741                                               | 0.628                                                  | 7.9                    |
| Rxn #50 | AnalytiCon Plate #15 | D3       | 50        | 0.609                             | 0.0741                                               | 0.628                                                  | 3.4                    |
| Rxn #50 | AnalytiCon Plate #15 | E3       | 50        | 0.570                             | 0.0741                                               | 0.628                                                  | 10.5                   |
| Rxn #50 | AnalytiCon Plate #15 | F3       | 50        | 0.569                             | 0.0741                                               | 0.628                                                  | 10.7                   |
| Rxn #50 | AnalytiCon Plate #15 | G3       | 50        | 0.619                             | 0.0741                                               | 0.628                                                  | 1.6                    |
| Rxn #50 | AnalytiCon Plate #15 | H3: FOC  | -         | 0.640                             | 0.0741                                               | 0.628                                                  | -2.2                   |
| Rxn #50 | AnalytiCon Plate #15 | A4: NFC  | -         | 0.082                             | 0.0741                                               | 0.628                                                  | 98.6                   |
| Rxn #50 | AnalytiCon Plate #15 | B4       | 50        | 0.625                             | 0.0741                                               | 0.628                                                  | 0.5                    |
| Rxn #50 | AnalytiCon Plate #15 | C4       | 50        | 0.620                             | 0.0741                                               | 0.628                                                  | 1.4                    |
| Rxn #50 | AnalytiCon Plate #15 | D4       | 50        | 0.621                             | 0.0741                                               | 0.628                                                  | 1.3                    |
| Rxn #50 | AnalytiCon Plate #15 | E4       | 50        | 0.625                             | 0.0741                                               | 0.628                                                  | 0.5                    |
| Rxn #50 | AnalytiCon Plate #15 | F4       | 50        | 0.618                             | 0.0741                                               | 0.628                                                  | 1.8                    |
| Rxn #50 | AnalytiCon Plate #15 | G4       | 50        | 0.620                             | 0.0741                                               | 0.628                                                  | 1.4                    |
| Rxn #50 | AnalytiCon Plate #15 | H4: FOC  | -         | 0.646                             | 0.0741                                               | 0.628                                                  | -3.2                   |
| Rxn #50 | AnalytiCon Plate #15 | A5: NFC  | -         | 0.084                             | 0.0741                                               | 0.628                                                  | 98.2                   |
| Rxn #50 | AnalytiCon Plate #15 | B5: NFC  | -         | 0.072                             | 0.0741                                               | 0.628                                                  | 100.4                  |
| Rxn #50 | AnalytiCon Plate #15 | C5: NFC  | -         | 0.072                             | 0.0741                                               | 0.628                                                  | 100.4                  |
| Rxn #50 | AnalytiCon Plate #15 | D5: NFC  | -         | 0.072                             | 0.0741                                               | 0.628                                                  | 100.4                  |
| Rxn #50 | AnalytiCon Plate #15 | E5: FOC  | -         | 0.622                             | 0.0741                                               | 0.628                                                  | 1.1                    |
| Rxn #50 | AnalytiCon Plate #15 | F5: FOC  | -         | 0.626                             | 0.0741                                               | 0.628                                                  | 0.4                    |
| Rxn #50 | AnalytiCon Plate #15 | G5: FOC  | -         | 0.656                             | 0.0741                                               | 0.628                                                  | -5.1                   |
| Rxn #50 | AnalytiCon Plate #15 | H5: FOC  | -         | 0.638                             | 0.0741                                               | 0.628                                                  | -1.8                   |
| Rxn #50 | AnalytiCon Plate #15 | A6: NFC  | -         | 0.069                             | 0.0741                                               | 0.628                                                  | 100.9                  |
| Rxn #50 | AnalytiCon Plate #15 | B6       | 50        | 0.606                             | 0.0741                                               | 0.628                                                  | 4.0                    |
| Rxn #50 | AnalytiCon Plate #15 | C6       | 50        | 0.614                             | 0.0741                                               | 0.628                                                  | 2.5                    |
| Rxn #50 | AnalytiCon Plate #15 | D6       | 50        | 0.613                             | 0.0741                                               | 0.628                                                  | 2.7                    |
| Rxn #50 | AnalytiCon Plate #15 | E6       | 50        | 0.602                             | 0.0741                                               | 0.628                                                  | 4.7                    |
| Rxn #50 | AnalytiCon Plate #15 | F6       | 50        | 0.586                             | 0.0741                                               | 0.628                                                  | 7.6                    |
| Rxn #50 | AnalytiCon Plate #15 | G6       | 50        | 0.608                             | 0.0741                                               | 0.628                                                  | 3.6                    |
| Rxn #50 | AnalytiCon Plate #15 | H6: FOC  | -         | 0.620                             | 0.0741                                               | 0.628                                                  | 1.4                    |
| Rxn #50 | AnalytiCon Plate #15 | A7: NFC  | -         | 0.072                             | 0.0741                                               | 0.628                                                  | 100.4                  |
| Rxn #50 | AnalytiCon Plate #15 | B7       | 50        | 0.564                             | 0.0741                                               | 0.628                                                  | 11.6                   |
| Rxn #50 | AnalytiCon Plate #15 | C7       | 50        | 0.623                             | 0.0741                                               | 0.628                                                  | 0.9                    |
| Rxn #50 | AnalytiCon Plate #15 | D7       | 50        | 0.553                             | 0.0741                                               | 0.628                                                  | 13.5                   |
| Rxn #50 | AnalytiCon Plate #15 | E7       | 50        | 0.631                             | 0.0741                                               | 0.628                                                  | -0.5                   |
| Rxn #50 | AnalytiCon Plate #15 | F7       | 50        | 0.622                             | 0.0741                                               | 0.628                                                  | 1.1                    |
| Rxn #50 | AnalytiCon Plate #15 | G7       | 50        | 0.624                             | 0.0741                                               | 0.628                                                  | 0.7                    |
| Rxn #50 | AnalytiCon Plate #15 | H7: FOC  | -         | 0.648                             | 0.0741                                               | 0.628                                                  | -3.6                   |
| Rxn #50 | AnalytiCon Plate #15 | A8: NFC  | -         | 0.065                             | 0.0741                                               | 0.628                                                  | 101.6                  |
| Rxn #50 | AnalytiCon Plate #15 | B8       | 50        | 0.622                             | 0.0741                                               | 0.628                                                  | 1.1                    |
| Rxn #50 | AnalytiCon Plate #15 | C8       | 50        | 0.625                             | 0.0741                                               | 0.628                                                  | 0.5                    |
| Rxn #50 | AnalytiCon Plate #15 | D8       | 50        | 0.635                             | 0.0741                                               | 0.628                                                  | -1.3                   |
| Rxn #50 | AnalytiCon Plate #15 | E8       | 50        | 0.629                             | 0.0741                                               | 0.628                                                  | -0.2                   |
| Rxn #50 | AnalytiCon Plate #15 | F8       | 50        | 0.633                             | 0.0741                                               | 0.628                                                  | -0.9                   |
| Rxn #50 | AnalytiCon Plate #15 | G8       | 50        | 0.612                             | 0.0741                                               | 0.628                                                  | 2.9                    |
| Rxn #50 | AnalytiCon Plate #15 | H8: FOC  | -         | 0.651                             | 0.0741                                               | 0.628                                                  | -4.2                   |
| Rxn #50 | AnalytiCon Plate #15 | A9: NFC  | -         | 0.075                             | 0.0741                                               | 0.628                                                  | 99.8                   |
| Rxn #50 | AnalytiCon Plate #15 | B9       | 50        | 0.574                             | 0.0741                                               | 0.628                                                  | 9.7                    |
| Rxn #50 | AnalytiCon Plate #15 | C9       | 50        | 0.651                             | 0.0741                                               | 0.628                                                  | -4.2                   |
| Rxn #50 | AnalytiCon Plate #15 | D9       | 50        | 0.617                             | 0.0741                                               | 0.628                                                  | 2.0                    |
| Rxn #50 | AnalytiCon Plate #15 | E9       | 50        | 0.630                             | 0.0741                                               | 0.628                                                  | -0.4                   |
| Rxn #50 | AnalytiCon Plate #15 | F9       | 50        | 0.630                             | 0.0741                                               | 0.628                                                  | -0.4                   |
| Rxn #50 | AnalytiCon Plate #15 | G9       | 50        | 0.636                             | 0.0741                                               | 0.628                                                  | -1.4                   |
| Rxn #50 | AnalytiCon Plate #15 | H9: FOC  | -         | 0.650                             | 0.0741                                               | 0.628                                                  | -4.0                   |

**S3 Table. Data from Screening of Phytochemical Library for Inhibition of KHKC Activity.**

| Rxn ID  | Sample               |          |           | Sample<br>( OD <sub>340nm</sub> ) | Ave. No Fructose Controls<br>( OD <sub>340nm</sub> ) | Ave. Fructose Only Controls<br>( OD <sub>340nm</sub> ) | KHKC<br>Inhibition (%) |
|---------|----------------------|----------|-----------|-----------------------------------|------------------------------------------------------|--------------------------------------------------------|------------------------|
|         | Phytochemical Plate  | Well     | Conc (µM) |                                   |                                                      |                                                        |                        |
| Rxn #50 | AnalytiCon Plate #15 | A10: NFC | -         | 0.067                             | 0.0741                                               | 0.628                                                  | 101.3                  |
| Rxn #50 | AnalytiCon Plate #15 | B10      | 50        | 0.524                             | 0.0741                                               | 0.628                                                  | 18.8                   |
| Rxn #50 | AnalytiCon Plate #15 | C10      | 50        | 0.623                             | 0.0741                                               | 0.628                                                  | 0.9                    |
| Rxn #50 | AnalytiCon Plate #15 | D10      | 50        | 0.622                             | 0.0741                                               | 0.628                                                  | 1.1                    |
| Rxn #50 | AnalytiCon Plate #15 | E10      | 50        | 0.623                             | 0.0741                                               | 0.628                                                  | 0.9                    |
| Rxn #50 | AnalytiCon Plate #15 | F10      | 50        | 0.607                             | 0.0741                                               | 0.628                                                  | 3.8                    |
| Rxn #50 | AnalytiCon Plate #15 | G10      | 50        | 0.605                             | 0.0741                                               | 0.628                                                  | 4.2                    |
| Rxn #50 | AnalytiCon Plate #15 | H10: FOC | -         | 0.636                             | 0.0741                                               | 0.628                                                  | -1.4                   |
| Rxn #50 | AnalytiCon Plate #15 | A11: NFC | -         | 0.072                             | 0.0741                                               | 0.628                                                  | 100.4                  |
| Rxn #50 | AnalytiCon Plate #15 | B11      | 50        | 0.633                             | 0.0741                                               | 0.628                                                  | -0.9                   |
| Rxn #50 | AnalytiCon Plate #15 | C11      | 50        | 0.636                             | 0.0741                                               | 0.628                                                  | -1.4                   |
| Rxn #50 | AnalytiCon Plate #15 | D11      | 50        | 0.632                             | 0.0741                                               | 0.628                                                  | -0.7                   |
| Rxn #50 | AnalytiCon Plate #15 | E11      | 50        | 0.626                             | 0.0741                                               | 0.628                                                  | 0.4                    |
| Rxn #50 | AnalytiCon Plate #15 | F11      | 50        | 0.627                             | 0.0741                                               | 0.628                                                  | 0.2                    |
| Rxn #50 | AnalytiCon Plate #15 | G11      | 50        | 0.663                             | 0.0741                                               | 0.628                                                  | -6.3                   |
| Rxn #50 | AnalytiCon Plate #15 | H11: FOC | -         | 0.640                             | 0.0741                                               | 0.628                                                  | -2.2                   |
| Rxn #50 | AnalytiCon Plate #15 | A12: NFC | -         | 0.059                             | 0.0741                                               | 0.628                                                  | 102.7                  |
| Rxn #50 | AnalytiCon Plate #15 | H12: FOC | -         | 0.636                             | 0.0741                                               | 0.628                                                  | -1.4                   |
| Rxn #51 | AnalytiCon Plate #16 | A1: NFC  | -         | 0.103                             | 0.0833                                               | 0.632                                                  | 96.4                   |
| Rxn #51 | AnalytiCon Plate #16 | B1       | 50        | 0.590                             | 0.0833                                               | 0.632                                                  | 7.7                    |
| Rxn #51 | AnalytiCon Plate #16 | C1       | 50        | 0.546                             | 0.0833                                               | 0.632                                                  | 15.7                   |
| Rxn #51 | AnalytiCon Plate #16 | D1       | 50        | 0.645                             | 0.0833                                               | 0.632                                                  | -2.4                   |
| Rxn #51 | AnalytiCon Plate #16 | E1       | 50        | 0.635                             | 0.0833                                               | 0.632                                                  | -0.5                   |
| Rxn #51 | AnalytiCon Plate #16 | F1       | 50        | 0.626                             | 0.0833                                               | 0.632                                                  | 1.1                    |
| Rxn #51 | AnalytiCon Plate #16 | G1       | 50        | 0.650                             | 0.0833                                               | 0.632                                                  | -3.3                   |
| Rxn #51 | AnalytiCon Plate #16 | H1: FOC  | -         | 0.642                             | 0.0833                                               | 0.632                                                  | -1.8                   |
| Rxn #51 | AnalytiCon Plate #16 | A2: NFC  | -         | 0.095                             | 0.0833                                               | 0.632                                                  | 97.9                   |
| Rxn #51 | AnalytiCon Plate #16 | B2       | 50        | 0.644                             | 0.0833                                               | 0.632                                                  | -2.2                   |
| Rxn #51 | AnalytiCon Plate #16 | C2       | 50        | 0.622                             | 0.0833                                               | 0.632                                                  | 1.8                    |
| Rxn #51 | AnalytiCon Plate #16 | D2       | 50        | 0.651                             | 0.0833                                               | 0.632                                                  | -3.5                   |
| Rxn #51 | AnalytiCon Plate #16 | E2       | 50        | 0.642                             | 0.0833                                               | 0.632                                                  | -1.8                   |
| Rxn #51 | AnalytiCon Plate #16 | F2       | 50        | 0.609                             | 0.0833                                               | 0.632                                                  | 4.2                    |
| Rxn #51 | AnalytiCon Plate #16 | G2       | 50        | 0.629                             | 0.0833                                               | 0.632                                                  | 0.5                    |
| Rxn #51 | AnalytiCon Plate #16 | H2: FOC  | -         | 0.618                             | 0.0833                                               | 0.632                                                  | 2.6                    |
| Rxn #51 | AnalytiCon Plate #16 | A3: NFC  | -         | 0.116                             | 0.0833                                               | 0.632                                                  | 94.0                   |
| Rxn #51 | AnalytiCon Plate #16 | B3       | 50        | 0.577                             | 0.0833                                               | 0.632                                                  | 10.0                   |
| Rxn #51 | AnalytiCon Plate #16 | C3       | 50        | 0.608                             | 0.0833                                               | 0.632                                                  | 4.4                    |
| Rxn #51 | AnalytiCon Plate #16 | D3       | 50        | 0.612                             | 0.0833                                               | 0.632                                                  | 3.6                    |
| Rxn #51 | AnalytiCon Plate #16 | E3       | 50        | 0.614                             | 0.0833                                               | 0.632                                                  | 3.3                    |
| Rxn #51 | AnalytiCon Plate #16 | F3       | 50        | 0.557                             | 0.0833                                               | 0.632                                                  | 13.7                   |
| Rxn #51 | AnalytiCon Plate #16 | G3       | 50        | 0.608                             | 0.0833                                               | 0.632                                                  | 4.4                    |
| Rxn #51 | AnalytiCon Plate #16 | H3: FOC  | -         | 0.629                             | 0.0833                                               | 0.632                                                  | 0.5                    |
| Rxn #51 | AnalytiCon Plate #16 | A4: NFC  | -         | 0.106                             | 0.0833                                               | 0.632                                                  | 95.9                   |
| Rxn #51 | AnalytiCon Plate #16 | B4       | 50        | 0.619                             | 0.0833                                               | 0.632                                                  | 2.4                    |
| Rxn #51 | AnalytiCon Plate #16 | C4       | 50        | 0.574                             | 0.0833                                               | 0.632                                                  | 10.6                   |
| Rxn #51 | AnalytiCon Plate #16 | D4       | 50        | 0.600                             | 0.0833                                               | 0.632                                                  | 5.8                    |
| Rxn #51 | AnalytiCon Plate #16 | E4       | 50        | 0.624                             | 0.0833                                               | 0.632                                                  | 1.5                    |
| Rxn #51 | AnalytiCon Plate #16 | F4       | 50        | 0.606                             | 0.0833                                               | 0.632                                                  | 4.7                    |
| Rxn #51 | AnalytiCon Plate #16 | G4       | 50        | 0.607                             | 0.0833                                               | 0.632                                                  | 4.6                    |
| Rxn #51 | AnalytiCon Plate #16 | H4: FOC  | -         | 0.634                             | 0.0833                                               | 0.632                                                  | -0.4                   |
| Rxn #51 | AnalytiCon Plate #16 | A5: NFC  | -         | 0.117                             | 0.0833                                               | 0.632                                                  | 93.9                   |
| Rxn #51 | AnalytiCon Plate #16 | B5: NFC  | -         | 0.071                             | 0.0833                                               | 0.632                                                  | 102.2                  |
| Rxn #51 | AnalytiCon Plate #16 | C5: NFC  | -         | 0.073                             | 0.0833                                               | 0.632                                                  | 101.9                  |
| Rxn #51 | AnalytiCon Plate #16 | D5: NFC  | -         | 0.067                             | 0.0833                                               | 0.632                                                  | 103.0                  |
| Rxn #51 | AnalytiCon Plate #16 | E5: FOC  | -         | 0.635                             | 0.0833                                               | 0.632                                                  | -0.5                   |
| Rxn #51 | AnalytiCon Plate #16 | F5: FOC  | -         | 0.635                             | 0.0833                                               | 0.632                                                  | -0.5                   |
| Rxn #51 | AnalytiCon Plate #16 | G5: FOC  | -         | 0.634                             | 0.0833                                               | 0.632                                                  | -0.4                   |
| Rxn #51 | AnalytiCon Plate #16 | H5: FOC  | -         | 0.637                             | 0.0833                                               | 0.632                                                  | -0.9                   |
| Rxn #51 | AnalytiCon Plate #16 | A6: NFC  | -         | 0.070                             | 0.0833                                               | 0.632                                                  | 102.4                  |
| Rxn #51 | AnalytiCon Plate #16 | B6       | 50        | 0.620                             | 0.0833                                               | 0.632                                                  | 2.2                    |
| Rxn #51 | AnalytiCon Plate #16 | C6       | 50        | 0.577                             | 0.0833                                               | 0.632                                                  | 10.0                   |
| Rxn #51 | AnalytiCon Plate #16 | D6       | 50        | 0.619                             | 0.0833                                               | 0.632                                                  | 2.4                    |
| Rxn #51 | AnalytiCon Plate #16 | E6       | 50        | 0.635                             | 0.0833                                               | 0.632                                                  | -0.5                   |
| Rxn #51 | AnalytiCon Plate #16 | F6       | 50        | 0.651                             | 0.0833                                               | 0.632                                                  | -3.5                   |
| Rxn #51 | AnalytiCon Plate #16 | G6       | 50        | 0.628                             | 0.0833                                               | 0.632                                                  | 0.7                    |
| Rxn #51 | AnalytiCon Plate #16 | H6: FOC  | -         | 0.639                             | 0.0833                                               | 0.632                                                  | -1.3                   |
| Rxn #51 | AnalytiCon Plate #16 | A7: NFC  | -         | 0.087                             | 0.0833                                               | 0.632                                                  | 99.3                   |
| Rxn #51 | AnalytiCon Plate #16 | B7       | 50        | 0.604                             | 0.0833                                               | 0.632                                                  | 5.1                    |
| Rxn #51 | AnalytiCon Plate #16 | C7       | 50        | 0.628                             | 0.0833                                               | 0.632                                                  | 0.7                    |
| Rxn #51 | AnalytiCon Plate #16 | D7       | 50        | 0.651                             | 0.0833                                               | 0.632                                                  | -3.5                   |
| Rxn #51 | AnalytiCon Plate #16 | E7       | 50        | 0.650                             | 0.0833                                               | 0.632                                                  | -3.3                   |
| Rxn #51 | AnalytiCon Plate #16 | F7       | 50        | 0.611                             | 0.0833                                               | 0.632                                                  | 3.8                    |
| Rxn #51 | AnalytiCon Plate #16 | G7       | 50        | 0.632                             | 0.0833                                               | 0.632                                                  | 0.0                    |
| Rxn #51 | AnalytiCon Plate #16 | H7: FOC  | -         | 0.614                             | 0.0833                                               | 0.632                                                  | 3.3                    |

**S3 Table. Data from Screening of Phytochemical Library for Inhibition of KHKC Activity.**

| Rxn ID  | Sample               |          |           | Sample<br>( OD <sub>340nm</sub> ) | Ave. No Fructose Controls<br>( OD <sub>340nm</sub> ) | Ave. Fructose Only Controls<br>( OD <sub>340nm</sub> ) | KHKC<br>Inhibition (%) |
|---------|----------------------|----------|-----------|-----------------------------------|------------------------------------------------------|--------------------------------------------------------|------------------------|
|         | Phytochemical Plate  | Well     | Conc (µM) |                                   |                                                      |                                                        |                        |
| Rxn #51 | AnalytiCon Plate #16 | A8: NFC  | -         | 0.079                             | 0.0833                                               | 0.632                                                  | 100.8                  |
| Rxn #51 | AnalytiCon Plate #16 | B8       | 50        | 0.609                             | 0.0833                                               | 0.632                                                  | 4.2                    |
| Rxn #51 | AnalytiCon Plate #16 | C8       | 50        | 0.644                             | 0.0833                                               | 0.632                                                  | -2.2                   |
| Rxn #51 | AnalytiCon Plate #16 | D8       | 50        | 0.542                             | 0.0833                                               | 0.632                                                  | 16.4                   |
| Rxn #51 | AnalytiCon Plate #16 | E8       | 50        | 0.604                             | 0.0833                                               | 0.632                                                  | 5.1                    |
| Rxn #51 | AnalytiCon Plate #16 | F8       | 50        | 0.616                             | 0.0833                                               | 0.632                                                  | 2.9                    |
| Rxn #51 | AnalytiCon Plate #16 | G8       | 50        | 0.633                             | 0.0833                                               | 0.632                                                  | -0.2                   |
| Rxn #51 | AnalytiCon Plate #16 | H8: FOC  | -         | 0.634                             | 0.0833                                               | 0.632                                                  | -0.4                   |
| Rxn #51 | AnalytiCon Plate #16 | A9: NFC  | -         | 0.063                             | 0.0833                                               | 0.632                                                  | 103.7                  |
| Rxn #51 | AnalytiCon Plate #16 | B9       | 50        | 0.659                             | 0.0833                                               | 0.632                                                  | -4.9                   |
| Rxn #51 | AnalytiCon Plate #16 | C9       | 50        | 0.619                             | 0.0833                                               | 0.632                                                  | 2.4                    |
| Rxn #51 | AnalytiCon Plate #16 | D9       | 50        | 0.653                             | 0.0833                                               | 0.632                                                  | -3.8                   |
| Rxn #51 | AnalytiCon Plate #16 | E9       | 50        | 0.592                             | 0.0833                                               | 0.632                                                  | 7.3                    |
| Rxn #51 | AnalytiCon Plate #16 | F9       | 50        | 0.633                             | 0.0833                                               | 0.632                                                  | -0.2                   |
| Rxn #51 | AnalytiCon Plate #16 | G9       | 50        | 0.618                             | 0.0833                                               | 0.632                                                  | 2.6                    |
| Rxn #51 | AnalytiCon Plate #16 | H9: FOC  | -         | 0.655                             | 0.0833                                               | 0.632                                                  | -4.2                   |
| Rxn #51 | AnalytiCon Plate #16 | A10: NFC | -         | 0.070                             | 0.0833                                               | 0.632                                                  | 102.4                  |
| Rxn #51 | AnalytiCon Plate #16 | B10      | 50        | 0.579                             | 0.0833                                               | 0.632                                                  | 9.7                    |
| Rxn #51 | AnalytiCon Plate #16 | C10      | 50        | 0.621                             | 0.0833                                               | 0.632                                                  | 2.0                    |
| Rxn #51 | AnalytiCon Plate #16 | D10      | 50        | 0.612                             | 0.0833                                               | 0.632                                                  | 3.6                    |
| Rxn #51 | AnalytiCon Plate #16 | E10      | 50        | 0.639                             | 0.0833                                               | 0.632                                                  | -1.3                   |
| Rxn #51 | AnalytiCon Plate #16 | F10      | 50        | 0.621                             | 0.0833                                               | 0.632                                                  | 2.0                    |
| Rxn #51 | AnalytiCon Plate #16 | G10      | 50        | 0.616                             | 0.0833                                               | 0.632                                                  | 2.9                    |
| Rxn #51 | AnalytiCon Plate #16 | H10: FOC | -         | 0.598                             | 0.0833                                               | 0.632                                                  | 6.2                    |
| Rxn #51 | AnalytiCon Plate #16 | A11: NFC | -         | 0.068                             | 0.0833                                               | 0.632                                                  | 102.8                  |
| Rxn #51 | AnalytiCon Plate #16 | B11      | 50        | 0.604                             | 0.0833                                               | 0.632                                                  | 5.1                    |
| Rxn #51 | AnalytiCon Plate #16 | C11      | 50        | 0.595                             | 0.0833                                               | 0.632                                                  | 6.7                    |
| Rxn #51 | AnalytiCon Plate #16 | D11      | 50        | 0.626                             | 0.0833                                               | 0.632                                                  | 1.1                    |
| Rxn #51 | AnalytiCon Plate #16 | E11      | 50        | 0.583                             | 0.0833                                               | 0.632                                                  | 8.9                    |
| Rxn #51 | AnalytiCon Plate #16 | F11      | 50        | 0.622                             | 0.0833                                               | 0.632                                                  | 1.8                    |
| Rxn #51 | AnalytiCon Plate #16 | G11      | 50        | 0.635                             | 0.0833                                               | 0.632                                                  | -0.5                   |
| Rxn #51 | AnalytiCon Plate #16 | H11: FOC | -         | 0.603                             | 0.0833                                               | 0.632                                                  | 5.3                    |
| Rxn #51 | AnalytiCon Plate #16 | A12: NFC | -         | 0.065                             | 0.0833                                               | 0.632                                                  | 103.3                  |
| Rxn #51 | AnalytiCon Plate #16 | H12: FOC | -         | 0.577                             | 0.0833                                               | 0.632                                                  | 10.0                   |
| Rxn #52 | AnalytiCon Plate #17 | A1: NFC  | -         | 0.068                             | 0.0598                                               | 0.561                                                  | 98.4                   |
| Rxn #52 | AnalytiCon Plate #17 | B1       | 50        | 0.509                             | 0.0598                                               | 0.561                                                  | 10.4                   |
| Rxn #52 | AnalytiCon Plate #17 | C1       | 50        | 0.465                             | 0.0598                                               | 0.561                                                  | 19.2                   |
| Rxn #52 | AnalytiCon Plate #17 | D1       | 50        | 0.522                             | 0.0598                                               | 0.561                                                  | 7.8                    |
| Rxn #52 | AnalytiCon Plate #17 | E1       | 50        | 0.519                             | 0.0598                                               | 0.561                                                  | 8.4                    |
| Rxn #52 | AnalytiCon Plate #17 | F1       | 50        | 0.535                             | 0.0598                                               | 0.561                                                  | 5.2                    |
| Rxn #52 | AnalytiCon Plate #17 | G1       | 50        | 0.520                             | 0.0598                                               | 0.561                                                  | 8.2                    |
| Rxn #52 | AnalytiCon Plate #17 | H1: FOC  | -         | 0.524                             | 0.0598                                               | 0.561                                                  | 7.4                    |
| Rxn #52 | AnalytiCon Plate #17 | A2: NFC  | -         | 0.070                             | 0.0598                                               | 0.561                                                  | 98.0                   |
| Rxn #52 | AnalytiCon Plate #17 | B2       | 50        | 0.573                             | 0.0598                                               | 0.561                                                  | -2.4                   |
| Rxn #52 | AnalytiCon Plate #17 | C2       | 50        | 0.499                             | 0.0598                                               | 0.561                                                  | 12.4                   |
| Rxn #52 | AnalytiCon Plate #17 | D2       | 50        | 0.559                             | 0.0598                                               | 0.561                                                  | 0.4                    |
| Rxn #52 | AnalytiCon Plate #17 | E2       | 50        | 0.512                             | 0.0598                                               | 0.561                                                  | 9.8                    |
| Rxn #52 | AnalytiCon Plate #17 | F2       | 50        | 0.547                             | 0.0598                                               | 0.561                                                  | 2.8                    |
| Rxn #52 | AnalytiCon Plate #17 | G2       | 50        | 0.405                             | 0.0598                                               | 0.561                                                  | 31.1                   |
| Rxn #52 | AnalytiCon Plate #17 | H2: FOC  | -         | 0.556                             | 0.0598                                               | 0.561                                                  | 1.0                    |
| Rxn #52 | AnalytiCon Plate #17 | A3: NFC  | -         | 0.064                             | 0.0598                                               | 0.561                                                  | 99.2                   |
| Rxn #52 | AnalytiCon Plate #17 | B3       | 50        | 0.565                             | 0.0598                                               | 0.561                                                  | -0.8                   |
| Rxn #52 | AnalytiCon Plate #17 | C3       | 50        | 0.503                             | 0.0598                                               | 0.561                                                  | 11.6                   |
| Rxn #52 | AnalytiCon Plate #17 | D3       | 50        | 0.539                             | 0.0598                                               | 0.561                                                  | 4.4                    |
| Rxn #52 | AnalytiCon Plate #17 | E3       | 50        | 0.550                             | 0.0598                                               | 0.561                                                  | 2.2                    |
| Rxn #52 | AnalytiCon Plate #17 | F3       | 50        | 0.562                             | 0.0598                                               | 0.561                                                  | -0.2                   |
| Rxn #52 | AnalytiCon Plate #17 | G3       | 50        | 0.458                             | 0.0598                                               | 0.561                                                  | 20.6                   |
| Rxn #52 | AnalytiCon Plate #17 | H3: FOC  | -         | 0.565                             | 0.0598                                               | 0.561                                                  | -0.8                   |
| Rxn #52 | AnalytiCon Plate #17 | A4: NFC  | -         | 0.064                             | 0.0598                                               | 0.561                                                  | 99.2                   |
| Rxn #52 | AnalytiCon Plate #17 | B4       | 50        | 0.474                             | 0.0598                                               | 0.561                                                  | 17.4                   |
| Rxn #52 | AnalytiCon Plate #17 | C4       | 50        | 0.454                             | 0.0598                                               | 0.561                                                  | 21.3                   |
| Rxn #52 | AnalytiCon Plate #17 | D4       | 50        | 0.533                             | 0.0598                                               | 0.561                                                  | 5.6                    |
| Rxn #52 | AnalytiCon Plate #17 | E4       | 50        | 0.563                             | 0.0598                                               | 0.561                                                  | -0.4                   |
| Rxn #52 | AnalytiCon Plate #17 | F4       | 50        | 0.551                             | 0.0598                                               | 0.561                                                  | 2.0                    |
| Rxn #52 | AnalytiCon Plate #17 | G4       | 50        | 0.553                             | 0.0598                                               | 0.561                                                  | 1.6                    |
| Rxn #52 | AnalytiCon Plate #17 | H4: FOC  | -         | 0.574                             | 0.0598                                               | 0.561                                                  | -2.6                   |
| Rxn #52 | AnalytiCon Plate #17 | A5: NFC  | -         | 0.054                             | 0.0598                                               | 0.561                                                  | 101.2                  |
| Rxn #52 | AnalytiCon Plate #17 | B5: NFC  | -         | 0.063                             | 0.0598                                               | 0.561                                                  | 99.4                   |
| Rxn #52 | AnalytiCon Plate #17 | C5: NFC  | -         | 0.052                             | 0.0598                                               | 0.561                                                  | 101.6                  |
| Rxn #52 | AnalytiCon Plate #17 | D5: NFC  | -         | 0.061                             | 0.0598                                               | 0.561                                                  | 99.8                   |
| Rxn #52 | AnalytiCon Plate #17 | E5: FOC  | -         | 0.575                             | 0.0598                                               | 0.561                                                  | -2.8                   |
| Rxn #52 | AnalytiCon Plate #17 | F5: FOC  | -         | 0.570                             | 0.0598                                               | 0.561                                                  | -1.8                   |
| Rxn #52 | AnalytiCon Plate #17 | G5: FOC  | -         | 0.562                             | 0.0598                                               | 0.561                                                  | -0.2                   |
| Rxn #52 | AnalytiCon Plate #17 | H5: FOC  | -         | 0.564                             | 0.0598                                               | 0.561                                                  | -0.6                   |

**S3 Table. Data from Screening of Phytochemical Library for Inhibition of KHKC Activity.**

| Rxn ID  | Sample               |          |           | Sample<br>( OD <sub>340nm</sub> ) | Ave. No Fructose Controls<br>( OD <sub>340nm</sub> ) | Ave. Fructose Only Controls<br>( OD <sub>340nm</sub> ) | KHKC<br>Inhibition (%) |
|---------|----------------------|----------|-----------|-----------------------------------|------------------------------------------------------|--------------------------------------------------------|------------------------|
|         | Phytochemical Plate  | Well     | Conc (µM) |                                   |                                                      |                                                        |                        |
| Rxn #52 | AnalytiCon Plate #17 | A6: NFC  | -         | 0.060                             | 0.0598                                               | 0.561                                                  | 100.0                  |
| Rxn #52 | AnalytiCon Plate #17 | B6       | 50        | 0.573                             | 0.0598                                               | 0.561                                                  | -2.4                   |
| Rxn #52 | AnalytiCon Plate #17 | C6       | 50        | 0.496                             | 0.0598                                               | 0.561                                                  | 13.0                   |
| Rxn #52 | AnalytiCon Plate #17 | D6       | 50        | 0.408                             | 0.0598                                               | 0.561                                                  | 30.5                   |
| Rxn #52 | AnalytiCon Plate #17 | E6       | 50        | 0.519                             | 0.0598                                               | 0.561                                                  | 8.4                    |
| Rxn #52 | AnalytiCon Plate #17 | F6       | 50        | 0.585                             | 0.0598                                               | 0.561                                                  | -4.8                   |
| Rxn #52 | AnalytiCon Plate #17 | G6       | 50        | 0.545                             | 0.0598                                               | 0.561                                                  | 3.2                    |
| Rxn #52 | AnalytiCon Plate #17 | H6: FOC  | -         | 0.564                             | 0.0598                                               | 0.561                                                  | -0.6                   |
| Rxn #52 | AnalytiCon Plate #17 | A7: NFC  | -         | 0.062                             | 0.0598                                               | 0.561                                                  | 99.6                   |
| Rxn #52 | AnalytiCon Plate #17 | B7       | 50        | 0.578                             | 0.0598                                               | 0.561                                                  | -3.4                   |
| Rxn #52 | AnalytiCon Plate #17 | C7       | 50        | 0.500                             | 0.0598                                               | 0.561                                                  | 12.2                   |
| Rxn #52 | AnalytiCon Plate #17 | D7       | 50        | 0.548                             | 0.0598                                               | 0.561                                                  | 2.6                    |
| Rxn #52 | AnalytiCon Plate #17 | E7       | 50        | 0.541                             | 0.0598                                               | 0.561                                                  | 4.0                    |
| Rxn #52 | AnalytiCon Plate #17 | F7       | 50        | 0.522                             | 0.0598                                               | 0.561                                                  | 7.8                    |
| Rxn #52 | AnalytiCon Plate #17 | G7       | 50        | 0.576                             | 0.0598                                               | 0.561                                                  | -3.0                   |
| Rxn #52 | AnalytiCon Plate #17 | H7: FOC  | -         | 0.554                             | 0.0598                                               | 0.561                                                  | 1.4                    |
| Rxn #52 | AnalytiCon Plate #17 | A8: NFC  | -         | 0.056                             | 0.0598                                               | 0.561                                                  | 100.8                  |
| Rxn #52 | AnalytiCon Plate #17 | B8       | 50        | 0.569                             | 0.0598                                               | 0.561                                                  | -1.6                   |
| Rxn #52 | AnalytiCon Plate #17 | C8       | 50        | 0.511                             | 0.0598                                               | 0.561                                                  | 10.0                   |
| Rxn #52 | AnalytiCon Plate #17 | D8       | 50        | 0.599                             | 0.0598                                               | 0.561                                                  | -7.6                   |
| Rxn #52 | AnalytiCon Plate #17 | E8       | 50        | 0.566                             | 0.0598                                               | 0.561                                                  | -1.0                   |
| Rxn #52 | AnalytiCon Plate #17 | F8       | 50        | 0.565                             | 0.0598                                               | 0.561                                                  | -0.8                   |
| Rxn #52 | AnalytiCon Plate #17 | G8       | 50        | 0.417                             | 0.0598                                               | 0.561                                                  | 28.7                   |
| Rxn #52 | AnalytiCon Plate #17 | H8: FOC  | -         | 0.586                             | 0.0598                                               | 0.561                                                  | -5.0                   |
| Rxn #52 | AnalytiCon Plate #17 | A9: NFC  | -         | 0.060                             | 0.0598                                               | 0.561                                                  | 100.0                  |
| Rxn #52 | AnalytiCon Plate #17 | B9       | 50        | 0.582                             | 0.0598                                               | 0.561                                                  | -4.2                   |
| Rxn #52 | AnalytiCon Plate #17 | C9       | 50        | 0.481                             | 0.0598                                               | 0.561                                                  | 16.0                   |
| Rxn #52 | AnalytiCon Plate #17 | D9       | 50        | 0.571                             | 0.0598                                               | 0.561                                                  | -2.0                   |
| Rxn #52 | AnalytiCon Plate #17 | E9       | 50        | 0.566                             | 0.0598                                               | 0.561                                                  | -1.0                   |
| Rxn #52 | AnalytiCon Plate #17 | F9       | 50        | 0.524                             | 0.0598                                               | 0.561                                                  | 7.4                    |
| Rxn #52 | AnalytiCon Plate #17 | G9       | 50        | 0.563                             | 0.0598                                               | 0.561                                                  | -0.4                   |
| Rxn #52 | AnalytiCon Plate #17 | H9: FOC  | -         | 0.566                             | 0.0598                                               | 0.561                                                  | -1.0                   |
| Rxn #52 | AnalytiCon Plate #17 | A10: NFC | -         | 0.052                             | 0.0598                                               | 0.561                                                  | 101.6                  |
| Rxn #52 | AnalytiCon Plate #17 | B10      | 50        | 0.480                             | 0.0598                                               | 0.561                                                  | 16.2                   |
| Rxn #52 | AnalytiCon Plate #17 | C10      | 50        | 0.464                             | 0.0598                                               | 0.561                                                  | 19.4                   |
| Rxn #52 | AnalytiCon Plate #17 | D10      | 50        | 0.556                             | 0.0598                                               | 0.561                                                  | 1.0                    |
| Rxn #52 | AnalytiCon Plate #17 | E10      | 50        | 0.528                             | 0.0598                                               | 0.561                                                  | 6.6                    |
| Rxn #52 | AnalytiCon Plate #17 | F10      | 50        | 0.547                             | 0.0598                                               | 0.561                                                  | 2.8                    |
| Rxn #52 | AnalytiCon Plate #17 | G10      | 50        | 0.557                             | 0.0598                                               | 0.561                                                  | 0.8                    |
| Rxn #52 | AnalytiCon Plate #17 | H10: FOC | -         | 0.542                             | 0.0598                                               | 0.561                                                  | 3.8                    |
| Rxn #52 | AnalytiCon Plate #17 | A11: NFC | -         | 0.055                             | 0.0598                                               | 0.561                                                  | 101.0                  |
| Rxn #52 | AnalytiCon Plate #17 | B11      | 50        | 0.517                             | 0.0598                                               | 0.561                                                  | 8.8                    |
| Rxn #52 | AnalytiCon Plate #17 | C11      | 50        | 0.486                             | 0.0598                                               | 0.561                                                  | 15.0                   |
| Rxn #52 | AnalytiCon Plate #17 | D11      | 50        | 0.534                             | 0.0598                                               | 0.561                                                  | 5.4                    |
| Rxn #52 | AnalytiCon Plate #17 | E11      | 50        | 0.524                             | 0.0598                                               | 0.561                                                  | 7.4                    |
| Rxn #52 | AnalytiCon Plate #17 | F11      | 50        | 0.561                             | 0.0598                                               | 0.561                                                  | 0.0                    |
| Rxn #52 | AnalytiCon Plate #17 | G11      | 50        | 0.549                             | 0.0598                                               | 0.561                                                  | 2.4                    |
| Rxn #52 | AnalytiCon Plate #17 | H11: FOC | -         | 0.575                             | 0.0598                                               | 0.561                                                  | -2.8                   |
| Rxn #52 | AnalytiCon Plate #17 | A12: NFC | -         | 0.056                             | 0.0598                                               | 0.561                                                  | 100.8                  |
| Rxn #52 | AnalytiCon Plate #17 | H12: FOC | -         | 0.554                             | 0.0598                                               | 0.561                                                  | 1.4                    |
| Rxn #53 | AnalytiCon Plate #18 | A1: NFC  | -         | 0.099                             | 0.0772                                               | 0.533                                                  | 95.2                   |
| Rxn #53 | AnalytiCon Plate #18 | B1       | 50        | 0.487                             | 0.0772                                               | 0.533                                                  | 10.1                   |
| Rxn #53 | AnalytiCon Plate #18 | C1       | 50        | 0.534                             | 0.0772                                               | 0.533                                                  | -0.2                   |
| Rxn #53 | AnalytiCon Plate #18 | D1       | 50        | 0.572                             | 0.0772                                               | 0.533                                                  | -8.6                   |
| Rxn #53 | AnalytiCon Plate #18 | E1       | 50        | 0.562                             | 0.0772                                               | 0.533                                                  | -6.4                   |
| Rxn #53 | AnalytiCon Plate #18 | F1       | 50        | 0.574                             | 0.0772                                               | 0.533                                                  | -9.0                   |
| Rxn #53 | AnalytiCon Plate #18 | G1       | 50        | 0.605                             | 0.0772                                               | 0.533                                                  | -15.8                  |
| Rxn #53 | AnalytiCon Plate #18 | H1: FOC  | -         | 0.554                             | 0.0772                                               | 0.533                                                  | -4.6                   |
| Rxn #53 | AnalytiCon Plate #18 | A2: NFC  | -         | 0.065                             | 0.0772                                               | 0.533                                                  | 102.7                  |
| Rxn #53 | AnalytiCon Plate #18 | B2       | 50        | 0.624                             | 0.0772                                               | 0.533                                                  | -20.0                  |
| Rxn #53 | AnalytiCon Plate #18 | C2       | 50        | 0.587                             | 0.0772                                               | 0.533                                                  | -11.8                  |
| Rxn #53 | AnalytiCon Plate #18 | D2       | 50        | 0.574                             | 0.0772                                               | 0.533                                                  | -9.0                   |
| Rxn #53 | AnalytiCon Plate #18 | E2       | 50        | 0.561                             | 0.0772                                               | 0.533                                                  | -6.1                   |
| Rxn #53 | AnalytiCon Plate #18 | F2       | 50        | 0.582                             | 0.0772                                               | 0.533                                                  | -10.8                  |
| Rxn #53 | AnalytiCon Plate #18 | G2       | 50        | 0.530                             | 0.0772                                               | 0.533                                                  | 0.7                    |
| Rxn #53 | AnalytiCon Plate #18 | H2: FOC  | -         | 0.557                             | 0.0772                                               | 0.533                                                  | -5.3                   |
| Rxn #53 | AnalytiCon Plate #18 | A3: NFC  | -         | 0.073                             | 0.0772                                               | 0.533                                                  | 100.9                  |
| Rxn #53 | AnalytiCon Plate #18 | B3       | 50        | 0.534                             | 0.0772                                               | 0.533                                                  | -0.2                   |
| Rxn #53 | AnalytiCon Plate #18 | C3       | 50        | 0.576                             | 0.0772                                               | 0.533                                                  | -9.4                   |
| Rxn #53 | AnalytiCon Plate #18 | D3       | 50        | 0.511                             | 0.0772                                               | 0.533                                                  | 4.8                    |
| Rxn #53 | AnalytiCon Plate #18 | E3       | 50        | 0.507                             | 0.0772                                               | 0.533                                                  | 5.7                    |
| Rxn #53 | AnalytiCon Plate #18 | F3       | 50        | 0.595                             | 0.0772                                               | 0.533                                                  | -13.6                  |
| Rxn #53 | AnalytiCon Plate #18 | G3       | 50        | 0.556                             | 0.0772                                               | 0.533                                                  | -5.0                   |
| Rxn #53 | AnalytiCon Plate #18 | H3: FOC  | -         | 0.564                             | 0.0772                                               | 0.533                                                  | -6.8                   |

**S3 Table. Data from Screening of Phytochemical Library for Inhibition of KHKC Activity.**

| Rxn ID  | Sample               |          |           | Sample<br>( OD <sub>340nm</sub> ) | Ave. No Fructose Controls<br>( OD <sub>340nm</sub> ) | Ave. Fructose Only Controls<br>( OD <sub>340nm</sub> ) | KHKC<br>Inhibition (%) |
|---------|----------------------|----------|-----------|-----------------------------------|------------------------------------------------------|--------------------------------------------------------|------------------------|
|         | Phytochemical Plate  | Well     | Conc (µM) |                                   |                                                      |                                                        |                        |
| Rxn #53 | AnalytiCon Plate #18 | A4: NFC  | -         | 0.101                             | 0.0772                                               | 0.533                                                  | 94.8                   |
| Rxn #53 | AnalytiCon Plate #18 | B4       | 50        | 0.566                             | 0.0772                                               | 0.533                                                  | -7.2                   |
| Rxn #53 | AnalytiCon Plate #18 | C4       | 50        | 0.563                             | 0.0772                                               | 0.533                                                  | -6.6                   |
| Rxn #53 | AnalytiCon Plate #18 | D4       | 50        | 0.573                             | 0.0772                                               | 0.533                                                  | -8.8                   |
| Rxn #53 | AnalytiCon Plate #18 | E4       | 50        | 0.471                             | 0.0772                                               | 0.533                                                  | 13.6                   |
| Rxn #53 | AnalytiCon Plate #18 | F4       | 50        | 0.583                             | 0.0772                                               | 0.533                                                  | -11.0                  |
| Rxn #53 | AnalytiCon Plate #18 | G4       | 50        | 0.517                             | 0.0772                                               | 0.533                                                  | 3.5                    |
| Rxn #53 | AnalytiCon Plate #18 | H4: FOC  | -         | 0.220                             | 0.0772                                               | 0.533                                                  | 68.7                   |
| Rxn #53 | AnalytiCon Plate #18 | A5: NFC  | -         | 0.083                             | 0.0772                                               | 0.533                                                  | 98.7                   |
| Rxn #53 | AnalytiCon Plate #18 | B5: NFC  | -         | 0.072                             | 0.0772                                               | 0.533                                                  | 101.1                  |
| Rxn #53 | AnalytiCon Plate #18 | C5: NFC  | -         | 0.069                             | 0.0772                                               | 0.533                                                  | 101.8                  |
| Rxn #53 | AnalytiCon Plate #18 | D5: NFC  | -         | 0.067                             | 0.0772                                               | 0.533                                                  | 102.2                  |
| Rxn #53 | AnalytiCon Plate #18 | E5: FOC  | -         | 0.583                             | 0.0772                                               | 0.533                                                  | -11.0                  |
| Rxn #53 | AnalytiCon Plate #18 | F5: FOC  | -         | 0.566                             | 0.0772                                               | 0.533                                                  | -7.2                   |
| Rxn #53 | AnalytiCon Plate #18 | G5: FOC  | -         | 0.582                             | 0.0772                                               | 0.533                                                  | -10.8                  |
| Rxn #53 | AnalytiCon Plate #18 | H5: FOC  | -         | 0.558                             | 0.0772                                               | 0.533                                                  | -5.5                   |
| Rxn #53 | AnalytiCon Plate #18 | A6: NFC  | -         | 0.077                             | 0.0772                                               | 0.533                                                  | 100.0                  |
| Rxn #53 | AnalytiCon Plate #18 | B6       | 50        | 0.546                             | 0.0772                                               | 0.533                                                  | -2.9                   |
| Rxn #53 | AnalytiCon Plate #18 | C6       | 50        | 0.561                             | 0.0772                                               | 0.533                                                  | -6.1                   |
| Rxn #53 | AnalytiCon Plate #18 | D6       | 50        | 0.589                             | 0.0772                                               | 0.533                                                  | -12.3                  |
| Rxn #53 | AnalytiCon Plate #18 | E6       | 50        | 0.588                             | 0.0772                                               | 0.533                                                  | -12.1                  |
| Rxn #53 | AnalytiCon Plate #18 | F6       | 50        | 0.571                             | 0.0772                                               | 0.533                                                  | -8.3                   |
| Rxn #53 | AnalytiCon Plate #18 | G6       | 50        | 0.519                             | 0.0772                                               | 0.533                                                  | 3.1                    |
| Rxn #53 | AnalytiCon Plate #18 | H6: FOC  | -         | 0.575                             | 0.0772                                               | 0.533                                                  | -9.2                   |
| Rxn #53 | AnalytiCon Plate #18 | A7: NFC  | -         | 0.064                             | 0.0772                                               | 0.533                                                  | 102.9                  |
| Rxn #53 | AnalytiCon Plate #18 | B7       | 50        | 0.596                             | 0.0772                                               | 0.533                                                  | -13.8                  |
| Rxn #53 | AnalytiCon Plate #18 | C7       | 50        | 0.533                             | 0.0772                                               | 0.533                                                  | 0.0                    |
| Rxn #53 | AnalytiCon Plate #18 | D7       | 50        | 0.593                             | 0.0772                                               | 0.533                                                  | -13.2                  |
| Rxn #53 | AnalytiCon Plate #18 | E7       | 50        | 0.639                             | 0.0772                                               | 0.533                                                  | -23.3                  |
| Rxn #53 | AnalytiCon Plate #18 | F7       | 50        | 0.605                             | 0.0772                                               | 0.533                                                  | -15.8                  |
| Rxn #53 | AnalytiCon Plate #18 | G7       | 50        | 0.580                             | 0.0772                                               | 0.533                                                  | -10.3                  |
| Rxn #53 | AnalytiCon Plate #18 | H7: FOC  | -         | 0.570                             | 0.0772                                               | 0.533                                                  | -8.1                   |
| Rxn #53 | AnalytiCon Plate #18 | A8: NFC  | -         | 0.063                             | 0.0772                                               | 0.533                                                  | 103.1                  |
| Rxn #53 | AnalytiCon Plate #18 | B8       | 50        | 0.592                             | 0.0772                                               | 0.533                                                  | -12.9                  |
| Rxn #53 | AnalytiCon Plate #18 | C8       | 50        | 0.551                             | 0.0772                                               | 0.533                                                  | -3.9                   |
| Rxn #53 | AnalytiCon Plate #18 | D8       | 50        | 0.576                             | 0.0772                                               | 0.533                                                  | -9.4                   |
| Rxn #53 | AnalytiCon Plate #18 | E8       | 50        | 0.581                             | 0.0772                                               | 0.533                                                  | -10.5                  |
| Rxn #53 | AnalytiCon Plate #18 | F8       | 50        | 0.585                             | 0.0772                                               | 0.533                                                  | -11.4                  |
| Rxn #53 | AnalytiCon Plate #18 | G8       | 50        | 0.587                             | 0.0772                                               | 0.533                                                  | -11.8                  |
| Rxn #53 | AnalytiCon Plate #18 | H8: FOC  | -         | 0.572                             | 0.0772                                               | 0.533                                                  | -8.6                   |
| Rxn #53 | AnalytiCon Plate #18 | A9: NFC  | -         | 0.075                             | 0.0772                                               | 0.533                                                  | 100.5                  |
| Rxn #53 | AnalytiCon Plate #18 | B9       | 50        | 0.575                             | 0.0772                                               | 0.533                                                  | -9.2                   |
| Rxn #53 | AnalytiCon Plate #18 | C9       | 50        | 0.537                             | 0.0772                                               | 0.533                                                  | -0.9                   |
| Rxn #53 | AnalytiCon Plate #18 | D9       | 50        | 0.556                             | 0.0772                                               | 0.533                                                  | -5.0                   |
| Rxn #53 | AnalytiCon Plate #18 | E9       | 50        | 0.576                             | 0.0772                                               | 0.533                                                  | -9.4                   |
| Rxn #53 | AnalytiCon Plate #18 | F9       | 50        | 0.575                             | 0.0772                                               | 0.533                                                  | -9.2                   |
| Rxn #53 | AnalytiCon Plate #18 | G9       | 50        | 0.580                             | 0.0772                                               | 0.533                                                  | -10.3                  |
| Rxn #53 | AnalytiCon Plate #18 | H9: FOC  | -         | 0.588                             | 0.0772                                               | 0.533                                                  | -12.1                  |
| Rxn #53 | AnalytiCon Plate #18 | A10: NFC | -         | 0.081                             | 0.0772                                               | 0.533                                                  | 99.2                   |
| Rxn #53 | AnalytiCon Plate #18 | B10      | 50        | 0.605                             | 0.0772                                               | 0.533                                                  | -15.8                  |
| Rxn #53 | AnalytiCon Plate #18 | C10      | 50        | 0.504                             | 0.0772                                               | 0.533                                                  | 6.4                    |
| Rxn #53 | AnalytiCon Plate #18 | D10      | 50        | 0.547                             | 0.0772                                               | 0.533                                                  | -3.1                   |
| Rxn #53 | AnalytiCon Plate #18 | E10      | 50        | 0.547                             | 0.0772                                               | 0.533                                                  | -3.1                   |
| Rxn #53 | AnalytiCon Plate #18 | F10      | 50        | 0.563                             | 0.0772                                               | 0.533                                                  | -6.6                   |
| Rxn #53 | AnalytiCon Plate #18 | G10      | 50        | 0.551                             | 0.0772                                               | 0.533                                                  | -3.9                   |
| Rxn #53 | AnalytiCon Plate #18 | H10: FOC | -         | 0.555                             | 0.0772                                               | 0.533                                                  | -4.8                   |
| Rxn #53 | AnalytiCon Plate #18 | A11: NFC | -         | 0.068                             | 0.0772                                               | 0.533                                                  | 102.0                  |
| Rxn #53 | AnalytiCon Plate #18 | B11      | 50        | 0.570                             | 0.0772                                               | 0.533                                                  | -8.1                   |
| Rxn #53 | AnalytiCon Plate #18 | C11      | 50        | 0.464                             | 0.0772                                               | 0.533                                                  | 15.1                   |
| Rxn #53 | AnalytiCon Plate #18 | D11      | 50        | 0.549                             | 0.0772                                               | 0.533                                                  | -3.5                   |
| Rxn #53 | AnalytiCon Plate #18 | E11      | 50        | 0.575                             | 0.0772                                               | 0.533                                                  | -9.2                   |
| Rxn #53 | AnalytiCon Plate #18 | F11      | 50        | 0.543                             | 0.0772                                               | 0.533                                                  | -2.2                   |
| Rxn #53 | AnalytiCon Plate #18 | G11      | 50        | 0.565                             | 0.0772                                               | 0.533                                                  | -7.0                   |
| Rxn #53 | AnalytiCon Plate #18 | H11: FOC | -         | 0.547                             | 0.0772                                               | 0.533                                                  | -3.1                   |
| Rxn #53 | AnalytiCon Plate #18 | A12: NFC | -         | 0.101                             | 0.0772                                               | 0.533                                                  | 94.8                   |
| Rxn #53 | AnalytiCon Plate #18 | H12: FOC | -         | 0.550                             | 0.0772                                               | 0.533                                                  | -3.7                   |
| Rxn #54 | AnalytiCon Plate #19 | A1: NFC  | -         | 0.047                             | 0.0518                                               | 0.587                                                  | 100.9                  |
| Rxn #54 | AnalytiCon Plate #19 | B1       | 50        | 0.475                             | 0.0518                                               | 0.587                                                  | 20.9                   |
| Rxn #54 | AnalytiCon Plate #19 | C1       | 50        | 0.558                             | 0.0518                                               | 0.587                                                  | 5.4                    |
| Rxn #54 | AnalytiCon Plate #19 | D1       | 50        | 0.551                             | 0.0518                                               | 0.587                                                  | 6.7                    |
| Rxn #54 | AnalytiCon Plate #19 | E1       | 50        | 0.439                             | 0.0518                                               | 0.587                                                  | 27.7                   |
| Rxn #54 | AnalytiCon Plate #19 | F1       | 50        | 0.549                             | 0.0518                                               | 0.587                                                  | 7.1                    |
| Rxn #54 | AnalytiCon Plate #19 | G1       | 50        | 0.541                             | 0.0518                                               | 0.587                                                  | 8.6                    |
| Rxn #54 | AnalytiCon Plate #19 | H1: FOC  | -         | 0.538                             | 0.0518                                               | 0.587                                                  | 9.2                    |

**S3 Table. Data from Screening of Phytochemical Library for Inhibition of KHKC Activity.**

| Rxn ID  | Sample               |          |           | Sample<br>( OD <sub>340nm</sub> ) | Ave. No Fructose Controls<br>( OD <sub>340nm</sub> ) | Ave. Fructose Only Controls<br>( OD <sub>340nm</sub> ) | KHKC<br>Inhibition (%) |
|---------|----------------------|----------|-----------|-----------------------------------|------------------------------------------------------|--------------------------------------------------------|------------------------|
|         | Phytochemical Plate  | Well     | Conc (µM) |                                   |                                                      |                                                        |                        |
| Rxn #54 | AnalytiCon Plate #19 | A2: NFC  | -         | 0.048                             | 0.0518                                               | 0.587                                                  | 100.7                  |
| Rxn #54 | AnalytiCon Plate #19 | B2       | 50        | 0.584                             | 0.0518                                               | 0.587                                                  | 0.6                    |
| Rxn #54 | AnalytiCon Plate #19 | C2       | 50        | 0.529                             | 0.0518                                               | 0.587                                                  | 10.8                   |
| Rxn #54 | AnalytiCon Plate #19 | D2       | 50        | 0.549                             | 0.0518                                               | 0.587                                                  | 7.1                    |
| Rxn #54 | AnalytiCon Plate #19 | E2       | 50        | 0.562                             | 0.0518                                               | 0.587                                                  | 4.7                    |
| Rxn #54 | AnalytiCon Plate #19 | F2       | 50        | 0.469                             | 0.0518                                               | 0.587                                                  | 22.0                   |
| Rxn #54 | AnalytiCon Plate #19 | G2       | 50        | 0.462                             | 0.0518                                               | 0.587                                                  | 23.4                   |
| Rxn #54 | AnalytiCon Plate #19 | H2: FOC  | -         | 0.592                             | 0.0518                                               | 0.587                                                  | -0.9                   |
| Rxn #54 | AnalytiCon Plate #19 | A3: NFC  | -         | 0.055                             | 0.0518                                               | 0.587                                                  | 99.4                   |
| Rxn #54 | AnalytiCon Plate #19 | B3       | 50        | 0.590                             | 0.0518                                               | 0.587                                                  | -0.6                   |
| Rxn #54 | AnalytiCon Plate #19 | C3       | 50        | 0.597                             | 0.0518                                               | 0.587                                                  | -1.9                   |
| Rxn #54 | AnalytiCon Plate #19 | D3       | 50        | 0.622                             | 0.0518                                               | 0.587                                                  | -6.5                   |
| Rxn #54 | AnalytiCon Plate #19 | E3       | 50        | 0.750                             | 0.0518                                               | 0.587                                                  | -30.5                  |
| Rxn #54 | AnalytiCon Plate #19 | F3       | 50        | 0.580                             | 0.0518                                               | 0.587                                                  | 1.3                    |
| Rxn #54 | AnalytiCon Plate #19 | G3       | 50        | 0.574                             | 0.0518                                               | 0.587                                                  | 2.4                    |
| Rxn #54 | AnalytiCon Plate #19 | H3: FOC  | -         | 0.573                             | 0.0518                                               | 0.587                                                  | 2.6                    |
| Rxn #54 | AnalytiCon Plate #19 | A4: NFC  | -         | 0.054                             | 0.0518                                               | 0.587                                                  | 99.6                   |
| Rxn #54 | AnalytiCon Plate #19 | B4       | 50        | 0.567                             | 0.0518                                               | 0.587                                                  | 3.7                    |
| Rxn #54 | AnalytiCon Plate #19 | C4       | 50        | 0.592                             | 0.0518                                               | 0.587                                                  | -0.9                   |
| Rxn #54 | AnalytiCon Plate #19 | D4       | 50        | 0.597                             | 0.0518                                               | 0.587                                                  | -1.9                   |
| Rxn #54 | AnalytiCon Plate #19 | E4       | 50        | 0.632                             | 0.0518                                               | 0.587                                                  | -8.4                   |
| Rxn #54 | AnalytiCon Plate #19 | F4       | 50        | 0.545                             | 0.0518                                               | 0.587                                                  | 7.8                    |
| Rxn #54 | AnalytiCon Plate #19 | G4       | 50        | 0.604                             | 0.0518                                               | 0.587                                                  | -3.2                   |
| Rxn #54 | AnalytiCon Plate #19 | H4: FOC  | -         | 0.606                             | 0.0518                                               | 0.587                                                  | -3.6                   |
| Rxn #54 | AnalytiCon Plate #19 | A5: NFC  | -         | 0.047                             | 0.0518                                               | 0.587                                                  | 100.9                  |
| Rxn #54 | AnalytiCon Plate #19 | B5: NFC  | -         | 0.049                             | 0.0518                                               | 0.587                                                  | 100.5                  |
| Rxn #54 | AnalytiCon Plate #19 | C5: NFC  | -         | 0.046                             | 0.0518                                               | 0.587                                                  | 101.1                  |
| Rxn #54 | AnalytiCon Plate #19 | D5: NFC  | -         | 0.048                             | 0.0518                                               | 0.587                                                  | 100.7                  |
| Rxn #54 | AnalytiCon Plate #19 | E5: FOC  | -         | 0.618                             | 0.0518                                               | 0.587                                                  | -5.8                   |
| Rxn #54 | AnalytiCon Plate #19 | F5: FOC  | -         | 0.577                             | 0.0518                                               | 0.587                                                  | 1.9                    |
| Rxn #54 | AnalytiCon Plate #19 | G5: FOC  | -         | 0.573                             | 0.0518                                               | 0.587                                                  | 2.6                    |
| Rxn #54 | AnalytiCon Plate #19 | H5: FOC  | -         | 0.579                             | 0.0518                                               | 0.587                                                  | 1.5                    |
| Rxn #54 | AnalytiCon Plate #19 | A6: NFC  | -         | 0.089                             | 0.0518                                               | 0.587                                                  | 93.0                   |
| Rxn #54 | AnalytiCon Plate #19 | B6       | 50        | 0.593                             | 0.0518                                               | 0.587                                                  | -1.1                   |
| Rxn #54 | AnalytiCon Plate #19 | C6       | 50        | 0.619                             | 0.0518                                               | 0.587                                                  | -6.0                   |
| Rxn #54 | AnalytiCon Plate #19 | D6       | 50        | 0.591                             | 0.0518                                               | 0.587                                                  | -0.7                   |
| Rxn #54 | AnalytiCon Plate #19 | E6       | 50        | 0.596                             | 0.0518                                               | 0.587                                                  | -1.7                   |
| Rxn #54 | AnalytiCon Plate #19 | F6       | 50        | 0.612                             | 0.0518                                               | 0.587                                                  | -4.7                   |
| Rxn #54 | AnalytiCon Plate #19 | G6       | 50        | 0.607                             | 0.0518                                               | 0.587                                                  | -3.7                   |
| Rxn #54 | AnalytiCon Plate #19 | H6: FOC  | -         | 0.612                             | 0.0518                                               | 0.587                                                  | -4.7                   |
| Rxn #54 | AnalytiCon Plate #19 | A7: NFC  | -         | 0.048                             | 0.0518                                               | 0.587                                                  | 100.7                  |
| Rxn #54 | AnalytiCon Plate #19 | B7       | 50        | 0.575                             | 0.0518                                               | 0.587                                                  | 2.2                    |
| Rxn #54 | AnalytiCon Plate #19 | C7       | 50        | 0.580                             | 0.0518                                               | 0.587                                                  | 1.3                    |
| Rxn #54 | AnalytiCon Plate #19 | D7       | 50        | 0.616                             | 0.0518                                               | 0.587                                                  | -5.4                   |
| Rxn #54 | AnalytiCon Plate #19 | E7       | 50        | 0.536                             | 0.0518                                               | 0.587                                                  | 9.5                    |
| Rxn #54 | AnalytiCon Plate #19 | F7       | 50        | 0.614                             | 0.0518                                               | 0.587                                                  | -5.0                   |
| Rxn #54 | AnalytiCon Plate #19 | G7       | 50        | 0.575                             | 0.0518                                               | 0.587                                                  | 2.2                    |
| Rxn #54 | AnalytiCon Plate #19 | H7: FOC  | -         | 0.600                             | 0.0518                                               | 0.587                                                  | -2.4                   |
| Rxn #54 | AnalytiCon Plate #19 | A8: NFC  | -         | 0.050                             | 0.0518                                               | 0.587                                                  | 100.3                  |
| Rxn #54 | AnalytiCon Plate #19 | B8       | 50        | 0.572                             | 0.0518                                               | 0.587                                                  | 2.8                    |
| Rxn #54 | AnalytiCon Plate #19 | C8       | 50        | 0.607                             | 0.0518                                               | 0.587                                                  | -3.7                   |
| Rxn #54 | AnalytiCon Plate #19 | D8       | 50        | 0.625                             | 0.0518                                               | 0.587                                                  | -7.1                   |
| Rxn #54 | AnalytiCon Plate #19 | E8       | 50        | 0.616                             | 0.0518                                               | 0.587                                                  | -5.4                   |
| Rxn #54 | AnalytiCon Plate #19 | F8       | 50        | 0.550                             | 0.0518                                               | 0.587                                                  | 6.9                    |
| Rxn #54 | AnalytiCon Plate #19 | G8       | 50        | 0.581                             | 0.0518                                               | 0.587                                                  | 1.1                    |
| Rxn #54 | AnalytiCon Plate #19 | H8: FOC  | -         | 0.610                             | 0.0518                                               | 0.587                                                  | -4.3                   |
| Rxn #54 | AnalytiCon Plate #19 | A9: NFC  | -         | 0.050                             | 0.0518                                               | 0.587                                                  | 100.3                  |
| Rxn #54 | AnalytiCon Plate #19 | B9       | 50        | 0.560                             | 0.0518                                               | 0.587                                                  | 5.0                    |
| Rxn #54 | AnalytiCon Plate #19 | C9       | 50        | 0.611                             | 0.0518                                               | 0.587                                                  | -4.5                   |
| Rxn #54 | AnalytiCon Plate #19 | D9       | 50        | 0.618                             | 0.0518                                               | 0.587                                                  | -5.8                   |
| Rxn #54 | AnalytiCon Plate #19 | E9       | 50        | 0.572                             | 0.0518                                               | 0.587                                                  | 2.8                    |
| Rxn #54 | AnalytiCon Plate #19 | F9       | 50        | 0.578                             | 0.0518                                               | 0.587                                                  | 1.7                    |
| Rxn #54 | AnalytiCon Plate #19 | G9       | 50        | 0.537                             | 0.0518                                               | 0.587                                                  | 9.3                    |
| Rxn #54 | AnalytiCon Plate #19 | H9: FOC  | -         | 0.612                             | 0.0518                                               | 0.587                                                  | -4.7                   |
| Rxn #54 | AnalytiCon Plate #19 | A10: NFC | -         | 0.054                             | 0.0518                                               | 0.587                                                  | 99.6                   |
| Rxn #54 | AnalytiCon Plate #19 | B10      | 50        | 0.466                             | 0.0518                                               | 0.587                                                  | 22.6                   |
| Rxn #54 | AnalytiCon Plate #19 | C10      | 50        | 0.592                             | 0.0518                                               | 0.587                                                  | -0.9                   |
| Rxn #54 | AnalytiCon Plate #19 | D10      | 50        | 0.533                             | 0.0518                                               | 0.587                                                  | 10.1                   |
| Rxn #54 | AnalytiCon Plate #19 | E10      | 50        | 0.582                             | 0.0518                                               | 0.587                                                  | 0.9                    |
| Rxn #54 | AnalytiCon Plate #19 | F10      | 50        | 0.602                             | 0.0518                                               | 0.587                                                  | -2.8                   |
| Rxn #54 | AnalytiCon Plate #19 | G10      | 50        | 0.613                             | 0.0518                                               | 0.587                                                  | -4.9                   |
| Rxn #54 | AnalytiCon Plate #19 | H10: FOC | -         | 0.623                             | 0.0518                                               | 0.587                                                  | -6.7                   |
| Rxn #54 | AnalytiCon Plate #19 | A11: NFC | -         | 0.043                             | 0.0518                                               | 0.587                                                  | 101.6                  |
| Rxn #54 | AnalytiCon Plate #19 | B11      | 50        | 0.497                             | 0.0518                                               | 0.587                                                  | 16.8                   |

**S3 Table. Data from Screening of Phytochemical Library for Inhibition of KHKC Activity.**

| Rxn ID  | Sample               |          |           | Sample<br>( OD <sub>340nm</sub> ) | Ave. No Fructose Controls<br>( OD <sub>340nm</sub> ) | Ave. Fructose Only Controls<br>( OD <sub>340nm</sub> ) | KHKC<br>Inhibition (%) |
|---------|----------------------|----------|-----------|-----------------------------------|------------------------------------------------------|--------------------------------------------------------|------------------------|
|         | Phytochemical Plate  | Well     | Conc (µM) |                                   |                                                      |                                                        |                        |
| Rxn #54 | AnalytiCon Plate #19 | C11      | 50        | 0.522                             | 0.0518                                               | 0.587                                                  | 12.1                   |
| Rxn #54 | AnalytiCon Plate #19 | D11      | 50        | 0.636                             | 0.0518                                               | 0.587                                                  | -9.2                   |
| Rxn #54 | AnalytiCon Plate #19 | E11      | 50        | 0.578                             | 0.0518                                               | 0.587                                                  | 1.7                    |
| Rxn #54 | AnalytiCon Plate #19 | F11      | 50        | 0.572                             | 0.0518                                               | 0.587                                                  | 2.8                    |
| Rxn #54 | AnalytiCon Plate #19 | G11      | 50        | 0.555                             | 0.0518                                               | 0.587                                                  | 6.0                    |
| Rxn #54 | AnalytiCon Plate #19 | H11: FOC | -         | 0.615                             | 0.0518                                               | 0.587                                                  | -5.2                   |
| Rxn #54 | AnalytiCon Plate #19 | A12: NFC | -         | 0.049                             | 0.0518                                               | 0.587                                                  | 100.5                  |
| Rxn #54 | AnalytiCon Plate #19 | H12: FOC | -         | 0.611                             | 0.0518                                               | 0.587                                                  | -4.5                   |
| Rxn #55 | AnalytiCon Plate #20 | A1: NFC  | -         | 0.068                             | 0.0641                                               | 0.579                                                  | 99.2                   |
| Rxn #55 | AnalytiCon Plate #20 | B1       | 50        | 0.516                             | 0.0641                                               | 0.579                                                  | 12.2                   |
| Rxn #55 | AnalytiCon Plate #20 | C1       | 50        | 0.581                             | 0.0641                                               | 0.579                                                  | -0.4                   |
| Rxn #55 | AnalytiCon Plate #20 | D1       | 50        | 0.556                             | 0.0641                                               | 0.579                                                  | 4.5                    |
| Rxn #55 | AnalytiCon Plate #20 | E1       | 50        | 0.529                             | 0.0641                                               | 0.579                                                  | 9.7                    |
| Rxn #55 | AnalytiCon Plate #20 | F1       | 50        | 0.541                             | 0.0641                                               | 0.579                                                  | 7.4                    |
| Rxn #55 | AnalytiCon Plate #20 | G1       | 50        | 0.559                             | 0.0641                                               | 0.579                                                  | 3.9                    |
| Rxn #55 | AnalytiCon Plate #20 | H1: FOC  | -         | 0.551                             | 0.0641                                               | 0.579                                                  | 5.4                    |
| Rxn #55 | AnalytiCon Plate #20 | A2: NFC  | -         | 0.068                             | 0.0641                                               | 0.579                                                  | 99.2                   |
| Rxn #55 | AnalytiCon Plate #20 | B2       | 50        | 0.447                             | 0.0641                                               | 0.579                                                  | 25.6                   |
| Rxn #55 | AnalytiCon Plate #20 | C2       | 50        | 0.426                             | 0.0641                                               | 0.579                                                  | 29.7                   |
| Rxn #55 | AnalytiCon Plate #20 | D2       | 50        | 0.571                             | 0.0641                                               | 0.579                                                  | 1.6                    |
| Rxn #55 | AnalytiCon Plate #20 | E2       | 50        | 0.544                             | 0.0641                                               | 0.579                                                  | 6.8                    |
| Rxn #55 | AnalytiCon Plate #20 | F2       | 50        | 0.456                             | 0.0641                                               | 0.579                                                  | 23.9                   |
| Rxn #55 | AnalytiCon Plate #20 | G2       | 50        | 0.526                             | 0.0641                                               | 0.579                                                  | 10.3                   |
| Rxn #55 | AnalytiCon Plate #20 | H2: FOC  | -         | 0.563                             | 0.0641                                               | 0.579                                                  | 3.1                    |
| Rxn #55 | AnalytiCon Plate #20 | A3: NFC  | -         | 0.053                             | 0.0641                                               | 0.579                                                  | 102.2                  |
| Rxn #55 | AnalytiCon Plate #20 | B3       | 50        | 0.471                             | 0.0641                                               | 0.579                                                  | 21.0                   |
| Rxn #55 | AnalytiCon Plate #20 | C3       | 50        | 0.575                             | 0.0641                                               | 0.579                                                  | 0.8                    |
| Rxn #55 | AnalytiCon Plate #20 | D3       | 50        | 0.486                             | 0.0641                                               | 0.579                                                  | 18.1                   |
| Rxn #55 | AnalytiCon Plate #20 | E3       | 50        | 0.559                             | 0.0641                                               | 0.579                                                  | 3.9                    |
| Rxn #55 | AnalytiCon Plate #20 | F3       | 50        | 0.485                             | 0.0641                                               | 0.579                                                  | 18.3                   |
| Rxn #55 | AnalytiCon Plate #20 | G3       | 50        | 0.437                             | 0.0641                                               | 0.579                                                  | 27.6                   |
| Rxn #55 | AnalytiCon Plate #20 | H3: FOC  | -         | 0.563                             | 0.0641                                               | 0.579                                                  | 3.1                    |
| Rxn #55 | AnalytiCon Plate #20 | A4: NFC  | -         | 0.068                             | 0.0641                                               | 0.579                                                  | 99.2                   |
| Rxn #55 | AnalytiCon Plate #20 | B4       | 50        | 0.538                             | 0.0641                                               | 0.579                                                  | 8.0                    |
| Rxn #55 | AnalytiCon Plate #20 | C4       | 50        | 0.512                             | 0.0641                                               | 0.579                                                  | 13.0                   |
| Rxn #55 | AnalytiCon Plate #20 | D4       | 50        | 0.569                             | 0.0641                                               | 0.579                                                  | 1.9                    |
| Rxn #55 | AnalytiCon Plate #20 | E4       | 50        | 0.554                             | 0.0641                                               | 0.579                                                  | 4.9                    |
| Rxn #55 | AnalytiCon Plate #20 | F4       | 50        | 0.565                             | 0.0641                                               | 0.579                                                  | 2.7                    |
| Rxn #55 | AnalytiCon Plate #20 | G4       | 50        | 0.505                             | 0.0641                                               | 0.579                                                  | 14.4                   |
| Rxn #55 | AnalytiCon Plate #20 | H4: FOC  | -         | 0.579                             | 0.0641                                               | 0.579                                                  | 0.0                    |
| Rxn #55 | AnalytiCon Plate #20 | A5: NFC  | -         | 0.066                             | 0.0641                                               | 0.579                                                  | 99.6                   |
| Rxn #55 | AnalytiCon Plate #20 | B5: NFC  | -         | 0.048                             | 0.0641                                               | 0.579                                                  | 103.1                  |
| Rxn #55 | AnalytiCon Plate #20 | C5: NFC  | -         | 0.054                             | 0.0641                                               | 0.579                                                  | 102.0                  |
| Rxn #55 | AnalytiCon Plate #20 | D5: NFC  | -         | 0.051                             | 0.0641                                               | 0.579                                                  | 102.5                  |
| Rxn #55 | AnalytiCon Plate #20 | E5: FOC  | -         | 0.580                             | 0.0641                                               | 0.579                                                  | -0.2                   |
| Rxn #55 | AnalytiCon Plate #20 | F5: FOC  | -         | 0.596                             | 0.0641                                               | 0.579                                                  | -3.3                   |
| Rxn #55 | AnalytiCon Plate #20 | G5: FOC  | -         | 0.588                             | 0.0641                                               | 0.579                                                  | -1.7                   |
| Rxn #55 | AnalytiCon Plate #20 | H5: FOC  | -         | 0.601                             | 0.0641                                               | 0.579                                                  | -4.3                   |
| Rxn #55 | AnalytiCon Plate #20 | A6: NFC  | -         | 0.068                             | 0.0641                                               | 0.579                                                  | 99.2                   |
| Rxn #55 | AnalytiCon Plate #20 | B6       | 50        | 0.550                             | 0.0641                                               | 0.579                                                  | 5.6                    |
| Rxn #55 | AnalytiCon Plate #20 | C6       | 50        | 0.571                             | 0.0641                                               | 0.579                                                  | 1.6                    |
| Rxn #55 | AnalytiCon Plate #20 | D6       | 50        | 0.552                             | 0.0641                                               | 0.579                                                  | 5.2                    |
| Rxn #55 | AnalytiCon Plate #20 | E6       | 50        | 0.552                             | 0.0641                                               | 0.579                                                  | 5.2                    |
| Rxn #55 | AnalytiCon Plate #20 | F6       | 50        | 0.587                             | 0.0641                                               | 0.579                                                  | -1.6                   |
| Rxn #55 | AnalytiCon Plate #20 | G6       | 50        | 0.554                             | 0.0641                                               | 0.579                                                  | 4.9                    |
| Rxn #55 | AnalytiCon Plate #20 | H6: FOC  | -         | 0.593                             | 0.0641                                               | 0.579                                                  | -2.7                   |
| Rxn #55 | AnalytiCon Plate #20 | A7: NFC  | -         | 0.078                             | 0.0641                                               | 0.579                                                  | 97.3                   |
| Rxn #55 | AnalytiCon Plate #20 | B7       | 50        | 0.471                             | 0.0641                                               | 0.579                                                  | 21.0                   |
| Rxn #55 | AnalytiCon Plate #20 | C7       | 50        | 0.539                             | 0.0641                                               | 0.579                                                  | 7.8                    |
| Rxn #55 | AnalytiCon Plate #20 | D7       | 50        | 0.552                             | 0.0641                                               | 0.579                                                  | 5.2                    |
| Rxn #55 | AnalytiCon Plate #20 | E7       | 50        | 0.612                             | 0.0641                                               | 0.579                                                  | -6.4                   |
| Rxn #55 | AnalytiCon Plate #20 | F7       | 50        | 0.521                             | 0.0641                                               | 0.579                                                  | 11.3                   |
| Rxn #55 | AnalytiCon Plate #20 | G7       | 50        | 0.512                             | 0.0641                                               | 0.579                                                  | 13.0                   |
| Rxn #55 | AnalytiCon Plate #20 | H7: FOC  | -         | 0.579                             | 0.0641                                               | 0.579                                                  | 0.0                    |
| Rxn #55 | AnalytiCon Plate #20 | A8: NFC  | -         | 0.057                             | 0.0641                                               | 0.579                                                  | 101.4                  |
| Rxn #55 | AnalytiCon Plate #20 | B8       | 50        | 0.537                             | 0.0641                                               | 0.579                                                  | 8.2                    |
| Rxn #55 | AnalytiCon Plate #20 | C8       | 50        | 0.506                             | 0.0641                                               | 0.579                                                  | 14.2                   |
| Rxn #55 | AnalytiCon Plate #20 | D8       | 50        | 0.492                             | 0.0641                                               | 0.579                                                  | 16.9                   |
| Rxn #55 | AnalytiCon Plate #20 | E8       | 50        | 0.457                             | 0.0641                                               | 0.579                                                  | 23.7                   |
| Rxn #55 | AnalytiCon Plate #20 | F8       | 50        | 0.588                             | 0.0641                                               | 0.579                                                  | -1.7                   |
| Rxn #55 | AnalytiCon Plate #20 | G8       | 50        | 0.552                             | 0.0641                                               | 0.579                                                  | 5.2                    |
| Rxn #55 | AnalytiCon Plate #20 | H8: FOC  | -         | 0.584                             | 0.0641                                               | 0.579                                                  | -1.0                   |
| Rxn #55 | AnalytiCon Plate #20 | A9: NFC  | -         | 0.059                             | 0.0641                                               | 0.579                                                  | 101.0                  |
| Rxn #55 | AnalytiCon Plate #20 | B9       | 50        | 0.495                             | 0.0641                                               | 0.579                                                  | 16.3                   |



**S3 Table. Data from Screening of Phytochemical Library for Inhibition of KHKC Activity.**

| Rxn ID  | Sample               |          |           | Sample<br>( OD <sub>340nm</sub> ) | Ave. No Fructose Controls<br>( OD <sub>340nm</sub> ) | Ave. Fructose Only Controls<br>( OD <sub>340nm</sub> ) | KHKC<br>Inhibition (%) |
|---------|----------------------|----------|-----------|-----------------------------------|------------------------------------------------------|--------------------------------------------------------|------------------------|
|         | Phytochemical Plate  | Well     | Conc (µM) |                                   |                                                      |                                                        |                        |
| Rxn #55 | AnalytiCon Plate #20 | C9       | 50        | 0.553                             | 0.0641                                               | 0.579                                                  | 5.0                    |
| Rxn #55 | AnalytiCon Plate #20 | D9       | 50        | 0.586                             | 0.0641                                               | 0.579                                                  | -1.4                   |
| Rxn #55 | AnalytiCon Plate #20 | E9       | 50        | 0.488                             | 0.0641                                               | 0.579                                                  | 17.7                   |
| Rxn #55 | AnalytiCon Plate #20 | F9       | 50        | 0.589                             | 0.0641                                               | 0.579                                                  | -1.9                   |
| Rxn #55 | AnalytiCon Plate #20 | G9       | 50        | 0.551                             | 0.0641                                               | 0.579                                                  | 5.4                    |
| Rxn #55 | AnalytiCon Plate #20 | H9: FOC  | -         | 0.565                             | 0.0641                                               | 0.579                                                  | 2.7                    |
| Rxn #55 | AnalytiCon Plate #20 | A10: NFC | -         | 0.078                             | 0.0641                                               | 0.579                                                  | 97.3                   |
| Rxn #55 | AnalytiCon Plate #20 | B10      | 50        | 0.561                             | 0.0641                                               | 0.579                                                  | 3.5                    |
| Rxn #55 | AnalytiCon Plate #20 | C10      | 50        | 0.505                             | 0.0641                                               | 0.579                                                  | 14.4                   |
| Rxn #55 | AnalytiCon Plate #20 | D10      | 50        | 0.487                             | 0.0641                                               | 0.579                                                  | 17.9                   |
| Rxn #55 | AnalytiCon Plate #20 | E10      | 50        | 0.565                             | 0.0641                                               | 0.579                                                  | 2.7                    |
| Rxn #55 | AnalytiCon Plate #20 | F10      | 50        | 0.559                             | 0.0641                                               | 0.579                                                  | 3.9                    |
| Rxn #55 | AnalytiCon Plate #20 | G10      | 50        | 0.553                             | 0.0641                                               | 0.579                                                  | 5.0                    |
| Rxn #55 | AnalytiCon Plate #20 | H10: FOC | -         | 0.595                             | 0.0641                                               | 0.579                                                  | -3.1                   |
| Rxn #55 | AnalytiCon Plate #20 | A11: NFC | -         | 0.086                             | 0.0641                                               | 0.579                                                  | 95.7                   |
| Rxn #55 | AnalytiCon Plate #20 | B11      | 50        | 0.516                             | 0.0641                                               | 0.579                                                  | 12.2                   |
| Rxn #55 | AnalytiCon Plate #20 | C11      | 50        | 0.485                             | 0.0641                                               | 0.579                                                  | 18.3                   |
| Rxn #55 | AnalytiCon Plate #20 | D11      | 50        | 0.565                             | 0.0641                                               | 0.579                                                  | 2.7                    |
| Rxn #55 | AnalytiCon Plate #20 | E11      | 50        | 0.549                             | 0.0641                                               | 0.579                                                  | 5.8                    |
| Rxn #55 | AnalytiCon Plate #20 | F11      | 50        | 0.517                             | 0.0641                                               | 0.579                                                  | 12.0                   |
| Rxn #55 | AnalytiCon Plate #20 | G11      | 50        | 0.552                             | 0.0641                                               | 0.579                                                  | 5.2                    |
| Rxn #55 | AnalytiCon Plate #20 | H11: FOC | -         | 0.553                             | 0.0641                                               | 0.579                                                  | 5.0                    |
| Rxn #55 | AnalytiCon Plate #20 | A12: NFC | -         | 0.059                             | 0.0641                                               | 0.579                                                  | 101.0                  |
| Rxn #55 | AnalytiCon Plate #20 | H12: FOC | -         | 0.537                             | 0.0641                                               | 0.579                                                  | 8.2                    |

AnalytiCon: Phytochemicals from MEGx library (AnalytiCon Discovery GmbH, Potsdam, Germany) were selected and purchased by Amway Corp.

KHKC: ketohexokinase isoform C. FOC: fructose only control. NFC: no fructose control. OD: optical density.
