# Supplementary material for: Bioactivity-Guided Identification of Botanical Inhibitors of Ketohexokinase
Source: PubMed Central journal article supplement (PMC4913896; doi:10.1371/journal.pone.0157458), 2016-06-20
Supplement: pone.0157458.s004.pdf [file pone.0157458.s004.pdf]

**S4 Table. Data from Titrations of Candidate Phytochemicals for Inhibition of KHKC Activity.**

| Rxn     |      | Sample                |      |           | Sample                  | Ave. No Fructose Controls |                         | Ave. Fructose Only Controls |                | KHKC | *KHKC IC <sub>50</sub> |
|---------|------|-----------------------|------|-----------|-------------------------|---------------------------|-------------------------|-----------------------------|----------------|------|------------------------|
| ID      | Well | Phytochemical Plate   | Well | Conc (µM) | ( OD <sub>340nm</sub> ) | ( OD <sub>340nm</sub> )   | ( OD <sub>340nm</sub> ) | ( OD <sub>340nm</sub> )     | Inhibition (%) | (µM) |                        |
| Rxn #44 | A1   | AnalytiCon Plate #1   | D10  | 106.58    | 0.284                   | 0.118                     | 0.682                   | 70.6                        | 3.48           |      |                        |
| Rxn #44 | B1   | AnalytiCon Plate #1   | D10  | 79.93     | 0.312                   | 0.118                     | 0.682                   | 65.6                        |                |      |                        |
| Rxn #44 | C1   | AnalytiCon Plate #1   | D10  | 53.29     | 0.252                   | 0.118                     | 0.682                   | 76.2                        |                |      |                        |
| Rxn #44 | D1   | AnalytiCon Plate #1   | D10  | 26.64     | 0.262                   | 0.118                     | 0.682                   | 74.5                        |                |      |                        |
| Rxn #44 | E1   | AnalytiCon Plate #1   | D10  | 13.32     | 0.294                   | 0.118                     | 0.682                   | 68.8                        |                |      |                        |
| Rxn #44 | F1   | AnalytiCon Plate #1   | D10  | 5.33      | 0.379                   | 0.118                     | 0.682                   | 53.7                        |                |      |                        |
| Rxn #44 | G1   | AnalytiCon Plate #1   | D10  | 2.66      | 0.514                   | 0.118                     | 0.682                   | 29.8                        |                |      |                        |
| Rxn #44 | H1   | AnalytiCon Plate #1   | D10  | 0.05      | 0.707                   | 0.118                     | 0.682                   | -4.4                        |                |      |                        |
| Rxn #44 | A2   | AnalytiCon Plate #1   | G7   | 110.48    | 0.249                   | 0.118                     | 0.682                   | 76.8                        | 10.33          |      |                        |
| Rxn #44 | B2   | AnalytiCon Plate #1   | G7   | 82.86     | 0.225                   | 0.118                     | 0.682                   | 81.0                        |                |      |                        |
| Rxn #44 | C2   | AnalytiCon Plate #1   | G7   | 55.24     | 0.230                   | 0.118                     | 0.682                   | 80.1                        |                |      |                        |
| Rxn #44 | D2   | AnalytiCon Plate #1   | G7   | 27.62     | 0.302                   | 0.118                     | 0.682                   | 67.4                        |                |      |                        |
| Rxn #44 | E2   | AnalytiCon Plate #1   | G7   | 13.81     | 0.354                   | 0.118                     | 0.682                   | 58.2                        |                |      |                        |
| Rxn #44 | F2   | AnalytiCon Plate #1   | G7   | 5.52      | 0.530                   | 0.118                     | 0.682                   | 27.0                        |                |      |                        |
| Rxn #44 | G2   | AnalytiCon Plate #1   | G7   | 2.76      | 0.586                   | 0.118                     | 0.682                   | 17.0                        |                |      |                        |
| Rxn #44 | H2   | AnalytiCon Plate #1   | G7   | 0.06      | 0.715                   | 0.118                     | 0.682                   | -5.9                        |                |      |                        |
| Rxn #44 | A3   | AnalytiCon Plate #2   | F8   | 71.7      | 0.288                   | 0.118                     | 0.682                   | 69.9                        | 29.45          |      |                        |
| Rxn #44 | B3   | AnalytiCon Plate #2   | F8   | 53.78     | 0.320                   | 0.118                     | 0.682                   | 64.2                        |                |      |                        |
| Rxn #44 | C3   | AnalytiCon Plate #2   | F8   | 35.85     | 0.383                   | 0.118                     | 0.682                   | 53.0                        |                |      |                        |
| Rxn #44 | D3   | AnalytiCon Plate #2   | F8   | 17.93     | 0.474                   | 0.118                     | 0.682                   | 36.9                        |                |      |                        |
| Rxn #44 | E3   | AnalytiCon Plate #2   | F8   | 8.96      | 0.540                   | 0.118                     | 0.682                   | 25.2                        |                |      |                        |
| Rxn #44 | F3   | AnalytiCon Plate #2   | F8   | 3.59      | 0.631                   | 0.118                     | 0.682                   | 9.0                         |                |      |                        |
| Rxn #44 | G3   | AnalytiCon Plate #2   | F8   | 1.79      | 0.626                   | 0.118                     | 0.682                   | 9.9                         |                |      |                        |
| Rxn #44 | H3   | AnalytiCon Plate #2   | F8   | 0.04      | 0.712                   | 0.118                     | 0.682                   | -5.3                        |                |      |                        |
| Rxn #44 | A4   | AnalytiCon Plate #2   | B8   | 83.7      | 0.223                   | 0.118                     | 0.682                   | 81.4                        | 11.29          |      |                        |
| Rxn #44 | B4   | AnalytiCon Plate #2   | B8   | 62.78     | 0.222                   | 0.118                     | 0.682                   | 81.6                        |                |      |                        |
| Rxn #44 | C4   | AnalytiCon Plate #2   | B8   | 41.85     | 0.243                   | 0.118                     | 0.682                   | 77.8                        |                |      |                        |
| Rxn #44 | D4   | AnalytiCon Plate #2   | B8   | 20.93     | 0.354                   | 0.118                     | 0.682                   | 58.2                        |                |      |                        |
| Rxn #44 | E4   | AnalytiCon Plate #2   | B8   | 10.46     | 0.425                   | 0.118                     | 0.682                   | 45.6                        |                |      |                        |
| Rxn #44 | F4   | AnalytiCon Plate #2   | B8   | 4.19      | 0.506                   | 0.118                     | 0.682                   | 31.2                        |                |      |                        |
| Rxn #44 | G4   | AnalytiCon Plate #2   | B8   | 2.09      | 0.579                   | 0.118                     | 0.682                   | 18.3                        |                |      |                        |
| Rxn #44 | H4   | AnalytiCon Plate #2   | B8   | 0.04      | 0.701                   | 0.118                     | 0.682                   | -3.4                        |                |      |                        |
| Rxn #44 | A5   | AnalytiCon Plate #2   | C8   | 73.05     | 0.454                   | 0.118                     | 0.682                   | 40.4                        | 1.00           |      |                        |
| Rxn #44 | B5   | AnalytiCon Plate #2   | C8   | 54.79     | 0.348                   | 0.118                     | 0.682                   | 59.2                        |                |      |                        |
| Rxn #44 | C5   | AnalytiCon Plate #2   | C8   | 36.53     | 0.387                   | 0.118                     | 0.682                   | 52.3                        |                |      |                        |
| Rxn #44 | D5   | AnalytiCon Plate #2   | C8   | 18.26     | 0.349                   | 0.118                     | 0.682                   | 59.0                        |                |      |                        |
| Rxn #44 | E5   | AnalytiCon Plate #2   | C8   | 9.13      | 0.349                   | 0.118                     | 0.682                   | 59.0                        |                |      |                        |
| Rxn #44 | F5   | AnalytiCon Plate #2   | C8   | 3.65      | 0.392                   | 0.118                     | 0.682                   | 51.4                        |                |      |                        |
| Rxn #44 | G5   | AnalytiCon Plate #2   | C8   | 1.83      | 0.439                   | 0.118                     | 0.682                   | 43.1                        |                |      |                        |
| Rxn #44 | H5   | AnalytiCon Plate #2   | C8   | 0.04      | 0.700                   | 0.118                     | 0.682                   | -3.2                        |                |      |                        |
| Rxn #44 | A6   | AnalytiCon Plate #2   | G10  | 122.8     | 0.286                   | 0.118                     | 0.682                   | 70.2                        | 0.65           |      |                        |
| Rxn #44 | B6   | AnalytiCon Plate #2   | G10  | 92.1      | 0.252                   | 0.118                     | 0.682                   | 76.2                        |                |      |                        |
| Rxn #44 | C6   | AnalytiCon Plate #2   | G10  | 61.4      | 0.223                   | 0.118                     | 0.682                   | 81.4                        |                |      |                        |
| Rxn #44 | D6   | AnalytiCon Plate #2   | G10  | 30.7      | 0.170                   | 0.118                     | 0.682                   | 90.8                        |                |      |                        |
| Rxn #44 | E6   | AnalytiCon Plate #2   | G10  | 15.35     | 0.173                   | 0.118                     | 0.682                   | 90.2                        |                |      |                        |
| Rxn #44 | F6   | AnalytiCon Plate #2   | G10  | 6.14      | 0.221                   | 0.118                     | 0.682                   | 81.7                        |                |      |                        |
| Rxn #44 | G6   | AnalytiCon Plate #2   | G10  | 3.07      | 0.299                   | 0.118                     | 0.682                   | 67.9                        |                |      |                        |
| Rxn #44 | H6   | AnalytiCon Plate #2   | G10  | 0.06      | 0.665                   | 0.118                     | 0.682                   | 3.0                         |                |      |                        |
| Rxn #44 | A7   | AnalytiCon Plate #10  | B11  | 92.45     | 0.290                   | 0.118                     | 0.682                   | 69.5                        | 5.70           |      |                        |
| Rxn #44 | B7   | AnalytiCon Plate #10  | B11  | 69.34     | 0.261                   | 0.118                     | 0.682                   | 74.6                        |                |      |                        |
| Rxn #44 | C7   | AnalytiCon Plate #10  | B11  | 46.23     | 0.239                   | 0.118                     | 0.682                   | 78.5                        |                |      |                        |
| Rxn #44 | D7   | AnalytiCon Plate #10  | B11  | 23.11     | 0.271                   | 0.118                     | 0.682                   | 72.9                        |                |      |                        |
| Rxn #44 | E7   | AnalytiCon Plate #10  | B11  | 11.56     | 0.356                   | 0.118                     | 0.682                   | 57.8                        |                |      |                        |
| Rxn #44 | F7   | AnalytiCon Plate #10  | B11  | 4.62      | 0.458                   | 0.118                     | 0.682                   | 39.7                        |                |      |                        |
| Rxn #44 | G7   | AnalytiCon Plate #10  | B11  | 2.31      | 0.562                   | 0.118                     | 0.682                   | 21.3                        |                |      |                        |
| Rxn #44 | H7   | AnalytiCon Plate #10  | B11  | 0.05      | 0.721                   | 0.118                     | 0.682                   | -6.9                        |                |      |                        |
| Rxn #44 | A10  | No Fructose Control   |      |           | 0.118                   | 0.118                     | 0.682                   | 100.0                       |                |      |                        |
| Rxn #44 | B10  | No Fructose Control   |      |           | 0.111                   | 0.118                     | 0.682                   | 101.2                       |                |      |                        |
| Rxn #44 | C10  | No Fructose Control   |      |           | 0.130                   | 0.118                     | 0.682                   | 97.9                        |                |      |                        |
| Rxn #44 | D10  | No Fructose Control   |      |           | 0.106                   | 0.118                     | 0.682                   | 102.1                       |                |      |                        |
| Rxn #44 | E10  | No Fructose Control   |      |           | 0.109                   | 0.118                     | 0.682                   | 101.6                       |                |      |                        |
| Rxn #44 | F10  | No Fructose Control   |      |           | 0.135                   | 0.118                     | 0.682                   | 97.0                        |                |      |                        |
| Rxn #44 | G10  | No Fructose Control   |      |           | 0.122                   | 0.118                     | 0.682                   | 99.3                        |                |      |                        |
| Rxn #44 | H10  | No Fructose Control   |      |           | 0.112                   | 0.118                     | 0.682                   | 101.1                       |                |      |                        |
| Rxn #44 | A11  | Fructose Only Control |      |           | 0.690                   | 0.118                     | 0.682                   | -1.4                        |                |      |                        |
| Rxn #44 | B11  | Fructose Only Control |      |           | 0.678                   | 0.118                     | 0.682                   | 0.7                         |                |      |                        |
| Rxn #44 | C11  | Fructose Only Control |      |           | 0.669                   | 0.118                     | 0.682                   | 2.3                         |                |      |                        |
| Rxn #44 | D11  | Fructose Only Control |      |           | 0.691                   | 0.118                     | 0.682                   | -1.6                        |                |      |                        |
| Rxn #44 | E11  | Fructose Only Control |      |           | 0.675                   | 0.118                     | 0.682                   | 1.2                         |                |      |                        |
| Rxn #44 | F11  | Fructose Only Control |      |           | 0.698                   | 0.118                     | 0.682                   | -2.8                        |                |      |                        |
| Rxn #44 | G11  | Fructose Only Control |      |           | 0.693                   | 0.118                     | 0.682                   | -2.0                        |                |      |                        |
| Rxn #44 | H11  | Fructose Only Control |      |           | 0.662                   | 0.118                     | 0.682                   | 3.5                         |                |      |                        |
| Rxn #45 | A1   | AnalytiCon Plate #3   | E1   | 105.5     | 0.337                   | 0.111                     | 0.628                   | 56.3                        | 8.21           |      |                        |
| Rxn #45 | B1   | AnalytiCon Plate #3   | E1   | 79.13     | 0.325                   | 0.111                     | 0.628                   | 58.6                        |                |      |                        |
| Rxn #45 | C1   | AnalytiCon Plate #3   | E1   | 52.75     | 0.272                   | 0.111                     | 0.628                   | 68.9                        |                |      |                        |
| Rxn #45 | D1   | AnalytiCon Plate #3   | E1   | 26.38     | 0.296                   | 0.111                     | 0.628                   | 64.2                        |                |      |                        |
| Rxn #45 | E1   | AnalytiCon Plate #3   | E1   | 13.19     | 0.341                   | 0.111                     | 0.628                   | 55.5                        |                |      |                        |
| Rxn #45 | F1   | AnalytiCon Plate #3   | E1   | 5.28      | 0.448                   | 0.111                     | 0.628                   | 34.8                        |                |      |                        |
| Rxn #45 | G1   | AnalytiCon Plate #3   | E1   | 2.64      | 0.511                   | 0.111                     | 0.628                   | 22.6                        |                |      |                        |
| Rxn #45 | H1   | AnalytiCon Plate #3   | E1   | 0.05      | 0.589                   | 0.111                     | 0.628                   | 7.5                         |                |      |                        |
| Rxn #45 | A2   | AnalytiCon Plate #3   | D7   | 71        | 0.289                   | 0.111                     | 0.628                   | 65.6                        | 31.24          |      |                        |

**S4 Table. Data from Titrations of Candidate Phytochemicals for Inhibition of KHKC Activity.**

| Rxn     |      | Sample                |      |           | Sample                  | Ave. No Fructose Controls | Ave. Fructose Only Controls | KHKC           | *KHKC IC <sub>50</sub> |
|---------|------|-----------------------|------|-----------|-------------------------|---------------------------|-----------------------------|----------------|------------------------|
| ID      | Well | Phytochemical Plate   | Well | Conc (μM) | ( OD <sub>340nm</sub> ) | ( OD <sub>340nm</sub> )   | ( OD <sub>340nm</sub> )     | Inhibition (%) | (μM)                   |
| Rxn #45 | B2   | AnalytiCon Plate #3   | D7   | 53.25     | 0.327                   | 0.111                     | 0.628                       | 58.2           |                        |
| Rxn #45 | C2   | AnalytiCon Plate #3   | D7   | 35.5      | 0.349                   | 0.111                     | 0.628                       | 54.0           |                        |
| Rxn #45 | D2   | AnalytiCon Plate #3   | D7   | 17.75     | 0.430                   | 0.111                     | 0.628                       | 38.3           |                        |
| Rxn #45 | E2   | AnalytiCon Plate #3   | D7   | 8.88      | 0.429                   | 0.111                     | 0.628                       | 38.5           |                        |
| Rxn #45 | F2   | AnalytiCon Plate #3   | D7   | 3.55      | 0.523                   | 0.111                     | 0.628                       | 20.3           |                        |
| Rxn #45 | G2   | AnalytiCon Plate #3   | D7   | 1.78      | 0.568                   | 0.111                     | 0.628                       | 11.6           |                        |
| Rxn #45 | H2   | AnalytiCon Plate #3   | D7   | 0.04      | 0.602                   | 0.111                     | 0.628                       | 5.0            |                        |
| Rxn #45 | A3   | AnalytiCon Plate #4   | F3   | 67.2      | 0.312                   | 0.111                     | 0.628                       | 61.1           | 16.13                  |
| Rxn #45 | B3   | AnalytiCon Plate #4   | F3   | 50.4      | 0.307                   | 0.111                     | 0.628                       | 62.1           |                        |
| Rxn #45 | C3   | AnalytiCon Plate #4   | F3   | 33.6      | 0.290                   | 0.111                     | 0.628                       | 65.4           |                        |
| Rxn #45 | D3   | AnalytiCon Plate #4   | F3   | 16.8      | 0.378                   | 0.111                     | 0.628                       | 48.4           |                        |
| Rxn #45 | E3   | AnalytiCon Plate #4   | F3   | 8.4       | 0.424                   | 0.111                     | 0.628                       | 39.5           |                        |
| Rxn #45 | F3   | AnalytiCon Plate #4   | F3   | 3.36      | 0.529                   | 0.111                     | 0.628                       | 19.1           |                        |
| Rxn #45 | G3   | AnalytiCon Plate #4   | F3   | 1.68      | 0.581                   | 0.111                     | 0.628                       | 9.1            |                        |
| Rxn #45 | H3   | AnalytiCon Plate #4   | F3   | 0.03      | 0.641                   | 0.111                     | 0.628                       | -2.5           |                        |
| Rxn #45 | A4   | AnalytiCon Plate #4   | C9   | 84.65     | 0.355                   | 0.111                     | 0.628                       | 52.8           | 0.19                   |
| Rxn #45 | B4   | AnalytiCon Plate #4   | C9   | 63.49     | 0.354                   | 0.111                     | 0.628                       | 53.0           |                        |
| Rxn #45 | C4   | AnalytiCon Plate #4   | C9   | 42.33     | 0.334                   | 0.111                     | 0.628                       | 56.9           |                        |
| Rxn #45 | D4   | AnalytiCon Plate #4   | C9   | 21.16     | 0.291                   | 0.111                     | 0.628                       | 65.2           |                        |
| Rxn #45 | E4   | AnalytiCon Plate #4   | C9   | 10.58     | 0.206                   | 0.111                     | 0.628                       | 81.6           |                        |
| Rxn #45 | F4   | AnalytiCon Plate #4   | C9   | 4.23      | 0.204                   | 0.111                     | 0.628                       | 82.0           |                        |
| Rxn #45 | G4   | AnalytiCon Plate #4   | C9   | 2.12      | 0.267                   | 0.111                     | 0.628                       | 69.8           |                        |
| Rxn #45 | H4   | AnalytiCon Plate #4   | C9   | 0.04      | 0.616                   | 0.111                     | 0.628                       | 2.3            |                        |
| Rxn #45 | A5   | AnalytiCon Plate #4   | F2   | 75.65     | 0.268                   | 0.111                     | 0.628                       | 69.6           | 1.49                   |
| Rxn #45 | B5   | AnalytiCon Plate #4   | F2   | 56.74     | 0.203                   | 0.111                     | 0.628                       | 82.2           |                        |
| Rxn #45 | C5   | AnalytiCon Plate #4   | F2   | 37.83     | 0.211                   | 0.111                     | 0.628                       | 80.7           |                        |
| Rxn #45 | D5   | AnalytiCon Plate #4   | F2   | 18.91     | 0.225                   | 0.111                     | 0.628                       | 77.9           |                        |
| Rxn #45 | E5   | AnalytiCon Plate #4   | F2   | 9.46      | 0.212                   | 0.111                     | 0.628                       | 80.5           |                        |
| Rxn #45 | F5   | AnalytiCon Plate #4   | F2   | 3.78      | 0.309                   | 0.111                     | 0.628                       | 61.7           |                        |
| Rxn #45 | G5   | AnalytiCon Plate #4   | F2   | 1.89      | 0.395                   | 0.111                     | 0.628                       | 45.1           |                        |
| Rxn #45 | H5   | AnalytiCon Plate #4   | F2   | 0.04      | 0.651                   | 0.111                     | 0.628                       | -4.4           |                        |
| Rxn #45 | A6   | AnalytiCon Plate #5   | G10  | 130.25    | 0.196                   | 0.111                     | 0.628                       | 83.6           | 7.77                   |
| Rxn #45 | B6   | AnalytiCon Plate #5   | G10  | 97.69     | 0.188                   | 0.111                     | 0.628                       | 85.1           |                        |
| Rxn #45 | C6   | AnalytiCon Plate #5   | G10  | 65.13     | 0.189                   | 0.111                     | 0.628                       | 84.9           |                        |
| Rxn #45 | D6   | AnalytiCon Plate #5   | G10  | 32.56     | 0.230                   | 0.111                     | 0.628                       | 77.0           |                        |
| Rxn #45 | E6   | AnalytiCon Plate #5   | G10  | 16.28     | 0.276                   | 0.111                     | 0.628                       | 68.1           |                        |
| Rxn #45 | F6   | AnalytiCon Plate #5   | G10  | 6.51      | 0.413                   | 0.111                     | 0.628                       | 41.6           |                        |
| Rxn #45 | G6   | AnalytiCon Plate #5   | G10  | 3.26      | 0.487                   | 0.111                     | 0.628                       | 27.3           |                        |
| Rxn #45 | H6   | AnalytiCon Plate #5   | G10  | 0.07      | 0.623                   | 0.111                     | 0.628                       | 1.0            |                        |
| Rxn #45 | A7   | AnalytiCon Plate #6   | E1   | 53.15     | 0.322                   | 0.111                     | 0.628                       | 59.2           | 21.52                  |
| Rxn #45 | B7   | AnalytiCon Plate #6   | E1   | 39.86     | 0.317                   | 0.111                     | 0.628                       | 60.2           |                        |
| Rxn #45 | C7   | AnalytiCon Plate #6   | E1   | 26.58     | 0.341                   | 0.111                     | 0.628                       | 55.5           |                        |
| Rxn #45 | D7   | AnalytiCon Plate #6   | E1   | 13.29     | 0.406                   | 0.111                     | 0.628                       | 42.9           |                        |
| Rxn #45 | E7   | AnalytiCon Plate #6   | E1   | 6.64      | 0.454                   | 0.111                     | 0.628                       | 33.7           |                        |
| Rxn #45 | F7   | AnalytiCon Plate #6   | E1   | 2.66      | 0.567                   | 0.111                     | 0.628                       | 11.8           |                        |
| Rxn #45 | G7   | AnalytiCon Plate #6   | E1   | 1.33      | 0.624                   | 0.111                     | 0.628                       | 0.8            |                        |
| Rxn #45 | H7   | AnalytiCon Plate #6   | E1   | 0.03      | 0.595                   | 0.111                     | 0.628                       | 6.4            |                        |
| Rxn #45 | A10  | No Fructose Control   |      |           | 0.142                   | 0.111                     | 0.628                       | 94.0           |                        |
| Rxn #45 | B10  | No Fructose Control   |      |           | 0.109                   | 0.111                     | 0.628                       | 100.4          |                        |
| Rxn #45 | C10  | No Fructose Control   |      |           | 0.105                   | 0.111                     | 0.628                       | 101.2          |                        |
| Rxn #45 | D10  | No Fructose Control   |      |           | 0.105                   | 0.111                     | 0.628                       | 101.2          |                        |
| Rxn #45 | E10  | No Fructose Control   |      |           | 0.090                   | 0.111                     | 0.628                       | 104.1          |                        |
| Rxn #45 | F10  | No Fructose Control   |      |           | 0.107                   | 0.111                     | 0.628                       | 100.8          |                        |
| Rxn #45 | G10  | No Fructose Control   |      |           | 0.101                   | 0.111                     | 0.628                       | 101.9          |                        |
| Rxn #45 | H10  | No Fructose Control   |      |           | 0.128                   | 0.111                     | 0.628                       | 96.7           |                        |
| Rxn #45 | A11  | Fructose Only Control |      |           | 0.645                   | 0.111                     | 0.628                       | -3.3           |                        |
| Rxn #45 | B11  | Fructose Only Control |      |           | 0.622                   | 0.111                     | 0.628                       | 1.2            |                        |
| Rxn #45 | C11  | Fructose Only Control |      |           | 0.636                   | 0.111                     | 0.628                       | -1.5           |                        |
| Rxn #45 | D11  | Fructose Only Control |      |           | 0.627                   | 0.111                     | 0.628                       | 0.2            |                        |
| Rxn #45 | E11  | Fructose Only Control |      |           | 0.598                   | 0.111                     | 0.628                       | 5.8            |                        |
| Rxn #45 | F11  | Fructose Only Control |      |           | 0.631                   | 0.111                     | 0.628                       | -0.6           |                        |
| Rxn #45 | G11  | Fructose Only Control |      |           | 0.634                   | 0.111                     | 0.628                       | -1.2           |                        |
| Rxn #45 | H11  | Fructose Only Control |      |           | 0.634                   | 0.111                     | 0.628                       | -1.2           |                        |
| Rxn #56 | A1   | AnalytiCon Plate #13  | G6   | 123.8     | 0.230                   | 0.0795                    | 0.609                       | 71.6           | 58.36                  |
| Rxn #56 | B1   | AnalytiCon Plate #13  | G6   | 92.85     | 0.271                   | 0.0795                    | 0.609                       | 63.8           |                        |
| Rxn #56 | C1   | AnalytiCon Plate #13  | G6   | 61.9      | 0.353                   | 0.0795                    | 0.609                       | 48.3           |                        |
| Rxn #56 | D1   | AnalytiCon Plate #13  | G6   | 30.95     | 0.406                   | 0.0795                    | 0.609                       | 38.3           |                        |
| Rxn #56 | E1   | AnalytiCon Plate #13  | G6   | 15.48     | 0.470                   | 0.0795                    | 0.609                       | 26.3           |                        |
| Rxn #56 | F1   | AnalytiCon Plate #13  | G6   | 6.19      | 0.524                   | 0.0795                    | 0.609                       | 16.1           |                        |
| Rxn #56 | G1   | AnalytiCon Plate #13  | G6   | 3.1       | 0.565                   | 0.0795                    | 0.609                       | 8.3            |                        |
| Rxn #56 | H1   | AnalytiCon Plate #13  | G6   | 0.06      | 0.580                   | 0.0795                    | 0.609                       | 5.5            |                        |
| Rxn #56 | A2   | No Fructose Control   |      |           | 0.086                   | 0.0795                    | 0.609                       | 98.8           |                        |
| Rxn #56 | B2   | No Fructose Control   |      |           | 0.077                   | 0.0795                    | 0.609                       | 100.5          |                        |
| Rxn #56 | C2   | No Fructose Control   |      |           | 0.081                   | 0.0795                    | 0.609                       | 99.7           |                        |
| Rxn #56 | D2   | No Fructose Control   |      |           | 0.076                   | 0.0795                    | 0.609                       | 100.7          |                        |
| Rxn #56 | E2   | No Fructose Control   |      |           | 0.080                   | 0.0795                    | 0.609                       | 99.9           |                        |
| Rxn #56 | F2   | No Fructose Control   |      |           | 0.078                   | 0.0795                    | 0.609                       | 100.3          |                        |
| Rxn #56 | G2   | No Fructose Control   |      |           | 0.076                   | 0.0795                    | 0.609                       | 100.7          |                        |
| Rxn #56 | H2   | No Fructose Control   |      |           | 0.082                   | 0.0795                    | 0.609                       | 99.5           |                        |
| Rxn #56 | A10  | Fructose Only Control |      |           | 0.618                   | 0.0795                    | 0.609                       | -1.7           |                        |
| Rxn #56 | B10  | Fructose Only Control |      |           | 0.611                   | 0.0795                    | 0.609                       | -0.4           |                        |

**S4 Table. Data from Titrations of Candidate Phytochemicals for Inhibition of KHKC Activity.**

| Rxn     |      | Sample              |                       |           | Sample                  | Ave. No Fructose Controls | Ave. Fructose Only Controls | KHKC           | *KHKC IC <sub>50</sub> |
|---------|------|---------------------|-----------------------|-----------|-------------------------|---------------------------|-----------------------------|----------------|------------------------|
| ID      | Well | Phytochemical Plate | Well                  | Conc (μM) | ( OD <sub>340nm</sub> ) | ( OD <sub>340nm</sub> )   | ( OD <sub>340nm</sub> )     | Inhibition (%) | (μM)                   |
| Rxn #56 | C10  |                     | Fructose Only Control |           | 0.610                   | 0.0795                    | 0.609                       | -0.2           |                        |
| Rxn #56 | D10  |                     | Fructose Only Control |           | 0.569                   | 0.0795                    | 0.609                       | 7.6            |                        |
| Rxn #56 | E10  |                     | Fructose Only Control |           | 0.611                   | 0.0795                    | 0.609                       | -0.4           |                        |
| Rxn #56 | F10  |                     | Fructose Only Control |           | 0.612                   | 0.0795                    | 0.609                       | -0.6           |                        |
| Rxn #56 | G10  |                     | Fructose Only Control |           | 0.618                   | 0.0795                    | 0.609                       | -1.7           |                        |
| Rxn #56 | H10  |                     | Fructose Only Control |           | 0.621                   | 0.0795                    | 0.609                       | -2.3           |                        |

AnalytiCon: Phytochemicals from MEGx library (AnalytiCon Discovery GmbH, Potsdam, Germany) were selected and purchased by Amway Corp.

IC<sub>50</sub>: half maximal inhibitory concentration. OD: optical density.

\*KHKC IC<sub>50</sub>s were calculated using nonlinear regression (three parameters) in GraphPad Prism 5.03. To generate a best fit, an upper concentration (10,000 μg/mL at 100% inhibition) and a lower concentration (0.001 μg/mL at 0% inhibition) were added.
