# Supplementary material for: Bioactivity-Guided Identification of Botanical Inhibitors of Ketohexokinase
Source: PubMed Central journal article supplement (PMC4913896; doi:10.1371/journal.pone.0157458), 2016-06-20
Supplement: pone.0157458.s005.pdf [file pone.0157458.s005.pdf]

**S5 Table. Data from Titrations of Top Botanical Candidates for Inhibition of KHKC Activity.**

| Rxn     |      | Botanical Extract |                       |          |       | Sample       | Ave. No Fructose Controls | Ave. Fructose Only Controls | KHKC                    | *KHKC IC <sub>50</sub> |         |
|---------|------|-------------------|-----------------------|----------|-------|--------------|---------------------------|-----------------------------|-------------------------|------------------------|---------|
| ID      | Well | Genus             | Species               | SampleID | Lot # | Conc (µg/mL) | ( OD <sub>340nm</sub> )   | ( OD <sub>340nm</sub> )     | ( OD <sub>340nm</sub> ) | Inhibition (%)         | (µg/mL) |
| Rxn #65 | A1   | Angelica          | archangelica          | 1        | 1     | 200          | 0.242                     | 0.0665                      | 0.532                   | 62.3                   | 90.38   |
| Rxn #65 | B1   | Angelica          | archangelica          | 1        | 1     | 100          | 0.301                     | 0.0665                      | 0.532                   | 49.6                   |         |
| Rxn #65 | C1   | Angelica          | archangelica          | 1        | 1     | 75           | 0.342                     | 0.0665                      | 0.532                   | 40.8                   |         |
| Rxn #65 | D1   | Angelica          | archangelica          | 1        | 1     | 50           | 0.393                     | 0.0665                      | 0.532                   | 29.9                   |         |
| Rxn #65 | E1   | Angelica          | archangelica          | 1        | 1     | 25           | 0.456                     | 0.0665                      | 0.532                   | 16.3                   |         |
| Rxn #65 | F1   | Angelica          | archangelica          | 1        | 1     | 10           | 0.519                     | 0.0665                      | 0.532                   | 2.8                    |         |
| Rxn #65 | G1   | Angelica          | archangelica          | 1        | 1     | 1            | 0.588                     | 0.0665                      | 0.532                   | -12.0                  |         |
| Rxn #65 | H1   | Angelica          | archangelica          | 1        | 1     | 0.1          | 0.603                     | 0.0665                      | 0.532                   | -15.3                  |         |
| Rxn #65 | A2   | Angelica          | archangelica          | 1        | 1     | 200          | 0.231                     | 0.0665                      | 0.532                   | 64.7                   | 95.55   |
| Rxn #65 | B2   | Angelica          | archangelica          | 1        | 1     | 100          | 0.297                     | 0.0665                      | 0.532                   | 50.5                   |         |
| Rxn #65 | C2   | Angelica          | archangelica          | 1        | 1     | 75           | 0.350                     | 0.0665                      | 0.532                   | 39.1                   |         |
| Rxn #65 | D2   | Angelica          | archangelica          | 1        | 1     | 50           | 0.396                     | 0.0665                      | 0.532                   | 29.2                   |         |
| Rxn #65 | E2   | Angelica          | archangelica          | 1        | 1     | 25           | 0.475                     | 0.0665                      | 0.532                   | 12.2                   |         |
| Rxn #65 | F2   | Angelica          | archangelica          | 1        | 1     | 10           | 0.533                     | 0.0665                      | 0.532                   | -0.2                   |         |
| Rxn #65 | G2   | Angelica          | archangelica          | 1        | 1     | 1            | 0.577                     | 0.0665                      | 0.532                   | -9.7                   |         |
| Rxn #65 | H2   | Angelica          | archangelica          | 1        | 1     | 0.1          | 0.595                     | 0.0665                      | 0.532                   | -13.5                  |         |
| Rxn #65 | A3   | Angelica          | archangelica          | 1        | 1     | 200          | 0.242                     | 0.0665                      | 0.532                   | 62.3                   | 98.60   |
| Rxn #65 | B3   | Angelica          | archangelica          | 1        | 1     | 100          | 0.304                     | 0.0665                      | 0.532                   | 49.0                   |         |
| Rxn #65 | C3   | Angelica          | archangelica          | 1        | 1     | 75           | 0.353                     | 0.0665                      | 0.532                   | 38.5                   |         |
| Rxn #65 | D3   | Angelica          | archangelica          | 1        | 1     | 50           | 0.403                     | 0.0665                      | 0.532                   | 27.7                   |         |
| Rxn #65 | E3   | Angelica          | archangelica          | 1        | 1     | 25           | 0.486                     | 0.0665                      | 0.532                   | 9.9                    |         |
| Rxn #65 | F3   | Angelica          | archangelica          | 1        | 1     | 10           | 0.535                     | 0.0665                      | 0.532                   | -0.6                   |         |
| Rxn #65 | G3   | Angelica          | archangelica          | 1        | 1     | 1            | 0.593                     | 0.0665                      | 0.532                   | -13.1                  |         |
| Rxn #65 | H3   | Angelica          | archangelica          | 1        | 1     | 0.1          | 0.598                     | 0.0665                      | 0.532                   | -14.2                  |         |
| Rxn #65 | A10  |                   | No Fructose Control   |          |       |              | 0.062                     | 0.0665                      | 0.532                   | 101.0                  |         |
| Rxn #65 | B10  |                   | No Fructose Control   |          |       |              | 0.072                     | 0.0665                      | 0.532                   | 98.8                   |         |
| Rxn #65 | C10  |                   | No Fructose Control   |          |       |              | 0.070                     | 0.0665                      | 0.532                   | 99.2                   |         |
| Rxn #65 | D10  |                   | No Fructose Control   |          |       |              | 0.067                     | 0.0665                      | 0.532                   | 99.9                   |         |
| Rxn #65 | E10  |                   | No Fructose Control   |          |       |              | 0.068                     | 0.0665                      | 0.532                   | 99.7                   |         |
| Rxn #65 | F10  |                   | No Fructose Control   |          |       |              | 0.067                     | 0.0665                      | 0.532                   | 99.9                   |         |
| Rxn #65 | G10  |                   | No Fructose Control   |          |       |              | 0.072                     | 0.0665                      | 0.532                   | 98.8                   |         |
| Rxn #65 | H10  |                   | No Fructose Control   |          |       |              | 0.054                     | 0.0665                      | 0.532                   | 102.7                  |         |
| Rxn #65 | A11  |                   | Fructose Only Control |          |       |              | 0.476                     | 0.0665                      | 0.532                   | 12.0                   |         |
| Rxn #65 | B11  |                   | Fructose Only Control |          |       |              | 0.486                     | 0.0665                      | 0.532                   | 9.9                    |         |
| Rxn #65 | C11  |                   | Fructose Only Control |          |       |              | 0.537                     | 0.0665                      | 0.532                   | -1.1                   |         |
| Rxn #65 | D11  |                   | Fructose Only Control |          |       |              | 0.562                     | 0.0665                      | 0.532                   | -6.4                   |         |
| Rxn #65 | E11  |                   | Fructose Only Control |          |       |              | 0.568                     | 0.0665                      | 0.532                   | -7.7                   |         |
| Rxn #65 | F11  |                   | Fructose Only Control |          |       |              | 0.571                     | 0.0665                      | 0.532                   | -8.4                   |         |
| Rxn #65 | G11  |                   | Fructose Only Control |          |       |              | 0.546                     | 0.0665                      | 0.532                   | -3.0                   |         |
| Rxn #65 | H11  |                   | Fructose Only Control |          |       |              | 0.511                     | 0.0665                      | 0.532                   | 4.5                    |         |
| Rxn #66 | A1   | Scutellaria       | baicalensis           | 4        | 1     | 200          | 0.254                     | 0.0699                      | 0.463                   | 53.2                   | 117.00  |
| Rxn #66 | B1   | Scutellaria       | baicalensis           | 4        | 1     | 100          | 0.292                     | 0.0699                      | 0.463                   | 43.5                   |         |
| Rxn #66 | C1   | Scutellaria       | baicalensis           | 4        | 1     | 75           | 0.312                     | 0.0699                      | 0.463                   | 38.4                   |         |
| Rxn #66 | D1   | Scutellaria       | baicalensis           | 4        | 1     | 50           | 0.337                     | 0.0699                      | 0.463                   | 32.1                   |         |
| Rxn #66 | E1   | Scutellaria       | baicalensis           | 4        | 1     | 25           | 0.386                     | 0.0699                      | 0.463                   | 19.6                   |         |
| Rxn #66 | F1   | Scutellaria       | baicalensis           | 4        | 1     | 10           | 0.430                     | 0.0699                      | 0.463                   | 8.4                    |         |
| Rxn #66 | G1   | Scutellaria       | baicalensis           | 4        | 1     | 1            | 0.479                     | 0.0699                      | 0.463                   | -4.1                   |         |
| Rxn #66 | H1   | Scutellaria       | baicalensis           | 4        | 1     | 0.1          | 0.497                     | 0.0699                      | 0.463                   | -8.6                   |         |
| Rxn #66 | A2   | Scutellaria       | baicalensis           | 4        | 1     | 200          | 0.248                     | 0.0699                      | 0.463                   | 54.7                   | 120.60  |
| Rxn #66 | B2   | Scutellaria       | baicalensis           | 4        | 1     | 100          | 0.280                     | 0.0699                      | 0.463                   | 46.6                   |         |
| Rxn #66 | C2   | Scutellaria       | baicalensis           | 4        | 1     | 75           | 0.315                     | 0.0699                      | 0.463                   | 37.6                   |         |
| Rxn #66 | D2   | Scutellaria       | baicalensis           | 4        | 1     | 50           | 0.327                     | 0.0699                      | 0.463                   | 34.6                   |         |
| Rxn #66 | E2   | Scutellaria       | baicalensis           | 4        | 1     | 25           | 0.375                     | 0.0699                      | 0.463                   | 22.4                   |         |
| Rxn #66 | F2   | Scutellaria       | baicalensis           | 4        | 1     | 10           | 0.417                     | 0.0699                      | 0.463                   | 11.7                   |         |
| Rxn #66 | G2   | Scutellaria       | baicalensis           | 4        | 1     | 1            | 0.453                     | 0.0699                      | 0.463                   | 2.5                    |         |
| Rxn #66 | H2   | Scutellaria       | baicalensis           | 4        | 1     | 0.1          | 0.477                     | 0.0699                      | 0.463                   | -3.6                   |         |
| Rxn #66 | A3   | Scutellaria       | baicalensis           | 4        | 1     | 200          | 0.258                     | 0.0699                      | 0.463                   | 52.1                   | 126.20  |
| Rxn #66 | B3   | Scutellaria       | baicalensis           | 4        | 1     | 100          | 0.287                     | 0.0699                      | 0.463                   | 44.8                   |         |
| Rxn #66 | C3   | Scutellaria       | baicalensis           | 4        | 1     | 75           | 0.305                     | 0.0699                      | 0.463                   | 40.2                   |         |
| Rxn #66 | D3   | Scutellaria       | baicalensis           | 4        | 1     | 50           | 0.341                     | 0.0699                      | 0.463                   | 31.0                   |         |
| Rxn #66 | E3   | Scutellaria       | baicalensis           | 4        | 1     | 25           | 0.374                     | 0.0699                      | 0.463                   | 22.6                   |         |
| Rxn #66 | F3   | Scutellaria       | baicalensis           | 4        | 1     | 10           | 0.432                     | 0.0699                      | 0.463                   | 7.9                    |         |
| Rxn #66 | G3   | Scutellaria       | baicalensis           | 4        | 1     | 1            | 0.454                     | 0.0699                      | 0.463                   | 2.3                    |         |
| Rxn #66 | H3   | Scutellaria       | baicalensis           | 4        | 1     | 0.1          | 0.477                     | 0.0699                      | 0.463                   | -3.6                   |         |
| Rxn #66 | A4   | Petroselinum      | crispum               | 6        | 1     | 200          | 0.264                     | 0.0699                      | 0.463                   | 50.6                   | 185.50  |
| Rxn #66 | B4   | Petroselinum      | crispum               | 6        | 1     | 100          | 0.320                     | 0.0699                      | 0.463                   | 36.4                   |         |
| Rxn #66 | C4   | Petroselinum      | crispum               | 6        | 1     | 75           | 0.350                     | 0.0699                      | 0.463                   | 28.7                   |         |
| Rxn #66 | D4   | Petroselinum      | crispum               | 6        | 1     | 50           | 0.386                     | 0.0699                      | 0.463                   | 19.6                   |         |
| Rxn #66 | E4   | Petroselinum      | crispum               | 6        | 1     | 25           | 0.403                     | 0.0699                      | 0.463                   | 15.3                   |         |
| Rxn #66 | F4   | Petroselinum      | crispum               | 6        | 1     | 10           | 0.455                     | 0.0699                      | 0.463                   | 2.0                    |         |
| Rxn #66 | G4   | Petroselinum      | crispum               | 6        | 1     | 1            | 0.460                     | 0.0699                      | 0.463                   | 0.8                    |         |
| Rxn #66 | H4   | Petroselinum      | crispum               | 6        | 1     | 0.1          | 0.475                     | 0.0699                      | 0.463                   | -3.1                   |         |
| Rxn #66 | A5   | Petroselinum      | crispum               | 6        | 1     | 200          | 0.257                     | 0.0699                      | 0.463                   | 52.4                   | 190.10  |
| Rxn #66 | B5   | Petroselinum      | crispum               | 6        | 1     | 100          | 0.336                     | 0.0699                      | 0.463                   | 32.3                   |         |
| Rxn #66 | C5   | Petroselinum      | crispum               | 6        | 1     | 75           | 0.342                     | 0.0699                      | 0.463                   | 30.8                   |         |
| Rxn #66 | D5   | Petroselinum      | crispum               | 6        | 1     | 50           | 0.375                     | 0.0699                      | 0.463                   | 22.4                   |         |
| Rxn #66 | E5   | Petroselinum      | crispum               | 6        | 1     | 25           | 0.408                     | 0.0699                      | 0.463                   | 14.0                   |         |
| Rxn #66 | F5   | Petroselinum      | crispum               | 6        | 1     | 10           | 0.443                     | 0.0699                      | 0.463                   | 5.1                    |         |
| Rxn #66 | G5   | Petroselinum      | crispum               | 6        | 1     | 1            | 0.451                     | 0.0699                      | 0.463                   | 3.1                    |         |
| Rxn #66 | H5   | Petroselinum      | crispum               | 6        | 1     | 0.1          | 0.473                     | 0.0699                      | 0.463                   | -2.5                   |         |
| Rxn #66 | A6   | Petroselinum      | crispum               | 6        | 1     | 200          | 0.253                     | 0.0699                      | 0.463                   | 53.4                   | 180.70  |
| Rxn #66 | B6   | Petroselinum      | crispum               | 6        | 1     | 100          | 0.334                     | 0.0699                      | 0.463                   | 32.8                   |         |
| Rxn #66 | C6   | Petroselinum      | crispum               | 6        | 1     | 75           | 0.343                     | 0.0699                      | 0.463                   | 30.5                   |         |
| Rxn #66 | D6   | Petroselinum      | crispum               | 6        | 1     | 50           | 0.375                     | 0.0699                      | 0.463                   | 22.4                   |         |

**S5 Table. Data from Titrations of Top Botanical Candidates for Inhibition of KHKC Activity.**

| Rxn     |      | Botanical Extract   |                       |          |       | Sample       | Ave. No Fructose Controls | Ave. Fructose Only Controls | KHKC                    | *KHKC IC <sub>50</sub> |         |
|---------|------|---------------------|-----------------------|----------|-------|--------------|---------------------------|-----------------------------|-------------------------|------------------------|---------|
| ID      | Well | Genus               | Species               | SampleID | Lot # | Conc (µg/mL) | ( OD <sub>340nm</sub> )   | ( OD <sub>340nm</sub> )     | ( OD <sub>340nm</sub> ) | Inhibition (%)         | (µg/mL) |
| Rxn #66 | E6   | <i>Petroselinum</i> | <i>crispum</i>        | 6        | 1     | 25           | 0.416                     | 0.0699                      | 0.463                   | 12.0                   |         |
| Rxn #66 | F6   | <i>Petroselinum</i> | <i>crispum</i>        | 6        | 1     | 10           | 0.442                     | 0.0699                      | 0.463                   | 5.3                    |         |
| Rxn #66 | G6   | <i>Petroselinum</i> | <i>crispum</i>        | 6        | 1     | 1            | 0.464                     | 0.0699                      | 0.463                   | -0.3                   |         |
| Rxn #66 | H6   | <i>Petroselinum</i> | <i>crispum</i>        | 6        | 1     | 0.1          | 0.476                     | 0.0699                      | 0.463                   | -3.3                   |         |
| Rxn #66 | A10  |                     | No Fructose Control   |          |       |              | 0.076                     | 0.0699                      | 0.463                   | 98.4                   |         |
| Rxn #66 | B10  |                     | No Fructose Control   |          |       |              | 0.067                     | 0.0699                      | 0.463                   | 100.7                  |         |
| Rxn #66 | C10  |                     | No Fructose Control   |          |       |              | 0.069                     | 0.0699                      | 0.463                   | 100.2                  |         |
| Rxn #66 | D10  |                     | No Fructose Control   |          |       |              | 0.070                     | 0.0699                      | 0.463                   | 100.0                  |         |
| Rxn #66 | E10  |                     | No Fructose Control   |          |       |              | 0.059                     | 0.0699                      | 0.463                   | 102.8                  |         |
| Rxn #66 | F10  |                     | No Fructose Control   |          |       |              | 0.070                     | 0.0699                      | 0.463                   | 100.0                  |         |
| Rxn #66 | G10  |                     | No Fructose Control   |          |       |              | 0.072                     | 0.0699                      | 0.463                   | 99.5                   |         |
| Rxn #66 | H10  |                     | No Fructose Control   |          |       |              | 0.076                     | 0.0699                      | 0.463                   | 98.4                   |         |
| Rxn #66 | A11  |                     | Fructose Only Control |          |       |              | 0.459                     | 0.0699                      | 0.463                   | 1.0                    |         |
| Rxn #66 | B11  |                     | Fructose Only Control |          |       |              | 0.468                     | 0.0699                      | 0.463                   | -1.3                   |         |
| Rxn #66 | C11  |                     | Fructose Only Control |          |       |              | 0.458                     | 0.0699                      | 0.463                   | 1.3                    |         |
| Rxn #66 | D11  |                     | Fructose Only Control |          |       |              | 0.456                     | 0.0699                      | 0.463                   | 1.8                    |         |
| Rxn #66 | E11  |                     | Fructose Only Control |          |       |              | 0.458                     | 0.0699                      | 0.463                   | 1.3                    |         |
| Rxn #66 | F11  |                     | Fructose Only Control |          |       |              | 0.462                     | 0.0699                      | 0.463                   | 0.3                    |         |
| Rxn #66 | G11  |                     | Fructose Only Control |          |       |              | 0.465                     | 0.0699                      | 0.463                   | -0.5                   |         |
| Rxn #66 | H11  |                     | Fructose Only Control |          |       |              | 0.474                     | 0.0699                      | 0.463                   | -2.8                   |         |
| Rxn #67 | A1   | <i>Garcinia</i>     | <i>mangostana</i>     | 8        | 1     | 200          | 0.168                     | 0.0699                      | 0.525                   | 78.4                   | 18.55   |
| Rxn #67 | B1   | <i>Garcinia</i>     | <i>mangostana</i>     | 8        | 1     | 100          | 0.170                     | 0.0699                      | 0.525                   | 78.0                   |         |
| Rxn #67 | C1   | <i>Garcinia</i>     | <i>mangostana</i>     | 8        | 1     | 75           | 0.175                     | 0.0699                      | 0.525                   | 76.9                   |         |
| Rxn #67 | D1   | <i>Garcinia</i>     | <i>mangostana</i>     | 8        | 1     | 50           | 0.200                     | 0.0699                      | 0.525                   | 71.4                   |         |
| Rxn #67 | E1   | <i>Garcinia</i>     | <i>mangostana</i>     | 8        | 1     | 25           | 0.277                     | 0.0699                      | 0.525                   | 54.5                   |         |
| Rxn #67 | F1   | <i>Garcinia</i>     | <i>mangostana</i>     | 8        | 1     | 10           | 0.414                     | 0.0699                      | 0.525                   | 24.4                   |         |
| Rxn #67 | G1   | <i>Garcinia</i>     | <i>mangostana</i>     | 8        | 1     | 1            | 0.554                     | 0.0699                      | 0.525                   | -6.4                   |         |
| Rxn #67 | H1   | <i>Garcinia</i>     | <i>mangostana</i>     | 8        | 1     | 0.1          | 0.586                     | 0.0699                      | 0.525                   | -13.4                  |         |
| Rxn #67 | A2   | <i>Garcinia</i>     | <i>mangostana</i>     | 8        | 1     | 200          | 0.163                     | 0.0699                      | 0.525                   | 79.5                   | 18.27   |
| Rxn #67 | B2   | <i>Garcinia</i>     | <i>mangostana</i>     | 8        | 1     | 100          | 0.155                     | 0.0699                      | 0.525                   | 81.3                   |         |
| Rxn #67 | C2   | <i>Garcinia</i>     | <i>mangostana</i>     | 8        | 1     | 75           | 0.182                     | 0.0699                      | 0.525                   | 75.4                   |         |
| Rxn #67 | D2   | <i>Garcinia</i>     | <i>mangostana</i>     | 8        | 1     | 50           | 0.195                     | 0.0699                      | 0.525                   | 72.5                   |         |
| Rxn #67 | E2   | <i>Garcinia</i>     | <i>mangostana</i>     | 8        | 1     | 25           | 0.270                     | 0.0699                      | 0.525                   | 56.0                   |         |
| Rxn #67 | F2   | <i>Garcinia</i>     | <i>mangostana</i>     | 8        | 1     | 10           | 0.406                     | 0.0699                      | 0.525                   | 26.1                   |         |
| Rxn #67 | G2   | <i>Garcinia</i>     | <i>mangostana</i>     | 8        | 1     | 1            | 0.550                     | 0.0699                      | 0.525                   | -5.5                   |         |
| Rxn #67 | H2   | <i>Garcinia</i>     | <i>mangostana</i>     | 8        | 1     | 0.1          | 0.569                     | 0.0699                      | 0.525                   | -9.7                   |         |
| Rxn #67 | A3   | <i>Garcinia</i>     | <i>mangostana</i>     | 8        | 1     | 200          | 0.146                     | 0.0699                      | 0.525                   | 83.3                   | 19.38   |
| Rxn #67 | B3   | <i>Garcinia</i>     | <i>mangostana</i>     | 8        | 1     | 100          | 0.162                     | 0.0699                      | 0.525                   | 79.8                   |         |
| Rxn #67 | C3   | <i>Garcinia</i>     | <i>mangostana</i>     | 8        | 1     | 75           | 0.177                     | 0.0699                      | 0.525                   | 76.5                   |         |
| Rxn #67 | D3   | <i>Garcinia</i>     | <i>mangostana</i>     | 8        | 1     | 50           | 0.203                     | 0.0699                      | 0.525                   | 70.8                   |         |
| Rxn #67 | E3   | <i>Garcinia</i>     | <i>mangostana</i>     | 8        | 1     | 25           | 0.275                     | 0.0699                      | 0.525                   | 54.9                   |         |
| Rxn #67 | F3   | <i>Garcinia</i>     | <i>mangostana</i>     | 8        | 1     | 10           | 0.413                     | 0.0699                      | 0.525                   | 24.6                   |         |
| Rxn #67 | G3   | <i>Garcinia</i>     | <i>mangostana</i>     | 8        | 1     | 1            | 0.558                     | 0.0699                      | 0.525                   | -7.3                   |         |
| Rxn #67 | H3   | <i>Garcinia</i>     | <i>mangostana</i>     | 8        | 1     | 0.1          | 0.578                     | 0.0699                      | 0.525                   | -11.6                  |         |
| Rxn #67 | A10  |                     | No Fructose Control   |          |       |              | 0.075                     | 0.0699                      | 0.525                   | 98.9                   |         |
| Rxn #67 | B10  |                     | No Fructose Control   |          |       |              | 0.070                     | 0.0699                      | 0.525                   | 100.0                  |         |
| Rxn #67 | C10  |                     | No Fructose Control   |          |       |              | 0.069                     | 0.0699                      | 0.525                   | 100.2                  |         |
| Rxn #67 | D10  |                     | No Fructose Control   |          |       |              | 0.066                     | 0.0699                      | 0.525                   | 100.9                  |         |
| Rxn #67 | E10  |                     | No Fructose Control   |          |       |              | 0.071                     | 0.0699                      | 0.525                   | 99.8                   |         |
| Rxn #67 | F10  |                     | No Fructose Control   |          |       |              | 0.068                     | 0.0699                      | 0.525                   | 100.4                  |         |
| Rxn #67 | G10  |                     | No Fructose Control   |          |       |              | 0.068                     | 0.0699                      | 0.525                   | 100.4                  |         |
| Rxn #67 | H10  |                     | No Fructose Control   |          |       |              | 0.072                     | 0.0699                      | 0.525                   | 99.5                   |         |
| Rxn #67 | A11  |                     | Fructose Only Control |          |       |              | 0.479                     | 0.0699                      | 0.525                   | 10.1                   |         |
| Rxn #67 | B11  |                     | Fructose Only Control |          |       |              | 0.495                     | 0.0699                      | 0.525                   | 6.6                    |         |
| Rxn #67 | C11  |                     | Fructose Only Control |          |       |              | 0.521                     | 0.0699                      | 0.525                   | 0.9                    |         |
| Rxn #67 | D11  |                     | Fructose Only Control |          |       |              | 0.531                     | 0.0699                      | 0.525                   | -1.3                   |         |
| Rxn #67 | E11  |                     | Fructose Only Control |          |       |              | 0.537                     | 0.0699                      | 0.525                   | -2.6                   |         |
| Rxn #67 | F11  |                     | Fructose Only Control |          |       |              | 0.537                     | 0.0699                      | 0.525                   | -2.6                   |         |
| Rxn #67 | G11  |                     | Fructose Only Control |          |       |              | 0.533                     | 0.0699                      | 0.525                   | -1.8                   |         |
| Rxn #67 | H11  |                     | Fructose Only Control |          |       |              | 0.567                     | 0.0699                      | 0.525                   | -9.2                   |         |
| Rxn #63 | A1   | <i>Angelica</i>     | <i>archangelica</i>   | 1        | 2     | 200          | 0.378                     | 0.0602                      | 0.494                   | 26.7                   | 510.90  |
| Rxn #63 | B1   | <i>Angelica</i>     | <i>archangelica</i>   | 1        | 2     | 100          | 0.442                     | 0.0602                      | 0.494                   | 12.0                   |         |
| Rxn #63 | C1   | <i>Angelica</i>     | <i>archangelica</i>   | 1        | 2     | 75           | 0.452                     | 0.0602                      | 0.494                   | 9.7                    |         |
| Rxn #63 | D1   | <i>Angelica</i>     | <i>archangelica</i>   | 1        | 2     | 50           | 0.469                     | 0.0602                      | 0.494                   | 5.8                    |         |
| Rxn #63 | E1   | <i>Angelica</i>     | <i>archangelica</i>   | 1        | 2     | 25           | 0.448                     | 0.0602                      | 0.494                   | 10.6                   |         |
| Rxn #63 | F1   | <i>Angelica</i>     | <i>archangelica</i>   | 1        | 2     | 10           | 0.503                     | 0.0602                      | 0.494                   | -2.1                   |         |
| Rxn #63 | G1   | <i>Angelica</i>     | <i>archangelica</i>   | 1        | 2     | 1            | 0.522                     | 0.0602                      | 0.494                   | -6.5                   |         |
| Rxn #63 | H1   | <i>Angelica</i>     | <i>archangelica</i>   | 1        | 2     | 0.1          | 0.539                     | 0.0602                      | 0.494                   | -10.4                  |         |
| Rxn #63 | A2   | <i>Angelica</i>     | <i>archangelica</i>   | 1        | 2     | 200          | 0.384                     | 0.0602                      | 0.494                   | 25.4                   | 521.10  |
| Rxn #63 | B2   | <i>Angelica</i>     | <i>archangelica</i>   | 1        | 2     | 100          | 0.429                     | 0.0602                      | 0.494                   | 15.0                   |         |
| Rxn #63 | C2   | <i>Angelica</i>     | <i>archangelica</i>   | 1        | 2     | 75           | 0.441                     | 0.0602                      | 0.494                   | 12.2                   |         |
| Rxn #63 | D2   | <i>Angelica</i>     | <i>archangelica</i>   | 1        | 2     | 50           | 0.467                     | 0.0602                      | 0.494                   | 6.2                    |         |
| Rxn #63 | E2   | <i>Angelica</i>     | <i>archangelica</i>   | 1        | 2     | 25           | 0.477                     | 0.0602                      | 0.494                   | 3.9                    |         |
| Rxn #63 | F2   | <i>Angelica</i>     | <i>archangelica</i>   | 1        | 2     | 10           | 0.487                     | 0.0602                      | 0.494                   | 1.6                    |         |
| Rxn #63 | G2   | <i>Angelica</i>     | <i>archangelica</i>   | 1        | 2     | 1            | 0.509                     | 0.0602                      | 0.494                   | -3.5                   |         |
| Rxn #63 | H2   | <i>Angelica</i>     | <i>archangelica</i>   | 1        | 2     | 0.1          | 0.535                     | 0.0602                      | 0.494                   | -9.5                   |         |
| Rxn #63 | A3   | <i>Angelica</i>     | <i>archangelica</i>   | 1        | 2     | 200          | 0.377                     | 0.0602                      | 0.494                   | 27.0                   | 484.70  |
| Rxn #63 | B3   | <i>Angelica</i>     | <i>archangelica</i>   | 1        | 2     | 100          | 0.420                     | 0.0602                      | 0.494                   | 17.1                   |         |
| Rxn #63 | C3   | <i>Angelica</i>     | <i>archangelica</i>   | 1        | 2     | 75           | 0.436                     | 0.0602                      | 0.494                   | 13.4                   |         |
| Rxn #63 | D3   | <i>Angelica</i>     | <i>archangelica</i>   | 1        | 2     | 50           | 0.463                     | 0.0602                      | 0.494                   | 7.1                    |         |
| Rxn #63 | E3   | <i>Angelica</i>     | <i>archangelica</i>   | 1        | 2     | 25           | 0.474                     | 0.0602                      | 0.494                   | 4.6                    |         |
| Rxn #63 | F3   | <i>Angelica</i>     | <i>archangelica</i>   | 1        | 2     | 10           | 0.486                     | 0.0602                      | 0.494                   | 1.8                    |         |
| Rxn #63 | G3   | <i>Angelica</i>     | <i>archangelica</i>   | 1        | 2     | 1            | 0.508                     | 0.0602                      | 0.494                   | -3.2                   |         |
| Rxn #63 | H3   | <i>Angelica</i>     | <i>archangelica</i>   | 1        | 2     | 0.1          | 0.527                     | 0.0602                      | 0.494                   | -7.6                   |         |

**S5 Table. Data from Titrations of Top Botanical Candidates for Inhibition of KHKC Activity.**

| Rxn     |      | Botanical Extract   |                       |          |       |              | Sample                  | Ave. No Fructose Controls | Ave. Fructose Only Controls | KHKC           | *KHKC IC <sub>50</sub> |
|---------|------|---------------------|-----------------------|----------|-------|--------------|-------------------------|---------------------------|-----------------------------|----------------|------------------------|
| ID      | Well | Genus               | Species               | SampleID | Lot # | Conc (µg/mL) | ( OD <sub>340nm</sub> ) | ( OD <sub>340nm</sub> )   | ( OD <sub>340nm</sub> )     | Inhibition (%) | (µg/mL)                |
| Rxn #63 | A4   | <i>Scutellaria</i>  | <i>baicalensis</i>    | 2        | 2     | 200          | 0.128                   | 0.0602                    | 0.494                       | 84.4           | 22.83                  |
| Rxn #63 | B4   | <i>Scutellaria</i>  | <i>baicalensis</i>    | 2        | 2     | 100          | 0.180                   | 0.0602                    | 0.494                       | 72.4           |                        |
| Rxn #63 | C4   | <i>Scutellaria</i>  | <i>baicalensis</i>    | 2        | 2     | 75           | 0.203                   | 0.0602                    | 0.494                       | 67.1           |                        |
| Rxn #63 | D4   | <i>Scutellaria</i>  | <i>baicalensis</i>    | 2        | 2     | 50           | 0.233                   | 0.0602                    | 0.494                       | 60.2           |                        |
| Rxn #63 | E4   | <i>Scutellaria</i>  | <i>baicalensis</i>    | 2        | 2     | 25           | 0.256                   | 0.0602                    | 0.494                       | 54.9           |                        |
| Rxn #63 | F4   | <i>Scutellaria</i>  | <i>baicalensis</i>    | 2        | 2     | 10           | 0.352                   | 0.0602                    | 0.494                       | 32.7           |                        |
| Rxn #63 | G4   | <i>Scutellaria</i>  | <i>baicalensis</i>    | 2        | 2     | 1            | 0.483                   | 0.0602                    | 0.494                       | 2.5            |                        |
| Rxn #63 | H4   | <i>Scutellaria</i>  | <i>baicalensis</i>    | 2        | 2     | 0.1          | 0.511                   | 0.0602                    | 0.494                       | -3.9           |                        |
| Rxn #63 | A5   | <i>Scutellaria</i>  | <i>baicalensis</i>    | 2        | 2     | 200          | 0.151                   | 0.0602                    | 0.494                       | 79.1           | 22.21                  |
| Rxn #63 | B5   | <i>Scutellaria</i>  | <i>baicalensis</i>    | 2        | 2     | 100          | 0.179                   | 0.0602                    | 0.494                       | 72.6           |                        |
| Rxn #63 | C5   | <i>Scutellaria</i>  | <i>baicalensis</i>    | 2        | 2     | 75           | 0.206                   | 0.0602                    | 0.494                       | 66.4           |                        |
| Rxn #63 | D5   | <i>Scutellaria</i>  | <i>baicalensis</i>    | 2        | 2     | 50           | 0.219                   | 0.0602                    | 0.494                       | 63.4           |                        |
| Rxn #63 | E5   | <i>Scutellaria</i>  | <i>baicalensis</i>    | 2        | 2     | 25           | 0.273                   | 0.0602                    | 0.494                       | 50.9           |                        |
| Rxn #63 | F5   | <i>Scutellaria</i>  | <i>baicalensis</i>    | 2        | 2     | 10           | 0.347                   | 0.0602                    | 0.494                       | 33.9           |                        |
| Rxn #63 | G5   | <i>Scutellaria</i>  | <i>baicalensis</i>    | 2        | 2     | 1            | 0.481                   | 0.0602                    | 0.494                       | 3.0            |                        |
| Rxn #63 | H5   | <i>Scutellaria</i>  | <i>baicalensis</i>    | 2        | 2     | 0.1          | 0.513                   | 0.0602                    | 0.494                       | -4.4           |                        |
| Rxn #63 | A6   | <i>Scutellaria</i>  | <i>baicalensis</i>    | 2        | 2     | 200          | 0.130                   | 0.0602                    | 0.494                       | 83.9           | 25.04                  |
| Rxn #63 | B6   | <i>Scutellaria</i>  | <i>baicalensis</i>    | 2        | 2     | 100          | 0.179                   | 0.0602                    | 0.494                       | 72.6           |                        |
| Rxn #63 | C6   | <i>Scutellaria</i>  | <i>baicalensis</i>    | 2        | 2     | 75           | 0.202                   | 0.0602                    | 0.494                       | 67.3           |                        |
| Rxn #63 | D6   | <i>Scutellaria</i>  | <i>baicalensis</i>    | 2        | 2     | 50           | 0.233                   | 0.0602                    | 0.494                       | 60.2           |                        |
| Rxn #63 | E6   | <i>Scutellaria</i>  | <i>baicalensis</i>    | 2        | 2     | 25           | 0.263                   | 0.0602                    | 0.494                       | 53.3           |                        |
| Rxn #63 | F6   | <i>Scutellaria</i>  | <i>baicalensis</i>    | 2        | 2     | 10           | 0.372                   | 0.0602                    | 0.494                       | 28.1           |                        |
| Rxn #63 | G6   | <i>Scutellaria</i>  | <i>baicalensis</i>    | 2        | 2     | 1            | 0.496                   | 0.0602                    | 0.494                       | -0.5           |                        |
| Rxn #63 | H6   | <i>Scutellaria</i>  | <i>baicalensis</i>    | 2        | 2     | 0.1          | 0.510                   | 0.0602                    | 0.494                       | -3.7           |                        |
| Rxn #63 | A7   | <i>Petroselinum</i> | <i>crispum</i>        | 3        | 2     | 200          | 0.307                   | 0.0602                    | 0.494                       | 43.1           | 272.00                 |
| Rxn #63 | B7   | <i>Petroselinum</i> | <i>crispum</i>        | 3        | 2     | 100          | 0.381                   | 0.0602                    | 0.494                       | 26.0           |                        |
| Rxn #63 | C7   | <i>Petroselinum</i> | <i>crispum</i>        | 3        | 2     | 75           | 0.405                   | 0.0602                    | 0.494                       | 20.5           |                        |
| Rxn #63 | D7   | <i>Petroselinum</i> | <i>crispum</i>        | 3        | 2     | 50           | 0.437                   | 0.0602                    | 0.494                       | 13.1           |                        |
| Rxn #63 | E7   | <i>Petroselinum</i> | <i>crispum</i>        | 3        | 2     | 25           | 0.466                   | 0.0602                    | 0.494                       | 6.5            |                        |
| Rxn #63 | F7   | <i>Petroselinum</i> | <i>crispum</i>        | 3        | 2     | 10           | 0.484                   | 0.0602                    | 0.494                       | 2.3            |                        |
| Rxn #63 | G7   | <i>Petroselinum</i> | <i>crispum</i>        | 3        | 2     | 1            | 0.502                   | 0.0602                    | 0.494                       | -1.8           |                        |
| Rxn #63 | H7   | <i>Petroselinum</i> | <i>crispum</i>        | 3        | 2     | 0.1          | 0.511                   | 0.0602                    | 0.494                       | -3.9           |                        |
| Rxn #63 | A8   | <i>Petroselinum</i> | <i>crispum</i>        | 3        | 2     | 200          | 0.320                   | 0.0602                    | 0.494                       | 40.1           | 305.30                 |
| Rxn #63 | B8   | <i>Petroselinum</i> | <i>crispum</i>        | 3        | 2     | 100          | 0.392                   | 0.0602                    | 0.494                       | 23.5           |                        |
| Rxn #63 | C8   | <i>Petroselinum</i> | <i>crispum</i>        | 3        | 2     | 75           | 0.425                   | 0.0602                    | 0.494                       | 15.9           |                        |
| Rxn #63 | D8   | <i>Petroselinum</i> | <i>crispum</i>        | 3        | 2     | 50           | 0.440                   | 0.0602                    | 0.494                       | 12.4           |                        |
| Rxn #63 | E8   | <i>Petroselinum</i> | <i>crispum</i>        | 3        | 2     | 25           | 0.473                   | 0.0602                    | 0.494                       | 4.8            |                        |
| Rxn #63 | F8   | <i>Petroselinum</i> | <i>crispum</i>        | 3        | 2     | 10           | 0.493                   | 0.0602                    | 0.494                       | 0.2            |                        |
| Rxn #63 | G8   | <i>Petroselinum</i> | <i>crispum</i>        | 3        | 2     | 1            | 0.511                   | 0.0602                    | 0.494                       | -3.9           |                        |
| Rxn #63 | H8   | <i>Petroselinum</i> | <i>crispum</i>        | 3        | 2     | 0.1          | 0.511                   | 0.0602                    | 0.494                       | -3.9           |                        |
| Rxn #63 | A9   | <i>Petroselinum</i> | <i>crispum</i>        | 3        | 2     | 200          | 0.304                   | 0.0602                    | 0.494                       | 43.8           | 285.20                 |
| Rxn #63 | B9   | <i>Petroselinum</i> | <i>crispum</i>        | 3        | 2     | 100          | 0.390                   | 0.0602                    | 0.494                       | 24.0           |                        |
| Rxn #63 | C9   | <i>Petroselinum</i> | <i>crispum</i>        | 3        | 2     | 75           | 0.404                   | 0.0602                    | 0.494                       | 20.7           |                        |
| Rxn #63 | D9   | <i>Petroselinum</i> | <i>crispum</i>        | 3        | 2     | 50           | 0.433                   | 0.0602                    | 0.494                       | 14.1           |                        |
| Rxn #63 | E9   | <i>Petroselinum</i> | <i>crispum</i>        | 3        | 2     | 25           | 0.464                   | 0.0602                    | 0.494                       | 6.9            |                        |
| Rxn #63 | F9   | <i>Petroselinum</i> | <i>crispum</i>        | 3        | 2     | 10           | 0.485                   | 0.0602                    | 0.494                       | 2.1            |                        |
| Rxn #63 | G9   | <i>Petroselinum</i> | <i>crispum</i>        | 3        | 2     | 1            | 0.497                   | 0.0602                    | 0.494                       | -0.7           |                        |
| Rxn #63 | H9   | <i>Petroselinum</i> | <i>crispum</i>        | 3        | 2     | 0.1          | 0.497                   | 0.0602                    | 0.494                       | -0.7           |                        |
| Rxn #63 | A10  |                     | No Fructose Control   |          |       |              | 0.061                   | 0.0602                    | 0.494                       | 99.8           |                        |
| Rxn #63 | B10  |                     | No Fructose Control   |          |       |              | 0.067                   | 0.0602                    | 0.494                       | 98.4           |                        |
| Rxn #63 | C10  |                     | No Fructose Control   |          |       |              | 0.062                   | 0.0602                    | 0.494                       | 99.6           |                        |
| Rxn #63 | D10  |                     | No Fructose Control   |          |       |              | 0.054                   | 0.0602                    | 0.494                       | 101.4          |                        |
| Rxn #63 | E10  |                     | No Fructose Control   |          |       |              | 0.055                   | 0.0602                    | 0.494                       | 101.2          |                        |
| Rxn #63 | F10  |                     | No Fructose Control   |          |       |              | 0.061                   | 0.0602                    | 0.494                       | 99.8           |                        |
| Rxn #63 | G10  |                     | No Fructose Control   |          |       |              | 0.061                   | 0.0602                    | 0.494                       | 99.8           |                        |
| Rxn #63 | H10  |                     | No Fructose Control   |          |       |              | 0.061                   | 0.0602                    | 0.494                       | 99.8           |                        |
| Rxn #63 | A11  |                     | Fructose Only Control |          |       |              | 0.476                   | 0.0602                    | 0.494                       | 4.1            |                        |
| Rxn #63 | B11  |                     | Fructose Only Control |          |       |              | 0.495                   | 0.0602                    | 0.494                       | -0.2           |                        |
| Rxn #63 | C11  |                     | Fructose Only Control |          |       |              | 0.504                   | 0.0602                    | 0.494                       | -2.3           |                        |
| Rxn #63 | D11  |                     | Fructose Only Control |          |       |              | 0.491                   | 0.0602                    | 0.494                       | 0.7            |                        |
| Rxn #63 | E11  |                     | Fructose Only Control |          |       |              | 0.477                   | 0.0602                    | 0.494                       | 3.9            |                        |
| Rxn #63 | F11  |                     | Fructose Only Control |          |       |              | 0.509                   | 0.0602                    | 0.494                       | -3.5           |                        |
| Rxn #63 | G11  |                     | Fructose Only Control |          |       |              | 0.504                   | 0.0602                    | 0.494                       | -2.3           |                        |
| Rxn #63 | H11  |                     | Fructose Only Control |          |       |              | 0.497                   | 0.0602                    | 0.494                       | -0.7           |                        |
| Rxn #64 | A1   | <i>Garcinia</i>     | <i>mangostana</i>     | 4        | 2     | 200          | 0.185                   | 0.0714                    | 0.389                       | 64.2           | 27.64                  |
| Rxn #64 | B1   | <i>Garcinia</i>     | <i>mangostana</i>     | 4        | 2     | 100          | 0.161                   | 0.0714                    | 0.389                       | 71.8           |                        |
| Rxn #64 | C1   | <i>Garcinia</i>     | <i>mangostana</i>     | 4        | 2     | 75           | 0.178                   | 0.0714                    | 0.389                       | 66.4           |                        |
| Rxn #64 | D1   | <i>Garcinia</i>     | <i>mangostana</i>     | 4        | 2     | 50           | 0.227                   | 0.0714                    | 0.389                       | 51.0           |                        |
| Rxn #64 | E1   | <i>Garcinia</i>     | <i>mangostana</i>     | 4        | 2     | 25           | 0.272                   | 0.0714                    | 0.389                       | 36.8           |                        |
| Rxn #64 | F1   | <i>Garcinia</i>     | <i>mangostana</i>     | 4        | 2     | 10           | 0.404                   | 0.0714                    | 0.389                       | -4.7           |                        |
| Rxn #64 | G1   | <i>Garcinia</i>     | <i>mangostana</i>     | 4        | 2     | 1            | 0.502                   | 0.0714                    | 0.389                       | -35.6          |                        |
| Rxn #64 | H1   | <i>Garcinia</i>     | <i>mangostana</i>     | 4        | 2     | 0.1          | 0.540                   | 0.0714                    | 0.389                       | -47.5          |                        |
| Rxn #64 | A2   | <i>Garcinia</i>     | <i>mangostana</i>     | 4        | 2     | 200          | 0.173                   | 0.0714                    | 0.389                       | 68.0           | 25.39                  |
| Rxn #64 | B2   | <i>Garcinia</i>     | <i>mangostana</i>     | 4        | 2     | 100          | 0.170                   | 0.0714                    | 0.389                       | 69.0           |                        |
| Rxn #64 | C2   | <i>Garcinia</i>     | <i>mangostana</i>     | 4        | 2     | 75           | 0.167                   | 0.0714                    | 0.389                       | 69.9           |                        |
| Rxn #64 | D2   | <i>Garcinia</i>     | <i>mangostana</i>     | 4        | 2     | 50           | 0.198                   | 0.0714                    | 0.389                       | 60.1           |                        |
| Rxn #64 | E2   | <i>Garcinia</i>     | <i>mangostana</i>     | 4        | 2     | 25           | 0.271                   | 0.0714                    | 0.389                       | 37.2           |                        |
| Rxn #64 | F2   | <i>Garcinia</i>     | <i>mangostana</i>     | 4        | 2     | 10           | 0.391                   | 0.0714                    | 0.389                       | -0.6           |                        |
| Rxn #64 | G2   | <i>Garcinia</i>     | <i>mangostana</i>     | 4        | 2     | 1            | 0.500                   | 0.0714                    | 0.389                       | -34.9          |                        |
| Rxn #64 | H2   | <i>Garcinia</i>     | <i>mangostana</i>     | 4        | 2     | 0.1          | 0.526                   | 0.0714                    | 0.389                       | -43.1          |                        |
| Rxn #64 | A3   | <i>Garcinia</i>     | <i>mangostana</i>     | 4        | 2     | 200          | 0.177                   | 0.0714                    | 0.389                       | 66.8           | 29.53                  |
| Rxn #64 | B3   | <i>Garcinia</i>     | <i>mangostana</i>     | 4        | 2     | 100          | 0.170                   | 0.0714                    | 0.389                       | 69.0           |                        |
| Rxn #64 | C3   | <i>Garcinia</i>     | <i>mangostana</i>     | 4        | 2     | 75           | 0.194                   | 0.0714                    | 0.389                       | 61.4           |                        |
| Rxn #64 | D3   | <i>Garcinia</i>     | <i>mangostana</i>     | 4        | 2     | 50           | 0.225                   | 0.0714                    | 0.389                       | 51.6           |                        |

**S5 Table. Data from Titrations of Top Botanical Candidates for Inhibition of KHKC Activity.**

| Rxn     |      | Botanical Extract |                       |          |       | Sample       | Ave. No Fructose Controls | Ave. Fructose Only Controls | KHKC           | *KHKC IC <sub>50</sub> |
|---------|------|-------------------|-----------------------|----------|-------|--------------|---------------------------|-----------------------------|----------------|------------------------|
| ID      | Well | Genus             | Species               | SampleID | Lot # | Conc (µg/mL) | ( OD <sub>340nm</sub> )   | ( OD <sub>340nm</sub> )     | Inhibition (%) | (µg/mL)                |
| Rxn #64 | E3   | <i>Garcinia</i>   | <i>mangostana</i>     | 4        | 2     | 25           | 0.281                     | 0.0714                      | 0.389          | 34.0                   |
| Rxn #64 | F3   | <i>Garcinia</i>   | <i>mangostana</i>     | 4        | 2     | 10           | 0.405                     | 0.0714                      | 0.389          | -5.0                   |
| Rxn #64 | G3   | <i>Garcinia</i>   | <i>mangostana</i>     | 4        | 2     | 1            | 0.514                     | 0.0714                      | 0.389          | -39.4                  |
| Rxn #64 | H3   | <i>Garcinia</i>   | <i>mangostana</i>     | 4        | 2     | 0.1          | 0.537                     | 0.0714                      | 0.389          | -46.6                  |
| Rxn #64 | A10  |                   | No Fructose Control   |          |       |              | 0.274                     | 0.0714                      | 0.389          | 36.2                   |
| Rxn #64 | B10  |                   | No Fructose Control   |          |       |              | 0.363                     | 0.0714                      | 0.389          | 8.2                    |
| Rxn #64 | C10  |                   | No Fructose Control   |          |       |              | 0.415                     | 0.0714                      | 0.389          | -8.2                   |
| Rxn #64 | D10  |                   | No Fructose Control   |          |       |              | 0.440                     | 0.0714                      | 0.389          | -16.1                  |
| Rxn #64 | E10  |                   | No Fructose Control   |          |       |              | 0.423                     | 0.0714                      | 0.389          | -10.7                  |
| Rxn #64 | F10  |                   | No Fructose Control   |          |       |              | 0.417                     | 0.0714                      | 0.389          | -8.8                   |
| Rxn #64 | G10  |                   | No Fructose Control   |          |       |              | 0.415                     | 0.0714                      | 0.389          | -8.2                   |
| Rxn #64 | H10  |                   | No Fructose Control   |          |       |              | 0.368                     | 0.0714                      | 0.389          | 6.6                    |
| Rxn #64 | A11  |                   | Fructose Only Control |          |       |              | 0.082                     | 0.0714                      | 0.389          | 96.7                   |
| Rxn #64 | B11  |                   | Fructose Only Control |          |       |              | 0.076                     | 0.0714                      | 0.389          | 98.6                   |
| Rxn #64 | C11  |                   | Fructose Only Control |          |       |              | 0.071                     | 0.0714                      | 0.389          | 100.1                  |
| Rxn #64 | D11  |                   | Fructose Only Control |          |       |              | 0.070                     | 0.0714                      | 0.389          | 100.4                  |
| Rxn #64 | E11  |                   | Fructose Only Control |          |       |              | 0.070                     | 0.0714                      | 0.389          | 100.4                  |
| Rxn #64 | F11  |                   | Fructose Only Control |          |       |              | 0.065                     | 0.0714                      | 0.389          | 102.0                  |
| Rxn #64 | G11  |                   | Fructose Only Control |          |       |              | 0.064                     | 0.0714                      | 0.389          | 102.3                  |
| Rxn #64 | H11  |                   | Fructose Only Control |          |       |              | 0.073                     | 0.0714                      | 0.389          | 99.5                   |

IC<sub>50</sub>: half maximal inhibitory concentration. OD: optical density.

\*KHKC IC<sub>50</sub>s were calculated using nonlinear regression (three parameters) in GraphPad Prism 5.03. To generate a best fit, an upper concentration (10,000 µg/mL at 100% inhibition) and a lower concentration (0.001 µg/mL at 0% inhibition) were added.
