# Supplementary material for: Bioactivity-Guided Identification of Botanical Inhibitors of Ketohexokinase
Source: PubMed Central journal article supplement (PMC4913896; doi:10.1371/journal.pone.0157458), 2016-06-20
Supplement: pone.0157458.s006.pdf [file pone.0157458.s006.pdf]

**S6 Table. Data from Titrations of Top Botanical Candidates for Inhibition of Fructose-Induced ATP Depletion.**

| Rxn     |      | Botanical Extract |                       |          |       | Sample       | Ave. No Fructose Controls | Ave. Fructose Only Controls | ATP Depletion | *ATP Depletion IC <sub>50</sub> |
|---------|------|-------------------|-----------------------|----------|-------|--------------|---------------------------|-----------------------------|---------------|---------------------------------|
| ID      | Well | Genus             | Species               | SampleID | Lot # | Conc (µg/mL) | ( OD <sub>570nm</sub> )   | ( OD <sub>570nm</sub> )     | (%)           | (µg/mL)                         |
| ATP #12 | A1   |                   | No Fructose Control   |          |       |              | 0.147                     | 0.139                       | 1.068         |                                 |
| ATP #12 | B1   |                   | No Fructose Control   |          |       |              | 0.133                     | 0.139                       | 1.068         |                                 |
| ATP #12 | C1   |                   | No Fructose Control   |          |       |              | 0.065                     | 0.139                       | 1.068         |                                 |
| ATP #12 | D1   |                   | No Fructose Control   |          |       |              | 0.142                     | 0.139                       | 1.068         |                                 |
| ATP #12 | E1   |                   | No Fructose Control   |          |       |              | 0.221                     | 0.139                       | 1.068         |                                 |
| ATP #12 | F1   |                   | No Fructose Control   |          |       |              | 0.134                     | 0.139                       | 1.068         |                                 |
| ATP #12 | G1   |                   | No Fructose Control   |          |       |              | 0.163                     | 0.139                       | 1.068         |                                 |
| ATP #12 | H1   |                   | No Fructose Control   |          |       |              | 0.114                     | 0.139                       | 1.068         |                                 |
| ATP #12 | A2   |                   | Fructose Only Control |          |       |              | 1.093                     | 0.139                       | 1.068         |                                 |
| ATP #12 | B2   |                   | Fructose Only Control |          |       |              | 1.055                     | 0.139                       | 1.068         |                                 |
| ATP #12 | C2   |                   | Fructose Only Control |          |       |              | 0.981                     | 0.139                       | 1.068         |                                 |
| ATP #12 | D2   |                   | Fructose Only Control |          |       |              | 1.063                     | 0.139                       | 1.068         |                                 |
| ATP #12 | E2   |                   | Fructose Only Control |          |       |              | 1.162                     | 0.139                       | 1.068         |                                 |
| ATP #12 | F2   |                   | Fructose Only Control |          |       |              | 1.061                     | 0.139                       | 1.068         |                                 |
| ATP #12 | G2   |                   | Fructose Only Control |          |       |              | 1.062                     | 0.139                       | 1.068         |                                 |
| ATP #12 | H2   |                   | Fructose Only Control |          |       |              | 0.927                     | 0.139                       | 1.068         |                                 |
| ATP #12 | A3   | Angelica          | archangelica          | 1        | 1     | 500          | -0.234                    | 0.139                       | 1.068         | 60.17                           |
| ATP #12 | B3   | Angelica          | archangelica          | 1        | 1     | 250          | -0.182                    | 0.139                       | 1.068         | 134.6                           |
| ATP #12 | C3   | Angelica          | archangelica          | 1        | 1     | 125          | 0.434                     | 0.139                       | 1.068         | 68.2                            |
| ATP #12 | D3   | Angelica          | archangelica          | 1        | 1     | 50           | 0.357                     | 0.139                       | 1.068         | 76.5                            |
| ATP #12 | E3   | Angelica          | archangelica          | 1        | 1     | 25           | 1.044                     | 0.139                       | 1.068         | 2.6                             |
| ATP #12 | F3   | Angelica          | archangelica          | 1        | 1     | 10           | 1.189                     | 0.139                       | 1.068         | -13.0                           |
| ATP #12 | G3   | Angelica          | archangelica          | 1        | 1     | 1            | 1.118                     | 0.139                       | 1.068         | -5.4                            |
| ATP #12 | H3   | Angelica          | archangelica          | 1        | 1     | 0.1          | 1.096                     | 0.139                       | 1.068         | -3.0                            |
| ATP #12 | A4   | Angelica          | archangelica          | 1        | 1     | 500          | 0.06                      | 0.139                       | 1.068         | 108.5                           |
| ATP #12 | B4   | Angelica          | archangelica          | 1        | 1     | 250          | 0.071                     | 0.139                       | 1.068         | 107.3                           |
| ATP #12 | C4   | Angelica          | archangelica          | 1        | 1     | 125          | 0.437                     | 0.139                       | 1.068         | 67.9                            |
| ATP #12 | D4   | Angelica          | archangelica          | 1        | 1     | 50           | 0.605                     | 0.139                       | 1.068         | 49.8                            |
| ATP #12 | E4   | Angelica          | archangelica          | 1        | 1     | 25           | 1.096                     | 0.139                       | 1.068         | -3.0                            |
| ATP #12 | F4   | Angelica          | archangelica          | 1        | 1     | 10           | 1.219                     | 0.139                       | 1.068         | -16.3                           |
| ATP #12 | G4   | Angelica          | archangelica          | 1        | 1     | 1            | 1.172                     | 0.139                       | 1.068         | -11.2                           |
| ATP #12 | H4   | Angelica          | archangelica          | 1        | 1     | 0.1          | 0.801                     | 0.139                       | 1.068         | 28.7                            |
| ATP #12 | A5   | Angelica          | archangelica          | 1        | 1     | 500          | -0.129                    | 0.139                       | 1.068         | 128.8                           |
| ATP #12 | B5   | Angelica          | archangelica          | 1        | 1     | 250          | -0.009                    | 0.139                       | 1.068         | 115.9                           |
| ATP #12 | C5   | Angelica          | archangelica          | 1        | 1     | 125          | 0.409                     | 0.139                       | 1.068         | 70.9                            |
| ATP #12 | D5   | Angelica          | archangelica          | 1        | 1     | 50           | 0.725                     | 0.139                       | 1.068         | 36.9                            |
| ATP #12 | E5   | Angelica          | archangelica          | 1        | 1     | 25           | 0.953                     | 0.139                       | 1.068         | 12.4                            |
| ATP #12 | F5   | Angelica          | archangelica          | 1        | 1     | 10           | 1.041                     | 0.139                       | 1.068         | 2.9                             |
| ATP #12 | G5   | Angelica          | archangelica          | 1        | 1     | 1            | 1.112                     | 0.139                       | 1.068         | -4.7                            |
| ATP #12 | H5   | Angelica          | archangelica          | 1        | 1     | 0.1          | 1.049                     | 0.139                       | 1.068         | 2.0                             |
| ATP #13 | A1   |                   | No Fructose Control   |          |       |              | -0.694                    | -0.653                      | 0.561         | 103.4                           |
| ATP #13 | B1   |                   | No Fructose Control   |          |       |              | -0.68                     | -0.653                      | 0.561         | 102.2                           |
| ATP #13 | C1   |                   | No Fructose Control   |          |       |              | -0.719                    | -0.653                      | 0.561         | 105.4                           |
| ATP #13 | D1   |                   | No Fructose Control   |          |       |              | -0.74                     | -0.653                      | 0.561         | 107.2                           |
| ATP #13 | E1   |                   | No Fructose Control   |          |       |              | -0.593                    | -0.653                      | 0.561         | 95.1                            |
| ATP #13 | F1   |                   | No Fructose Control   |          |       |              | -0.609                    | -0.653                      | 0.561         | 96.4                            |
| ATP #13 | G1   |                   | No Fructose Control   |          |       |              | -0.582                    | -0.653                      | 0.561         | 94.2                            |
| ATP #13 | H1   |                   | No Fructose Control   |          |       |              | -0.607                    | -0.653                      | 0.561         | 96.2                            |
| ATP #13 | A2   |                   | Fructose Only Control |          |       |              | 0.524                     | -0.653                      | 0.561         | 3.0                             |
| ATP #13 | B2   |                   | Fructose Only Control |          |       |              | 0.593                     | -0.653                      | 0.561         | -2.6                            |
| ATP #13 | C2   |                   | Fructose Only Control |          |       |              | 0.528                     | -0.653                      | 0.561         | 2.7                             |
| ATP #13 | D2   |                   | Fructose Only Control |          |       |              | 0.54                      | -0.653                      | 0.561         | 1.7                             |
| ATP #13 | E2   |                   | Fructose Only Control |          |       |              | 0.614                     | -0.653                      | 0.561         | -4.4                            |
| ATP #13 | F2   |                   | Fructose Only Control |          |       |              | 0.609                     | -0.653                      | 0.561         | -4.0                            |
| ATP #13 | G2   |                   | Fructose Only Control |          |       |              | 0.516                     | -0.653                      | 0.561         | 3.7                             |
| ATP #13 | H2   |                   | Fructose Only Control |          |       |              | 0.728                     | -0.653                      | 0.561         | -13.8                           |
| ATP #13 | A3   | Scutellaria       | baicalensis           | 4        | 1     | 500          | -0.469                    | -0.653                      | 0.561         | 84.8                            |
| ATP #13 | B3   | Scutellaria       | baicalensis           | 4        | 1     | 250          | -0.553                    | -0.653                      | 0.561         | 91.8                            |
| ATP #13 | C3   | Scutellaria       | baicalensis           | 4        | 1     | 125          | -0.109                    | -0.653                      | 0.561         | 55.2                            |
| ATP #13 | D3   | Scutellaria       | baicalensis           | 4        | 1     | 50           | -0.091                    | -0.653                      | 0.561         | 53.7                            |
| ATP #13 | E3   | Scutellaria       | baicalensis           | 4        | 1     | 25           | 0.281                     | -0.653                      | 0.561         | 23.1                            |
| ATP #13 | F3   | Scutellaria       | baicalensis           | 4        | 1     | 10           | 0.379                     | -0.653                      | 0.561         | 15.0                            |
| ATP #13 | G3   | Scutellaria       | baicalensis           | 4        | 1     | 1            | 0.512                     | -0.653                      | 0.561         | 4.0                             |
| ATP #13 | H3   | Scutellaria       | baicalensis           | 4        | 1     | 0.1          | 0.502                     | -0.653                      | 0.561         | 4.9                             |
| ATP #13 | A4   | Scutellaria       | baicalensis           | 4        | 1     | 500          | -0.536                    | -0.653                      | 0.561         | 90.4                            |
| ATP #13 | B4   | Scutellaria       | baicalensis           | 4        | 1     | 250          | -0.504                    | -0.653                      | 0.561         | 87.7                            |
| ATP #13 | C4   | Scutellaria       | baicalensis           | 4        | 1     | 125          | -0.085                    | -0.653                      | 0.561         | 53.2                            |
| ATP #13 | D4   | Scutellaria       | baicalensis           | 4        | 1     | 50           | -0.08                     | -0.653                      | 0.561         | 52.8                            |
| ATP #13 | E4   | Scutellaria       | baicalensis           | 4        | 1     | 25           | 0.298                     | -0.653                      | 0.561         | 21.7                            |
| ATP #13 | F4   | Scutellaria       | baicalensis           | 4        | 1     | 10           | 0.447                     | -0.653                      | 0.561         | 9.4                             |
| ATP #13 | G4   | Scutellaria       | baicalensis           | 4        | 1     | 1            | 0.491                     | -0.653                      | 0.561         | 5.8                             |
| ATP #13 | H4   | Scutellaria       | baicalensis           | 4        | 1     | 0.1          | 0.532                     | -0.653                      | 0.561         | 2.4                             |
| ATP #13 | A5   | Scutellaria       | baicalensis           | 4        | 1     | 500          | -0.534                    | -0.653                      | 0.561         | 90.2                            |
| ATP #13 | B5   | Scutellaria       | baicalensis           | 4        | 1     | 250          | -0.582                    | -0.653                      | 0.561         | 94.2                            |
| ATP #13 | C5   | Scutellaria       | baicalensis           | 4        | 1     | 125          | -0.156                    | -0.653                      | 0.561         | 59.1                            |
| ATP #13 | D5   | Scutellaria       | baicalensis           | 4        | 1     | 50           | 0.107                     | -0.653                      | 0.561         | 37.4                            |
| ATP #13 | E5   | Scutellaria       | baicalensis           | 4        | 1     | 25           | 0.258                     | -0.653                      | 0.561         | 25.0                            |
| ATP #13 | F5   | Scutellaria       | baicalensis           | 4        | 1     | 10           | 0.383                     | -0.653                      | 0.561         | 14.7                            |
| ATP #13 | G5   | Scutellaria       | baicalensis           | 4        | 1     | 1            | 0.521                     | -0.653                      | 0.561         | 3.3                             |
| ATP #13 | H5   | Scutellaria       | baicalensis           | 4        | 1     | 0.1          | 0.527                     | -0.653                      | 0.561         | 2.8                             |
| ATP #13 | A6   | Petroselinum      | crispum               | 6        | 1     | 500          | -0.342                    | -0.653                      | 0.561         | 74.4                            |
| ATP #13 | B6   | Petroselinum      | crispum               | 6        | 1     | 250          | -0.516                    | -0.653                      | 0.561         | 88.7                            |
| ATP #13 | C6   | Petroselinum      | crispum               | 6        | 1     | 125          | 0.205                     | -0.653                      | 0.561         | 29.3                            |
| ATP #13 | D6   | Petroselinum      | crispum               | 6        | 1     | 50           | 0.199                     | -0.653                      | 0.561         | 29.8                            |
| ATP #13 | E6   | Petroselinum      | crispum               | 6        | 1     | 25           | 0.398                     | -0.653                      | 0.561         | 13.4                            |
| ATP #13 | F6   | Petroselinum      | crispum               | 6        | 1     | 10           | 0.361                     | -0.653                      | 0.561         | 16.5                            |
| ATP #13 | G6   | Petroselinum      | crispum               | 6        | 1     | 1            | 0.604                     | -0.653                      | 0.561         | -3.5                            |
| ATP #13 | H6   | Petroselinum      | crispum               | 6        | 1     | 0.1          | 0.643                     | -0.653                      | 0.561         | -6.8                            |
| ATP #13 | A7   | Petroselinum      | crispum               | 6        | 1     | 500          | -0.296                    | -0.653                      | 0.561         | 70.6                            |
| ATP #13 | B7   | Petroselinum      | crispum               | 6        | 1     | 250          | -0.326                    | -0.653                      | 0.561         | 73.1                            |
| ATP #13 | C7   | Petroselinum      | crispum               | 6        | 1     | 125          | 0.086                     | -0.653                      | 0.561         | 39.1                            |
| ATP #13 | D7   | Petroselinum      | crispum               | 6        | 1     | 50           | 0.172                     | -0.653                      | 0.561         | 32.0                            |
| ATP #13 | E7   | Petroselinum      | crispum               | 6        | 1     | 25           | 0.406                     | -0.653                      | 0.561         | 12.8                            |

**S6 Table. Data from Titrations of Top Botanical Candidates for Inhibition of Fructose-Induced ATP Depletion.**

| Rxn     |      | Botanical Extract   |                       |          |       | Sample       | Ave. No Fructose Controls | Ave. Fructose Only Controls | ATP Depletion | *ATP Depletion IC <sub>50</sub> |
|---------|------|---------------------|-----------------------|----------|-------|--------------|---------------------------|-----------------------------|---------------|---------------------------------|
| ID      | Well | Genus               | Species               | SampleID | Lot # | Conc (µg/mL) | ( OD <sub>570nm</sub> )   | ( OD <sub>570nm</sub> )     | (%)           | (µg/mL)                         |
| ATP #13 | F7   | <i>Petroselinum</i> | <i>crispum</i>        | 6        | 1     | 10           | 0.462                     | -0.653                      | 0.561         |                                 |
| ATP #13 | G7   | <i>Petroselinum</i> | <i>crispum</i>        | 6        | 1     | 1            | 0.136                     | -0.653                      | 0.561         | 35.0                            |
| ATP #13 | H7   | <i>Petroselinum</i> | <i>crispum</i>        | 6        | 1     | 0.1          | 0.285                     | -0.653                      | 0.561         | 22.7                            |
| ATP #13 | A8   | <i>Petroselinum</i> | <i>crispum</i>        | 6        | 1     | 500          | -0.24                     | -0.653                      | 0.561         | 66.0                            |
| ATP #13 | B8   | <i>Petroselinum</i> | <i>crispum</i>        | 6        | 1     | 250          | -0.334                    | -0.653                      | 0.561         | 73.7                            |
| ATP #13 | C8   | <i>Petroselinum</i> | <i>crispum</i>        | 6        | 1     | 125          | 0.135                     | -0.653                      | 0.561         | 35.1                            |
| ATP #13 | D8   | <i>Petroselinum</i> | <i>crispum</i>        | 6        | 1     | 50           | 0.294                     | -0.653                      | 0.561         | 22.0                            |
| ATP #13 | E8   | <i>Petroselinum</i> | <i>crispum</i>        | 6        | 1     | 25           | 0.407                     | -0.653                      | 0.561         | 12.7                            |
| ATP #13 | F8   | <i>Petroselinum</i> | <i>crispum</i>        | 6        | 1     | 10           | 0.544                     | -0.653                      | 0.561         | 1.4                             |
| ATP #13 | G8   | <i>Petroselinum</i> | <i>crispum</i>        | 6        | 1     | 1            | 1.023                     | -0.653                      | 0.561         | -38.1                           |
| ATP #13 | H8   | <i>Petroselinum</i> | <i>crispum</i>        | 6        | 1     | 0.1          | 1.004                     | -0.653                      | 0.561         | -36.5                           |
| ATP #13 | A9   | <i>Garcinia</i>     | <i>mangostana</i>     | 8        | 1     | 500          | -0.507                    | -0.653                      | 0.561         | 88.0                            |
| ATP #13 | B9   | <i>Garcinia</i>     | <i>mangostana</i>     | 8        | 1     | 250          | -0.328                    | -0.653                      | 0.561         | 73.2                            |
| ATP #13 | C9   | <i>Garcinia</i>     | <i>mangostana</i>     | 8        | 1     | 125          | -0.457                    | -0.653                      | 0.561         | 83.9                            |
| ATP #13 | D9   | <i>Garcinia</i>     | <i>mangostana</i>     | 8        | 1     | 50           | -0.443                    | -0.653                      | 0.561         | 82.7                            |
| ATP #13 | E9   | <i>Garcinia</i>     | <i>mangostana</i>     | 8        | 1     | 25           | 0.311                     | -0.653                      | 0.561         | 20.6                            |
| ATP #13 | F9   | <i>Garcinia</i>     | <i>mangostana</i>     | 8        | 1     | 10           | 0.463                     | -0.653                      | 0.561         | 8.1                             |
| ATP #13 | G9   | <i>Garcinia</i>     | <i>mangostana</i>     | 8        | 1     | 1            | 0.704                     | -0.653                      | 0.561         | -11.8                           |
| ATP #13 | H9   | <i>Garcinia</i>     | <i>mangostana</i>     | 8        | 1     | 0.1          | 0.898                     | -0.653                      | 0.561         | -27.8                           |
| ATP #13 | A10  | <i>Garcinia</i>     | <i>mangostana</i>     | 8        | 1     | 500          | -0.55                     | -0.653                      | 0.561         | 91.5                            |
| ATP #13 | B10  | <i>Garcinia</i>     | <i>mangostana</i>     | 8        | 1     | 250          | -0.382                    | -0.653                      | 0.561         | 77.7                            |
| ATP #13 | C10  | <i>Garcinia</i>     | <i>mangostana</i>     | 8        | 1     | 125          | -0.584                    | -0.653                      | 0.561         | 94.3                            |
| ATP #13 | D10  | <i>Garcinia</i>     | <i>mangostana</i>     | 8        | 1     | 50           | -0.411                    | -0.653                      | 0.561         | 80.1                            |
| ATP #13 | E10  | <i>Garcinia</i>     | <i>mangostana</i>     | 8        | 1     | 25           | 0.201                     | -0.653                      | 0.561         | 29.7                            |
| ATP #13 | F10  | <i>Garcinia</i>     | <i>mangostana</i>     | 8        | 1     | 10           | 0.474                     | -0.653                      | 0.561         | 7.2                             |
| ATP #13 | G10  | <i>Garcinia</i>     | <i>mangostana</i>     | 8        | 1     | 1            | 0.55                      | -0.653                      | 0.561         | 0.9                             |
| ATP #13 | H10  | <i>Garcinia</i>     | <i>mangostana</i>     | 8        | 1     | 0.1          | 0.499                     | -0.653                      | 0.561         | 5.1                             |
| ATP #13 | A11  | <i>Garcinia</i>     | <i>mangostana</i>     | 8        | 1     | 500          | -0.321                    | -0.653                      | 0.561         | 72.7                            |
| ATP #13 | B11  | <i>Garcinia</i>     | <i>mangostana</i>     | 8        | 1     | 250          | -0.507                    | -0.653                      | 0.561         | 88.0                            |
| ATP #13 | C11  | <i>Garcinia</i>     | <i>mangostana</i>     | 8        | 1     | 125          | -0.552                    | -0.653                      | 0.561         | 91.7                            |
| ATP #13 | D11  | <i>Garcinia</i>     | <i>mangostana</i>     | 8        | 1     | 50           | -0.307                    | -0.653                      | 0.561         | 71.5                            |
| ATP #13 | E11  | <i>Garcinia</i>     | <i>mangostana</i>     | 8        | 1     | 25           | 0.188                     | -0.653                      | 0.561         | 30.7                            |
| ATP #13 | F11  | <i>Garcinia</i>     | <i>mangostana</i>     | 8        | 1     | 10           | 0.449                     | -0.653                      | 0.561         | 9.2                             |
| ATP #13 | G11  | <i>Garcinia</i>     | <i>mangostana</i>     | 8        | 1     | 1            | 0.608                     | -0.653                      | 0.561         | -3.9                            |
| ATP #13 | H11  | <i>Garcinia</i>     | <i>mangostana</i>     | 8        | 1     | 0.1          | 0.562                     | -0.653                      | 0.561         | -0.1                            |
| ATP #21 | A1   |                     | No Fructose Control   |          |       |              | 0.189                     | 0.231                       | 1.39          | 103.6                           |
| ATP #21 | B1   |                     | No Fructose Control   |          |       |              | 0.166                     | 0.231                       | 1.39          | 105.6                           |
| ATP #21 | C1   |                     | No Fructose Control   |          |       |              | 0.178                     | 0.231                       | 1.39          | 104.6                           |
| ATP #21 | D1   |                     | No Fructose Control   |          |       |              | 0.179                     | 0.231                       | 1.39          | 104.5                           |
| ATP #21 | E1   |                     | No Fructose Control   |          |       |              | 0.285                     | 0.231                       | 1.39          | 95.3                            |
| ATP #21 | F1   |                     | No Fructose Control   |          |       |              | 0.327                     | 0.231                       | 1.39          | 91.7                            |
| ATP #21 | G1   |                     | No Fructose Control   |          |       |              | 0.243                     | 0.231                       | 1.39          | 99.0                            |
| ATP #21 | H1   |                     | No Fructose Control   |          |       |              | 0.279                     | 0.231                       | 1.39          | 95.9                            |
| ATP #21 | A2   |                     | Fructose Only Control |          |       |              | 1.354                     | 0.231                       | 1.39          | 3.1                             |
| ATP #21 | B2   |                     | Fructose Only Control |          |       |              | 1.375                     | 0.231                       | 1.39          | 1.3                             |
| ATP #21 | C2   |                     | Fructose Only Control |          |       |              | 1.420                     | 0.231                       | 1.39          | -2.6                            |
| ATP #21 | D2   |                     | Fructose Only Control |          |       |              | 1.380                     | 0.231                       | 1.39          | 0.9                             |
| ATP #21 | E2   |                     | Fructose Only Control |          |       |              | 1.457                     | 0.231                       | 1.39          | -5.8                            |
| ATP #21 | F2   |                     | Fructose Only Control |          |       |              | 1.406                     | 0.231                       | 1.39          | -1.4                            |
| ATP #21 | G2   |                     | Fructose Only Control |          |       |              | 1.368                     | 0.231                       | 1.39          | 1.9                             |
| ATP #21 | H2   |                     | Fructose Only Control |          |       |              | 1.359                     | 0.231                       | 1.39          | 2.7                             |
| ATP #21 | A3   | <i>Angelica</i>     | <i>archangelica</i>   | 1        | 2     | 500          | 0.880                     | 0.231                       | 1.39          | 44.0                            |
| ATP #21 | B3   | <i>Angelica</i>     | <i>archangelica</i>   | 1        | 2     | 250          | 1.066                     | 0.231                       | 1.39          | 28.0                            |
| ATP #21 | C3   | <i>Angelica</i>     | <i>archangelica</i>   | 1        | 2     | 125          | 1.258                     | 0.231                       | 1.39          | 11.4                            |
| ATP #21 | D3   | <i>Angelica</i>     | <i>archangelica</i>   | 1        | 2     | 50           | 1.313                     | 0.231                       | 1.39          | 6.6                             |
| ATP #21 | E3   | <i>Angelica</i>     | <i>archangelica</i>   | 1        | 2     | 25           | 1.343                     | 0.231                       | 1.39          | 4.1                             |
| ATP #21 | F3   | <i>Angelica</i>     | <i>archangelica</i>   | 1        | 2     | 10           | 1.377                     | 0.231                       | 1.39          | 1.1                             |
| ATP #21 | G3   | <i>Angelica</i>     | <i>archangelica</i>   | 1        | 2     | 1            | 1.359                     | 0.231                       | 1.39          | 2.7                             |
| ATP #21 | H3   | <i>Angelica</i>     | <i>archangelica</i>   | 1        | 2     | 0.1          | 1.369                     | 0.231                       | 1.39          | 1.8                             |
| ATP #21 | A4   | <i>Angelica</i>     | <i>archangelica</i>   | 1        | 2     | 500          | 0.816                     | 0.231                       | 1.39          | 49.5                            |
| ATP #21 | B4   | <i>Angelica</i>     | <i>archangelica</i>   | 1        | 2     | 250          | 1.124                     | 0.231                       | 1.39          | 23.0                            |
| ATP #21 | C4   | <i>Angelica</i>     | <i>archangelica</i>   | 1        | 2     | 125          | 1.272                     | 0.231                       | 1.39          | 10.2                            |
| ATP #21 | D4   | <i>Angelica</i>     | <i>archangelica</i>   | 1        | 2     | 50           | 1.311                     | 0.231                       | 1.39          | 6.8                             |
| ATP #21 | E4   | <i>Angelica</i>     | <i>archangelica</i>   | 1        | 2     | 25           | 1.407                     | 0.231                       | 1.39          | -1.5                            |
| ATP #21 | F4   | <i>Angelica</i>     | <i>archangelica</i>   | 1        | 2     | 10           | 1.421                     | 0.231                       | 1.39          | -2.7                            |
| ATP #21 | G4   | <i>Angelica</i>     | <i>archangelica</i>   | 1        | 2     | 1            | 1.381                     | 0.231                       | 1.39          | 0.8                             |
| ATP #21 | H4   | <i>Angelica</i>     | <i>archangelica</i>   | 1        | 2     | 0.1          | 1.883                     | 0.231                       | 1.39          | -42.5                           |
| ATP #21 | A5   | <i>Angelica</i>     | <i>archangelica</i>   | 1        | 2     | 500          | 0.929                     | 0.231                       | 1.39          | 39.8                            |
| ATP #21 | B5   | <i>Angelica</i>     | <i>archangelica</i>   | 1        | 2     | 250          | 1.204                     | 0.231                       | 1.39          | 16.0                            |
| ATP #21 | C5   | <i>Angelica</i>     | <i>archangelica</i>   | 1        | 2     | 125          | 1.145                     | 0.231                       | 1.39          | 21.1                            |
| ATP #21 | D5   | <i>Angelica</i>     | <i>archangelica</i>   | 1        | 2     | 50           | 1.243                     | 0.231                       | 1.39          | 12.7                            |
| ATP #21 | E5   | <i>Angelica</i>     | <i>archangelica</i>   | 1        | 2     | 25           | 1.284                     | 0.231                       | 1.39          | 9.1                             |
| ATP #21 | F5   | <i>Angelica</i>     | <i>archangelica</i>   | 1        | 2     | 10           | 1.296                     | 0.231                       | 1.39          | 8.1                             |
| ATP #21 | G5   | <i>Angelica</i>     | <i>archangelica</i>   | 1        | 2     | 1            | 1.481                     | 0.231                       | 1.39          | -7.9                            |
| ATP #21 | H5   | <i>Angelica</i>     | <i>archangelica</i>   | 1        | 2     | 0.1          | 1.292                     | 0.231                       | 1.39          | 8.5                             |
| ATP #21 | A6   | <i>Scutellaria</i>  | <i>baicalensis</i>    | 2        | 2     | 500          | 0.241                     | 0.231                       | 1.39          | 99.1                            |
| ATP #21 | B6   | <i>Scutellaria</i>  | <i>baicalensis</i>    | 2        | 2     | 250          | 0.211                     | 0.231                       | 1.39          | 101.7                           |
| ATP #21 | C6   | <i>Scutellaria</i>  | <i>baicalensis</i>    | 2        | 2     | 125          | 0.244                     | 0.231                       | 1.39          | 98.9                            |
| ATP #21 | D6   | <i>Scutellaria</i>  | <i>baicalensis</i>    | 2        | 2     | 50           | 0.530                     | 0.231                       | 1.39          | 74.2                            |
| ATP #21 | E6   | <i>Scutellaria</i>  | <i>baicalensis</i>    | 2        | 2     | 25           | 0.849                     | 0.231                       | 1.39          | 46.7                            |
| ATP #21 | F6   | <i>Scutellaria</i>  | <i>baicalensis</i>    | 2        | 2     | 10           | 1.133                     | 0.231                       | 1.39          | 22.2                            |
| ATP #21 | G6   | <i>Scutellaria</i>  | <i>baicalensis</i>    | 2        | 2     | 1            | 1.311                     | 0.231                       | 1.39          | 6.8                             |
| ATP #21 | H6   | <i>Scutellaria</i>  | <i>baicalensis</i>    | 2        | 2     | 0.1          | 1.414                     | 0.231                       | 1.39          | -2.1                            |
| ATP #21 | A7   | <i>Scutellaria</i>  | <i>baicalensis</i>    | 2        | 2     | 500          | 0.287                     | 0.231                       | 1.39          | 95.2                            |
| ATP #21 | B7   | <i>Scutellaria</i>  | <i>baicalensis</i>    | 2        | 2     | 250          | 0.259                     | 0.231                       | 1.39          | 97.6                            |
| ATP #21 | C7   | <i>Scutellaria</i>  | <i>baicalensis</i>    | 2        | 2     | 125          | 0.304                     | 0.231                       | 1.39          | 93.7                            |
| ATP #21 | D7   | <i>Scutellaria</i>  | <i>baicalensis</i>    | 2        | 2     | 50           | 0.567                     | 0.231                       | 1.39          | 71.0                            |
| ATP #21 | E7   | <i>Scutellaria</i>  | <i>baicalensis</i>    | 2        | 2     | 25           | 0.898                     | 0.231                       | 1.39          | 42.5                            |
| ATP #21 | F7   | <i>Scutellaria</i>  | <i>baicalensis</i>    | 2        | 2     | 10           | 1.130                     | 0.231                       | 1.39          | 22.4                            |
| ATP #21 | G7   | <i>Scutellaria</i>  | <i>baicalensis</i>    | 2        | 2     | 1            | 1.331                     | 0.231                       | 1.39          | 5.1                             |
| ATP #21 | H7   | <i>Scutellaria</i>  | <i>baicalensis</i>    | 2        | 2     | 0.1          | 1.325                     | 0.231                       | 1.39          | 5.6                             |
| ATP #21 | A8   | <i>Scutellaria</i>  | <i>baicalensis</i>    | 2        | 2     | 500          | 0.251                     | 0.231                       | 1.39          | 98.3                            |
| ATP #21 | B8   | <i>Scutellaria</i>  | <i>baicalensis</i>    | 2        | 2     | 250          | 0.261                     | 0.231                       | 1.39          | 97.4                            |

**S6 Table. Data from Titrations of Top Botanical Candidates for Inhibition of Fructose-Induced ATP Depletion.**

| Rxn     | Botanical Extract |              |                       |         |          |       | Sample<br>( OD <sub>570nm</sub> ) | Ave. No Fructose Controls<br>( OD <sub>570nm</sub> ) | Ave. Fructose Only Controls<br>( OD <sub>570nm</sub> ) | ATP Depletion<br>(%) | *ATP Depletion IC <sub>50</sub><br>(µg/mL) |
|---------|-------------------|--------------|-----------------------|---------|----------|-------|-----------------------------------|------------------------------------------------------|--------------------------------------------------------|----------------------|--------------------------------------------|
|         | ID                | Well         | Genus                 | Species | SampleID | Lot # |                                   |                                                      |                                                        |                      |                                            |
| ATP #21 | C8                | Scutellaria  | baicalensis           | 2       | 2        | 125   | 0.269                             | 0.231                                                | 1.39                                                   | 96.7                 |                                            |
| ATP #21 | D8                | Scutellaria  | baicalensis           | 2       | 2        | 50    | 0.582                             | 0.231                                                | 1.39                                                   | 69.7                 |                                            |
| ATP #21 | E8                | Scutellaria  | baicalensis           | 2       | 2        | 25    | 0.905                             | 0.231                                                | 1.39                                                   | 41.8                 |                                            |
| ATP #21 | F8                | Scutellaria  | baicalensis           | 2       | 2        | 10    | 1.143                             | 0.231                                                | 1.39                                                   | 21.3                 |                                            |
| ATP #21 | G8                | Scutellaria  | baicalensis           | 2       | 2        | 1     | 1.400                             | 0.231                                                | 1.39                                                   | -0.9                 |                                            |
| ATP #21 | H8                | Scutellaria  | baicalensis           | 2       | 2        | 0.1   | 1.387                             | 0.231                                                | 1.39                                                   | 0.3                  |                                            |
| ATP #21 | A9                | Petroselinum | crispum               | 3       | 2        | 500   | 0.515                             | 0.231                                                | 1.39                                                   | 75.5                 | 223.30                                     |
| ATP #21 | B9                | Petroselinum | crispum               | 3       | 2        | 250   | 0.524                             | 0.231                                                | 1.39                                                   | 74.7                 |                                            |
| ATP #21 | C9                | Petroselinum | crispum               | 3       | 2        | 125   | 1.039                             | 0.231                                                | 1.39                                                   | 30.3                 |                                            |
| ATP #21 | D9                | Petroselinum | crispum               | 3       | 2        | 50    | 1.133                             | 0.231                                                | 1.39                                                   | 22.2                 |                                            |
| ATP #21 | E9                | Petroselinum | crispum               | 3       | 2        | 25    | 1.204                             | 0.231                                                | 1.39                                                   | 16.0                 |                                            |
| ATP #21 | F9                | Petroselinum | crispum               | 3       | 2        | 10    | 1.202                             | 0.231                                                | 1.39                                                   | 16.2                 |                                            |
| ATP #21 | G9                | Petroselinum | crispum               | 3       | 2        | 1     | 1.214                             | 0.231                                                | 1.39                                                   | 15.2                 |                                            |
| ATP #21 | H9                | Petroselinum | crispum               | 3       | 2        | 0.1   | 1.192                             | 0.231                                                | 1.39                                                   | 17.1                 |                                            |
| ATP #21 | A10               | Petroselinum | crispum               | 3       | 2        | 500   | 0.496                             | 0.231                                                | 1.39                                                   | 77.1                 | 215.60                                     |
| ATP #21 | B10               | Petroselinum | crispum               | 3       | 2        | 250   | 0.533                             | 0.231                                                | 1.39                                                   | 73.9                 |                                            |
| ATP #21 | C10               | Petroselinum | crispum               | 3       | 2        | 125   | 1.049                             | 0.231                                                | 1.39                                                   | 29.4                 |                                            |
| ATP #21 | D10               | Petroselinum | crispum               | 3       | 2        | 50    | 1.134                             | 0.231                                                | 1.39                                                   | 22.1                 |                                            |
| ATP #21 | E10               | Petroselinum | crispum               | 3       | 2        | 25    | 1.122                             | 0.231                                                | 1.39                                                   | 23.1                 |                                            |
| ATP #21 | F10               | Petroselinum | crispum               | 3       | 2        | 10    | 1.178                             | 0.231                                                | 1.39                                                   | 18.3                 |                                            |
| ATP #21 | G10               | Petroselinum | crispum               | 3       | 2        | 1     | 1.247                             | 0.231                                                | 1.39                                                   | 12.3                 |                                            |
| ATP #21 | H10               | Petroselinum | crispum               | 3       | 2        | 0.1   | 1.228                             | 0.231                                                | 1.39                                                   | 14.0                 |                                            |
| ATP #21 | A11               | Petroselinum | crispum               | 3       | 2        | 500   | 0.482                             | 0.231                                                | 1.39                                                   | 78.3                 | 214.30                                     |
| ATP #21 | B11               | Petroselinum | crispum               | 3       | 2        | 250   | 0.484                             | 0.231                                                | 1.39                                                   | 78.2                 |                                            |
| ATP #21 | C11               | Petroselinum | crispum               | 3       | 2        | 125   | 0.815                             | 0.231                                                | 1.39                                                   | 49.6                 |                                            |
| ATP #21 | D11               | Petroselinum | crispum               | 3       | 2        | 50    | 0.942                             | 0.231                                                | 1.39                                                   | 38.7                 |                                            |
| ATP #21 | E11               | Petroselinum | crispum               | 3       | 2        | 25    | 0.964                             | 0.231                                                | 1.39                                                   | 36.8                 |                                            |
| ATP #21 | F11               | Petroselinum | crispum               | 3       | 2        | 10    | 0.985                             | 0.231                                                | 1.39                                                   | 34.9                 |                                            |
| ATP #21 | G11               | Petroselinum | crispum               | 3       | 2        | 1     | 0.885                             | 0.231                                                | 1.39                                                   | 43.6                 |                                            |
| ATP #21 | H11               | Petroselinum | crispum               | 3       | 2        | 0.1   | 0.867                             | 0.231                                                | 1.39                                                   | 45.1                 |                                            |
| ATP #22 | A1                |              | No Fructose Control   |         |          |       | -0.616                            | -0.591                                               | 0.884                                                  | 101.7                |                                            |
| ATP #22 | B1                |              | No Fructose Control   |         |          |       | -0.601                            | -0.591                                               | 0.884                                                  | 100.7                |                                            |
| ATP #22 | C1                |              | No Fructose Control   |         |          |       | -0.588                            | -0.591                                               | 0.884                                                  | 99.8                 |                                            |
| ATP #22 | D1                |              | No Fructose Control   |         |          |       | -0.583                            | -0.591                                               | 0.884                                                  | 99.5                 |                                            |
| ATP #22 | E1                |              | No Fructose Control   |         |          |       | -0.468                            | -0.591                                               | 0.884                                                  | 91.7                 |                                            |
| ATP #22 | F1                |              | No Fructose Control   |         |          |       | -0.656                            | -0.591                                               | 0.884                                                  | 104.4                |                                            |
| ATP #22 | G1                |              | No Fructose Control   |         |          |       | -0.771                            | -0.591                                               | 0.884                                                  | 112.2                |                                            |
| ATP #22 | H1                |              | No Fructose Control   |         |          |       | -0.623                            | -0.591                                               | 0.884                                                  | 102.2                |                                            |
| ATP #22 | A2                |              | Fructose Only Control |         |          |       | 0.889                             | -0.591                                               | 0.884                                                  | -0.3                 |                                            |
| ATP #22 | B2                |              | Fructose Only Control |         |          |       | 0.901                             | -0.591                                               | 0.884                                                  | -1.2                 |                                            |
| ATP #22 | C2                |              | Fructose Only Control |         |          |       | 0.940                             | -0.591                                               | 0.884                                                  | -3.8                 |                                            |
| ATP #22 | D2                |              | Fructose Only Control |         |          |       | 0.921                             | -0.591                                               | 0.884                                                  | -2.5                 |                                            |
| ATP #22 | E2                |              | Fructose Only Control |         |          |       | 0.874                             | -0.591                                               | 0.884                                                  | 0.7                  |                                            |
| ATP #22 | F2                |              | Fructose Only Control |         |          |       | 0.889                             | -0.591                                               | 0.884                                                  | -0.3                 |                                            |
| ATP #22 | G2                |              | Fructose Only Control |         |          |       | 0.735                             | -0.591                                               | 0.884                                                  | 10.1                 |                                            |
| ATP #22 | H2                |              | Fructose Only Control |         |          |       | 0.773                             | -0.591                                               | 0.884                                                  | 7.5                  |                                            |
| ATP #22 | A3                | Garcinia     | mangostana            | 4       | 2        | 500   | -0.148                            | -0.591                                               | 0.884                                                  | 70.0                 | 69.20                                      |
| ATP #22 | B3                | Garcinia     | mangostana            | 4       | 2        | 250   | -0.239                            | -0.591                                               | 0.884                                                  | 76.1                 |                                            |
| ATP #22 | C3                | Garcinia     | mangostana            | 4       | 2        | 125   | -0.100                            | -0.591                                               | 0.884                                                  | 66.7                 |                                            |
| ATP #22 | D3                | Garcinia     | mangostana            | 4       | 2        | 50    | 0.162                             | -0.591                                               | 0.884                                                  | 48.9                 |                                            |
| ATP #22 | E3                | Garcinia     | mangostana            | 4       | 2        | 25    | 0.606                             | -0.591                                               | 0.884                                                  | 18.8                 |                                            |
| ATP #22 | F3                | Garcinia     | mangostana            | 4       | 2        | 10    | 0.855                             | -0.591                                               | 0.884                                                  | 2.0                  |                                            |
| ATP #22 | G3                | Garcinia     | mangostana            | 4       | 2        | 1     | 0.810                             | -0.591                                               | 0.884                                                  | 5.0                  |                                            |
| ATP #22 | H3                | Garcinia     | mangostana            | 4       | 2        | 0.1   | 0.799                             | -0.591                                               | 0.884                                                  | 5.8                  |                                            |
| ATP #22 | A4                | Garcinia     | mangostana            | 4       | 2        | 500   | -0.164                            | -0.591                                               | 0.884                                                  | 71.1                 | 61.05                                      |
| ATP #22 | B4                | Garcinia     | mangostana            | 4       | 2        | 250   | -0.260                            | -0.591                                               | 0.884                                                  | 77.6                 |                                            |
| ATP #22 | C4                | Garcinia     | mangostana            | 4       | 2        | 125   | -0.155                            | -0.591                                               | 0.884                                                  | 70.4                 |                                            |
| ATP #22 | D4                | Garcinia     | mangostana            | 4       | 2        | 50    | 0.133                             | -0.591                                               | 0.884                                                  | 50.9                 |                                            |
| ATP #22 | E4                | Garcinia     | mangostana            | 4       | 2        | 25    | 0.597                             | -0.591                                               | 0.884                                                  | 19.5                 |                                            |
| ATP #22 | F4                | Garcinia     | mangostana            | 4       | 2        | 10    | 0.815                             | -0.591                                               | 0.884                                                  | 4.7                  |                                            |
| ATP #22 | G4                | Garcinia     | mangostana            | 4       | 2        | 1     | 0.811                             | -0.591                                               | 0.884                                                  | 4.9                  |                                            |
| ATP #22 | H4                | Garcinia     | mangostana            | 4       | 2        | 0.1   | 0.842                             | -0.591                                               | 0.884                                                  | 2.8                  |                                            |
| ATP #22 | A5                | Garcinia     | mangostana            | 4       | 2        | 500   | -0.112                            | -0.591                                               | 0.884                                                  | 67.5                 | 59.19                                      |
| ATP #22 | B5                | Garcinia     | mangostana            | 4       | 2        | 250   | -0.147                            | -0.591                                               | 0.884                                                  | 69.9                 |                                            |
| ATP #22 | C5                | Garcinia     | mangostana            | 4       | 2        | 125   | -0.075                            | -0.591                                               | 0.884                                                  | 65.0                 |                                            |
| ATP #22 | D5                | Garcinia     | mangostana            | 4       | 2        | 50    | 0.078                             | -0.591                                               | 0.884                                                  | 54.6                 |                                            |
| ATP #22 | E5                | Garcinia     | mangostana            | 4       | 2        | 25    | 0.424                             | -0.591                                               | 0.884                                                  | 31.2                 |                                            |
| ATP #22 | F5                | Garcinia     | mangostana            | 4       | 2        | 10    | 0.808                             | -0.591                                               | 0.884                                                  | 5.2                  |                                            |
| ATP #22 | G5                | Garcinia     | mangostana            | 4       | 2        | 1     | 0.689                             | -0.591                                               | 0.884                                                  | 13.2                 |                                            |
| ATP #22 | H5                | Garcinia     | mangostana            | 4       | 2        | 0.1   | 0.734                             | -0.591                                               | 0.884                                                  | 10.2                 |                                            |

IC<sub>50</sub>: half maximal inhibitory concentration. OD: optical density.

\*ATP Depletion IC<sub>50</sub>s were calculated using nonlinear regression (three parameters) in GraphPad Prism 5.03. To generate a best fit, an upper concentration (10,000 µg/mL at 100% inhibition) and a lower concentration (0.001 µg/mL at 0% inhibition) were added.
