# Supplementary material for: Bioactivity-Guided Identification of Botanical Inhibitors of Ketohexokinase
Source: PubMed Central journal article supplement (PMC4913896; doi:10.1371/journal.pone.0157458), 2016-06-20
Supplement: pone.0157458.s007.pdf [file pone.0157458.s007.pdf]

**S7 Table. Data from Titrations of Top Botanical Candidates for Inhibition of Fructose-induced Elevation in TG Levels.**

| Botanical Extract   |                     |          |       |              | TG (mg/dL)               | TG (mg/dL)             | TG      | TG Inhibition | *TG IC <sub>50</sub> |
|---------------------|---------------------|----------|-------|--------------|--------------------------|------------------------|---------|---------------|----------------------|
| Genus               | Species             | SampleID | Lot # | Conc (µg/mL) | (Fructose Only Controls) | (No Fructose Controls) | (mg/dL) | (%)           | (µg/mL)              |
| <i>Angelica</i>     | <i>archangelica</i> | 1        | 1     | 500          | 36                       | 39                     | -3      | 107.0         | 37.93                |
| <i>Angelica</i>     | <i>archangelica</i> | 1        | 1     | 200          | 44                       | 42                     | 2       | 95.3          |                      |
| <i>Angelica</i>     | <i>archangelica</i> | 1        | 1     | 100          | 56                       | 42                     | 14      | 67.4          |                      |
| <i>Angelica</i>     | <i>archangelica</i> | 1        | 1     | 50           | 57                       | 46                     | 11      | 74.4          |                      |
| <i>Angelica</i>     | <i>archangelica</i> | 1        | 1     | 25           | 75                       | 44                     | 31      | 27.9          |                      |
| <i>Angelica</i>     | <i>archangelica</i> | 1        | 1     | 12.5         | 82                       | 51                     | 31      | 27.9          |                      |
| <i>Angelica</i>     | <i>archangelica</i> | 1        | 1     | 0.6          | 99                       | 48                     | 51      | -18.6         |                      |
| <i>Angelica</i>     | <i>archangelica</i> | 1        | 1     | 0.3          | 95                       | 55                     | 40      | 7.0           |                      |
| <i>Angelica</i>     | <i>archangelica</i> | 1        | 1     | 0.1          | 103                      | 53                     | 50      | -16.3         |                      |
| <i>Angelica</i>     | <i>archangelica</i> | 1        | 1     | 0            | 96                       | 53                     | 43      | 0.0           |                      |
| <i>Angelica</i>     | <i>archangelica</i> | 1        | 1     | 500          | 40                       | 41                     | -1      | 102.5         | 146.50               |
| <i>Angelica</i>     | <i>archangelica</i> | 1        | 1     | 200          | 42                       | 44                     | -2      | 105.0         |                      |
| <i>Angelica</i>     | <i>archangelica</i> | 1        | 1     | 100          | 61                       | 39                     | 22      | 45.0          |                      |
| <i>Angelica</i>     | <i>archangelica</i> | 1        | 1     | 50           | 68                       | 34                     | 34      | 15.0          |                      |
| <i>Angelica</i>     | <i>archangelica</i> | 1        | 1     | 25           | 78                       | 45                     | 33      | 17.5          |                      |
| <i>Angelica</i>     | <i>archangelica</i> | 1        | 1     | 12.5         | 92                       | 46                     | 46      | -15.0         |                      |
| <i>Angelica</i>     | <i>archangelica</i> | 1        | 1     | 0.6          | 93                       | 48                     | 45      | -12.5         |                      |
| <i>Angelica</i>     | <i>archangelica</i> | 1        | 1     | 0.3          | 89                       | 51                     | 38      | 5.0           |                      |
| <i>Angelica</i>     | <i>archangelica</i> | 1        | 1     | 0.1          | 99                       | 50                     | 49      | -22.5         |                      |
| <i>Angelica</i>     | <i>archangelica</i> | 1        | 1     | 0            | 95                       | 55                     | 40      | 0.0           |                      |
| <i>Scutellaria</i>  | <i>baicalensis</i>  | 4        | 1     | 500          | 42                       | 46                     | -4      | 109.3         | 74.79                |
| <i>Scutellaria</i>  | <i>baicalensis</i>  | 4        | 1     | 200          | 40                       | 46                     | -6      | 114.0         |                      |
| <i>Scutellaria</i>  | <i>baicalensis</i>  | 4        | 1     | 100          | 56                       | 42                     | 14      | 67.4          |                      |
| <i>Scutellaria</i>  | <i>baicalensis</i>  | 4        | 1     | 50           | 68                       | 44                     | 24      | 44.2          |                      |
| <i>Scutellaria</i>  | <i>baicalensis</i>  | 4        | 1     | 25           | 81                       | 45                     | 36      | 16.3          |                      |
| <i>Scutellaria</i>  | <i>baicalensis</i>  | 4        | 1     | 12.5         | 86                       | 45                     | 41      | 4.7           |                      |
| <i>Scutellaria</i>  | <i>baicalensis</i>  | 4        | 1     | 0.6          | 81                       | 40                     | 41      | 4.7           |                      |
| <i>Scutellaria</i>  | <i>baicalensis</i>  | 4        | 1     | 0.3          | 94                       | 39                     | 55      | -27.9         |                      |
| <i>Scutellaria</i>  | <i>baicalensis</i>  | 4        | 1     | 0.1          | 99                       | 46                     | 53      | -23.3         |                      |
| <i>Scutellaria</i>  | <i>baicalensis</i>  | 4        | 1     | 0            | 89                       | 46                     | 43      | 0.0           |                      |
| <i>Scutellaria</i>  | <i>baicalensis</i>  | 4        | 1     | 500          | 42                       | 42                     | 0       | 100.0         | 30.44                |
| <i>Scutellaria</i>  | <i>baicalensis</i>  | 4        | 1     | 200          | 44                       | 42                     | 2       | 96.5          |                      |
| <i>Scutellaria</i>  | <i>baicalensis</i>  | 4        | 1     | 100          | 38                       | 45                     | -7      | 112.3         |                      |
| <i>Scutellaria</i>  | <i>baicalensis</i>  | 4        | 1     | 50           | 56                       | 46                     | 10      | 82.5          |                      |
| <i>Scutellaria</i>  | <i>baicalensis</i>  | 4        | 1     | 25           | 75                       | 47                     | 28      | 50.9          |                      |
| <i>Scutellaria</i>  | <i>baicalensis</i>  | 4        | 1     | 12.5         | 85                       | 48                     | 37      | 35.1          |                      |
| <i>Scutellaria</i>  | <i>baicalensis</i>  | 4        | 1     | 0.6          | 89                       | 51                     | 38      | 33.3          |                      |
| <i>Scutellaria</i>  | <i>baicalensis</i>  | 4        | 1     | 0.3          | 99                       | 52                     | 47      | 17.5          |                      |
| <i>Scutellaria</i>  | <i>baicalensis</i>  | 4        | 1     | 0.1          | 103                      | 49                     | 54      | 5.3           |                      |
| <i>Scutellaria</i>  | <i>baicalensis</i>  | 4        | 1     | 0            | 106                      | 49                     | 57      | 0.0           |                      |
| <i>Petroselinum</i> | <i>crispum</i>      | 6        | 1     | 500          | 46                       | 42                     | 4       | 92.0          | 414.00               |
| <i>Petroselinum</i> | <i>crispum</i>      | 6        | 1     | 200          | 65                       | 46                     | 19      | 62.0          |                      |
| <i>Petroselinum</i> | <i>crispum</i>      | 6        | 1     | 100          | 78                       | 44                     | 34      | 32.0          |                      |
| <i>Petroselinum</i> | <i>crispum</i>      | 6        | 1     | 50           | 90                       | 45                     | 45      | 10.0          |                      |
| <i>Petroselinum</i> | <i>crispum</i>      | 6        | 1     | 25           | 91                       | 51                     | 40      | 20.0          |                      |
| <i>Petroselinum</i> | <i>crispum</i>      | 6        | 1     | 12.5         | 89                       | 52                     | 37      | 26.0          |                      |
| <i>Petroselinum</i> | <i>crispum</i>      | 6        | 1     | 0.6          | 96                       | 46                     | 50      | 0.0           |                      |
| <i>Petroselinum</i> | <i>crispum</i>      | 6        | 1     | 0.3          | 94                       | 44                     | 50      | 0.0           |                      |
| <i>Petroselinum</i> | <i>crispum</i>      | 6        | 1     | 0.1          | 102                      | 52                     | 50      | 0.0           |                      |
| <i>Petroselinum</i> | <i>crispum</i>      | 6        | 1     | 0            | 89                       | 39                     | 50      | 0.0           |                      |
| <i>Petroselinum</i> | <i>crispum</i>      | 6        | 1     | 500          | 44                       | 42                     | 2       | 95.7          | 385.50               |
| <i>Petroselinum</i> | <i>crispum</i>      | 6        | 1     | 200          | 50                       | 38                     | 12      | 73.9          |                      |
| <i>Petroselinum</i> | <i>crispum</i>      | 6        | 1     | 100          | 68                       | 50                     | 18      | 60.9          |                      |
| <i>Petroselinum</i> | <i>crispum</i>      | 6        | 1     | 50           | 88                       | 46                     | 42      | 8.7           |                      |
| <i>Petroselinum</i> | <i>crispum</i>      | 6        | 1     | 25           | 86                       | 44                     | 42      | 8.7           |                      |
| <i>Petroselinum</i> | <i>crispum</i>      | 6        | 1     | 12.5         | 88                       | 50                     | 38      | 17.4          |                      |
| <i>Petroselinum</i> | <i>crispum</i>      | 6        | 1     | 0.6          | 89                       | 56                     | 33      | 28.3          |                      |
| <i>Petroselinum</i> | <i>crispum</i>      | 6        | 1     | 0.3          | 99                       | 62                     | 37      | 19.6          |                      |
| <i>Petroselinum</i> | <i>crispum</i>      | 6        | 1     | 0.1          | 102                      | 65                     | 37      | 19.6          |                      |
| <i>Petroselinum</i> | <i>crispum</i>      | 6        | 1     | 0            | 104                      | 58                     | 46      | 0.0           |                      |
| <i>Garcinia</i>     | <i>mangostana</i>   | 8        | 1     | 500          | 39                       | 46                     | -7      | 111.9         | 101.80               |
| <i>Garcinia</i>     | <i>mangostana</i>   | 8        | 1     | 200          | 38                       | 41                     | -3      | 105.1         |                      |
| <i>Garcinia</i>     | <i>mangostana</i>   | 8        | 1     | 100          | 56                       | 52                     | 4       | 93.2          |                      |
| <i>Garcinia</i>     | <i>mangostana</i>   | 8        | 1     | 50           | 78                       | 47                     | 31      | 47.5          |                      |
| <i>Garcinia</i>     | <i>mangostana</i>   | 8        | 1     | 25           | 89                       | 46                     | 43      | 27.1          |                      |
| <i>Garcinia</i>     | <i>mangostana</i>   | 8        | 1     | 12.5         | 101                      | 55                     | 46      | 22.0          |                      |
| <i>Garcinia</i>     | <i>mangostana</i>   | 8        | 1     | 0.6          | 106                      | 53                     | 53      | 10.2          |                      |
| <i>Garcinia</i>     | <i>mangostana</i>   | 8        | 1     | 0.3          | 96                       | 52                     | 44      | 25.4          |                      |
| <i>Garcinia</i>     | <i>mangostana</i>   | 8        | 1     | 0.1          | 103                      | 56                     | 47      | 20.3          |                      |
| <i>Garcinia</i>     | <i>mangostana</i>   | 8        | 1     | 0            | 101                      | 42                     | 59      | 0.0           |                      |
| <i>Garcinia</i>     | <i>mangostana</i>   | 8        | 1     | 500          | 42                       | 43                     | -1      | 101.7         | 44.12                |
| <i>Garcinia</i>     | <i>mangostana</i>   | 8        | 1     | 200          | 45                       | 45                     | 0       | 100.0         |                      |
| <i>Garcinia</i>     | <i>mangostana</i>   | 8        | 1     | 100          | 56                       | 51                     | 5       | 91.5          |                      |
| <i>Garcinia</i>     | <i>mangostana</i>   | 8        | 1     | 50           | 66                       | 51                     | 15      | 74.6          |                      |
| <i>Garcinia</i>     | <i>mangostana</i>   | 8        | 1     | 25           | 74                       | 44                     | 30      | 49.2          |                      |
| <i>Garcinia</i>     | <i>mangostana</i>   | 8        | 1     | 12.5         | 105                      | 48                     | 57      | 3.4           |                      |
| <i>Garcinia</i>     | <i>mangostana</i>   | 8        | 1     | 0.6          | 104                      | 48                     | 56      | 5.1           |                      |
| <i>Garcinia</i>     | <i>mangostana</i>   | 8        | 1     | 0.3          | 99                       | 49                     | 50      | 15.3          |                      |
| <i>Garcinia</i>     | <i>mangostana</i>   | 8        | 1     | 0.1          | 106                      | 51                     | 55      | 6.8           |                      |
| <i>Garcinia</i>     | <i>mangostana</i>   | 8        | 1     | 0            | 110                      | 51                     | 59      | 0.0           |                      |

**S7 Table. Data from Titrations of Top Botanical Candidates for Inhibition of Fructose-induced Elevation in TG Levels.**

| Botanical Extract   |                     |          |       |              | TG (mg/dL)               | TG (mg/dL)             | TG      | TG Inhibition | *TG IC <sub>50</sub> |
|---------------------|---------------------|----------|-------|--------------|--------------------------|------------------------|---------|---------------|----------------------|
| Genus               | Species             | SampleID | Lot # | Conc (µg/mL) | (Fructose Only Controls) | (No Fructose Controls) | (mg/dL) | (%)           | (µg/mL)              |
| <i>Angelica</i>     | <i>archangelica</i> | 1        | 2     | 500          | 39                       | 43                     | -4      | 105.8         | 75.67                |
| <i>Angelica</i>     | <i>archangelica</i> | 1        | 2     | 200          | 44                       | 39                     | 5       | 92.8          |                      |
| <i>Angelica</i>     | <i>archangelica</i> | 1        | 2     | 100          | 59                       | 45                     | 14      | 79.7          |                      |
| <i>Angelica</i>     | <i>archangelica</i> | 1        | 2     | 50           | 62                       | 41                     | 21      | 69.6          |                      |
| <i>Angelica</i>     | <i>archangelica</i> | 1        | 2     | 25           | 89                       | 42                     | 47      | 31.9          |                      |
| <i>Angelica</i>     | <i>archangelica</i> | 1        | 2     | 12.5         | 95                       | 41                     | 54      | 21.7          |                      |
| <i>Angelica</i>     | <i>archangelica</i> | 1        | 2     | 0.6          | 94                       | 40                     | 54      | 21.7          |                      |
| <i>Angelica</i>     | <i>archangelica</i> | 1        | 2     | 0.3          | 89                       | 38                     | 51      | 26.1          |                      |
| <i>Angelica</i>     | <i>archangelica</i> | 1        | 2     | 0.1          | 99                       | 38                     | 61      | 11.6          |                      |
| <i>Angelica</i>     | <i>archangelica</i> | 1        | 2     | 0            | 105                      | 36                     | 69      | 0.0           |                      |
| <i>Angelica</i>     | <i>archangelica</i> | 1        | 2     | 500          | 41                       | 43                     | -2      | 103.6         | 41.96                |
| <i>Angelica</i>     | <i>archangelica</i> | 1        | 2     | 200          | 46                       | 48                     | -2      | 103.6         |                      |
| <i>Angelica</i>     | <i>archangelica</i> | 1        | 2     | 100          | 49                       | 44                     | 5       | 91.1          |                      |
| <i>Angelica</i>     | <i>archangelica</i> | 1        | 2     | 50           | 66                       | 46                     | 20      | 64.3          |                      |
| <i>Angelica</i>     | <i>archangelica</i> | 1        | 2     | 25           | 79                       | 47                     | 32      | 42.9          |                      |
| <i>Angelica</i>     | <i>archangelica</i> | 1        | 2     | 12.5         | 99                       | 51                     | 48      | 14.3          |                      |
| <i>Angelica</i>     | <i>archangelica</i> | 1        | 2     | 0.6          | 98                       | 53                     | 45      | 19.6          |                      |
| <i>Angelica</i>     | <i>archangelica</i> | 1        | 2     | 0.3          | 94                       | 39                     | 55      | 1.8           |                      |
| <i>Angelica</i>     | <i>archangelica</i> | 1        | 2     | 0.1          | 106                      | 38                     | 68      | -21.4         |                      |
| <i>Angelica</i>     | <i>archangelica</i> | 1        | 2     | 0            | 110                      | 54                     | 56      | 0.0           |                      |
| <i>Scutellaria</i>  | <i>baicalensis</i>  | 2        | 2     | 500          | 46                       | 42                     | 4       | 93.5          | 19.49                |
| <i>Scutellaria</i>  | <i>baicalensis</i>  | 2        | 2     | 200          | 45                       | 45                     | 0       | 100.0         |                      |
| <i>Scutellaria</i>  | <i>baicalensis</i>  | 2        | 2     | 100          | 49                       | 44                     | 5       | 91.9          |                      |
| <i>Scutellaria</i>  | <i>baicalensis</i>  | 2        | 2     | 50           | 59                       | 40                     | 19      | 69.4          |                      |
| <i>Scutellaria</i>  | <i>baicalensis</i>  | 2        | 2     | 25           | 58                       | 45                     | 13      | 79.0          |                      |
| <i>Scutellaria</i>  | <i>baicalensis</i>  | 2        | 2     | 12.5         | 83                       | 42                     | 41      | 33.9          |                      |
| <i>Scutellaria</i>  | <i>baicalensis</i>  | 2        | 2     | 0.6          | 91                       | 41                     | 50      | 19.4          |                      |
| <i>Scutellaria</i>  | <i>baicalensis</i>  | 2        | 2     | 0.3          | 95                       | 43                     | 52      | 16.1          |                      |
| <i>Scutellaria</i>  | <i>baicalensis</i>  | 2        | 2     | 0.1          | 101                      | 43                     | 58      | 6.5           |                      |
| <i>Scutellaria</i>  | <i>baicalensis</i>  | 2        | 2     | 0            | 101                      | 39                     | 62      | 0.0           |                      |
| <i>Scutellaria</i>  | <i>baicalensis</i>  | 2        | 2     | 500          | 42                       | 41                     | 1       | 98.4          | 13.10                |
| <i>Scutellaria</i>  | <i>baicalensis</i>  | 2        | 2     | 200          | 51                       | 39                     | 12      | 80.3          |                      |
| <i>Scutellaria</i>  | <i>baicalensis</i>  | 2        | 2     | 100          | 51                       | 46                     | 5       | 91.8          |                      |
| <i>Scutellaria</i>  | <i>baicalensis</i>  | 2        | 2     | 50           | 46                       | 42                     | 4       | 93.4          |                      |
| <i>Scutellaria</i>  | <i>baicalensis</i>  | 2        | 2     | 25           | 59                       | 41                     | 18      | 70.5          |                      |
| <i>Scutellaria</i>  | <i>baicalensis</i>  | 2        | 2     | 12.5         | 79                       | 45                     | 34      | 44.3          |                      |
| <i>Scutellaria</i>  | <i>baicalensis</i>  | 2        | 2     | 0.6          | 95                       | 51                     | 44      | 27.9          |                      |
| <i>Scutellaria</i>  | <i>baicalensis</i>  | 2        | 2     | 0.3          | 101                      | 49                     | 52      | 14.8          |                      |
| <i>Scutellaria</i>  | <i>baicalensis</i>  | 2        | 2     | 0.1          | 100                      | 42                     | 58      | 4.9           |                      |
| <i>Scutellaria</i>  | <i>baicalensis</i>  | 2        | 2     | 0            | 99                       | 38                     | 61      | 0.0           |                      |
| <i>Petroselinum</i> | <i>crispum</i>      | 3        | 2     | 500          | 51                       | 41                     | 10      | 82.1          | 240.80               |
| <i>Petroselinum</i> | <i>crispum</i>      | 3        | 2     | 200          | 58                       | 45                     | 13      | 76.8          |                      |
| <i>Petroselinum</i> | <i>crispum</i>      | 3        | 2     | 100          | 66                       | 38                     | 28      | 50.0          |                      |
| <i>Petroselinum</i> | <i>crispum</i>      | 3        | 2     | 50           | 98                       | 38                     | 60      | -7.1          |                      |
| <i>Petroselinum</i> | <i>crispum</i>      | 3        | 2     | 25           | 92                       | 35                     | 57      | -1.8          |                      |
| <i>Petroselinum</i> | <i>crispum</i>      | 3        | 2     | 12.5         | 102                      | 46                     | 56      | 0.0           |                      |
| <i>Petroselinum</i> | <i>crispum</i>      | 3        | 2     | 0.6          | 101                      | 42                     | 59      | -5.4          |                      |
| <i>Petroselinum</i> | <i>crispum</i>      | 3        | 2     | 0.3          | 97                       | 51                     | 46      | 17.9          |                      |
| <i>Petroselinum</i> | <i>crispum</i>      | 3        | 2     | 0.1          | 106                      | 50                     | 56      | 0.0           |                      |
| <i>Petroselinum</i> | <i>crispum</i>      | 3        | 2     | 0            | 105                      | 49                     | 56      | 0.0           |                      |
| <i>Petroselinum</i> | <i>crispum</i>      | 3        | 2     | 500          | 66                       | 40                     | 26      | 60.6          | 291.30               |
| <i>Petroselinum</i> | <i>crispum</i>      | 3        | 2     | 200          | 76                       | 39                     | 37      | 43.9          |                      |
| <i>Petroselinum</i> | <i>crispum</i>      | 3        | 2     | 100          | 86                       | 36                     | 50      | 24.2          |                      |
| <i>Petroselinum</i> | <i>crispum</i>      | 3        | 2     | 50           | 97                       | 42                     | 55      | 16.7          |                      |
| <i>Petroselinum</i> | <i>crispum</i>      | 3        | 2     | 25           | 97                       | 44                     | 53      | 19.7          |                      |
| <i>Petroselinum</i> | <i>crispum</i>      | 3        | 2     | 12.5         | 102                      | 48                     | 54      | 18.2          |                      |
| <i>Petroselinum</i> | <i>crispum</i>      | 3        | 2     | 0.6          | 106                      | 48                     | 58      | 12.1          |                      |
| <i>Petroselinum</i> | <i>crispum</i>      | 3        | 2     | 0.3          | 110                      | 46                     | 64      | 3.0           |                      |
| <i>Petroselinum</i> | <i>crispum</i>      | 3        | 2     | 0.1          | 116                      | 49                     | 67      | -1.5          |                      |
| <i>Petroselinum</i> | <i>crispum</i>      | 3        | 2     | 0            | 112                      | 46                     | 66      | 0.0           |                      |
| <i>Garcinia</i>     | <i>mangostana</i>   | 4        | 2     | 500          | 44                       | 38                     | 6       | 89.5          | 22.53                |
| <i>Garcinia</i>     | <i>mangostana</i>   | 4        | 2     | 200          | 44                       | 46                     | -2      | 103.5         |                      |
| <i>Garcinia</i>     | <i>mangostana</i>   | 4        | 2     | 100          | 51                       | 42                     | 9       | 84.2          |                      |
| <i>Garcinia</i>     | <i>mangostana</i>   | 4        | 2     | 50           | 59                       | 42                     | 17      | 70.2          |                      |
| <i>Garcinia</i>     | <i>mangostana</i>   | 4        | 2     | 25           | 65                       | 41                     | 24      | 57.9          |                      |
| <i>Garcinia</i>     | <i>mangostana</i>   | 4        | 2     | 12.5         | 83                       | 44                     | 39      | 31.6          |                      |
| <i>Garcinia</i>     | <i>mangostana</i>   | 4        | 2     | 0.6          | 93                       | 44                     | 49      | 14.0          |                      |
| <i>Garcinia</i>     | <i>mangostana</i>   | 4        | 2     | 0.3          | 102                      | 47                     | 55      | 3.5           |                      |
| <i>Garcinia</i>     | <i>mangostana</i>   | 4        | 2     | 0.1          | 104                      | 43                     | 61      | -7.0          |                      |
| <i>Garcinia</i>     | <i>mangostana</i>   | 4        | 2     | 0            | 100                      | 43                     | 57      | 0.0           |                      |
| <i>Garcinia</i>     | <i>mangostana</i>   | 4        | 2     | 500          | 46                       | 41                     | 5       | 90.4          | 12.42                |
| <i>Garcinia</i>     | <i>mangostana</i>   | 4        | 2     | 200          | 39                       | 44                     | -5      | 109.6         |                      |
| <i>Garcinia</i>     | <i>mangostana</i>   | 4        | 2     | 100          | 47                       | 51                     | -4      | 107.7         |                      |
| <i>Garcinia</i>     | <i>mangostana</i>   | 4        | 2     | 50           | 49                       | 49                     | 0       | 100.0         |                      |
| <i>Garcinia</i>     | <i>mangostana</i>   | 4        | 2     | 25           | 56                       | 46                     | 10      | 80.8          |                      |
| <i>Garcinia</i>     | <i>mangostana</i>   | 4        | 2     | 12.5         | 79                       | 52                     | 27      | 48.1          |                      |
| <i>Garcinia</i>     | <i>mangostana</i>   | 4        | 2     | 0.6          | 78                       | 48                     | 30      | 42.3          |                      |
| <i>Garcinia</i>     | <i>mangostana</i>   | 4        | 2     | 0.3          | 92                       | 48                     | 44      | 15.4          |                      |
| <i>Garcinia</i>     | <i>mangostana</i>   | 4        | 2     | 0.1          | 100                      | 49                     | 51      | 1.9           |                      |
| <i>Garcinia</i>     | <i>mangostana</i>   | 4        | 2     | 0            | 101                      | 49                     | 52      | 0.0           |                      |

**S7 Table. Data from Titrations of Top Botanical Candidates for Inhibition of Fructose-induced Elevation in TG Levels.**

| Botanical Extract |         |          |       |              | TG (mg/dL)               | TG (mg/dL)             | TG      | TG Inhibition | *TG IC <sub>50</sub> |
|-------------------|---------|----------|-------|--------------|--------------------------|------------------------|---------|---------------|----------------------|
| Genus             | Species | SampleID | Lot # | Conc (µg/mL) | (Fructose Only Controls) | (No Fructose Controls) | (mg/dL) | (%)           | (µg/mL)              |

IC<sub>50</sub>: half maximal inhibitory concentration. OD: optical density. TG: triglycerides.

\*TG IC<sub>50</sub>s were calculated using nonlinear regression (three parameters) in GraphPad Prism 5.03. To generate a best fit, an upper concentration (10,000 µg/mL at 100% inhibition) and a lower concentration (0.001 µg/mL at 0% inhibition) were added.
