# Supplementary material for: Bioactivity-Guided Identification of Botanical Inhibitors of Ketohexokinase
Source: PubMed Central journal article supplement (PMC4913896; doi:10.1371/journal.pone.0157458), 2016-06-20
Supplement: pone.0157458.s008.pdf [file pone.0157458.s008.pdf]

**S8 Table. Data from Titrations of Top Botanical Candidates for Inhibition of Fructose-induced Elevation in UA Levels.**

| Botanical Extract |              |          |       |              | UA (mg/dL)               | UA (mg/dL)             | UA      | UA Inhibition | *UA IC <sub>50</sub> |
|-------------------|--------------|----------|-------|--------------|--------------------------|------------------------|---------|---------------|----------------------|
| Genus             | Species      | SampleID | Lot # | Conc (µg/mL) | (Fructose Only Controls) | (No Fructose Controls) | (mg/dL) | (%)           | (µg/mL)              |
| Angelica          | archangelica | 1        | 2     | 500          | 0.95                     | 1.06                   | -0.11   | 121.2         | 1.56                 |
| Angelica          | archangelica | 1        | 2     | 200          | 1.13                     | 0.95                   | 0.18    | 65.4          |                      |
| Angelica          | archangelica | 1        | 2     | 100          | 1.23                     | 0.98                   | 0.25    | 51.9          |                      |
| Angelica          | archangelica | 1        | 2     | 50           | 1.25                     | 1.25                   | 0       | 100.0         |                      |
| Angelica          | archangelica | 1        | 2     | 25           | 1.38                     | 1.32                   | 0.06    | 88.5          |                      |
| Angelica          | archangelica | 1        | 2     | 12.5         | 1.48                     | 1.21                   | 0.27    | 48.1          |                      |
| Angelica          | archangelica | 1        | 2     | 0.6          | 1.75                     | 1.21                   | 0.54    | -3.8          |                      |
| Angelica          | archangelica | 1        | 2     | 0.3          | 1.85                     | 1.2                    | 0.65    | -25.0         |                      |
| Angelica          | archangelica | 1        | 2     | 0.1          | 1.82                     | 1.06                   | 0.76    | -46.2         |                      |
| Angelica          | archangelica | 1        | 2     | 0            | 2.02                     | 1.5                    | 0.52    | 0.0           |                      |
| Angelica          | archangelica | 1        | 2     | 500          | 1.06                     | 1.06                   | 0       | 100.0         | 33.35                |
| Angelica          | archangelica | 1        | 2     | 200          | 1.15                     | 0.95                   | 0.2     | 80.0          |                      |
| Angelica          | archangelica | 1        | 2     | 100          | 1.28                     | 0.98                   | 0.3     | 70.0          |                      |
| Angelica          | archangelica | 1        | 2     | 50           | 1.45                     | 1.25                   | 0.2     | 80.0          |                      |
| Angelica          | archangelica | 1        | 2     | 25           | 1.86                     | 1.32                   | 0.54    | 46.0          |                      |
| Angelica          | archangelica | 1        | 2     | 12.5         | 2.06                     | 1.21                   | 0.85    | 15.0          |                      |
| Angelica          | archangelica | 1        | 2     | 0.6          | 2.16                     | 1.21                   | 0.95    | 5.0           |                      |
| Angelica          | archangelica | 1        | 2     | 0.3          | 2.08                     | 1.2                    | 0.88    | 12.0          |                      |
| Angelica          | archangelica | 1        | 2     | 0.1          | 2.1                      | 1.06                   | 1.04    | -4.0          |                      |
| Angelica          | archangelica | 1        | 2     | 0            | 2.15                     | 1.15                   | 1       | 0.0           |                      |
| Scutellaria       | baicalensis  | 2        | 2     | 500          | 1.11                     | 1.21                   | -0.1    | 109.3         | 51.01                |
| Scutellaria       | baicalensis  | 2        | 2     | 200          | 1.31                     | 1.06                   | 0.25    | 76.6          |                      |
| Scutellaria       | baicalensis  | 2        | 2     | 100          | 1.23                     | 1.12                   | 0.11    | 89.7          |                      |
| Scutellaria       | baicalensis  | 2        | 2     | 50           | 1.46                     | 1.11                   | 0.35    | 67.3          |                      |
| Scutellaria       | baicalensis  | 2        | 2     | 25           | 1.67                     | 1.14                   | 0.53    | 50.5          |                      |
| Scutellaria       | baicalensis  | 2        | 2     | 12.5         | 1.66                     | 1.15                   | 0.51    | 52.3          |                      |
| Scutellaria       | baicalensis  | 2        | 2     | 0.6          | 1.86                     | 1.01                   | 0.85    | 20.6          |                      |
| Scutellaria       | baicalensis  | 2        | 2     | 0.3          | 1.86                     | 1.23                   | 0.63    | 41.1          |                      |
| Scutellaria       | baicalensis  | 2        | 2     | 0.1          | 2.11                     | 1.28                   | 0.83    | 22.4          |                      |
| Scutellaria       | baicalensis  | 2        | 2     | 0            | 2.13                     | 1.06                   | 1.07    | 0.0           |                      |
| Scutellaria       | baicalensis  | 2        | 2     | 500          | 1.1                      | 1.19                   | -0.09   | 108.1         | 0.22                 |
| Scutellaria       | baicalensis  | 2        | 2     | 200          | 1.08                     | 1.16                   | -0.08   | 107.2         |                      |
| Scutellaria       | baicalensis  | 2        | 2     | 100          | 1.07                     | 1.09                   | -0.02   | 101.8         |                      |
| Scutellaria       | baicalensis  | 2        | 2     | 50           | 1.19                     | 1.11                   | 0.08    | 92.8          |                      |
| Scutellaria       | baicalensis  | 2        | 2     | 25           | 1.36                     | 1.19                   | 0.17    | 84.7          |                      |
| Scutellaria       | baicalensis  | 2        | 2     | 12.5         | 1.46                     | 1.23                   | 0.23    | 79.3          |                      |
| Scutellaria       | baicalensis  | 2        | 2     | 0.6          | 1.51                     | 1.29                   | 0.22    | 80.2          |                      |
| Scutellaria       | baicalensis  | 2        | 2     | 0.3          | 1.91                     | 1.26                   | 0.65    | 41.4          |                      |
| Scutellaria       | baicalensis  | 2        | 2     | 0.1          | 2.06                     | 1.23                   | 0.83    | 25.2          |                      |
| Scutellaria       | baicalensis  | 2        | 2     | 0            | 2.23                     | 1.12                   | 1.11    | 0.0           |                      |
| Petroselinum      | crispum      | 3        | 2     | 500          | 1.01                     | 1.1                    | -0.09   | 112.0         | 31.28                |
| Petroselinum      | crispum      | 3        | 2     | 200          | 1.06                     | 1.02                   | 0.04    | 94.7          |                      |
| Petroselinum      | crispum      | 3        | 2     | 100          | 1.15                     | 0.95                   | 0.2     | 73.3          |                      |
| Petroselinum      | crispum      | 3        | 2     | 50           | 0.99                     | 0.85                   | 0.14    | 81.3          |                      |
| Petroselinum      | crispum      | 3        | 2     | 25           | 1.02                     | 0.99                   | 0.03    | 96.0          |                      |
| Petroselinum      | crispum      | 3        | 2     | 12.5         | 1.29                     | 1.01                   | 0.28    | 62.7          |                      |
| Petroselinum      | crispum      | 3        | 2     | 0.6          | 1.35                     | 1.02                   | 0.33    | 56.0          |                      |
| Petroselinum      | crispum      | 3        | 2     | 0.3          | 1.36                     | 1.12                   | 0.24    | 68.0          |                      |
| Petroselinum      | crispum      | 3        | 2     | 0.1          | 1.56                     | 1.11                   | 0.45    | 40.0          |                      |
| Petroselinum      | crispum      | 3        | 2     | 0            | 1.86                     | 1.11                   | 0.75    | 0.0           |                      |
| Petroselinum      | crispum      | 3        | 2     | 500          | 1.16                     | 1.06                   | 0.1     | 90.9          | 26.37                |
| Petroselinum      | crispum      | 3        | 2     | 200          | 1.19                     | 1.09                   | 0.1     | 90.9          |                      |
| Petroselinum      | crispum      | 3        | 2     | 100          | 1.29                     | 1.16                   | 0.13    | 88.2          |                      |
| Petroselinum      | crispum      | 3        | 2     | 50           | 1.49                     | 1.12                   | 0.37    | 66.4          |                      |
| Petroselinum      | crispum      | 3        | 2     | 25           | 1.56                     | 1.11                   | 0.45    | 59.1          |                      |
| Petroselinum      | crispum      | 3        | 2     | 12.5         | 1.79                     | 1.11                   | 0.68    | 38.2          |                      |
| Petroselinum      | crispum      | 3        | 2     | 0.6          | 1.85                     | 1.16                   | 0.69    | 37.3          |                      |
| Petroselinum      | crispum      | 3        | 2     | 0.3          | 2.21                     | 1.23                   | 0.98    | 10.9          |                      |
| Petroselinum      | crispum      | 3        | 2     | 0.1          | 2.25                     | 1.22                   | 1.03    | 6.4           |                      |
| Petroselinum      | crispum      | 3        | 2     | 0            | 2.29                     | 1.19                   | 1.1     | 0.0           |                      |
| Garcinia          | mangostana   | 4        | 2     | 500          | 1.03                     | 0.85                   | 0.18    | 70.0          | 0.65                 |
| Garcinia          | mangostana   | 4        | 2     | 200          | 1.13                     | 1.13                   | 0       | 100.0         |                      |
| Garcinia          | mangostana   | 4        | 2     | 100          | 1.23                     | 1.15                   | 0.08    | 86.7          |                      |
| Garcinia          | mangostana   | 4        | 2     | 50           | 1.25                     | 1.21                   | 0.04    | 93.3          |                      |
| Garcinia          | mangostana   | 4        | 2     | 25           | 1.19                     | 1.28                   | -0.09   | 115.0         |                      |
| Garcinia          | mangostana   | 4        | 2     | 12.5         | 1.35                     | 1.21                   | 0.14    | 76.7          |                      |
| Garcinia          | mangostana   | 4        | 2     | 0.6          | 1.49                     | 1.16                   | 0.33    | 45.0          |                      |
| Garcinia          | mangostana   | 4        | 2     | 0.3          | 1.48                     | 1.16                   | 0.32    | 46.7          |                      |
| Garcinia          | mangostana   | 4        | 2     | 0.1          | 1.59                     | 1.12                   | 0.47    | 21.7          |                      |
| Garcinia          | mangostana   | 4        | 2     | 0            | 1.76                     | 1.16                   | 0.6     | 0.0           |                      |
| Garcinia          | mangostana   | 4        | 2     | 500          | 0.98                     | 1.06                   | -0.08   | 108.4         | 6.85                 |
| Garcinia          | mangostana   | 4        | 2     | 200          | 0.97                     | 0.99                   | -0.02   | 102.1         |                      |
| Garcinia          | mangostana   | 4        | 2     | 100          | 1.06                     | 1.16                   | -0.1    | 110.5         |                      |
| Garcinia          | mangostana   | 4        | 2     | 50           | 1.02                     | 1.1                    | -0.08   | 108.4         |                      |
| Garcinia          | mangostana   | 4        | 2     | 25           | 1.15                     | 1.09                   | 0.06    | 93.7          |                      |
| Garcinia          | mangostana   | 4        | 2     | 12.5         | 1.28                     | 1.15                   | 0.13    | 86.3          |                      |
| Garcinia          | mangostana   | 4        | 2     | 0.6          | 1.49                     | 1.13                   | 0.36    | 62.1          |                      |
| Garcinia          | mangostana   | 4        | 2     | 0.3          | 1.52                     | 1.2                    | 0.32    | 66.3          |                      |
| Garcinia          | mangostana   | 4        | 2     | 0.1          | 1.66                     | 1.09                   | 0.57    | 40.0          |                      |
| Garcinia          | mangostana   | 4        | 2     | 0            | 2.09                     | 1.14                   | 0.95    | 0.0           |                      |

**S8 Table. Data from Titrations of Top Botanical Candidates for Inhibition of Fructose-induced Elevation in UA Levels.**

| Botanical Extract |         |          |       |              | UA (mg/dL)               | UA (mg/dL)             | UA      | UA Inhibition | *UA IC <sub>50</sub> |
|-------------------|---------|----------|-------|--------------|--------------------------|------------------------|---------|---------------|----------------------|
| Genus             | Species | SampleID | Lot # | Conc (µg/mL) | (Fructose Only Controls) | (No Fructose Controls) | (mg/dL) | (%)           | (µg/mL)              |

IC<sub>50</sub>: half maximal inhibitory concentration. OD: optical density. UA: uric acid.

\*UA IC<sub>50</sub>s were calculated using nonlinear regression (three parameters) in GraphPad Prism 5.03. To generate a best fit, an upper concentration (10,000 µg/mL at 100% inhibition) and a lower concentration (0.001 µg/mL at 0% inhibition) were added.
